# Supplementary material for: Integrating the characteristic genes of macrophage pseudotime analysis in single-cell RNA-seq to construct a prediction model of atherosclerosis
Source: publisher site journal article supplement (doi:10.18632/aging.204856), 2023-07-08
Supplement: Supplementary file [file aging-v15i13-204856-supplementary-material-SD6.pdf]

**Supplementary Table 6. The intersection of 50 macrophage-related genes.**

---

S100A11  
ACTA2  
EMP2  
MAF  
TAGLN  
NRP1  
MYL9  
CAV1  
FTL  
CALD1  
DSTN  
KCNMA1  
DAB2  
CSTB  
TMEM176B  
FILIP1L  
LGMN  
TPM2  
PPP1R14A  
SPARCL1  
MAP1B  
PLAU  
RASSF4  
RGS5  
OGN  
CTSC  
MYH11  
FOLR2  
MMP19  
C1QB  
RGCC  
CTSL  
VSIG4  
C1QC  
CSF1R  
SLCO2B1  
C1QA  
MYH10  
STAB1  
LMOD1  
MRC1  
SERPINF1  
C2  
CD163  
ANPEP  
PLIN2  
CD52  
IL1RN  
FABP5  
CD36

---
