# Supplementary material for: Integrating the characteristic genes of macrophage pseudotime analysis in single-cell RNA-seq to construct a prediction model of atherosclerosis
Source: Aging (Albany NY). 2023 Jul 8;15(13):6361–79. doi: 10.18632/aging.204856 (PMC10373969; doi:10.18632/aging.204856)
Supplement: Supplementary Table 1 [file aging-15-204856-s001.xlsx]

## Sheet: Sheet1
Supplementary Table 1. Marker genes of the 45 clusters.
	p_val	avg_log2FC	pct.1	pct.2	p_val_adj	cluster	gene
GZMK	0	2.58964	0.868	0.195	0	0	GZMK
CCL5	0	2.41658	0.974	0.31	0	0	CCL5
CCL4	0	2.25852	0.906	0.423	0	0	CCL4
GZMA	0	2.14128	0.93	0.253	0	0	GZMA
GZMH	0	2.07519	0.62	0.107	0	0	GZMH
NKG7	0	1.99837	0.841	0.178	0	0	NKG7
CST7	0	1.98689	0.858	0.232	0	0	CST7
CD8A	0	1.95047	0.566	0.075	0	0	CD8A
IFNG	0	1.80292	0.306	0.067	0	0	IFNG
CD8B	0	1.76791	0.484	0.06	0	0	CD8B
DUSP2	0	1.72332	0.847	0.43	0	0	DUSP2
TRBC2	0	1.72214	0.835	0.296	0	0	TRBC2
CCL4L2	0	1.67343	0.53	0.251	0	0	CCL4L2
IL32	0	1.65133	0.967	0.44	0	0	IL32
CD3D	0	1.60076	0.821	0.272	0	0	CD3D
TRAC	0	1.58471	0.84	0.299	0	0	TRAC
CD3G	0	1.50937	0.765	0.244	0	0	CD3G
CD2	0	1.46962	0.856	0.309	0	0	CD2
APOBEC3G	0	1.45751	0.596	0.236	0	0	APOBEC3G
CD3E	0	1.45504	0.758	0.257	0	0	CD3E
GZMM	0	1.33893	0.569	0.158	0	0	GZMM
TNF	0	1.3291	0.425	0.179	0	0	TNF
CTSW	0	1.30378	0.59	0.161	0	0	CTSW
CD69	0	1.27804	0.863	0.421	0	0	CD69
HCST	0	1.25006	0.853	0.491	0	0	HCST
CXCR4	0	1.24657	0.886	0.543	0	0	CXCR4
CORO1A	0	1.20832	0.832	0.483	0	0	CORO1A
CD52	0	1.20224	0.849	0.456	0	0	CD52
PTPRC	0	1.18139	0.953	0.594	0	0	PTPRC
TRBC1	0	1.16415	0.492	0.197	0	0	TRBC1
CRTAM	0	1.15025	0.265	0.054	0	0	CRTAM
LCK	0	1.14643	0.56	0.194	0	0	LCK
RAC2	0	1.12528	0.748	0.432	0	0	RAC2
RARRES3	0	1.12379	0.68	0.414	0	0	RARRES3
TUBA4A	0	1.1042	0.645	0.385	0	0	TUBA4A
GZMB	0	1.08125	0.288	0.07	0	0	GZMB
CD48	0	1.04259	0.753	0.431	0	0	CD48
KLRG1	0	1.04136	0.31	0.073	0	0	KLRG1
IL2RG	0	1.04005	0.559	0.268	0	0	IL2RG
RUNX3	0	1.03359	0.457	0.176	0	0	RUNX3
SAMD3	0	1.0157	0.373	0.096	0	0	SAMD3
SH2D1A	0	0.972832	0.323	0.092	0	0	SH2D1A
ZFP36L2	0	0.952788	0.918	0.799	0	0	ZFP36L2
SKAP1	0	0.946343	0.447	0.17	0	0	SKAP1
ARL4C	0	0.94274	0.717	0.426	0	0	ARL4C
HLA-A	0	0.919153	0.991	0.945	0	0	HLA-A
HLA-C	0	0.917528	0.985	0.93	0	0	HLA-C
TSC22D3	0	0.88849	0.867	0.737	0	0	TSC22D3
KLRD1	0	0.877488	0.253	0.068	0	0	KLRD1
ARHGDIB	0	0.865336	0.873	0.731	0	0	ARHGDIB
HLA-B	0	0.847192	0.996	0.942	0	0	HLA-B
LAT	0	0.847056	0.392	0.16	0	0	LAT
CXCR3	0	0.843298	0.296	0.095	0	0	CXCR3
SIT1	0	0.82886	0.293	0.094	0	0	SIT1
PRF1	0	0.775529	0.303	0.077	0	0	PRF1
BTG1	0	0.768619	0.968	0.879	0	0	BTG1
RPL28	0	0.696878	0.989	0.968	0	0	RPL28
B2M	0	0.67327	1	0.992	0	0	B2M
PFN1	0	0.666993	0.943	0.89	0	0	PFN1
TMSB4X	0	0.624074	0.993	0.973	0	0	TMSB4X
RPS29	0	0.622751	0.961	0.925	0	0	RPS29
RPS15A	0	0.573198	0.983	0.951	0	0	RPS15A
RPS3	0	0.559908	0.981	0.949	0	0	RPS3
RPS27	0	0.538384	0.981	0.956	0	0	RPS27
CD27	8.04114e-304	0.931806	0.304	0.105	2.69684e-299	0	CD27
SH3BGRL3	2.68795e-301	0.617653	0.951	0.875	9.01486e-297	0	SH3BGRL3
CD96	2.08691e-294	0.794155	0.344	0.128	6.99909e-290	0	CD96
MALAT1	5.66966e-291	0.32484	1	0.997	1.90149e-286	0	MALAT1
CD247	4.36237e-289	0.702443	0.402	0.164	1.46305e-284	0	CD247
STK17A	5.88195e-289	0.935226	0.629	0.413	1.97269e-284	0	STK17A
CLEC2D	9.2691e-274	0.814731	0.409	0.18	3.10867e-269	0	CLEC2D
ACAP1	3.33183e-269	0.828724	0.471	0.237	1.11743e-264	0	ACAP1
TBC1D10C	1.00186e-268	0.854621	0.392	0.173	3.36003e-264	0	TBC1D10C
MYL12A	3.11436e-268	0.626555	0.911	0.877	1.04449e-263	0	MYL12A
RPS26	7.9639e-265	0.46476	0.968	0.938	2.67093e-260	0	RPS26
EVL	3.8107e-264	0.897576	0.558	0.345	1.27803e-259	0	EVL
HLA-E	2.30806e-262	0.535023	0.942	0.889	7.74076e-258	0	HLA-E
PYHIN1	2.79776e-258	0.753691	0.277	0.096	9.38312e-254	0	PYHIN1
LCP1	2.41949e-255	0.790135	0.688	0.461	8.11448e-251	0	LCP1
MATK	3.92489e-253	0.691397	0.259	0.087	1.31633e-248	0	MATK
RPL23A	4.73203e-253	0.474599	0.96	0.934	1.58703e-248	0	RPL23A
CALM1	1.02323e-251	0.560462	0.942	0.925	3.43171e-247	0	CALM1
LEPROTL1	1.50635e-245	0.8671	0.619	0.434	5.052e-241	0	LEPROTL1
TAGAP	8.6182e-243	0.920305	0.541	0.328	2.89037e-238	0	TAGAP
ISG20	3.84674e-239	0.90116	0.518	0.298	1.29012e-234	0	ISG20
ETS1	4.49529e-239	0.815857	0.561	0.341	1.50763e-234	0	ETS1
ITM2C	8.00614e-237	1.03641	0.392	0.195	2.6851e-232	0	ITM2C
CYTIP	1.02301e-233	0.789812	0.65	0.44	3.43099e-229	0	CYTIP
TRAT1	1.37598e-229	0.764947	0.299	0.117	4.61475e-225	0	TRAT1
GBP5	1.1843e-228	0.848262	0.334	0.144	3.97191e-224	0	GBP5
PTPN7	1.2046e-228	0.824249	0.351	0.157	4.03998e-224	0	PTPN7
IKZF3	3.84585e-227	0.744092	0.277	0.104	1.28982e-222	0	IKZF3
RPL13	5.26553e-225	0.342688	0.989	0.975	1.76595e-220	0	RPL13
STK17B	1.60935e-222	0.770549	0.671	0.494	5.39744e-218	0	STK17B
RHOH	5.69062e-218	0.797174	0.465	0.247	1.90852e-213	0	RHOH
RPS7	2.56386e-213	0.374786	0.978	0.95	8.59867e-209	0	RPS7
RPS19	1.69228e-211	0.473736	0.976	0.954	5.67556e-207	0	RPS19
HOPX	1.9616e-211	0.762819	0.307	0.127	6.5788e-207	0	HOPX
RPS12	3.86623e-211	0.335623	0.986	0.967	1.29666e-206	0	RPS12
SPOCK2	6.3112e-211	0.679674	0.382	0.178	2.11665e-206	0	SPOCK2
KIAA1551	3.57784e-205	0.878766	0.544	0.371	1.19993e-200	0	KIAA1551
DDIT4	5.02246e-203	0.748601	0.714	0.56	1.68443e-198	0	DDIT4
GIMAP7	1.62783e-202	0.756941	0.625	0.398	5.45943e-198	0	GIMAP7
ALOX5AP	1.2186e-198	0.785815	0.531	0.323	4.08693e-194	0	ALOX5AP
RPL41	4.16121e-198	0.321834	0.992	0.979	1.39559e-193	0	RPL41
SRSF7	4.03567e-195	0.826	0.722	0.671	1.35348e-190	0	SRSF7
CD37	1.83702e-194	0.570765	0.688	0.488	6.16101e-190	0	CD37
RPSA	2.4547e-194	0.428033	0.938	0.901	8.23256e-190	0	RPSA
PSMB9	8.58273e-194	0.80691	0.642	0.533	2.87848e-189	0	PSMB9
HLA-F	6.86536e-189	0.821483	0.605	0.488	2.30251e-184	0	HLA-F
RPS14	1.37382e-188	0.321649	0.985	0.961	4.60751e-184	0	RPS14
RHOF	7.03433e-186	0.716316	0.322	0.152	2.35917e-181	0	RHOF
SEPT1	1.3881e-185	0.781863	0.389	0.212	4.65542e-181	0	SEPT1
RPLP2	7.7858e-183	0.330036	0.975	0.956	2.6112e-178	0	RPLP2
TNFSF9	1.48924e-182	1.0409	0.277	0.123	4.99461e-178	0	TNFSF9
RGCC	4.73336e-180	0.761689	0.675	0.471	1.58747e-175	0	RGCC
ARPC5L	5.47041e-180	0.853673	0.543	0.407	1.83467e-175	0	ARPC5L
EIF1	2.39259e-176	0.36509	0.972	0.958	8.02427e-172	0	EIF1
RPS15	1.37766e-173	0.324985	0.976	0.958	4.6204e-169	0	RPS15
TENT5C	7.2371e-173	0.740996	0.338	0.167	2.42718e-168	0	TENT5C
CD7	2.92914e-172	0.612408	0.355	0.171	9.82375e-168	0	CD7
STK4	1.45763e-171	0.661603	0.634	0.49	4.88859e-167	0	STK4
FYB1	1.42879e-170	0.652302	0.595	0.404	4.79187e-166	0	FYB1
CLEC2B	5.80893e-169	0.824456	0.573	0.427	1.9482e-164	0	CLEC2B
DUSP4	4.12078e-168	0.855815	0.261	0.115	1.38203e-163	0	DUSP4
PPP2R5C	2.07626e-166	0.83996	0.5	0.36	6.96336e-162	0	PPP2R5C
ITM2A	8.87182e-164	0.815882	0.513	0.332	2.97543e-159	0	ITM2A
RPL13A	6.4824e-161	0.408575	0.963	0.942	2.17407e-156	0	RPL13A
IRF1	3.23413e-159	0.659987	0.715	0.589	1.08466e-154	0	IRF1
RPS25	5.40652e-159	0.310821	0.977	0.95	1.81324e-154	0	RPS25
RPL14	1.65756e-157	0.327462	0.975	0.951	5.55911e-153	0	RPL14
OASL	1.88433e-157	0.696474	0.262	0.118	6.31968e-153	0	OASL
PRDM1	2.3213e-155	0.774637	0.427	0.259	7.78516e-151	0	PRDM1
ARAP2	3.96636e-155	0.672995	0.284	0.134	1.33024e-150	0	ARAP2
EZR	4.35432e-155	0.691048	0.625	0.478	1.46035e-150	0	EZR
SLA	2.96924e-154	0.814846	0.454	0.288	9.95823e-150	0	SLA
RPS2	5.17765e-154	0.314752	0.984	0.958	1.73648e-149	0	RPS2
SOCS1	6.24553e-154	0.706897	0.444	0.267	2.09462e-149	0	SOCS1
CD53	3.62122e-151	0.669759	0.571	0.422	1.21448e-146	0	CD53
CFL1	5.84601e-150	0.449662	0.899	0.881	1.96063e-145	0	CFL1
FYN	7.75797e-148	0.728111	0.386	0.231	2.60187e-143	0	FYN
EMB	8.50199e-146	0.702955	0.401	0.242	2.8514e-141	0	EMB
HSPA8	1.50443e-144	0.506139	0.862	0.835	5.04556e-140	0	HSPA8
RBM38	1.30483e-143	0.719934	0.352	0.198	4.37614e-139	0	RBM38
RPL30	1.52805e-143	0.26735	0.983	0.962	5.12477e-139	0	RPL30
TERF2IP	5.08506e-141	0.80607	0.631	0.604	1.70543e-136	0	TERF2IP
ITGB2	9.55901e-138	0.570966	0.586	0.404	3.2059e-133	0	ITGB2
PARP8	1.96553e-137	0.643481	0.268	0.131	6.59198e-133	0	PARP8
PSME1	2.3999e-137	0.589657	0.748	0.748	8.04878e-133	0	PSME1
ICAM3	5.62133e-137	0.680894	0.427	0.278	1.88528e-132	0	ICAM3
CYTOR	1.62077e-133	0.79788	0.429	0.296	5.43575e-129	0	CYTOR
LIMD2	6.23184e-130	0.670474	0.494	0.352	2.09003e-125	0	LIMD2
LYAR	4.53e-125	0.836369	0.364	0.235	1.51927e-120	0	LYAR
RGS1	1.899e-122	0.892957	0.458	0.307	6.36885e-118	0	RGS1
APOBEC3C	3.24334e-119	0.834295	0.33	0.203	1.08775e-114	0	APOBEC3C
GIMAP4	2.18859e-117	0.711006	0.498	0.367	7.3401e-113	0	GIMAP4
TNFAIP3	5.9331e-116	0.639632	0.487	0.341	1.98984e-111	0	TNFAIP3
APBB1IP	4.62454e-115	0.648537	0.472	0.349	1.55098e-110	0	APBB1IP
SARAF	3.42341e-114	0.452724	0.769	0.759	1.14814e-109	0	SARAF
GNG2	9.74236e-114	0.615956	0.278	0.151	3.26739e-109	0	GNG2
LSP1	1.25832e-112	0.574881	0.532	0.396	4.22017e-108	0	LSP1
GMFG	4.72041e-111	0.579301	0.633	0.534	1.58313e-106	0	GMFG
CDC42SE2	2.25001e-110	0.682998	0.426	0.306	7.54608e-106	0	CDC42SE2
IL7R	7.4055e-110	0.477188	0.46	0.274	2.48366e-105	0	IL7R
BIN2	8.63066e-110	0.64888	0.346	0.217	2.89455e-105	0	BIN2
SUB1	2.2694e-109	0.549534	0.718	0.729	7.61111e-105	0	SUB1
GPSM3	1.65933e-108	0.594773	0.527	0.418	5.56508e-104	0	GPSM3
ID2	3.68096e-108	0.854208	0.519	0.422	1.23452e-103	0	ID2
JUND	1.20594e-107	0.390562	0.919	0.916	4.04448e-103	0	JUND
RPL36AL	9.97264e-106	0.347461	0.886	0.892	3.34462e-101	0	RPL36AL
DNAJB1	1.49455e-102	0.690084	0.581	0.491	5.01243e-98	0	DNAJB1
CD44	1.14171e-100	0.497811	0.619	0.527	3.82907e-96	0	CD44
TXNIP	1.36981e-100	0.571049	0.786	0.751	4.59408e-96	0	TXNIP
TRAF3IP3	7.03549e-100	0.613887	0.311	0.185	2.35956e-95	0	TRAF3IP3
UBE2S	1.77854e-99	0.756513	0.492	0.412	5.96486e-95	0	UBE2S
RNF19A	5.12775e-99	0.709691	0.471	0.369	1.71974e-94	0	RNF19A
H3F3B	1.09068e-97	0.367788	0.972	0.962	3.65794e-93	0	H3F3B
PNRC1	7.13821e-97	0.356014	0.889	0.898	2.39401e-92	0	PNRC1
KLF6	1.09104e-96	0.491686	0.808	0.788	3.65913e-92	0	KLF6
ITGA4	3.98258e-95	0.616838	0.347	0.226	1.33568e-90	0	ITGA4
TMA7	1.01939e-94	0.448158	0.778	0.81	3.41884e-90	0	TMA7
RNF213	7.39308e-93	0.633976	0.5	0.423	2.47949e-88	0	RNF213
YWHAZ	5.27382e-92	0.487409	0.708	0.722	1.76873e-87	0	YWHAZ
C12orf75	1.15549e-90	0.323974	0.419	0.271	3.87527e-86	0	C12orf75
OCIAD2	4.82139e-90	0.618755	0.381	0.267	1.617e-85	0	OCIAD2
CYBA	1.98832e-88	0.273752	0.875	0.732	6.66842e-84	0	CYBA
LBH	2.42633e-88	0.574325	0.408	0.288	8.13744e-84	0	LBH
AES	1.70522e-86	0.579977	0.6	0.576	5.71896e-82	0	AES
EEF1D	7.46517e-86	0.331816	0.878	0.884	2.50367e-81	0	EEF1D
COTL1	7.65334e-81	0.535105	0.596	0.5	2.56678e-76	0	COTL1
ARPC2	5.01582e-79	0.359432	0.835	0.822	1.68221e-74	0	ARPC2
CKLF	2.60339e-75	0.65156	0.496	0.435	8.73125e-71	0	CKLF
EMP3	3.93518e-74	0.424796	0.73	0.685	1.31978e-69	0	EMP3
DOK2	4.84843e-74	0.57862	0.372	0.271	1.62607e-69	0	DOK2
MYL12B	7.91185e-72	0.324154	0.841	0.843	2.65348e-67	0	MYL12B
CASP8	3.88401e-70	0.543615	0.279	0.179	1.30262e-65	0	CASP8
RPS21	1.06856e-68	0.253918	0.908	0.908	3.58374e-64	0	RPS21
IKZF1	1.30916e-68	0.520094	0.319	0.216	4.39067e-64	0	IKZF1
MBP	1.4193e-68	0.566717	0.408	0.321	4.76004e-64	0	MBP
PIP4K2A	3.62416e-68	0.616097	0.383	0.303	1.21547e-63	0	PIP4K2A
CCND3	6.19366e-66	0.573463	0.387	0.306	2.07723e-61	0	CCND3
TNFAIP8	5.20406e-63	0.560261	0.4	0.317	1.74534e-58	0	TNFAIP8
DDX24	1.32573e-62	0.442252	0.678	0.717	4.44622e-58	0	DDX24
DDX5	2.44588e-62	0.339208	0.83	0.871	8.20298e-58	0	DDX5
EML4	2.45858e-61	0.516924	0.45	0.383	8.24559e-57	0	EML4
PIK3R1	2.86672e-60	0.661301	0.463	0.406	9.61441e-56	0	PIK3R1
IL10RA	3.97232e-60	0.574824	0.327	0.24	1.33224e-55	0	IL10RA
ORAI1	5.13078e-60	0.601422	0.324	0.243	1.72076e-55	0	ORAI1
SEPT7	9.9306e-58	0.344597	0.769	0.793	3.33053e-53	0	SEPT7
UBB	1.79773e-57	0.327797	0.836	0.859	6.02923e-53	0	UBB
SH3KBP1	8.10168e-57	0.590418	0.383	0.317	2.71714e-52	0	SH3KBP1
PDCD4	1.8314e-56	0.596248	0.444	0.394	6.14216e-52	0	PDCD4
CNOT6L	5.92907e-56	0.576702	0.36	0.282	1.98849e-51	0	CNOT6L
ABHD17A	6.8507e-54	0.577405	0.435	0.401	2.29759e-49	0	ABHD17A
IER2	1.49484e-53	0.34972	0.752	0.749	5.01339e-49	0	IER2
CDKN2D	9.06778e-53	0.523493	0.379	0.302	3.04115e-48	0	CDKN2D
PTGER4	4.86007e-51	0.528835	0.374	0.294	1.62997e-46	0	PTGER4
JAK1	2.1822e-50	0.461739	0.578	0.605	7.31866e-46	0	JAK1
CLIC1	4.07357e-49	0.299581	0.832	0.827	1.3662e-44	0	CLIC1
ABRACL	1.59621e-48	0.513301	0.451	0.411	5.35338e-44	0	ABRACL
SYNE2	2.75707e-48	0.400747	0.403	0.322	9.24667e-44	0	SYNE2
RORA	4.46149e-48	0.457483	0.325	0.24	1.49629e-43	0	RORA
SSR2	1.93183e-47	0.413865	0.636	0.692	6.47897e-43	0	SSR2
RPL27A	2.35083e-47	0.281079	0.849	0.874	7.88422e-43	0	RPL27A
TGFB1	3.89087e-46	0.521688	0.48	0.466	1.30492e-41	0	TGFB1
RSRP1	5.12878e-45	0.445038	0.563	0.57	1.72009e-40	0	RSRP1
TOB1	9.01755e-45	0.692275	0.4	0.354	3.0243e-40	0	TOB1
CD99	2.94935e-44	0.335985	0.756	0.77	9.89154e-40	0	CD99
HNRNPDL	4.76217e-44	0.332852	0.711	0.776	1.59714e-39	0	HNRNPDL
VAMP2	8.53978e-44	0.504536	0.519	0.53	2.86407e-39	0	VAMP2
RPS4Y1	2.24513e-43	0.289398	0.752	0.732	7.52973e-39	0	RPS4Y1
SYNRG	2.83784e-42	0.511593	0.285	0.218	9.51755e-38	0	SYNRG
ANXA1	5.44425e-42	0.303157	0.851	0.83	1.82589e-37	0	ANXA1
ARHGEF1	9.17698e-42	0.479261	0.291	0.224	3.07778e-37	0	ARHGEF1
SNRPD2	7.78467e-41	0.391916	0.63	0.688	2.61082e-36	0	SNRPD2
CHST12	3.13734e-40	0.495308	0.266	0.202	1.0522e-35	0	CHST12
CNN2	3.55896e-40	0.530333	0.331	0.277	1.1936e-35	0	CNN2
C9orf78	1.13193e-39	0.552532	0.461	0.461	3.79626e-35	0	C9orf78
ARF6	7.82704e-39	0.528676	0.423	0.4	2.62503e-34	0	ARF6
H2AFZ	6.50821e-38	0.433771	0.684	0.736	2.18272e-33	0	H2AFZ
GPR65	7.92362e-38	0.454361	0.291	0.224	2.65742e-33	0	GPR65
KIF2A	1.44449e-37	0.525208	0.346	0.297	4.84455e-33	0	KIF2A
IQGAP2	2.34741e-36	0.475219	0.327	0.265	7.87274e-32	0	IQGAP2
TSTD1	4.79312e-36	0.499744	0.321	0.264	1.60752e-31	0	TSTD1
PTP4A2	1.34378e-35	0.51377	0.475	0.492	4.50678e-31	0	PTP4A2
CTSC	1.76367e-35	0.28931	0.529	0.476	5.915e-31	0	CTSC
NCL	1.79286e-35	0.342361	0.742	0.8	6.0129e-31	0	NCL
ADGRE5	1.82006e-35	0.454211	0.319	0.261	6.10412e-31	0	ADGRE5
JMJD6	2.14992e-34	0.555912	0.264	0.21	7.2104e-30	0	JMJD6
SLFN5	2.92931e-34	0.480285	0.293	0.235	9.82433e-30	0	SLFN5
RBM8A	8.97385e-33	0.423465	0.575	0.632	3.00965e-28	0	RBM8A
PPP1R2	1.53434e-32	0.50928	0.48	0.488	5.14588e-28	0	PPP1R2
PAXX	2.35119e-32	0.539313	0.348	0.315	7.88542e-28	0	PAXX
UBALD2	3.07058e-31	0.437408	0.464	0.458	1.02981e-26	0	UBALD2
HINT1	9.70879e-30	0.255781	0.758	0.806	3.25614e-25	0	HINT1
SAMSN1	4.33541e-29	0.273669	0.408	0.339	1.45401e-24	0	SAMSN1
PLP2	5.22615e-29	0.534487	0.47	0.478	1.75275e-24	0	PLP2
ATP5MG	7.16631e-29	0.26097	0.731	0.797	2.40344e-24	0	ATP5MG
ELF1	2.62893e-28	0.412804	0.539	0.557	8.81692e-24	0	ELF1
CRYBG1	2.65991e-28	0.324748	0.281	0.22	8.92082e-24	0	CRYBG1
CIB1	4.26659e-28	0.431694	0.53	0.576	1.43093e-23	0	CIB1
DNAJA1	7.38422e-28	0.418852	0.661	0.716	2.47652e-23	0	DNAJA1
SEPT6	3.15508e-27	0.456044	0.334	0.295	1.05815e-22	0	SEPT6
PDE4B	2.13937e-26	0.450942	0.32	0.273	7.17503e-22	0	PDE4B
PPP1CA	2.36405e-26	0.497008	0.416	0.424	7.92855e-22	0	PPP1CA
SRSF2	3.22223e-25	0.455331	0.492	0.53	1.08067e-20	0	SRSF2
IDH2	5.78019e-25	0.50087	0.268	0.231	1.93856e-20	0	IDH2
EVI2B	1.94424e-24	0.400726	0.381	0.342	6.52059e-20	0	EVI2B
GYPC	7.56359e-24	0.413088	0.478	0.485	2.53668e-19	0	GYPC
PSME2	9.71814e-24	0.394765	0.544	0.584	3.25927e-19	0	PSME2
HIGD2A	1.82757e-23	0.415585	0.536	0.591	6.12931e-19	0	HIGD2A
CDK2AP2	2.00166e-23	0.516869	0.354	0.342	6.71317e-19	0	CDK2AP2
BRD2	5.31635e-23	0.503846	0.414	0.415	1.783e-18	0	BRD2
LY6E	1.216e-22	0.316071	0.532	0.538	4.07822e-18	0	LY6E
BTN3A2	3.8492e-22	0.474372	0.251	0.212	1.29094e-17	0	BTN3A2
KLF13	1.02344e-21	0.478343	0.378	0.375	3.43241e-17	0	KLF13
RBM39	1.68403e-21	0.300787	0.626	0.708	5.64791e-17	0	RBM39
TRIR	3.58489e-20	0.344723	0.585	0.681	1.2023e-15	0	TRIR
C12orf57	9.86314e-20	0.267498	0.611	0.614	3.3079e-15	0	C12orf57
PPP1R18	3.79183e-19	0.490869	0.333	0.323	1.2717e-14	0	PPP1R18
BUB3	1.13229e-18	0.47491	0.344	0.339	3.79749e-14	0	BUB3
CSK	1.13863e-18	0.436043	0.266	0.236	3.81874e-14	0	CSK
GCC2	1.58898e-18	0.463717	0.417	0.43	5.32913e-14	0	GCC2
KMT2E	4.71694e-18	0.349724	0.518	0.572	1.58197e-13	0	KMT2E
PIK3IP1	1.80461e-17	0.339197	0.263	0.224	6.05231e-13	0	PIK3IP1
GTF3A	3.40888e-17	0.450494	0.45	0.494	1.14327e-12	0	GTF3A
CMC1	7.86602e-17	0.600733	0.282	0.267	2.6381e-12	0	CMC1
PSMA7	2.66606e-16	0.274175	0.705	0.766	8.94145e-12	0	PSMA7
SET	6.29219e-16	0.289288	0.634	0.719	2.11027e-11	0	SET
OPTN	7.92865e-16	0.41029	0.323	0.308	2.65911e-11	0	OPTN
GSTK1	1.03378e-15	0.339323	0.519	0.582	3.4671e-11	0	GSTK1
GIMAP1	2.56095e-15	0.398025	0.261	0.23	8.58892e-11	0	GIMAP1
DNAJC1	6.15958e-15	0.49936	0.344	0.352	2.0658e-10	0	DNAJC1
TSPYL2	7.75256e-15	0.427341	0.261	0.232	2.60005e-10	0	TSPYL2
APRT	8.6041e-15	0.307182	0.549	0.626	2.88564e-10	0	APRT
FUS	1.13163e-14	0.292556	0.583	0.672	3.79525e-10	0	FUS
ATP5IF1	1.70103e-14	0.357731	0.536	0.622	5.70492e-10	0	ATP5IF1
GTF2B	2.59749e-14	0.435256	0.389	0.396	8.71145e-10	0	GTF2B
ANKRD12	3.79393e-14	0.283916	0.557	0.626	1.27241e-09	0	ANKRD12
WIPF1	5.08448e-14	0.415542	0.287	0.272	1.70523e-09	0	WIPF1
RSBN1	6.76939e-14	0.387971	0.276	0.252	2.27032e-09	0	RSBN1
HCLS1	7.20898e-14	0.33784	0.346	0.331	2.41775e-09	0	HCLS1
EIF5	8.77382e-13	0.318662	0.54	0.615	2.94256e-08	0	EIF5
FAM49B	1.31107e-12	0.308891	0.364	0.355	4.39707e-08	0	FAM49B
PPDPF	2.66435e-11	0.280317	0.592	0.655	8.9357e-07	0	PPDPF
PRPF38B	2.79026e-11	0.422845	0.394	0.424	9.35797e-07	0	PRPF38B
SIGIRR	6.91332e-11	0.41918	0.344	0.36	2.31859e-06	0	SIGIRR
YPEL5	7.70897e-11	0.375575	0.445	0.493	2.58543e-06	0	YPEL5
SMCHD1	9.77932e-11	0.297835	0.383	0.395	3.27979e-06	0	SMCHD1
DOCK8	4.01271e-10	0.34211	0.266	0.249	1.34578e-05	0	DOCK8
SNRPB	4.25266e-10	0.324818	0.475	0.55	1.42626e-05	0	SNRPB
CRIP1	5.63198e-10	0.295876	0.381	0.377	1.88885e-05	0	CRIP1
JPT1	1.23409e-09	0.390857	0.364	0.381	4.13888e-05	0	JPT1
AMD1	1.67069e-09	0.438573	0.4	0.437	5.60315e-05	0	AMD1
UBE2D2	2.02182e-09	0.315444	0.503	0.597	6.78077e-05	0	UBE2D2
CCSER2	1.73876e-08	0.373856	0.308	0.312	0.000583145	0	CCSER2
TAF1D	3.67121e-08	0.319717	0.456	0.516	0.00123125	0	TAF1D
CMC2	3.86481e-08	0.39504	0.267	0.269	0.00129618	0	CMC2
MZT2A	9.53042e-08	0.394421	0.359	0.391	0.00319631	0	MZT2A
CCND2	9.69658e-08	0.339116	0.29	0.288	0.00325204	0	CCND2
ANXA6	1.7299e-07	0.348098	0.258	0.255	0.00580172	0	ANXA6
FNBP1	2.11472e-07	0.362553	0.303	0.312	0.00709236	0	FNBP1
CDKN1B	3.53895e-07	0.323884	0.337	0.355	0.0118689	0	CDKN1B
DDX6	4.27654e-07	0.363944	0.35	0.38	0.0143426	0	DDX6
RBM25	4.96061e-07	0.31536	0.496	0.589	0.0166369	0	RBM25
UCP2	6.11482e-07	0.281961	0.31	0.304	0.0205079	0	UCP2
RAP1B	6.25786e-07	0.286579	0.508	0.607	0.0209876	0	RAP1B
PRR13	7.18074e-07	0.312662	0.432	0.493	0.0240828	0	PRR13
SRRM1	9.62308e-07	0.263524	0.561	0.675	0.0322739	0	SRRM1
SRSF3	9.69183e-07	0.312698	0.529	0.63	0.0325044	0	SRSF3
CITED2	1.17199e-06	0.415222	0.363	0.381	0.0393061	0	CITED2
ERP29	1.89746e-06	0.267108	0.512	0.612	0.063637	0	ERP29
RSRC2	6.56278e-06	0.328363	0.463	0.541	0.220102	0	RSRC2
BTG3	7.07482e-06	0.408778	0.315	0.336	0.237275	0	BTG3
EPC1	9.05038e-06	0.342567	0.334	0.358	0.303532	0	EPC1
DRAP1	1.32848e-05	0.347974	0.419	0.491	0.445547	0	DRAP1
SP100	1.38208e-05	0.315971	0.445	0.522	0.463523	0	SP100
CLDND1	2.04619e-05	0.473418	0.288	0.31	0.686252	0	CLDND1
CASP4	5.01621e-05	0.387094	0.34	0.379	1	0	CASP4
PAIP2	6.08249e-05	0.335614	0.425	0.506	1	0	PAIP2
NCOR1	0.000119739	0.33655	0.395	0.459	1	0	NCOR1
CAPZA1	0.000123696	0.312172	0.38	0.435	1	0	CAPZA1
FGFR1OP2	0.000127268	0.386906	0.351	0.399	1	0	FGFR1OP2
CDC42SE1	0.000170517	0.309592	0.318	0.345	1	0	CDC42SE1
GPBP1	0.000182908	0.294652	0.423	0.492	1	0	GPBP1
KANSL1	0.000409048	0.334188	0.264	0.277	1	0	KANSL1
GLIPR2	0.000596364	0.313439	0.272	0.284	1	0	GLIPR2
HNRNPF	0.000701525	0.27487	0.458	0.549	1	0	HNRNPF
RAB8B	0.00150863	0.378039	0.29	0.317	1	0	RAB8B
MAP2K2	0.00151302	0.380049	0.369	0.443	1	0	MAP2K2
HNRNPH1	0.00190426	0.277164	0.478	0.575	1	0	HNRNPH1
HNRNPC	0.00258667	0.269244	0.474	0.577	1	0	HNRNPC
G3BP2	0.00348419	0.342469	0.372	0.431	1	0	G3BP2
REST	0.00364287	0.343313	0.29	0.319	1	0	REST
YY1	0.00444963	0.288174	0.457	0.557	1	0	YY1
ZC3HAV1	0.00572844	0.265658	0.264	0.277	1	0	ZC3HAV1
TAPBP	0.00598175	0.338672	0.361	0.422	1	0	TAPBP
PSMB8	0.00846512	0.294269	0.424	0.508	1	0	PSMB8
C1QB	0	4.7409	0.97	0.084	0	1	C1QB
C1QA	0	4.6394	0.979	0.089	0	1	C1QA
C1QC	0	4.59718	0.984	0.069	0	1	C1QC
SELENOP	0	3.67773	0.828	0.223	0	1	SELENOP
CCL3	0	3.45232	0.872	0.206	0	1	CCL3
HLA-DPA1	0	3.34326	0.996	0.541	0	1	HLA-DPA1
HLA-DRA	0	3.30826	0.998	0.499	0	1	HLA-DRA
HLA-DRB1	0	3.21103	0.999	0.585	0	1	HLA-DRB1
HLA-DQA1	0	3.18044	0.97	0.243	0	1	HLA-DQA1
FOLR2	0	3.12314	0.833	0.038	0	1	FOLR2
PLTP	0	3.10057	0.889	0.151	0	1	PLTP
HLA-DPB1	0	3.06222	0.994	0.507	0	1	HLA-DPB1
CD14	0	3.06108	0.988	0.202	0	1	CD14
CCL3L1	0	3.02513	0.68	0.097	0	1	CCL3L1
HLA-DRB5	0	2.93277	0.994	0.408	0	1	HLA-DRB5
MS4A6A	0	2.91358	0.972	0.114	0	1	MS4A6A
F13A1	0	2.88063	0.804	0.059	0	1	F13A1
CD74	0	2.82837	1	0.716	0	1	CD74
MS4A7	0	2.70536	0.964	0.122	0	1	MS4A7
FCGR3A	0	2.62133	0.917	0.136	0	1	FCGR3A
APOE	0	2.61293	0.615	0.193	0	1	APOE
HLA-DQB1	0	2.60374	0.979	0.298	0	1	HLA-DQB1
HLA-DMA	0	2.53817	0.978	0.3	0	1	HLA-DMA
CCL4L21	0	2.50871	0.71	0.239	0	1	CCL4L2
MS4A4A	0	2.50776	0.866	0.077	0	1	MS4A4A
AIF1	0	2.5044	0.991	0.191	0	1	AIF1
TMEM176B	0	2.46609	0.934	0.123	0	1	TMEM176B
FCGR2A	0	2.41774	0.948	0.126	0	1	FCGR2A
MRC1	0	2.3825	0.75	0.059	0	1	MRC1
FCGR1A	0	2.29458	0.837	0.081	0	1	FCGR1A
TYROBP	0	2.26409	0.997	0.245	0	1	TYROBP
FCER1G	0	2.26361	0.993	0.218	0	1	FCER1G
IGSF6	0	2.21189	0.897	0.113	0	1	IGSF6
LGMN	0	2.16211	0.747	0.164	0	1	LGMN
CH25H	0	2.15772	0.422	0.044	0	1	CH25H
CCL8	0	2.14152	0.305	0.018	0	1	CCL8
SGK1	0	2.11348	0.935	0.24	0	1	SGK1
RNASE1	0	2.08293	0.563	0.233	0	1	RNASE1
FTL	0	2.05254	1	0.966	0	1	FTL
MAFB	0	2.05005	0.926	0.22	0	1	MAFB
CTSZ	0	2.0464	0.971	0.44	0	1	CTSZ
MSR1	0	2.01863	0.867	0.092	0	1	MSR1
CPVL	0	2.00004	0.869	0.143	0	1	CPVL
C3AR1	0	1.96548	0.879	0.093	0	1	C3AR1
CD163	0	1.96326	0.802	0.096	0	1	CD163
VSIG4	0	1.95304	0.796	0.069	0	1	VSIG4
FCGRT	0	1.94842	0.972	0.392	0	1	FCGRT
HLA-DMB	0	1.94324	0.926	0.162	0	1	HLA-DMB
SAT1	0	1.93301	0.998	0.655	0	1	SAT1
C5AR1	0	1.9261	0.923	0.133	0	1	C5AR1
CTSB	0	1.90618	0.98	0.361	0	1	CTSB
CD68	0	1.89959	0.969	0.203	0	1	CD68
CEBPD	0	1.87575	0.992	0.498	0	1	CEBPD
CYBB	0	1.87531	0.895	0.129	0	1	CYBB
CST3	0	1.86782	0.999	0.573	0	1	CST3
TMEM176A	0	1.86036	0.846	0.092	0	1	TMEM176A
NPC2	0	1.82395	0.993	0.537	0	1	NPC2
HMOX1	0	1.80741	0.817	0.152	0	1	HMOX1
DAB2	0	1.79671	0.835	0.209	0	1	DAB2
CTSS	0	1.79555	0.981	0.371	0	1	CTSS
GPR34	0	1.79153	0.759	0.027	0	1	GPR34
HSPA1A	0	1.77031	0.899	0.55	0	1	HSPA1A
CD83	0	1.74935	0.919	0.229	0	1	CD83
GRN	0	1.7105	0.955	0.342	0	1	GRN
MARCKS	0	1.68477	0.963	0.359	0	1	MARCKS
IER3	0	1.68084	0.927	0.373	0	1	IER3
HLA-DQA2	0	1.66609	0.352	0.109	0	1	HLA-DQA2
VMO1	0	1.65882	0.621	0.053	0	1	VMO1
PSAP	0	1.63904	0.987	0.534	0	1	PSAP
CTSC1	0	1.62722	0.949	0.445	0	1	CTSC
PLEK	0	1.59591	0.9	0.217	0	1	PLEK
APOC1	0	1.57978	0.513	0.109	0	1	APOC1
CXCL3	0	1.57246	0.475	0.109	0	1	CXCL3
OTUD1	0	1.5671	0.691	0.146	0	1	OTUD1
CTSD	0	1.55935	0.943	0.505	0	1	CTSD
INSIG1	0	1.54578	0.68	0.206	0	1	INSIG1
CSF1R	0	1.54147	0.786	0.08	0	1	CSF1R
FGL2	0	1.52956	0.835	0.24	0	1	FGL2
GLUL	0	1.51238	0.939	0.364	0	1	GLUL
CXCL16	0	1.51006	0.845	0.145	0	1	CXCL16
RASSF4	0	1.49415	0.796	0.101	0	1	RASSF4
SPI1	0	1.47882	0.883	0.146	0	1	SPI1
GPR183	0	1.47005	0.828	0.352	0	1	GPR183
RGS2	0	1.44654	0.84	0.282	0	1	RGS2
PLAUR	0	1.43477	0.852	0.233	0	1	PLAUR
MNDA	0	1.43378	0.878	0.138	0	1	MNDA
CLEC7A	0	1.43201	0.803	0.109	0	1	CLEC7A
MFSD1	0	1.42671	0.849	0.188	0	1	MFSD1
IL1B	0	1.42315	0.486	0.09	0	1	IL1B
SLC40A1	0	1.40015	0.58	0.148	0	1	SLC40A1
ADAP2	0	1.38811	0.785	0.089	0	1	ADAP2
LYZ	0	1.38772	0.931	0.192	0	1	LYZ
CTSL	0	1.38085	0.874	0.315	0	1	CTSL
VAMP8	0	1.36529	0.951	0.384	0	1	VAMP8
CXCL8	0	1.35058	0.532	0.124	0	1	CXCL8
NAMPT	0	1.34597	0.927	0.4	0	1	NAMPT
RNASE6	0	1.33645	0.761	0.102	0	1	RNASE6
LY86	0	1.32048	0.77	0.109	0	1	LY86
BLVRB	0	1.31824	0.865	0.332	0	1	BLVRB
FTH1	0	1.31309	1	0.975	0	1	FTH1
RNF130	0	1.3076	0.897	0.284	0	1	RNF130
ASAH1	0	1.29677	0.883	0.344	0	1	ASAH1
TNFSF13B	0	1.2954	0.78	0.137	0	1	TNFSF13B
CTSH	0	1.28783	0.873	0.271	0	1	CTSH
CYBA1	0	1.28736	0.995	0.723	0	1	CYBA
STAB1	0	1.28009	0.575	0.076	0	1	STAB1
TFRC	0	1.2776	0.564	0.127	0	1	TFRC
PILRA	0	1.26083	0.751	0.1	0	1	PILRA
LILRB4	0	1.25814	0.726	0.099	0	1	LILRB4
CEBPB	0	1.25665	0.926	0.447	0	1	CEBPB
PDK4	0	1.24264	0.372	0.131	0	1	PDK4
P2RY13	0	1.22628	0.554	0.038	0	1	P2RY13
TYMP	0	1.2241	0.922	0.353	0	1	TYMP
SLCO2B1	0	1.21426	0.616	0.03	0	1	SLCO2B1
LITAF	0	1.21217	0.897	0.45	0	1	LITAF
RNASET2	0	1.212	0.94	0.385	0	1	RNASET2
HSPA1B	0	1.21017	0.755	0.4	0	1	HSPA1B
SERPINA1	0	1.20775	0.741	0.109	0	1	SERPINA1
ATF3	0	1.19443	0.86	0.361	0	1	ATF3
KLF4	0	1.18904	0.811	0.265	0	1	KLF4
CAPG	0	1.18435	0.746	0.257	0	1	CAPG
FCGR2B	0	1.18345	0.514	0.082	0	1	FCGR2B
LY96	0	1.18189	0.799	0.216	0	1	LY96
RGS10	0	1.18047	0.912	0.377	0	1	RGS10
FCGR1B	0	1.17981	0.579	0.036	0	1	FCGR1B
NCF4	0	1.17726	0.789	0.14	0	1	NCF4
LAIR1	0	1.17186	0.761	0.114	0	1	LAIR1
ZNF331	0	1.16923	0.741	0.347	0	1	ZNF331
SDS	0	1.15338	0.393	0.043	0	1	SDS
LST1	0	1.14356	0.832	0.152	0	1	LST1
ARHGAP18	0	1.1343	0.867	0.261	0	1	ARHGAP18
DBI	0	1.13272	0.924	0.569	0	1	DBI
CD86	0	1.12848	0.742	0.102	0	1	CD86
IL18	0	1.12184	0.683	0.086	0	1	IL18
PYCARD	0	1.12174	0.888	0.321	0	1	PYCARD
HERPUD1	0	1.12073	0.93	0.618	0	1	HERPUD1
CXCL2	0	1.11701	0.525	0.153	0	1	CXCL2
TREM2	0	1.10747	0.453	0.042	0	1	TREM2
PPT1	0	1.10342	0.826	0.242	0	1	PPT1
CREG1	0	1.10332	0.764	0.235	0	1	CREG1
NR4A3	0	1.09857	0.552	0.104	0	1	NR4A3
RAB32	0	1.09776	0.766	0.209	0	1	RAB32
GPNMB	0	1.09305	0.527	0.175	0	1	GPNMB
CHMP1B	0	1.09213	0.682	0.275	0	1	CHMP1B
CCL41	0	1.0889	0.819	0.43	0	1	CCL4
ITM2B	0	1.08242	0.996	0.897	0	1	ITM2B
THBD	0	1.07853	0.679	0.231	0	1	THBD
SOD2	0	1.07751	0.824	0.36	0	1	SOD2
CPM	0	1.07687	0.59	0.062	0	1	CPM
NR4A2	0	1.05079	0.851	0.388	0	1	NR4A2
RB1	0	1.04828	0.732	0.179	0	1	RB1
ATP6V0B	0	1.04587	0.947	0.523	0	1	ATP6V0B
RASGEF1B	0	1.04579	0.753	0.202	0	1	RASGEF1B
PLD3	0	1.04203	0.744	0.266	0	1	PLD3
PLAU	0	1.0349	0.473	0.046	0	1	PLAU
TBXAS1	0	1.03422	0.69	0.092	0	1	TBXAS1
AKR1B1	0	1.02621	0.721	0.184	0	1	AKR1B1
LAPTM5	0	1.01286	0.963	0.482	0	1	LAPTM5
ACP5	0	1.00995	0.455	0.114	0	1	ACP5
RAB20	0	1.00912	0.658	0.116	0	1	RAB20
NAGK	0	1.00666	0.791	0.25	0	1	NAGK
HSP90AA1	0	1.00553	0.989	0.876	0	1	HSP90AA1
BRI3	0	1.00058	0.948	0.527	0	1	BRI3
HBEGF	0	0.995751	0.542	0.137	0	1	HBEGF
IGSF21	0	0.993619	0.467	0.009	0	1	IGSF21
SLC1A3	0	0.990124	0.492	0.032	0	1	SLC1A3
LAP3	0	0.987594	0.834	0.337	0	1	LAP3
TUBA1B	0	0.983797	0.969	0.751	0	1	TUBA1B
TGFBI	0	0.972104	0.602	0.121	0	1	TGFBI
LIPA	0	0.96779	0.63	0.167	0	1	LIPA
C1orf162	0	0.966742	0.732	0.185	0	1	C1orf162
HNMT	0	0.959285	0.712	0.158	0	1	HNMT
C2	0	0.952716	0.413	0.026	0	1	C2
SNX6	0	0.952046	0.896	0.477	0	1	SNX6
NINJ1	0	0.951344	0.78	0.261	0	1	NINJ1
NRP2	0	0.942884	0.646	0.134	0	1	NRP2
FUCA1	0	0.940127	0.575	0.11	0	1	FUCA1
LYN	0	0.928972	0.719	0.158	0	1	LYN
2023-03-01	0	0.920846	0.604	0.075	0	1	2023-03-01
PTPRE	0	0.913425	0.776	0.25	0	1	PTPRE
ATP1B3	0	0.906833	0.786	0.382	0	1	ATP1B3
IFI30	0	0.906164	0.651	0.138	0	1	IFI30
IFNGR1	0	0.904818	0.866	0.423	0	1	IFNGR1
FPR1	0	0.899414	0.609	0.082	0	1	FPR1
FPR3	0	0.898165	0.545	0.042	0	1	FPR3
CD63	0	0.893467	0.99	0.694	0	1	CD63
CCL2	0	0.892883	0.57	0.222	0	1	CCL2
PHACTR1	0	0.89009	0.622	0.147	0	1	PHACTR1
AKR1A1	0	0.886316	0.81	0.346	0	1	AKR1A1
GADD45B	0	0.877161	0.954	0.617	0	1	GADD45B
GK	0	0.870608	0.599	0.122	0	1	GK
BMP2K	0	0.868312	0.606	0.098	0	1	BMP2K
ADAMDEC1	0	0.866946	0.293	0.013	0	1	ADAMDEC1
OGFRL1	0	0.86215	0.596	0.117	0	1	OGFRL1
CXorf21	0	0.861162	0.414	0.054	0	1	CXorf21
EIF4A3	0	0.861101	0.681	0.337	0	1	EIF4A3
DSE	0	0.858673	0.645	0.132	0	1	DSE
MPEG1	0	0.857992	0.518	0.063	0	1	MPEG1
BHLHE41	0	0.855548	0.443	0.077	0	1	BHLHE41
HSPH1	0	0.855127	0.609	0.23	0	1	HSPH1
SLAMF8	0	0.854124	0.516	0.044	0	1	SLAMF8
YWHAH	0	0.853423	0.818	0.421	0	1	YWHAH
PLIN2	0	0.851688	0.728	0.335	0	1	PLIN2
CD84	0	0.850255	0.651	0.128	0	1	CD84
ARPC3	0	0.848659	0.979	0.792	0	1	ARPC3
EPB41L3	0	0.846865	0.61	0.107	0	1	EPB41L3
ZFAND5	0	0.846161	0.768	0.411	0	1	ZFAND5
RHOB	0	0.837836	0.761	0.327	0	1	RHOB
TIMP2	0	0.82934	0.875	0.363	0	1	TIMP2
SDCBP	0	0.828618	0.941	0.564	0	1	SDCBP
RGS11	0	0.82846	0.767	0.284	0	1	RGS1
RNF13	0	0.828203	0.813	0.319	0	1	RNF13
KCTD12	0	0.823547	0.59	0.145	0	1	KCTD12
PLSCR1	0	0.82082	0.791	0.337	0	1	PLSCR1
ITGB21	0	0.820096	0.923	0.38	0	1	ITGB2
ARRB2	0	0.815758	0.77	0.209	0	1	ARRB2
RAC1	0	0.813716	0.972	0.675	0	1	RAC1
SHTN1	0	0.811995	0.577	0.094	0	1	SHTN1
QKI	0	0.81149	0.83	0.342	0	1	QKI
CD302	0	0.80691	0.674	0.176	0	1	CD302
METRNL	0	0.806083	0.843	0.372	0	1	METRNL
LAMP2	0	0.80521	0.748	0.258	0	1	LAMP2
DSC2	0	0.802789	0.516	0.041	0	1	DSC2
HCK	0	0.801457	0.591	0.078	0	1	HCK
IER5	0	0.80026	0.667	0.255	0	1	IER5
TLR2	0	0.798273	0.545	0.078	0	1	TLR2
NPL	0	0.790792	0.541	0.079	0	1	NPL
OLR1	0	0.788708	0.458	0.083	0	1	OLR1
FCHO2	0	0.774653	0.596	0.139	0	1	FCHO2
RBPJ	0	0.77406	0.759	0.331	0	1	RBPJ
LINC01094	0	0.773829	0.447	0.028	0	1	LINC01094
ATP6V1B2	0	0.773473	0.618	0.151	0	1	ATP6V1B2
NLRP3	0	0.77298	0.387	0.057	0	1	NLRP3
LILRB5	0	0.77243	0.307	0.007	0	1	LILRB5
SRGN	0	0.771527	0.99	0.76	0	1	SRGN
TNFAIP2	0	0.77121	0.527	0.115	0	1	TNFAIP2
HAVCR2	0	0.770335	0.564	0.093	0	1	HAVCR2
MAF	0	0.769872	0.616	0.17	0	1	MAF
KCNMA1	0	0.769709	0.511	0.076	0	1	KCNMA1
GAA	0	0.769465	0.616	0.144	0	1	GAA
S100A11	0	0.768296	0.987	0.798	0	1	S100A11
IQGAP21	0	0.767437	0.74	0.234	0	1	IQGAP2
IGF1	0	0.767236	0.428	0.035	0	1	IGF1
DRAM2	0	0.763626	0.696	0.199	0	1	DRAM2
ZFP36L1	0	0.761049	0.946	0.642	0	1	ZFP36L1
LPAR6	0	0.760901	0.652	0.192	0	1	LPAR6
CD4	0	0.759196	0.614	0.114	0	1	CD4
SNX2	0	0.756469	0.797	0.338	0	1	SNX2
UNC93B1	0	0.75442	0.582	0.12	0	1	UNC93B1
BNIP3L	0	0.750466	0.829	0.406	0	1	BNIP3L
EMILIN2	0	0.749048	0.587	0.118	0	1	EMILIN2
TMEM37	0	0.746217	0.461	0.024	0	1	TMEM37
CLEC10A	0	0.745544	0.351	0.041	0	1	CLEC10A
MTSS1	0	0.745479	0.529	0.111	0	1	MTSS1
PLEKHO1	0	0.745189	0.745	0.266	0	1	PLEKHO1
SLC8A1	0	0.743457	0.548	0.093	0	1	SLC8A1
AOAH	0	0.7432	0.558	0.103	0	1	AOAH
LILRB2	0	0.740365	0.514	0.067	0	1	LILRB2
IFNGR2	0	0.739995	0.693	0.224	0	1	IFNGR2
PLBD1	0	0.73887	0.611	0.118	0	1	PLBD1
SPRED1	0	0.736106	0.472	0.073	0	1	SPRED1
RBM47	0	0.729172	0.505	0.065	0	1	RBM47
UCP21	0	0.728306	0.763	0.27	0	1	UCP2
SCAMP2	0	0.72431	0.755	0.275	0	1	SCAMP2
IRF8	0	0.719174	0.547	0.103	0	1	IRF8
NAIP	0	0.718832	0.502	0.073	0	1	NAIP
SLC7A7	0	0.716806	0.537	0.078	0	1	SLC7A7
GRB2	0	0.712631	0.883	0.444	0	1	GRB2
ATP6V1F	0	0.705994	0.878	0.521	0	1	ATP6V1F
FRMD4B	0	0.704811	0.729	0.24	0	1	FRMD4B
ATP6AP2	0	0.701314	0.867	0.484	0	1	ATP6AP2
VMP1	0	0.69615	0.782	0.372	0	1	VMP1
NCOA4	0	0.695472	0.663	0.206	0	1	NCOA4
ARPC5	0	0.691888	0.95	0.655	0	1	ARPC5
SAP30	0	0.689666	0.577	0.253	0	1	SAP30
CD72	0	0.686011	0.427	0.036	0	1	CD72
HEXA	0	0.6855	0.672	0.231	0	1	HEXA
FAM49B1	0	0.684952	0.803	0.323	0	1	FAM49B
GCA	0	0.683722	0.638	0.168	0	1	GCA
UGCG	0	0.681984	0.59	0.205	0	1	UGCG
LPCAT2	0	0.681283	0.528	0.124	0	1	LPCAT2
SYNGR2	0	0.680235	0.757	0.298	0	1	SYNGR2
ANXA5	0	0.679385	0.946	0.593	0	1	ANXA5
TSPAN4	0	0.679288	0.635	0.235	0	1	TSPAN4
RAB31	0	0.676664	0.664	0.197	0	1	RAB31
NRP1	0	0.676614	0.565	0.188	0	1	NRP1
HLA-DOA	0	0.674383	0.451	0.04	0	1	HLA-DOA
GNAI2	0	0.674139	0.948	0.631	0	1	GNAI2
ABCA1	0	0.673365	0.516	0.124	0	1	ABCA1
CSF2RA	0	0.669532	0.477	0.055	0	1	CSF2RA
ATP1B1	0	0.66844	0.607	0.157	0	1	ATP1B1
CLTA	0	0.666667	0.888	0.524	0	1	CLTA
ETV5	0	0.663131	0.435	0.05	0	1	ETV5
CD81	0	0.660593	0.96	0.767	0	1	CD81
RHOQ	0	0.65804	0.65	0.224	0	1	RHOQ
TMEM70	0	0.657292	0.645	0.244	0	1	TMEM70
SH3BGRL	0	0.657262	0.922	0.587	0	1	SH3BGRL
DNASE2	0	0.656904	0.516	0.16	0	1	DNASE2
IL10	0	0.655164	0.253	0.038	0	1	IL10
CYFIP1	0	0.654934	0.567	0.148	0	1	CYFIP1
HIF1A	0	0.654483	0.77	0.354	0	1	HIF1A
ZEB2	0	0.652368	0.791	0.301	0	1	ZEB2
FYB11	0	0.649627	0.884	0.383	0	1	FYB1
ATP6AP1	0	0.649189	0.679	0.237	0	1	ATP6AP1
SLC31A2	0	0.648206	0.551	0.111	0	1	SLC31A2
HEXB	0	0.64796	0.687	0.25	0	1	HEXB
RHOG	0	0.647648	0.814	0.359	0	1	RHOG
EGR2	0	0.647411	0.365	0.064	0	1	EGR2
LGALS9	0	0.646352	0.616	0.161	0	1	LGALS9
GATM	0	0.646049	0.42	0.034	0	1	GATM
SLC16A10	0	0.645452	0.336	0.052	0	1	SLC16A10
MGAT1	0	0.644137	0.724	0.292	0	1	MGAT1
OAZ1	0	0.641419	0.985	0.857	0	1	OAZ1
RAB5C	0	0.641234	0.814	0.405	0	1	RAB5C
VEGFA	0	0.640871	0.426	0.109	0	1	VEGFA
RUNX1	0	0.64049	0.503	0.127	0	1	RUNX1
AP2S1	0	0.640477	0.836	0.424	0	1	AP2S1
ETS2	0	0.640245	0.748	0.321	0	1	ETS2
EPSTI1	0	0.638875	0.518	0.147	0	1	EPSTI1
ENPP2	0	0.63793	0.363	0.062	0	1	ENPP2
CX3CR1	0	0.635771	0.28	0.032	0	1	CX3CR1
CD300A	0	0.632624	0.543	0.107	0	1	CD300A
C1orf54	0	0.6322	0.541	0.166	0	1	C1orf54
HCLS11	0	0.631181	0.794	0.298	0	1	HCLS1
CDKN1A	0	0.630012	0.701	0.304	0	1	CDKN1A
GLA	0	0.629282	0.473	0.118	0	1	GLA
PEPD	0	0.628802	0.672	0.258	0	1	PEPD
RNF144B	0	0.627057	0.406	0.057	0	1	RNF144B
ADAM28	0	0.626283	0.435	0.046	0	1	ADAM28
2023-03-02	0	0.622439	0.686	0.26	0	1	2023-03-02
COMT	0	0.621201	0.779	0.352	0	1	COMT
LRRC25	0	0.620695	0.45	0.058	0	1	LRRC25
RNF149	0	0.620629	0.762	0.284	0	1	RNF149
NFE2L2	0	0.620265	0.855	0.511	0	1	NFE2L2
TSPAN33	0	0.61881	0.414	0.036	0	1	TSPAN33
RTN4	0	0.613369	0.895	0.504	0	1	RTN4
BLVRA	0	0.612208	0.598	0.202	0	1	BLVRA
JDP2	0	0.61094	0.516	0.145	0	1	JDP2
ATOX1	0	0.610429	0.726	0.361	0	1	ATOX1
HSPA6	0	0.609603	0.257	0.034	0	1	HSPA6
USF2	0	0.609401	0.74	0.31	0	1	USF2
ELL2	0	0.609215	0.498	0.141	0	1	ELL2
THEMIS2	0	0.608719	0.524	0.1	0	1	THEMIS2
PMP22	0	0.603465	0.606	0.252	0	1	PMP22
SKAP2	0	0.600593	0.627	0.182	0	1	SKAP2
CCDC88A	0	0.600123	0.652	0.219	0	1	CCDC88A
TFEC	0	0.597633	0.431	0.056	0	1	TFEC
CPEB4	0	0.597386	0.495	0.15	0	1	CPEB4
GPR137B	0	0.596105	0.474	0.087	0	1	GPR137B
SPINT2	0	0.594926	0.738	0.246	0	1	SPINT2
SDC3	0	0.594404	0.372	0.037	0	1	SDC3
TPP1	0	0.593804	0.574	0.166	0	1	TPP1
TKT	0	0.593387	0.796	0.399	0	1	TKT
B3GNT5	0	0.592684	0.37	0.05	0	1	B3GNT5
MGAT4A	0	0.591509	0.66	0.209	0	1	MGAT4A
FAM96A	0	0.591415	0.644	0.204	0	1	FAM96A
MCOLN1	0	0.591247	0.486	0.1	0	1	MCOLN1
TM6SF1	0	0.589831	0.428	0.056	0	1	TM6SF1
MPP1	0	0.589457	0.547	0.14	0	1	MPP1
NCF2	0	0.589406	0.52	0.104	0	1	NCF2
ALDH2	0	0.587036	0.673	0.278	0	1	ALDH2
LAT2	0	0.586467	0.496	0.087	0	1	LAT2
RAP2B	0	0.583103	0.65	0.223	0	1	RAP2B
PTAFR	0	0.581572	0.438	0.072	0	1	PTAFR
IL13RA1	0	0.57924	0.574	0.178	0	1	IL13RA1
GZF1	0	0.578025	0.38	0.081	0	1	GZF1
GLRX	0	0.574515	0.736	0.343	0	1	GLRX
CD93	0	0.567406	0.477	0.141	0	1	CD93
POU2F2	0	0.567132	0.476	0.109	0	1	POU2F2
NANS	0	0.565794	0.69	0.276	0	1	NANS
TLR1	0	0.564356	0.398	0.04	0	1	TLR1
CHCHD10	0	0.562524	0.823	0.416	0	1	CHCHD10
CNPY3	0	0.562325	0.716	0.273	0	1	CNPY3
MAP3K8	0	0.557642	0.688	0.297	0	1	MAP3K8
ITPR2	0	0.55704	0.569	0.18	0	1	ITPR2
CD33	0	0.55602	0.425	0.058	0	1	CD33
NABP1	0	0.553643	0.628	0.189	0	1	NABP1
NCF1	0	0.553528	0.577	0.171	0	1	NCF1
EBI3	0	0.552116	0.282	0.008	0	1	EBI3
H2AFY	0	0.549795	0.817	0.373	0	1	H2AFY
SMAP2	0	0.544572	0.833	0.373	0	1	SMAP2
AP1B1	0	0.542495	0.42	0.075	0	1	AP1B1
CLEC4A	0	0.542331	0.406	0.05	0	1	CLEC4A
SYK	0	0.541564	0.454	0.076	0	1	SYK
CYTH4	0	0.540164	0.464	0.092	0	1	CYTH4
FEZ2	0	0.540071	0.645	0.236	0	1	FEZ2
ACSL1	0	0.538463	0.42	0.081	0	1	ACSL1
PLXDC2	0	0.538147	0.618	0.211	0	1	PLXDC2
AXL	0	0.538094	0.442	0.11	0	1	AXL
ABHD12	0	0.537877	0.464	0.1	0	1	ABHD12
ALOX5	0	0.536164	0.455	0.081	0	1	ALOX5
CMTM6	0	0.533934	0.752	0.33	0	1	CMTM6
FILIP1L	0	0.533288	0.615	0.258	0	1	FILIP1L
SRGAP1	0	0.533198	0.374	0.061	0	1	SRGAP1
STX7	0	0.531202	0.602	0.208	0	1	STX7
HOMER3	0	0.53098	0.485	0.126	0	1	HOMER3
FMNL2	0	0.530338	0.395	0.063	0	1	FMNL2
ATP6V0A1	0	0.530151	0.434	0.091	0	1	ATP6V0A1
DPYSL2	0	0.52849	0.658	0.253	0	1	DPYSL2
BCL2A1	0	0.527381	0.589	0.193	0	1	BCL2A1
TNFSF12	0	0.526151	0.762	0.352	0	1	TNFSF12
LAMTOR2	0	0.524995	0.713	0.325	0	1	LAMTOR2
GLIPR1	0	0.524448	0.824	0.384	0	1	GLIPR1
SAMHD1	0	0.523795	0.754	0.321	0	1	SAMHD1
PABPC4	0	0.523342	0.603	0.239	0	1	PABPC4
CCR1	0	0.523168	0.371	0.056	0	1	CCR1
SMPDL3A	0	0.52067	0.326	0.048	0	1	SMPDL3A
MILR1	0	0.518051	0.396	0.048	0	1	MILR1
MEF2C	0	0.516778	0.755	0.34	0	1	MEF2C
STX11	0	0.51483	0.512	0.141	0	1	STX11
H3F3A	0	0.514692	0.991	0.899	0	1	H3F3A
TMSB4X1	0	0.514434	0.999	0.973	0	1	TMSB4X
AC020656.1	0	0.513699	0.44	0.09	0	1	AC020656.1
ME1	0	0.513606	0.331	0.029	0	1	ME1
NEAT1	0	0.512822	0.976	0.74	0	1	NEAT1
ITSN1	0	0.512382	0.358	0.079	0	1	ITSN1
RGL1	0	0.511098	0.323	0.051	0	1	RGL1
LILRB3	0	0.510669	0.416	0.07	0	1	LILRB3
MAT2A	0	0.510018	0.518	0.186	0	1	MAT2A
SLC15A3	0	0.509072	0.387	0.063	0	1	SLC15A3
MERTK	0	0.509061	0.348	0.039	0	1	MERTK
EFHD2	0	0.508971	0.809	0.343	0	1	EFHD2
ADAM9	0	0.507577	0.448	0.106	0	1	ADAM9
OTULINL	0	0.507528	0.48	0.107	0	1	OTULINL
CREBL2	0	0.505833	0.457	0.101	0	1	CREBL2
SNX29	0	0.503689	0.459	0.106	0	1	SNX29
ATG3	0	0.50351	0.699	0.307	0	1	ATG3
CAPZA2	0	0.501422	0.804	0.424	0	1	CAPZA2
FUCA2	0	0.498664	0.508	0.157	0	1	FUCA2
ATP6V0D1	0	0.498095	0.67	0.268	0	1	ATP6V0D1
ITGAX	0	0.497565	0.432	0.099	0	1	ITGAX
LILRB1	0	0.497527	0.376	0.054	0	1	LILRB1
BASP1	0	0.496335	0.574	0.202	0	1	BASP1
CLN8	0	0.495173	0.43	0.093	0	1	CLN8
GNPDA1	0	0.491151	0.493	0.144	0	1	GNPDA1
LTC4S	0	0.488481	0.599	0.189	0	1	LTC4S
OAS1	0	0.487094	0.463	0.13	0	1	OAS1
DRAM1	0	0.484916	0.404	0.093	0	1	DRAM1
GRINA	0	0.484754	0.522	0.168	0	1	GRINA
SMCO4	0	0.484324	0.501	0.138	0	1	SMCO4
CASP1	0	0.483334	0.613	0.216	0	1	CASP1
BST2	0	0.480084	0.888	0.504	0	1	BST2
PLA2G7	0	0.479026	0.268	0.052	0	1	PLA2G7
VSIR	0	0.478932	0.657	0.292	0	1	VSIR
FUOM	0	0.475164	0.51	0.151	0	1	FUOM
CLTC	0	0.474741	0.573	0.23	0	1	CLTC
PYGL	0	0.473967	0.385	0.076	0	1	PYGL
MAN1A1	0	0.473756	0.391	0.141	0	1	MAN1A1
IL1RN	0	0.472715	0.35	0.098	0	1	IL1RN
ADM	0	0.472436	0.31	0.096	0	1	ADM
MGST2	0	0.471986	0.642	0.239	0	1	MGST2
NFKBID	0	0.471277	0.559	0.175	0	1	NFKBID
PFKFB3	0	0.470082	0.423	0.125	0	1	PFKFB3
GNB4	0	0.469954	0.486	0.149	0	1	GNB4
PLEKHB2	0	0.468895	0.564	0.19	0	1	PLEKHB2
ADA2	0	0.467655	0.407	0.087	0	1	ADA2
AP2A2	0	0.463357	0.405	0.1	0	1	AP2A2
CEP170	0	0.463284	0.511	0.17	0	1	CEP170
PDXK	0	0.461937	0.596	0.201	0	1	PDXK
APLP2	0	0.459232	0.789	0.39	0	1	APLP2
FERMT3	0	0.459002	0.63	0.215	0	1	FERMT3
SNX5	0	0.458637	0.618	0.249	0	1	SNX5
SDSL	0	0.458445	0.36	0.05	0	1	SDSL
CRYL1	0	0.457815	0.525	0.167	0	1	CRYL1
MIR181A1HG	0	0.456723	0.328	0.053	0	1	MIR181A1HG
OLFML2B	0	0.456054	0.432	0.101	0	1	OLFML2B
DNPH1	0	0.455395	0.594	0.243	0	1	DNPH1
NAGA	0	0.455122	0.399	0.079	0	1	NAGA
LINC01678	0	0.453094	0.34	0.041	0	1	LINC01678
SLC16A3	0	0.453084	0.514	0.163	0	1	SLC16A3
NR4A1	0	0.451412	0.711	0.338	0	1	NR4A1
SERPINB6	0	0.449932	0.747	0.365	0	1	SERPINB6
C4orf48	0	0.447861	0.638	0.242	0	1	C4orf48
GOLIM4	0	0.445848	0.553	0.237	0	1	GOLIM4
CLEC2B1	0	0.444416	0.836	0.408	0	1	CLEC2B
MKNK1	0	0.441569	0.425	0.106	0	1	MKNK1
CARD16	0	0.440751	0.675	0.282	0	1	CARD16
M6PR	0	0.440557	0.72	0.323	0	1	M6PR
FGD2	0	0.44046	0.31	0.036	0	1	FGD2
MEF2A	0	0.440309	0.612	0.255	0	1	MEF2A
PEA15	0	0.43889	0.564	0.244	0	1	PEA15
LRMDA	0	0.436874	0.446	0.128	0	1	LRMDA
NCKAP1L	0	0.432927	0.493	0.128	0	1	NCKAP1L
OSTF1	0	0.432516	0.778	0.383	0	1	OSTF1
LCP2	0	0.431853	0.502	0.136	0	1	LCP2
TRIB1	0	0.431663	0.356	0.088	0	1	TRIB1
GAS2L3	0	0.42829	0.274	0.026	0	1	GAS2L3
TLR4	0	0.426771	0.35	0.082	0	1	TLR4
PAK1	0	0.426464	0.411	0.098	0	1	PAK1
CISD2	0	0.426119	0.572	0.216	0	1	CISD2
ADGRE2	0	0.425669	0.336	0.058	0	1	ADGRE2
B4GALT1	0	0.425498	0.595	0.261	0	1	B4GALT1
SLC4A7	0	0.423129	0.525	0.18	0	1	SLC4A7
SMS	0	0.421271	0.577	0.233	0	1	SMS
AP1S2	0	0.42059	0.661	0.285	0	1	AP1S2
REL	0	0.420556	0.85	0.443	0	1	REL
IDH1	0	0.420147	0.4	0.091	0	1	IDH1
SIRPA	0	0.419473	0.386	0.089	0	1	SIRPA
GAL3ST4	0	0.417094	0.262	0.016	0	1	GAL3ST4
VPS35	0	0.41651	0.716	0.336	0	1	VPS35
TWF2	0	0.414177	0.672	0.302	0	1	TWF2
COLGALT1	0	0.413978	0.394	0.101	0	1	COLGALT1
GNA13	0	0.411626	0.483	0.145	0	1	GNA13
TTYH3	0	0.410911	0.314	0.052	0	1	TTYH3
SCPEP1	0	0.410801	0.562	0.218	0	1	SCPEP1
PELI1	0	0.410651	0.371	0.118	0	1	PELI1
ATF6	0	0.409448	0.429	0.142	0	1	ATF6
SECTM1	0	0.409404	0.319	0.047	0	1	SECTM1
SNCA	0	0.40936	0.334	0.048	0	1	SNCA
EAF2	0	0.407648	0.365	0.079	0	1	EAF2
LACTB	0	0.403976	0.592	0.238	0	1	LACTB
MFSD12	0	0.403775	0.438	0.118	0	1	MFSD12
FAM49A	0	0.403726	0.372	0.083	0	1	FAM49A
CMTM3	0	0.402468	0.606	0.244	0	1	CMTM3
MIS18BP1	0	0.402022	0.56	0.238	0	1	MIS18BP1
BEX4	0	0.399887	0.583	0.243	0	1	BEX4
GNS	0	0.399316	0.43	0.135	0	1	GNS
OSM	0	0.399214	0.274	0.07	0	1	OSM
NEU1	0	0.398297	0.514	0.192	0	1	NEU1
MXD1	0	0.395541	0.396	0.118	0	1	MXD1
MYO5A	0	0.393683	0.361	0.078	0	1	MYO5A
HGF	0	0.390316	0.32	0.072	0	1	HGF
GM2A	0	0.388024	0.34	0.068	0	1	GM2A
PIK3AP1	0	0.387142	0.337	0.053	0	1	PIK3AP1
PTPN18	0	0.386055	0.454	0.139	0	1	PTPN18
UBE2D1	0	0.385863	0.575	0.234	0	1	UBE2D1
GUSB	0	0.385385	0.518	0.201	0	1	GUSB
STX12	0	0.381617	0.539	0.218	0	1	STX12
TNFAIP8L2	0	0.37967	0.323	0.045	0	1	TNFAIP8L2
NFIL3	0	0.379131	0.493	0.192	0	1	NFIL3
CREB5	0	0.3783	0.31	0.074	0	1	CREB5
CIITA	0	0.375963	0.287	0.042	0	1	CIITA
TNFRSF1B	0	0.374682	0.652	0.253	0	1	TNFRSF1B
DAPK1	0	0.374082	0.284	0.04	0	1	DAPK1
TM2D2	0	0.372449	0.445	0.155	0	1	TM2D2
GPR155	0	0.3714	0.336	0.064	0	1	GPR155
CD531	0	0.369657	0.856	0.401	0	1	CD53
FRMD4A	0	0.369092	0.305	0.054	0	1	FRMD4A
NUP214	0	0.368377	0.45	0.145	0	1	NUP214
CALHM6	0	0.366251	0.263	0.031	0	1	CALHM6
PLA2G15	0	0.366226	0.28	0.042	0	1	PLA2G15
SLC43A2	0	0.362936	0.363	0.084	0	1	SLC43A2
ZFHX3	0	0.362569	0.444	0.15	0	1	ZFHX3
GNA15	0	0.362509	0.343	0.066	0	1	GNA15
TRMT1	0	0.361412	0.352	0.093	0	1	TRMT1
SNX8	0	0.360685	0.336	0.071	0	1	SNX8
PAPSS2	0	0.360077	0.263	0.061	0	1	PAPSS2
CAT	0	0.359582	0.566	0.23	0	1	CAT
KIF1B	0	0.359144	0.349	0.103	0	1	KIF1B
BID	0	0.358101	0.512	0.183	0	1	BID
ADIPOR1	0	0.357368	0.508	0.188	0	1	ADIPOR1
RGS19	0	0.356785	0.604	0.241	0	1	RGS19
CACUL1	0	0.355753	0.437	0.135	0	1	CACUL1
SIGLEC10	0	0.355382	0.253	0.027	0	1	SIGLEC10
TLR5	0	0.354954	0.26	0.035	0	1	TLR5
CNDP2	0	0.354381	0.463	0.166	0	1	CNDP2
PDGFB	0	0.354045	0.253	0.038	0	1	PDGFB
RNF135	0	0.353561	0.349	0.089	0	1	RNF135
UBAC1	0	0.350469	0.492	0.185	0	1	UBAC1
LHFPL2	0	0.350395	0.307	0.069	0	1	LHFPL2
NECTIN2	0	0.349576	0.466	0.167	0	1	NECTIN2
BACH1	0	0.348933	0.499	0.189	0	1	BACH1
EIF4EBP1	0	0.347898	0.548	0.209	0	1	EIF4EBP1
NRIP1	0	0.347097	0.337	0.101	0	1	NRIP1
SDCCAG8	0	0.346453	0.472	0.183	0	1	SDCCAG8
KYNU	0	0.345801	0.317	0.068	0	1	KYNU
BCAT1	0	0.344163	0.312	0.078	0	1	BCAT1
VOPP1	0	0.342393	0.442	0.16	0	1	VOPP1
SLC9A9	0	0.34017	0.315	0.066	0	1	SLC9A9
KCNQ1	0	0.340143	0.271	0.036	0	1	KCNQ1
TMEM51	0	0.339595	0.264	0.036	0	1	TMEM51
CLEC4E	0	0.33911	0.252	0.047	0	1	CLEC4E
ZNF267	0	0.339097	0.524	0.197	0	1	ZNF267
PTGER41	0	0.33901	0.652	0.273	0	1	PTGER4
CCDC112	0	0.338592	0.373	0.119	0	1	CCDC112
OAZ2	0	0.336285	0.451	0.164	0	1	OAZ2
BLNK	0	0.335882	0.254	0.027	0	1	BLNK
SLC31A1	0	0.335345	0.315	0.07	0	1	SLC31A1
ACP2	0	0.33529	0.306	0.068	0	1	ACP2
RENBP	0	0.33449	0.292	0.04	0	1	RENBP
SH2B3	0	0.334374	0.293	0.071	0	1	SH2B3
KIAA0930	0	0.333139	0.364	0.103	0	1	KIAA0930
JAML	0	0.332094	0.395	0.105	0	1	JAML
NAAA	0	0.33072	0.454	0.155	0	1	NAAA
NUDT16	0	0.328891	0.43	0.156	0	1	NUDT16
MANBA	0	0.328429	0.317	0.073	0	1	MANBA
NIPSNAP2	0	0.328267	0.517	0.213	0	1	NIPSNAP2
DIRC2	0	0.327661	0.269	0.041	0	1	DIRC2
PTGS1	0	0.326038	0.262	0.04	0	1	PTGS1
SULT1A1	0	0.324332	0.277	0.062	0	1	SULT1A1
GLB1	0	0.322435	0.345	0.092	0	1	GLB1
TET2	0	0.320694	0.39	0.128	0	1	TET2
ST8SIA4	0	0.320156	0.466	0.148	0	1	ST8SIA4
HACD4	0	0.318705	0.395	0.104	0	1	HACD4
SNX10	0	0.318617	0.418	0.123	0	1	SNX10
WASHC4	0	0.318435	0.408	0.138	0	1	WASHC4
CHCHD7	0	0.315163	0.472	0.178	0	1	CHCHD7
PTPN6	0	0.315097	0.548	0.187	0	1	PTPN6
MIF4GD	0	0.315092	0.444	0.16	0	1	MIF4GD
ITGAM	0	0.314885	0.255	0.048	0	1	ITGAM
SNN	0	0.314319	0.33	0.09	0	1	SNN
RRAGD	0	0.313612	0.284	0.058	0	1	RRAGD
CFD	0	0.313605	0.905	0.163	0	1	CFD
ST3GAL6	0	0.312582	0.252	0.043	0	1	ST3GAL6
STAC3	0	0.309967	0.257	0.028	0	1	STAC3
GAS7	0	0.30933	0.29	0.061	0	1	GAS7
IRS2	0	0.30913	0.308	0.086	0	1	IRS2
DUSP3	0	0.308041	0.351	0.104	0	1	DUSP3
PLEKHO2	0	0.306803	0.275	0.064	0	1	PLEKHO2
SCIMP	0	0.304349	0.278	0.052	0	1	SCIMP
RIPK2	0	0.300888	0.397	0.136	0	1	RIPK2
BTK	0	0.296299	0.293	0.055	0	1	BTK
DMXL2	0	0.296112	0.293	0.067	0	1	DMXL2
LRP1	0	0.295921	0.53	0.192	0	1	LRP1
SRGAP2	0	0.294225	0.331	0.104	0	1	SRGAP2
SCN1B	0	0.291089	0.268	0.071	0	1	SCN1B
EVI2B1	0	0.290585	0.726	0.317	0	1	EVI2B
PARVG	0	0.290361	0.446	0.134	0	1	PARVG
TREM1	0	0.288611	0.307	0.086	0	1	TREM1
CSTA	0	0.288156	0.365	0.09	0	1	CSTA
ACER3	0	0.287052	0.29	0.069	0	1	ACER3
DOCK2	0	0.285988	0.419	0.129	0	1	DOCK2
UBE2F	0	0.28339	0.411	0.148	0	1	UBE2F
SLC11A2	0	0.282801	0.257	0.052	0	1	SLC11A2
HVCN1	0	0.282684	0.3	0.068	0	1	HVCN1
ITGA41	0	0.281065	0.569	0.21	0	1	ITGA4
ZFYVE16	0	0.279816	0.487	0.192	0	1	ZFYVE16
LYL1	0	0.278674	0.385	0.129	0	1	LYL1
SLC12A9	0	0.278515	0.307	0.074	0	1	SLC12A9
AC244090.1	0	0.273349	0.26	0.057	0	1	AC244090.1
FKBP15	0	0.271476	0.329	0.088	0	1	FKBP15
ARPIN	0	0.269302	0.264	0.066	0	1	ARPIN
NISCH	0	0.268025	0.264	0.065	0	1	NISCH
APH1B	0	0.263993	0.327	0.101	0	1	APH1B
TGFBR1	0	0.263152	0.311	0.089	0	1	TGFBR1
ATP6V1C1	0	0.263067	0.328	0.099	0	1	ATP6V1C1
HRH2	0	0.261759	0.294	0.081	0	1	HRH2
SGK3	0	0.26081	0.362	0.117	0	1	SGK3
PTPRJ	0	0.259733	0.309	0.081	0	1	PTPRJ
ME2	0	0.25935	0.411	0.146	0	1	ME2
PLXNC1	0	0.259153	0.258	0.049	0	1	PLXNC1
ARHGAP4	0	0.256143	0.364	0.1	0	1	ARHGAP4
MTMR14	0	0.255186	0.35	0.109	0	1	MTMR14
RHBDF2	0	0.254861	0.257	0.063	0	1	RHBDF2
RIN3	0	0.253683	0.28	0.076	0	1	RIN3
EVI2A	0	0.252945	0.52	0.192	0	1	EVI2A
ANKRD9	0	0.252847	0.267	0.072	0	1	ANKRD9
SAT2	9.7826e-308	0.368316	0.671	0.317	3.28089e-303	1	SAT2
GNPTG	1.33023e-307	0.343736	0.536	0.228	4.46133e-303	1	GNPTG
PGLS	3.25104e-307	0.485186	0.8	0.438	1.09033e-302	1	PGLS
RAP2A	7.72978e-307	0.273397	0.32	0.101	2.59241e-302	1	RAP2A
DDAH2	8.32346e-307	0.440074	0.76	0.382	2.79152e-302	1	DDAH2
SERPINB1	9.35469e-307	0.441118	0.82	0.453	3.13738e-302	1	SERPINB1
MSRB2	1.51457e-305	0.345854	0.543	0.232	5.07957e-301	1	MSRB2
HSD17B11	1.464e-304	0.392881	0.661	0.31	4.90996e-300	1	HSD17B11
ABL2	4.81545e-304	0.304068	0.289	0.087	1.615e-299	1	ABL2
TALDO1	3.1637e-301	0.507245	0.811	0.459	1.06104e-296	1	TALDO1
SFT2D1	4.32345e-301	0.304115	0.556	0.238	1.45e-296	1	SFT2D1
FGD4	4.9426e-300	0.288824	0.292	0.089	1.65765e-295	1	FGD4
C20orf27	5.1644e-300	0.269411	0.418	0.154	1.73204e-295	1	C20orf27
DERA	5.73625e-299	0.261156	0.379	0.134	1.92382e-294	1	DERA
PRDX3	9.30163e-299	0.403066	0.682	0.333	3.11958e-294	1	PRDX3
TIPARP	2.19379e-298	0.448823	0.632	0.295	7.35755e-294	1	TIPARP
RIN2	9.14507e-296	0.351002	0.358	0.126	3.06707e-291	1	RIN2
CBR1	4.6615e-295	0.32516	0.519	0.216	1.56338e-290	1	CBR1
DPP7	2.17216e-294	0.434374	0.785	0.427	7.28499e-290	1	DPP7
NRBF2	4.68412e-294	0.380502	0.59	0.268	1.57096e-289	1	NRBF2
SUSD6	7.36143e-294	0.260493	0.344	0.116	2.46888e-289	1	SUSD6
PQLC1	1.33784e-292	0.277778	0.443	0.171	4.48686e-288	1	PQLC1
SEC14L1	1.16399e-291	0.321047	0.533	0.228	3.90379e-287	1	SEC14L1
BLOC1S1	3.19368e-289	0.468895	0.823	0.469	1.0711e-284	1	BLOC1S1
ARRDC3	2.80406e-288	0.463829	0.471	0.193	9.40424e-284	1	ARRDC3
SRD5A3	3.12152e-285	0.263777	0.341	0.117	1.0469e-280	1	SRD5A3
NUBP1	6.09533e-284	0.254061	0.379	0.137	2.04425e-279	1	NUBP1
YBX3	1.59713e-283	0.460424	0.896	0.495	5.35647e-279	1	YBX3
LAMTOR1	3.56535e-281	0.454811	0.806	0.451	1.19575e-276	1	LAMTOR1
YBX1	5.88355e-280	0.490193	0.976	0.845	1.97322e-275	1	YBX1
AKIRIN2	5.86646e-279	0.303266	0.563	0.25	1.96749e-274	1	AKIRIN2
AHR	9.27144e-278	0.353348	0.387	0.144	3.10946e-273	1	AHR
ERP44	2.95507e-277	0.34787	0.643	0.311	9.9107e-273	1	ERP44
ARL8B	8.19601e-277	0.298702	0.517	0.22	2.74878e-272	1	ARL8B
SGMS1	1.67511e-276	0.264038	0.285	0.089	5.61798e-272	1	SGMS1
ATF5	2.15733e-276	0.296345	0.358	0.127	7.23525e-272	1	ATF5
CANX	6.05911e-274	0.433543	0.805	0.444	2.0321e-269	1	CANX
ETF1	2.91949e-271	0.301973	0.535	0.235	9.79139e-267	1	ETF1
RPN2	1.45058e-269	0.405246	0.73	0.386	4.86496e-265	1	RPN2
PARVB	2.00909e-267	0.273995	0.415	0.161	6.73809e-263	1	PARVB
ARPC1B	2.52728e-267	0.470845	0.887	0.551	8.476e-263	1	ARPC1B
SNX9	7.82602e-267	0.322701	0.514	0.223	2.62469e-262	1	SNX9
CTBS	1.29822e-266	0.283379	0.484	0.204	4.35399e-262	1	CTBS
CLEC11A	5.16307e-265	0.268192	0.28	0.089	1.73159e-260	1	CLEC11A
EPB41L2	2.55264e-264	0.271912	0.456	0.185	8.56103e-260	1	EPB41L2
TMEM14C	5.89069e-262	0.432268	0.815	0.452	1.97562e-257	1	TMEM14C
TMEM9B	6.40837e-262	0.272791	0.54	0.238	2.14924e-257	1	TMEM9B
TMBIM6	1.33029e-261	0.441383	0.96	0.739	4.46154e-257	1	TMBIM6
HSBP1	2.78847e-261	0.389319	0.755	0.396	9.35196e-257	1	HSBP1
OSBPL1A	2.16724e-259	0.274379	0.346	0.124	7.2685e-255	1	OSBPL1A
RTN3	1.59091e-258	0.326068	0.638	0.31	5.33559e-254	1	RTN3
PTPN2	1.54163e-257	0.294394	0.612	0.287	5.17032e-253	1	PTPN2
PICALM	1.99351e-251	0.269786	0.471	0.201	6.68584e-247	1	PICALM
VMA21	2.16255e-251	0.265484	0.466	0.198	7.25277e-247	1	VMA21
SSR3	4.91428e-250	0.397538	0.802	0.451	1.64815e-245	1	SSR3
CREM	1.17042e-249	0.363447	0.703	0.362	3.92537e-245	1	CREM
PRNP	6.56951e-249	0.401463	0.582	0.277	2.20328e-244	1	PRNP
LAMP1	7.1757e-246	0.407895	0.729	0.395	2.40659e-241	1	LAMP1
HSD17B4	4.24187e-245	0.261941	0.384	0.151	1.42264e-240	1	HSD17B4
POMP	4.48506e-245	0.445676	0.886	0.574	1.5042e-240	1	POMP
NTAN1	1.17935e-241	0.299213	0.507	0.227	3.95531e-237	1	NTAN1
TUBA1A	1.26957e-239	0.785902	0.877	0.624	4.25789e-235	1	TUBA1A
RNH1	5.57206e-239	0.461791	0.832	0.51	1.86876e-234	1	RNH1
ACTR2	1.62477e-238	0.370292	0.867	0.529	5.44916e-234	1	ACTR2
AUP1	2.21011e-238	0.289287	0.606	0.295	7.41228e-234	1	AUP1
LYPLA1	9.55263e-238	0.255985	0.482	0.211	3.20376e-233	1	LYPLA1
DUSP1	7.76736e-237	0.614326	0.972	0.777	2.60502e-232	1	DUSP1
DUSP6	4.92596e-234	0.554207	0.484	0.223	1.65207e-229	1	DUSP6
NAA20	5.61922e-234	0.315842	0.609	0.303	1.88457e-229	1	NAA20
LAMTOR4	2.4801e-233	0.397771	0.88	0.564	8.31776e-229	1	LAMTOR4
SUMO3	2.31084e-230	0.323268	0.645	0.327	7.7501e-226	1	SUMO3
CKS2	3.68676e-230	0.437117	0.431	0.184	1.23646e-225	1	CKS2
CTTNBP2NL	2.04411e-228	0.274375	0.341	0.132	6.85554e-224	1	CTTNBP2NL
RAB10	2.24479e-228	0.283341	0.6	0.295	7.52857e-224	1	RAB10
RANBP2	2.30396e-228	0.331223	0.432	0.186	7.72701e-224	1	RANBP2
TGOLN2	3.49569e-228	0.301822	0.772	0.422	1.17238e-223	1	TGOLN2
PTTG1IP	2.19015e-227	0.314286	0.737	0.39	7.34533e-223	1	PTTG1IP
TMEM147	6.19551e-226	0.3052	0.635	0.326	2.07785e-221	1	TMEM147
RCAN1	6.14612e-223	0.54645	0.269	0.094	2.06129e-218	1	RCAN1
CDV3	2.37846e-222	0.37404	0.831	0.502	7.97687e-218	1	CDV3
CCDC47	1.77387e-221	0.283797	0.655	0.336	5.94921e-217	1	CCDC47
MOB1A	2.42762e-221	0.289079	0.719	0.385	8.14176e-217	1	MOB1A
SLC39A1	3.43551e-221	0.281548	0.543	0.258	1.1522e-216	1	SLC39A1
SOCS3	1.87879e-220	0.364965	0.765	0.426	6.30108e-216	1	SOCS3
JPT11	4.76446e-219	0.300846	0.683	0.357	1.59791e-214	1	JPT1
OS9	8.52278e-219	0.303293	0.636	0.326	2.85837e-214	1	OS9
UQCR10	2.8431e-218	0.38468	0.846	0.531	9.5352e-214	1	UQCR10
CAPZB	7.68121e-214	0.398488	0.894	0.613	2.57612e-209	1	CAPZB
PLIN3	2.71103e-212	0.252262	0.495	0.228	9.09225e-208	1	PLIN3
STX4	1.72832e-210	0.262639	0.442	0.196	5.79645e-206	1	STX4
MCL1	1.87812e-210	0.392944	0.901	0.606	6.29885e-206	1	MCL1
TMEM219	1.9814e-210	0.346643	0.783	0.454	6.64521e-206	1	TMEM219
FLOT1	5.05749e-208	0.279444	0.628	0.322	1.69618e-203	1	FLOT1
PCBD1	3.62892e-207	0.261984	0.507	0.242	1.21707e-202	1	PCBD1
WLS	1.25164e-206	0.274462	0.276	0.099	4.19774e-202	1	WLS
GPX4	1.56459e-206	0.440838	0.936	0.706	5.24732e-202	1	GPX4
ATP5MF	1.6618e-204	0.342081	0.798	0.469	5.57336e-200	1	ATP5MF
TMBIM4	4.21905e-203	0.38385	0.866	0.562	1.41499e-198	1	TMBIM4
PTPN1	1.09993e-202	0.295772	0.571	0.288	3.68895e-198	1	PTPN1
SRA1	1.68835e-202	0.251587	0.541	0.265	5.66238e-198	1	SRA1
DNAJB6	1.46815e-201	0.357848	0.782	0.474	4.92387e-197	1	DNAJB6
CTSA	8.29791e-199	0.30504	0.598	0.312	2.78295e-194	1	CTSA
ATP6V0E1	1.7239e-198	0.387366	0.93	0.698	5.7816e-194	1	ATP6V0E1
SLC25A5	2.59197e-194	0.409678	0.885	0.624	8.69295e-190	1	SLC25A5
TSC22D2	5.10981e-191	0.267022	0.348	0.146	1.71373e-186	1	TSC22D2
PMAIP1	1.85495e-190	0.299759	0.38	0.161	6.22112e-186	1	PMAIP1
ARL4C1	9.28499e-189	0.412878	0.736	0.425	3.114e-184	1	ARL4C
SELENOT	2.14757e-188	0.251892	0.697	0.383	7.20252e-184	1	SELENOT
CAP1	4.39851e-187	0.354024	0.847	0.54	1.47517e-182	1	CAP1
GRASP	6.87666e-184	0.316621	0.425	0.196	2.30629e-179	1	GRASP
TPM3	4.62131e-183	0.382082	0.95	0.693	1.5499e-178	1	TPM3
SPATS2L	1.03663e-182	0.281095	0.49	0.24	3.47667e-178	1	SPATS2L
WWP1	3.54581e-182	0.276872	0.325	0.134	1.18919e-177	1	WWP1
DHRS7	3.63261e-180	0.325473	0.783	0.482	1.2183e-175	1	DHRS7
PRDX1	2.32824e-178	0.485067	0.911	0.66	7.80846e-174	1	PRDX1
ARPC21	8.91629e-177	0.335181	0.967	0.813	2.99034e-172	1	ARPC2
MAFF	1.40745e-176	0.308989	0.445	0.215	4.7203e-172	1	MAFF
LGALS3	1.42538e-173	0.610292	0.848	0.575	4.78043e-169	1	LGALS3
SLC3A2	2.11488e-173	0.328043	0.779	0.49	7.09289e-169	1	SLC3A2
RAB7A	1.67336e-169	0.270089	0.731	0.418	5.61213e-165	1	RAB7A
TSPO	1.43339e-166	0.359476	0.91	0.65	4.80729e-162	1	TSPO
TUBA1C	2.32449e-166	0.3194	0.661	0.373	7.79587e-162	1	TUBA1C
MYDGF	3.11113e-164	0.274485	0.736	0.424	1.04341e-159	1	MYDGF
AP2M1	3.40986e-164	0.271271	0.727	0.423	1.1436e-159	1	AP2M1
GSTO1	8.93594e-163	0.254615	0.786	0.476	2.99693e-158	1	GSTO1
KLF61	2.90359e-160	0.552866	0.946	0.778	9.73806e-156	1	KLF6
ELOC	8.24779e-157	0.35238	0.756	0.463	2.76615e-152	1	ELOC
HNRNPU	5.22892e-156	0.433318	0.898	0.648	1.75367e-151	1	HNRNPU
WASF2	1.53509e-155	0.301586	0.823	0.515	5.14839e-151	1	WASF2
CD40	1.71095e-154	0.259415	0.358	0.166	5.73818e-150	1	CD40
DNAJB11	5.05736e-154	0.499653	0.742	0.479	1.69614e-149	1	DNAJB1
JMJD1C	3.54568e-152	0.303501	0.716	0.429	1.18915e-147	1	JMJD1C
EIF4E	4.01575e-148	0.351867	0.447	0.23	1.3468e-143	1	EIF4E
NFKBIZ	6.6812e-145	0.256527	0.478	0.251	2.24074e-140	1	NFKBIZ
ATP5F1E	3.53405e-144	0.287066	0.982	0.897	1.18525e-139	1	ATP5F1E
CALR	8.60311e-144	0.428342	0.9	0.655	2.88531e-139	1	CALR
FOS	2.26437e-143	0.480417	0.979	0.777	7.59424e-139	1	FOS
COX5A	3.72877e-143	0.271471	0.801	0.517	1.25055e-138	1	COX5A
SNX3	3.12537e-139	0.282708	0.879	0.577	1.04819e-134	1	SNX3
SEC11A	4.67749e-137	0.287886	0.851	0.554	1.56874e-132	1	SEC11A
SERP1	2.98363e-133	0.282689	0.894	0.63	1.00065e-128	1	SERP1
SYAP1	1.78944e-131	0.30634	0.549	0.312	6.00141e-127	1	SYAP1
TMSB10	2.82349e-127	0.274361	0.997	0.948	9.46943e-123	1	TMSB10
ALOX5AP1	9.83625e-126	0.282704	0.561	0.321	3.29888e-121	1	ALOX5AP
MAP1LC3B	3.88658e-124	0.298755	0.835	0.569	1.30348e-119	1	MAP1LC3B
PDIA6	2.58979e-118	0.2742	0.774	0.498	8.68564e-114	1	PDIA6
NDUFB2	1.26958e-114	0.259145	0.867	0.608	4.25793e-110	1	NDUFB2
HSPD1	1.59374e-112	0.31537	0.806	0.549	5.34508e-108	1	HSPD1
CDKN1C	8.62665e-108	0.251175	0.392	0.209	2.89321e-103	1	CDKN1C
RHOA	1.09162e-105	0.270339	0.941	0.745	3.66109e-101	1	RHOA
SELENOK	7.45236e-88	0.458596	0.819	0.618	2.49937e-83	1	SELENOK
CYCS	7.21723e-77	0.319272	0.753	0.528	2.42052e-72	1	CYCS
TPT1	1.66534e-71	0.281635	0.999	0.974	5.58523e-67	1	TPT1
GYPC1	1.42695e-61	0.252874	0.654	0.472	4.7857e-57	1	GYPC
HSPA5	5.51756e-43	0.269131	0.802	0.617	1.85048e-38	1	HSPA5
IL7R1	0	2.1695	0.881	0.249	0	2	IL7R
ZFP36L21	0	1.57812	0.979	0.796	0	2	ZFP36L2
IL321	0	1.5695	0.975	0.445	0	2	IL32
CD21	0	1.55075	0.917	0.311	0	2	CD2
CD691	0	1.53831	0.941	0.421	0	2	CD69
KLRB1	0	1.53514	0.514	0.125	0	2	KLRB1
LTB	0	1.4895	0.752	0.271	0	2	LTB
TNFAIP31	0	1.46824	0.741	0.326	0	2	TNFAIP3
CXCR41	0	1.44046	0.952	0.542	0	2	CXCR4
TSC22D31	0	1.43448	0.957	0.732	0	2	TSC22D3
CD521	0	1.37175	0.935	0.455	0	2	CD52
RGCC1	0	1.34511	0.842	0.462	0	2	RGCC
DDIT41	0	1.29823	0.864	0.552	0	2	DDIT4
TRBC11	0	1.29177	0.553	0.196	0	2	TRBC1
TRAC1	0	1.28802	0.856	0.304	0	2	TRAC
TRBC21	0	1.20635	0.787	0.305	0	2	TRBC2
ANXA11	0	1.20421	0.944	0.824	0	2	ANXA1
GZMA1	0	1.17953	0.797	0.269	0	2	GZMA
SAMSN11	0	1.17777	0.702	0.321	0	2	SAMSN1
BTG11	0	1.1677	0.992	0.878	0	2	BTG1
EZR1	0	1.15974	0.8	0.468	0	2	EZR
CD3E1	0	1.14319	0.787	0.261	0	2	CD3E
CD3D1	0	1.13302	0.826	0.278	0	2	CD3D
CD3G1	0	1.13132	0.77	0.249	0	2	CD3G
CD40LG	0	1.12226	0.377	0.055	0	2	CD40LG
CYTIP1	0	1.10841	0.807	0.432	0	2	CYTIP
SOCS11	0	1.10029	0.608	0.258	0	2	SOCS1
SPOCK21	0	1.09273	0.573	0.168	0	2	SPOCK2
LEPROTL11	0	1.05084	0.745	0.428	0	2	LEPROTL1
RHOH1	0	1.04414	0.615	0.24	0	2	RHOH
PTGER42	0	1.02616	0.57	0.282	0	2	PTGER4
PRDM11	0	1.02058	0.568	0.252	0	2	PRDM1
TUBA4A1	0	1.01675	0.727	0.382	0	2	TUBA4A
TENT5C1	0	1.00758	0.486	0.159	0	2	TENT5C
DUSP21	0	1.00742	0.82	0.437	0	2	DUSP2
STK17B1	0	0.999376	0.807	0.487	0	2	STK17B
RORA1	0	0.990674	0.534	0.228	0	2	RORA
BATF	0	0.960618	0.388	0.142	0	2	BATF
LCK1	0	0.928955	0.591	0.196	0	2	LCK
IRF11	0	0.915768	0.831	0.582	0	2	IRF1
JUNB	0	0.912728	0.961	0.869	0	2	JUNB
STK17A1	0	0.887797	0.707	0.411	0	2	STK17A
EMB1	0	0.886279	0.527	0.236	0	2	EMB
PTPRC1	0	0.884578	0.962	0.597	0	2	PTPRC
ETS11	0	0.878163	0.663	0.337	0	2	ETS1
SARAF1	0	0.874767	0.898	0.751	0	2	SARAF
CD481	0	0.873267	0.8	0.432	0	2	CD48
TAGAP1	0	0.872115	0.63	0.324	0	2	TAGAP
CORO1A1	0	0.870736	0.842	0.486	0	2	CORO1A
RAC21	0	0.861396	0.789	0.433	0	2	RAC2
ARL4C2	0	0.849548	0.771	0.425	0	2	ARL4C
TRAT11	0	0.809166	0.394	0.112	0	2	TRAT1
ARHGDIB1	0	0.805506	0.916	0.73	0	2	ARHGDIB
ICOS	0	0.804361	0.322	0.078	0	2	ICOS
LAT1	0	0.800083	0.449	0.159	0	2	LAT
IL2RG1	0	0.797448	0.589	0.269	0	2	IL2RG
RPS191	0	0.792862	0.989	0.953	0	2	RPS19
SKAP11	0	0.790926	0.493	0.17	0	2	SKAP1
STK41	0	0.78778	0.751	0.484	0	2	STK4
SLAMF1	0	0.77851	0.285	0.059	0	2	SLAMF1
CXCR31	0	0.769944	0.35	0.094	0	2	CXCR3
RPS291	0	0.750833	0.974	0.924	0	2	RPS29
GATA3	0	0.734266	0.299	0.084	0	2	GATA3
RPL281	0	0.718703	0.99	0.968	0	2	RPL28
ACAP11	0	0.708934	0.546	0.234	0	2	ACAP1
CD6	0	0.707792	0.315	0.085	0	2	CD6
CD961	0	0.699542	0.394	0.128	0	2	CD96
RPSA1	0	0.697696	0.969	0.899	0	2	RPSA
RPS31	0	0.664283	0.986	0.949	0	2	RPS3
GZMK1	0	0.652131	0.564	0.222	0	2	GZMK
RPS271	0	0.63594	0.983	0.956	0	2	RPS27
CALM11	0	0.584277	0.977	0.923	0	2	CALM1
HLA-B1	0	0.54371	0.996	0.943	0	2	HLA-B
RPS15A1	0	0.5413	0.983	0.951	0	2	RPS15A
RPS261	0	0.533243	0.976	0.938	0	2	RPS26
B2M1	0	0.532964	0.999	0.992	0	2	B2M
RPS121	0	0.530236	0.989	0.967	0	2	RPS12
TPT11	0	0.513774	0.99	0.975	0	2	TPT1
RPS22	0	0.506608	0.993	0.958	0	2	RPS2
RPLP1	0	0.499792	0.995	0.979	0	2	RPLP1
RPL131	0	0.494717	0.994	0.975	0	2	RPL13
RPL411	0	0.485953	0.994	0.979	0	2	RPL41
RPS27A	0	0.484317	0.991	0.967	0	2	RPS27A
CCL51	0	0.483461	0.789	0.329	0	2	CCL5
RPS141	0	0.454068	0.984	0.961	0	2	RPS14
HSPA81	4.57394e-308	0.797478	0.925	0.831	1.53401e-303	2	HSPA8
AQP3	8.80997e-308	0.783446	0.318	0.103	2.95469e-303	2	AQP3
TXNIP1	5.89157e-307	0.994837	0.898	0.744	1.97592e-302	2	TXNIP
HLA-A1	1.43673e-306	0.515631	0.993	0.945	4.8185e-302	2	HLA-A
KLF62	1.4495e-302	0.9045	0.919	0.781	4.86133e-298	2	KLF6
ITK	2.54083e-299	0.592484	0.278	0.078	8.52143e-295	2	ITK
RPLP21	1.99718e-295	0.450303	0.984	0.955	6.69816e-291	2	RPLP2
HLA-C1	2.21342e-293	0.515625	0.987	0.93	7.42337e-289	2	HLA-C
RPL301	2.66e-293	0.430802	0.987	0.962	8.9211e-289	2	RPL30
CLEC2D1	3.01384e-293	0.694114	0.454	0.18	1.01078e-288	2	CLEC2D
OXNAD1	6.63503e-288	0.69179	0.347	0.119	2.22526e-283	2	OXNAD1
TMSB4X2	1.27967e-286	0.527047	0.995	0.973	4.29175e-282	2	TMSB4X
ISG201	2.13975e-281	0.73862	0.585	0.296	7.17631e-277	2	ISG20
RGS12	5.75625e-279	1.13818	0.582	0.3	1.93053e-274	2	RGS1
RPS251	9.76807e-275	0.436603	0.98	0.95	3.27601e-270	2	RPS25
RPS18	4.40671e-269	0.458784	0.988	0.958	1.47792e-264	2	RPS18
ALOX5AP2	4.03402e-268	0.727173	0.615	0.32	1.35293e-263	2	ALOX5AP
TNF1	1.44171e-264	0.85084	0.434	0.182	4.83519e-260	2	TNF
RPL141	2.04524e-264	0.445313	0.985	0.951	6.85933e-260	2	RPL14
SH3BGRL31	1.53119e-262	0.553149	0.965	0.875	5.1353e-258	2	SH3BGRL3
CD371	2.49038e-255	0.576123	0.779	0.484	8.35225e-251	2	CD37
SIT11	2.42055e-253	0.586667	0.295	0.096	8.11804e-249	2	SIT1
TBC1D10C1	4.30981e-253	0.647599	0.42	0.174	1.44542e-248	2	TBC1D10C
RPL18A	1.82181e-244	0.419361	0.982	0.95	6.10999e-240	2	RPL18A
HCST1	2.23795e-244	0.589421	0.808	0.498	7.50563e-240	2	HCST
RPL23A1	7.63485e-244	0.461914	0.972	0.933	2.56058e-239	2	RPL23A
RPL13A1	3.47717e-242	0.537395	0.977	0.941	1.16617e-237	2	RPL13A
EEF1A1	3.85559e-240	0.400999	0.997	0.984	1.29309e-235	2	EEF1A1
EIF11	4.30685e-239	0.426184	0.99	0.957	1.44443e-234	2	EIF1
RPL39	6.78761e-239	0.413414	0.982	0.947	2.27643e-234	2	RPL39
ICAM31	5.05157e-238	0.70134	0.521	0.274	1.69419e-233	2	ICAM3
FLT3LG	3.04378e-237	0.625387	0.289	0.102	1.02082e-232	2	FLT3LG
RUNX31	2.26474e-236	0.661959	0.421	0.182	7.59549e-232	2	RUNX3
ARHGAP15	9.86329e-236	0.658355	0.357	0.146	3.30795e-231	2	ARHGAP15
CD2471	8.1193e-232	0.487056	0.413	0.166	2.72305e-227	2	CD247
BIRC3	2.52569e-231	0.77788	0.545	0.299	8.47065e-227	2	BIRC3
TC2N	1.86966e-230	0.529558	0.292	0.1	6.27048e-226	2	TC2N
RPL10	4.20139e-230	0.3789	0.994	0.98	1.40906e-225	2	RPL10
CRYBG11	1.60157e-227	0.781628	0.439	0.21	5.37134e-223	2	CRYBG1
RPS71	2.99031e-227	0.392648	0.983	0.95	1.00289e-222	2	RPS7
MYL12A1	9.04899e-227	0.543613	0.945	0.875	3.03485e-222	2	MYL12A
EVL1	4.40166e-226	0.683178	0.588	0.345	1.47623e-221	2	EVL
DNAJA11	7.2913e-223	0.807881	0.824	0.705	2.44536e-218	2	DNAJA1
RPS16	3.12229e-218	0.457348	0.969	0.93	1.04715e-213	2	RPS16
RHOF1	7.07737e-218	0.627274	0.362	0.151	2.37361e-213	2	RHOF
RPL19	2.5163e-217	0.353091	0.986	0.965	8.43917e-213	2	RPL19
FYB12	1.52269e-213	0.598164	0.67	0.401	5.10681e-209	2	FYB1
FAM107B	9.53374e-212	0.784592	0.648	0.447	3.19743e-207	2	FAM107B
GIMAP71	1.93293e-210	0.728671	0.664	0.398	6.48265e-206	2	GIMAP7
SRSF71	2.93044e-207	0.69391	0.79	0.667	9.8281e-203	2	SRSF7
TOB11	1.24447e-206	0.990365	0.54	0.345	4.17371e-202	2	TOB1
FXYD5	1.30126e-206	0.617874	0.859	0.718	4.36417e-202	2	FXYD5
RPS211	2.37891e-205	0.444869	0.957	0.905	7.97838e-201	2	RPS21
SRGN1	6.51038e-205	0.464334	0.972	0.763	2.18345e-200	2	SRGN
RPS151	1.49983e-202	0.352556	0.985	0.958	5.03014e-198	2	RPS15
JUND1	4.99118e-202	0.522208	0.966	0.913	1.67394e-197	2	JUND
PNRC11	1.7458e-199	0.49104	0.95	0.894	5.85506e-195	2	PNRC1
UBE2S1	2.48635e-199	0.794314	0.597	0.406	8.33871e-195	2	UBE2S
PPP1R21	1.80274e-198	0.780122	0.64	0.477	6.04602e-194	2	PPP1R2
UBC	2.70586e-198	0.434787	0.982	0.936	9.07491e-194	2	UBC
RPL3	1.00011e-196	0.426345	0.98	0.939	3.35416e-192	2	RPL3
RPLP0	2.56881e-195	0.446418	0.974	0.918	8.61527e-191	2	RPLP0
UBALD21	5.45219e-195	0.748392	0.626	0.448	1.82855e-190	2	UBALD2
DNAJB12	2.7203e-194	0.790917	0.685	0.485	9.12336e-190	2	DNAJB1
PBXIP1	2.9699e-193	0.728812	0.426	0.222	9.96046e-189	2	PBXIP1
TNFAIP81	3.29006e-193	0.716756	0.522	0.31	1.10342e-188	2	TNFAIP8
RARRES31	2.15236e-192	0.620933	0.637	0.419	7.21859e-188	2	RARRES3
RNF19A1	2.77624e-191	0.778791	0.565	0.364	9.31094e-187	2	RNF19A
CREM1	7.75711e-191	0.847081	0.568	0.373	2.60158e-186	2	CREM
PDE4B1	1.94977e-189	0.697802	0.476	0.263	6.53914e-185	2	PDE4B
RPS4X	3.07353e-187	0.372583	0.982	0.946	1.0308e-182	2	RPS4X
DUSP5	4.05865e-187	0.783603	0.438	0.237	1.36119e-182	2	DUSP5
NFKBIA	7.83152e-187	0.78379	0.9	0.793	2.62653e-182	2	NFKBIA
RPL36AL1	1.0556e-186	0.435148	0.936	0.888	3.54027e-182	2	RPL36AL
GZMM1	6.79145e-184	0.435156	0.399	0.173	2.27772e-179	2	GZMM
AC058791.1	1.0133e-181	0.771187	0.419	0.226	3.39841e-177	2	AC058791.1
GPSM31	6.94635e-181	0.623811	0.618	0.413	2.32967e-176	2	GPSM3
ABRACL1	4.10707e-180	0.705384	0.588	0.403	1.37743e-175	2	ABRACL
S100A4	8.81124e-180	0.464965	0.97	0.794	2.95511e-175	2	S100A4
TTC39C	1.53416e-179	0.620792	0.33	0.147	5.14528e-175	2	TTC39C
H3F3B1	1.2715e-178	0.482325	0.989	0.961	4.26437e-174	2	H3F3B
INPP4B	3.9796e-178	0.502909	0.283	0.112	1.33468e-173	2	INPP4B
HOPX1	7.81094e-177	0.540773	0.314	0.128	2.61963e-172	2	HOPX
CITED21	6.19778e-176	0.910705	0.555	0.368	2.07861e-171	2	CITED2
RPL11	6.85355e-176	0.316072	0.992	0.969	2.29854e-171	2	RPL11
PARP81	1.88374e-175	0.567438	0.305	0.13	6.3177e-171	2	PARP8
LCP11	3.12764e-175	0.566042	0.711	0.462	1.04895e-170	2	LCP1
EML41	3.54398e-175	0.653522	0.568	0.376	1.18858e-170	2	EML4
PIM2	4.91124e-175	0.612283	0.313	0.136	1.64713e-170	2	PIM2
ITM2A1	9.46884e-174	0.721692	0.561	0.331	3.17566e-169	2	ITM2A
RPL18	9.49072e-173	0.339315	0.98	0.952	3.183e-168	2	RPL18
OCIAD21	2.37856e-170	0.631278	0.467	0.262	7.97722e-166	2	OCIAD2
SEPT11	3.7472e-170	0.587936	0.414	0.212	1.25674e-165	2	SEPT1
GBP51	3.34184e-168	0.599013	0.329	0.147	1.12079e-163	2	GBP5
SLF1	2.45095e-166	0.603183	0.278	0.116	8.21999e-162	2	SLF1
RPS28	4.35995e-165	0.336563	0.984	0.953	1.46224e-160	2	RPS28
CDC42SE21	2.16139e-163	0.605932	0.498	0.302	7.24887e-159	2	CDC42SE2
RCAN3	1.33496e-162	0.530098	0.282	0.119	4.47717e-158	2	RCAN3
LDHB	4.7994e-162	0.615286	0.715	0.595	1.60962e-157	2	LDHB
PTGER2	2.37194e-161	0.654054	0.278	0.12	7.95502e-157	2	PTGER2
CD71	2.13025e-159	0.429078	0.375	0.172	7.14444e-155	2	CD7
RPL6	2.87411e-158	0.321147	0.98	0.956	9.63918e-154	2	RPL6
RPS20	3.24405e-158	0.463707	0.922	0.882	1.08799e-153	2	RPS20
RBM381	1.2994e-157	0.568442	0.388	0.197	4.35791e-153	2	RBM38
TERF2IP1	1.693e-156	0.592765	0.703	0.599	5.678e-152	2	TERF2IP
SLA1	4.56426e-156	0.610446	0.491	0.288	1.53076e-151	2	SLA
AES1	8.12527e-156	0.582236	0.698	0.57	2.72505e-151	2	AES
GMFG1	1.06422e-155	0.581542	0.714	0.529	3.56919e-151	2	GMFG
FAU	5.32656e-155	0.296251	0.985	0.955	1.78642e-150	2	FAU
CNOT6L1	1.76111e-154	0.674958	0.461	0.276	5.90642e-150	2	CNOT6L
APOBEC3G1	2.90873e-154	0.533341	0.453	0.25	9.75529e-150	2	APOBEC3G
EEF1D1	1.14964e-153	0.411517	0.935	0.88	3.85567e-149	2	EEF1D
IKZF11	1.92837e-153	0.553517	0.405	0.211	6.46737e-149	2	IKZF1
ELF11	3.99343e-153	0.628154	0.688	0.547	1.33932e-148	2	ELF1
CD441	1.78498e-151	0.52166	0.703	0.522	5.98648e-147	2	CD44
CCR7	8.56976e-151	0.606178	0.31	0.134	2.87413e-146	2	CCR7
RSBN11	1.6134e-147	0.665767	0.418	0.243	5.41104e-143	2	RSBN1
RPL38	3.14905e-147	0.418113	0.918	0.877	1.05613e-142	2	RPL38
CDKN2D1	8.2923e-147	0.604584	0.481	0.297	2.78107e-142	2	CDKN2D
ANP32E	4.56932e-145	0.684431	0.51	0.353	1.53246e-140	2	ANP32E
DDX51	1.87739e-144	0.437418	0.911	0.866	6.2964e-140	2	DDX5
GPR1831	2.09196e-143	0.480064	0.6	0.371	7.01601e-139	2	GPR183
RPL10A	4.27659e-142	0.358429	0.964	0.922	1.43428e-137	2	RPL10A
KIAA15511	4.2085e-141	0.589263	0.549	0.372	1.41145e-136	2	KIAA1551
RNF125	8.21885e-141	0.534413	0.307	0.146	2.75644e-136	2	RNF125
DUSP41	1.2138e-140	0.644134	0.266	0.116	4.07085e-136	2	DUSP4
CD532	2.51692e-138	0.526402	0.616	0.42	8.44124e-134	2	CD53
SMAP21	8.44812e-138	0.593201	0.578	0.394	2.83333e-133	2	SMAP2
CKLF1	3.08094e-137	0.663734	0.583	0.43	1.03329e-132	2	CKLF
MCL11	4.76377e-135	0.586495	0.732	0.619	1.59767e-130	2	MCL1
RPL35	8.51411e-134	0.35213	0.949	0.919	2.85546e-129	2	RPL35
TUBB4B	3.01763e-133	0.641887	0.641	0.521	1.01205e-128	2	TUBB4B
RASAL3	5.56879e-132	0.458841	0.255	0.111	1.86766e-127	2	RASAL3
IKZF31	8.86895e-132	0.431024	0.256	0.107	2.97447e-127	2	IKZF3
TMEM238	4.025e-131	0.552637	0.28	0.132	1.3499e-126	2	TMEM238
SLC2A3	7.05225e-131	0.581681	0.621	0.457	2.36518e-126	2	SLC2A3
C16orf54	5.05961e-129	0.480962	0.265	0.119	1.69689e-124	2	C16orf54
CIB11	5.17485e-129	0.571461	0.668	0.566	1.73554e-124	2	CIB1
PTPN71	6.73652e-128	0.454182	0.328	0.161	2.2593e-123	2	PTPN7
YWHAZ1	8.70606e-128	0.481569	0.789	0.716	2.91984e-123	2	YWHAZ
CASP81	4.39498e-127	0.553267	0.337	0.177	1.47399e-122	2	CASP8
H2AFZ1	7.82933e-127	0.604423	0.797	0.728	2.6258e-122	2	H2AFZ
LIMD21	6.90312e-126	0.498221	0.537	0.351	2.31517e-121	2	LIMD2
RPS5	4.18248e-125	0.312079	0.961	0.916	1.40272e-120	2	RPS5
RPL7A	1.69974e-124	0.281417	0.987	0.955	5.70057e-120	2	RPL7A
GTF2B1	3.50084e-124	0.666363	0.53	0.387	1.17411e-119	2	GTF2B
PFN11	1.00613e-123	0.370474	0.946	0.891	3.37436e-119	2	PFN1
APBB1IP1	7.14202e-123	0.525327	0.522	0.347	2.39529e-118	2	APBB1IP
RPL21	4.18248e-121	0.295755	0.972	0.941	1.40272e-116	2	RPL21
PDCD41	6.69568e-121	0.567915	0.534	0.389	2.2456e-116	2	PDCD4
LAPTM51	5.90526e-120	0.389773	0.742	0.5	1.98051e-115	2	LAPTM5
GSTK11	2.21533e-119	0.555714	0.662	0.572	7.42979e-115	2	GSTK1
RPL34	3.88518e-119	0.25855	0.983	0.962	1.30301e-114	2	RPL34
PTPN22	1.01125e-118	0.452049	0.25	0.113	3.39152e-114	2	PTPN22
ANKRD121	7.39431e-118	0.528224	0.7	0.616	2.4799e-113	2	ANKRD12
HLA-E1	9.78287e-118	0.302805	0.966	0.888	3.28098e-113	2	HLA-E
NCL1	7.67576e-114	0.47869	0.839	0.793	2.5743e-109	2	NCL
ZC3HAV11	2.90904e-112	0.586148	0.418	0.267	9.75633e-108	2	ZC3HAV1
SYNE21	1.49525e-111	0.454352	0.492	0.317	5.01478e-107	2	SYNE2
BCL2	3.71597e-110	0.520992	0.326	0.179	1.24626e-105	2	BCL2
CCND31	6.14395e-110	0.531696	0.454	0.302	2.06056e-105	2	CCND3
HMGB2	2.6674e-109	0.554589	0.521	0.388	8.94593e-105	2	HMGB2
OASL1	4.79152e-109	0.497043	0.253	0.12	1.60698e-104	2	OASL
RPL27A1	1.79619e-108	0.384785	0.911	0.87	6.02406e-104	2	RPL27A
HINT11	8.46239e-108	0.411252	0.856	0.799	2.83812e-103	2	HINT1
NPM1	8.32799e-107	0.380963	0.89	0.833	2.79304e-102	2	NPM1
GNG21	1.66872e-106	0.474502	0.294	0.151	5.59654e-102	2	GNG2
SUB11	2.18862e-106	0.437144	0.773	0.725	7.34019e-102	2	SUB1
DEF6	2.95671e-106	0.468126	0.282	0.145	9.91621e-102	2	DEF6
RPS6	1.79695e-105	0.278412	0.973	0.94	6.02662e-101	2	RPS6
ID21	5.98457e-105	0.737391	0.556	0.421	2.0071e-100	2	ID2
DDX241	2.71297e-104	0.442426	0.766	0.711	9.09877e-100	2	DDX24
CDKN1B1	5.82519e-104	0.599106	0.477	0.346	1.95365e-99	2	CDKN1B
CFL11	6.55755e-104	0.340742	0.935	0.879	2.19927e-99	2	CFL1
RPL9	1.10234e-103	0.266504	0.972	0.933	3.69704e-99	2	RPL9
COTL11	2.46096e-103	0.335528	0.692	0.495	8.25357e-99	2	COTL1
ARAP21	2.0603e-102	0.396479	0.274	0.137	6.90982e-98	2	ARAP2
G3BP21	7.77041e-102	0.628536	0.528	0.42	2.60604e-97	2	G3BP2
EEF1B2	3.22984e-101	0.31132	0.934	0.875	1.08322e-96	2	EEF1B2
IL10RA1	1.16322e-100	0.511512	0.384	0.238	3.90119e-96	2	IL10RA
RIPOR2	2.90885e-100	0.349704	0.283	0.141	9.75568e-96	2	RIPOR2
PTMA	4.14439e-100	0.273754	0.996	0.975	1.38995e-95	2	PTMA
DOK21	1.46246e-99	0.481672	0.423	0.269	4.9048e-95	2	DOK2
RACK1	2.07685e-99	0.273757	0.974	0.933	6.96532e-95	2	RACK1
GIMAP41	1.32708e-98	0.577864	0.521	0.367	4.45075e-94	2	GIMAP4
RPL26	9.24526e-98	0.252947	0.969	0.939	3.10068e-93	2	RPL26
LDHA	1.15856e-97	0.400704	0.837	0.755	3.88558e-93	2	LDHA
RPS10	2.48851e-96	0.396463	0.819	0.776	8.34596e-92	2	RPS10
IER21	2.86745e-96	0.46584	0.828	0.744	9.61685e-92	2	IER2
BBC3	4.62335e-96	0.526895	0.256	0.133	1.55058e-91	2	BBC3
IQGAP22	9.66363e-96	0.478367	0.41	0.26	3.24099e-91	2	IQGAP2
RPS4Y11	2.9346e-95	0.378357	0.832	0.727	9.84206e-91	2	RPS4Y1
ITGA42	5.52981e-95	0.485896	0.37	0.226	1.85459e-90	2	ITGA4
FYN1	9.74814e-95	0.42107	0.383	0.233	3.26933e-90	2	FYN
BIN21	2.96139e-94	0.456579	0.362	0.217	9.93189e-90	2	BIN2
PIK3IP11	1.9157e-93	0.515068	0.359	0.218	6.42487e-89	2	PIK3IP1
JPT12	1.03448e-91	0.542985	0.494	0.372	3.46945e-87	2	JPT1
ARF61	3.27107e-91	0.512252	0.508	0.394	1.09705e-86	2	ARF6
PPP2R5C1	3.36226e-91	0.441847	0.495	0.362	1.12763e-86	2	PPP2R5C
TRAF3IP31	5.06984e-91	0.44097	0.328	0.185	1.70032e-86	2	TRAF3IP3
MAF1	2.65605e-90	0.602576	0.321	0.193	8.90787e-86	2	MAF
RPL36	5.30001e-90	0.28725	0.951	0.916	1.77752e-85	2	RPL36
TGFB11	1.39717e-88	0.502002	0.565	0.461	4.68584e-84	2	TGFB1
PABPC1	8.0892e-88	0.371499	0.819	0.76	2.71295e-83	2	PABPC1
PIM1	9.85422e-88	0.507979	0.32	0.192	3.30491e-83	2	PIM1
NCK2	1.03616e-87	0.474697	0.296	0.171	3.47508e-83	2	NCK2
TANK	6.75835e-86	0.583516	0.402	0.288	2.26662e-81	2	TANK
SSR21	1.46807e-85	0.400145	0.731	0.685	4.92363e-81	2	SSR2
GPRIN3	1.68178e-85	0.465144	0.279	0.157	5.64035e-81	2	GPRIN3
ARPC5L1	2.06475e-85	0.486595	0.526	0.41	6.92476e-81	2	ARPC5L
RPL27	4.80399e-85	0.319941	0.907	0.874	1.61116e-80	2	RPL27
SLC38A1	5.77009e-85	0.38328	0.267	0.141	1.93517e-80	2	SLC38A1
MDFIC	3.24687e-83	0.537512	0.357	0.24	1.08894e-78	2	MDFIC
ADGRE51	4.85841e-83	0.481183	0.388	0.258	1.62941e-78	2	ADGRE5
CYLD	7.8538e-82	0.47021	0.363	0.237	2.63401e-77	2	CYLD
EVI2B2	4.3317e-79	0.470033	0.474	0.337	1.45277e-74	2	EVI2B
SNHG12	4.47126e-79	0.478786	0.287	0.169	1.49957e-74	2	SNHG12
HERPUD11	4.77705e-79	0.35726	0.726	0.634	1.60213e-74	2	HERPUD1
BTG2	2.64498e-77	0.386907	0.733	0.63	8.87072e-73	2	BTG2
EMP31	1.89232e-76	0.338896	0.785	0.682	6.34645e-72	2	EMP3
YPEL51	1.31637e-75	0.475695	0.57	0.485	4.41484e-71	2	YPEL5
JAK11	4.10221e-75	0.420876	0.653	0.6	1.3758e-70	2	JAK1
MBP1	1.2738e-74	0.412861	0.446	0.32	4.27206e-70	2	MBP
C9orf781	1.82665e-74	0.514989	0.533	0.456	6.12622e-70	2	C9orf78
LINC00623	1.95973e-74	0.422433	0.264	0.15	6.57256e-70	2	LINC00623
GTF3A1	1.74322e-73	0.498076	0.554	0.486	5.8464e-69	2	GTF3A
RPL4	7.8825e-73	0.33203	0.829	0.795	2.64363e-68	2	RPL4
GPR651	1.33856e-72	0.446442	0.344	0.221	4.48925e-68	2	GPR65
BRD21	4.1768e-71	0.55782	0.499	0.41	1.40081e-66	2	BRD2
CCND21	2.17781e-70	0.465407	0.397	0.281	7.30395e-66	2	CCND2
FKBP11	5.18314e-70	0.41721	0.299	0.183	1.73832e-65	2	FKBP11
ARHGEF11	7.69249e-70	0.425021	0.337	0.222	2.57991e-65	2	ARHGEF1
CKS21	1.00442e-69	0.506747	0.306	0.194	3.36863e-65	2	CKS2
KPNA2	1.05224e-69	0.528698	0.319	0.211	3.52899e-65	2	KPNA2
ORAI11	4.01716e-69	0.463327	0.354	0.242	1.34728e-64	2	ORAI1
SMCHD11	1.6338e-67	0.404062	0.49	0.388	5.47944e-63	2	SMCHD1
HMOX2	4.05636e-67	0.488692	0.329	0.224	1.36042e-62	2	HMOX2
TSTD11	6.17766e-67	0.423405	0.379	0.261	2.07186e-62	2	TSTD1
PSME11	1.11119e-66	0.364375	0.771	0.746	3.72672e-62	2	PSME1
SEPT61	4.41013e-65	0.448619	0.402	0.291	1.47907e-60	2	SEPT6
PIK3R11	1.39165e-64	0.511777	0.501	0.404	4.66733e-60	2	PIK3R1
SH3KBP11	1.40305e-63	0.441017	0.42	0.315	4.70554e-59	2	SH3KBP1
EIF51	3.09038e-63	0.432938	0.65	0.607	1.03645e-58	2	EIF5
DOCK81	4.12572e-63	0.408621	0.355	0.244	1.38369e-58	2	DOCK8
ANKRD28	4.17857e-63	0.586757	0.349	0.249	1.40141e-58	2	ANKRD28
RBM8A1	5.12053e-63	0.399598	0.665	0.626	1.71732e-58	2	RBM8A
BTG31	4.27159e-62	0.538285	0.418	0.329	1.4326e-57	2	BTG3
KMT2E1	1.03649e-61	0.424481	0.608	0.566	3.47619e-57	2	KMT2E
TGIF1	3.51357e-61	0.527795	0.375	0.28	1.17838e-56	2	TGIF1
LBH1	3.84877e-61	0.396736	0.413	0.289	1.2908e-56	2	LBH
TAF1D1	4.30899e-61	0.459099	0.564	0.508	1.44515e-56	2	TAF1D
APRT1	6.40729e-60	0.387533	0.653	0.618	2.14888e-55	2	APRT
HIGD2A1	2.05632e-59	0.41082	0.632	0.584	6.89647e-55	2	HIGD2A
CLPP	2.84793e-59	0.530363	0.377	0.294	9.5514e-55	2	CLPP
RGS101	3.50198e-59	0.31719	0.533	0.407	1.17449e-54	2	RGS10
RPL31	5.1737e-59	0.266542	0.873	0.845	1.73515e-54	2	RPL31
KLF2	1.6521e-58	0.591037	0.703	0.662	5.54082e-54	2	KLF2
HLA-F1	5.71156e-57	0.380684	0.566	0.492	1.91554e-52	2	HLA-F
TRADD	6.50332e-57	0.52588	0.305	0.218	2.18108e-52	2	TRADD
AKIRIN1	1.08179e-56	0.463645	0.373	0.285	3.62812e-52	2	AKIRIN1
RSRP11	2.11195e-56	0.351554	0.623	0.566	7.08306e-52	2	RSRP1
TSPYL21	5.93578e-56	0.440103	0.331	0.228	1.99074e-51	2	TSPYL2
PIP4K2A1	1.329e-55	0.427541	0.398	0.302	4.45719e-51	2	PIP4K2A
ARID4B	1.20948e-54	0.440575	0.519	0.457	4.05635e-50	2	ARID4B
RNF2131	1.53175e-54	0.33273	0.507	0.423	5.13717e-50	2	RNF213
HNRNPF1	3.31834e-54	0.405527	0.582	0.54	1.11291e-49	2	HNRNPF
SLBP	3.68245e-54	0.473103	0.366	0.28	1.23502e-49	2	SLBP
CRIP11	1.22407e-53	0.361551	0.474	0.371	4.10528e-49	2	CRIP1
NSD3	2.18148e-53	0.397064	0.52	0.458	7.31626e-49	2	NSD3
LSP11	2.24188e-53	0.269034	0.532	0.397	7.5188e-49	2	LSP1
HNRNPDL1	8.86894e-53	0.287033	0.782	0.771	2.97447e-48	2	HNRNPDL
NOP53	9.66804e-53	0.333524	0.681	0.649	3.24247e-48	2	NOP53
FOXO1	1.62903e-52	0.41015	0.251	0.16	5.46344e-48	2	FOXO1
CYCS1	5.10012e-52	0.34227	0.594	0.541	1.71048e-47	2	CYCS
TRAPPC6A	9.054e-52	0.447995	0.295	0.207	3.03653e-47	2	TRAPPC6A
MZT2A1	1.03429e-51	0.459374	0.453	0.385	3.46881e-47	2	MZT2A
TPM31	5.04131e-51	0.275389	0.791	0.706	1.69075e-46	2	TPM3
HSPE1	8.61632e-50	0.399099	0.632	0.602	2.88974e-45	2	HSPE1
HSPA51	8.94515e-49	0.32823	0.675	0.627	3.00003e-44	2	HSPA5
SYNRG1	9.90852e-49	0.359388	0.311	0.217	3.32312e-44	2	SYNRG
HNRNPA1	1.73969e-48	0.279195	0.785	0.76	5.83457e-44	2	HNRNPA1
KIF2A1	3.47773e-48	0.414022	0.38	0.295	1.16636e-43	2	KIF2A
ARID5A	4.35622e-48	0.455852	0.39	0.31	1.46099e-43	2	ARID5A
FAM89B	7.48548e-48	0.459866	0.475	0.424	2.51048e-43	2	FAM89B
TMA71	2.84839e-47	0.257148	0.809	0.807	9.55294e-43	2	TMA7
CYTOR1	4.71646e-47	0.432652	0.385	0.3	1.58181e-42	2	CYTOR
SS18L2	1.29417e-46	0.44095	0.344	0.265	4.34039e-42	2	SS18L2
RAN	1.31661e-46	0.319408	0.703	0.687	4.41566e-42	2	RAN
PMAIP11	1.5135e-46	0.389871	0.261	0.17	5.07599e-42	2	PMAIP1
PSMB91	1.537e-46	0.305575	0.602	0.537	5.15478e-42	2	PSMB9
HSP90AA11	1.21039e-45	0.257025	0.914	0.882	4.05942e-41	2	HSP90AA1
SIAH2	1.40549e-45	0.395149	0.289	0.204	4.71373e-41	2	SIAH2
TBCC	3.54051e-45	0.383125	0.26	0.175	1.18742e-40	2	TBCC
ASF1A	1.54026e-44	0.428775	0.259	0.178	5.16571e-40	2	ASF1A
CORO1B	3.12533e-44	0.600762	0.386	0.331	1.04817e-39	2	CORO1B
EVI2A1	3.77037e-44	0.374799	0.298	0.21	1.26451e-39	2	EVI2A
AMD11	5.0569e-44	0.451758	0.483	0.432	1.69598e-39	2	AMD1
GPBP11	1.00897e-43	0.379221	0.528	0.485	3.38388e-39	2	GPBP1
YWHAB	1.27678e-43	0.293412	0.811	0.789	4.28205e-39	2	YWHAB
RCSD1	1.62009e-43	0.311505	0.272	0.184	5.43346e-39	2	RCSD1
PIM3	1.6328e-43	0.399543	0.498	0.429	5.47607e-39	2	PIM3
FKBP5	1.98651e-43	0.465654	0.371	0.295	6.66236e-39	2	FKBP5
CNN21	3.83972e-43	0.38327	0.358	0.276	1.28776e-38	2	CNN2
FNBP11	4.23568e-43	0.367944	0.384	0.306	1.42056e-38	2	FNBP1
SLFN51	4.38787e-43	0.317554	0.325	0.233	1.4716e-38	2	SLFN5
DNAJB9	1.16888e-42	0.430152	0.332	0.258	3.92019e-38	2	DNAJB9
ATP5MG1	1.66583e-42	0.257817	0.805	0.792	5.58685e-38	2	ATP5MG
SNRPD21	2.39208e-41	0.307306	0.686	0.683	8.02255e-37	2	SNRPD2
PPP1R15A	3.70879e-41	0.387988	0.68	0.648	1.24386e-36	2	PPP1R15A
BUB31	4.39553e-41	0.419169	0.399	0.335	1.47417e-36	2	BUB3
NASP	8.81948e-41	0.417364	0.437	0.376	2.95788e-36	2	NASP
SNHG15	8.0401e-40	0.442691	0.34	0.268	2.69649e-35	2	SNHG15
DDX21	2.93881e-39	0.332165	0.612	0.577	9.85617e-35	2	DDX21
SRSF21	4.17137e-39	0.35784	0.553	0.526	1.39899e-34	2	SRSF2
RSRC21	2.44558e-38	0.397425	0.555	0.535	8.20198e-34	2	RSRC2
MIER1	1.45998e-37	0.434347	0.461	0.418	4.89648e-33	2	MIER1
FGFR1OP21	1.8519e-37	0.426537	0.436	0.393	6.21092e-33	2	FGFR1OP2
SEPT9	2.45307e-37	0.352526	0.303	0.227	8.2271e-33	2	SEPT9
TMEM173	1.29974e-36	0.407572	0.365	0.302	4.35908e-32	2	TMEM173
SET1	1.81475e-36	0.273545	0.719	0.713	6.08632e-32	2	SET
OPTN1	2.79e-36	0.348584	0.378	0.304	9.35711e-32	2	OPTN
REL1	3.8675e-36	0.253126	0.548	0.466	1.29708e-31	2	REL
EPC11	5.88664e-36	0.389193	0.411	0.353	1.97426e-31	2	EPC1
FUS1	1.52106e-35	0.28614	0.669	0.665	5.10132e-31	2	FUS
IDS	1.65525e-35	0.371189	0.44	0.388	5.55138e-31	2	IDS
BHLHE40	1.81608e-35	0.42569	0.342	0.274	6.09078e-31	2	BHLHE40
FAM177A1	5.43561e-35	0.436158	0.464	0.429	1.82299e-30	2	FAM177A1
SFPQ	2.60445e-34	0.307326	0.626	0.61	8.73481e-30	2	SFPQ
DDIT3	5.07596e-34	0.435558	0.318	0.251	1.70238e-29	2	DDIT3
GSPT1	9.29547e-34	0.456893	0.414	0.374	3.11751e-29	2	GSPT1
SIGIRR1	1.64198e-33	0.368445	0.408	0.356	5.50686e-29	2	SIGIRR
IVNS1ABP	1.81119e-33	0.345867	0.29	0.218	6.07437e-29	2	IVNS1ABP
PLP21	2.48124e-33	0.369766	0.518	0.474	8.32158e-29	2	PLP2
PAXX1	7.11819e-33	0.378265	0.371	0.314	2.3873e-28	2	PAXX
YY11	1.67306e-32	0.327594	0.56	0.549	5.61111e-28	2	YY1
TSC22D4	2.01082e-32	0.343573	0.27	0.203	6.74388e-28	2	TSC22D4
CLEC2B2	2.04186e-32	0.42779	0.496	0.434	6.84799e-28	2	CLEC2B
RBM251	2.74137e-32	0.297604	0.594	0.581	9.19399e-28	2	RBM25
CCSER21	4.64331e-32	0.337419	0.372	0.308	1.55727e-27	2	CCSER2
MCUB	6.27906e-32	0.377387	0.349	0.287	2.10587e-27	2	MCUB
MYADM	1.96899e-31	0.371086	0.511	0.473	6.60358e-27	2	MYADM
VAMP21	3.68745e-31	0.310163	0.552	0.528	1.2367e-26	2	VAMP2
SF1	4.76487e-31	0.267634	0.558	0.543	1.59804e-26	2	SF1
PRPF38B1	1.1473e-30	0.352968	0.459	0.419	3.8478e-26	2	PRPF38B
NOP58	1.62713e-30	0.41096	0.345	0.289	5.45708e-26	2	NOP58
PSME21	3.92087e-29	0.269138	0.605	0.58	1.31498e-24	2	PSME2
PRDX2	7.04552e-29	0.321911	0.513	0.472	2.36293e-24	2	PRDX2
CCDC107	7.22761e-29	0.35636	0.447	0.411	2.424e-24	2	CCDC107
CMC21	1.22401e-28	0.366546	0.32	0.265	4.10507e-24	2	CMC2
IDI1	2.30423e-28	0.359823	0.336	0.277	7.72792e-24	2	IDI1
UBE2D21	3.64121e-28	0.292271	0.583	0.591	1.22119e-23	2	UBE2D2
RAP1B1	6.69706e-28	0.265329	0.598	0.6	2.24606e-23	2	RAP1B
BAZ1A	1.38461e-27	0.360282	0.365	0.311	4.64369e-23	2	BAZ1A
SNRPB1	6.47198e-27	0.282361	0.547	0.544	2.17057e-22	2	SNRPB
YWHAQ	8.73748e-27	0.377785	0.491	0.481	2.93038e-22	2	YWHAQ
H2AFV	2.23886e-26	0.306074	0.505	0.486	7.5087e-22	2	H2AFV
HCLS12	4.41959e-26	0.255792	0.399	0.328	1.48224e-21	2	HCLS1
PHLDA1	4.48934e-26	0.358274	0.294	0.225	1.50564e-21	2	PHLDA1
COQ10B	1.08547e-25	0.360976	0.318	0.27	3.64044e-21	2	COQ10B
LYAR1	1.8218e-25	0.369931	0.297	0.241	6.10994e-21	2	LYAR
ANP32B	3.22144e-25	0.267255	0.6	0.598	1.08041e-20	2	ANP32B
CSK1	5.39235e-25	0.298354	0.293	0.235	1.80849e-20	2	CSK
RAB11FIP1	6.86751e-25	0.341184	0.357	0.3	2.30322e-20	2	RAB11FIP1
MAP1LC3B1	1.38944e-24	0.274373	0.593	0.587	4.65991e-20	2	MAP1LC3B
SLC3A21	1.45752e-24	0.300292	0.527	0.509	4.88824e-20	2	SLC3A2
TLK1	4.07349e-24	0.342063	0.327	0.279	1.36617e-19	2	TLK1
KLF131	1.64862e-23	0.323653	0.405	0.373	5.52914e-19	2	KLF13
SRSF31	1.73371e-23	0.302549	0.606	0.624	5.81453e-19	2	SRSF3
AAK1	1.98744e-23	0.273847	0.362	0.315	6.66548e-19	2	AAK1
TMF1	3.86142e-23	0.390058	0.36	0.326	1.29504e-18	2	TMF1
CDC42EP3	9.92793e-23	0.333395	0.353	0.303	3.32963e-18	2	CDC42EP3
NXT1	1.00101e-22	0.343352	0.384	0.352	3.3572e-18	2	NXT1
RPL22L1	1.83595e-22	0.322108	0.461	0.441	6.15742e-18	2	RPL22L1
ABHD17A1	1.48032e-21	0.283654	0.428	0.401	4.96471e-17	2	ABHD17A
XBP1	6.57621e-21	0.323027	0.44	0.415	2.20553e-16	2	XBP1
UBE2D3	1.20135e-20	0.252149	0.62	0.635	4.02908e-16	2	UBE2D3
PDCL3	1.30572e-20	0.427276	0.29	0.252	4.37911e-16	2	PDCL3
CSRNP1	6.23226e-20	0.358868	0.322	0.283	2.09017e-15	2	CSRNP1
ACTR3	7.95854e-20	0.262193	0.539	0.534	2.66913e-15	2	ACTR3
FRMD4B1	1.88755e-19	0.505695	0.306	0.272	6.33046e-15	2	FRMD4B
UCP22	3.12969e-19	0.256906	0.358	0.301	1.04964e-14	2	UCP2
NR3C1	3.87084e-19	0.394989	0.41	0.399	1.2982e-14	2	NR3C1
RSL1D1	1.29928e-18	0.28571	0.525	0.535	4.35752e-14	2	RSL1D1
RGS191	2.66644e-18	0.277578	0.307	0.264	8.94271e-14	2	RGS19
APOBEC3C1	2.96633e-18	0.289424	0.258	0.209	9.94846e-14	2	APOBEC3C
SNHG8	4.38138e-18	0.27648	0.515	0.511	1.46943e-13	2	SNHG8
CCNH	4.67597e-18	0.327957	0.369	0.341	1.56823e-13	2	CCNH
REST1	1.20144e-17	0.336232	0.345	0.316	4.02938e-13	2	REST
CDC42SE11	2.34898e-17	0.266895	0.371	0.341	7.87802e-13	2	CDC42SE1
TIPARP1	7.82505e-17	0.291078	0.352	0.316	2.62437e-12	2	TIPARP
PPP1R181	8.39228e-17	0.292887	0.352	0.322	2.8146e-12	2	PPP1R18
EIF4A2	1.36354e-16	0.254002	0.551	0.554	4.57303e-12	2	EIF4A2
PNP	1.98471e-16	0.326642	0.276	0.238	6.65632e-12	2	PNP
ODF2L	2.14163e-16	0.250792	0.279	0.236	7.18261e-12	2	ODF2L
CDK2AP21	2.34139e-16	0.351597	0.364	0.342	7.85255e-12	2	CDK2AP2
TMEM123	1.12323e-15	0.299376	0.425	0.419	3.7671e-11	2	TMEM123
HNRNPA0	1.76803e-15	0.284211	0.489	0.504	5.92963e-11	2	HNRNPA0
HBP1	2.44864e-15	0.305467	0.294	0.263	8.21225e-11	2	HBP1
SP110	2.73213e-15	0.278382	0.389	0.365	9.16303e-11	2	SP110
TAP1	3.03765e-15	0.275637	0.26	0.221	1.01877e-10	2	TAP1
PPP1R10	3.16955e-15	0.312321	0.46	0.461	1.063e-10	2	PPP1R10
GCC21	3.66885e-15	0.295836	0.441	0.428	1.23046e-10	2	GCC2
USP3	5.46406e-15	0.294722	0.262	0.225	1.83254e-10	2	USP3
TMPO	1.02537e-14	0.261336	0.276	0.24	3.43888e-10	2	TMPO
UPP1	1.44848e-14	0.29324	0.32	0.287	4.85791e-10	2	UPP1
ZNF2671	1.58669e-14	0.311753	0.254	0.218	5.32143e-10	2	ZNF267
ZNRD1	5.0391e-14	0.272017	0.275	0.242	1.69001e-09	2	ZNRD1
STOM	1.29455e-13	0.2616	0.392	0.372	4.34167e-09	2	STOM
LBR	1.09643e-12	0.276934	0.255	0.225	3.67721e-08	2	LBR
GGNBP2	1.69134e-12	0.29847	0.386	0.381	5.67241e-08	2	GGNBP2
TNFRSF14	2.87238e-12	0.258336	0.293	0.266	9.63339e-08	2	TNFRSF14
SSBP4	4.73951e-12	0.287392	0.33	0.316	1.58954e-07	2	SSBP4
BAX	5.26831e-12	0.412863	0.418	0.433	1.76689e-07	2	BAX
AC020916.1	5.3639e-12	0.280365	0.255	0.22	1.79895e-07	2	AC020916.1
ANXA61	1.96696e-11	0.250074	0.283	0.254	6.59679e-07	2	ANXA6
DDX3X	2.92214e-11	0.264816	0.529	0.557	9.80029e-07	2	DDX3X
PAIP21	3.24957e-11	0.275134	0.472	0.502	1.08984e-06	2	PAIP2
HNRNPAB	7.18126e-11	0.265751	0.47	0.486	2.40845e-06	2	HNRNPAB
PPP1CA1	8.59372e-11	0.259886	0.418	0.423	2.88216e-06	2	PPP1CA
RAB8B1	8.74313e-11	0.253072	0.331	0.314	2.93227e-06	2	RAB8B
MTHFD2	1.21418e-10	0.304287	0.266	0.243	4.07212e-06	2	MTHFD2
BCAS2	1.61269e-10	0.286556	0.338	0.331	5.40863e-06	2	BCAS2
UGP2	3.92557e-10	0.275613	0.382	0.384	1.31656e-05	2	UGP2
URI1	9.25309e-10	0.254336	0.298	0.281	3.1033e-05	2	URI1
CLK1	1.87241e-09	0.257388	0.334	0.324	6.27969e-05	2	CLK1
SLC2A4RG	4.85135e-09	0.254385	0.28	0.262	0.000162704	2	SLC2A4RG
RNMT	1.0184e-08	0.265209	0.377	0.381	0.00034155	2	RNMT
NCOR11	1.5399e-08	0.259708	0.436	0.456	0.000516453	2	NCOR1
NOSIP	8.58021e-08	0.30284	0.309	0.308	0.00287763	2	NOSIP
SMAP1	2.92199e-07	0.28365	0.299	0.298	0.00979977	2	SMAP1
CACYBP	2.93875e-07	0.280639	0.382	0.401	0.00985598	2	CACYBP
GRPEL1	9.48281e-05	0.251527	0.266	0.269	1	2	GRPEL1
LUZP1	0.000749426	0.264419	0.259	0.263	1	2	LUZP1
AKIRIN21	0.00851841	0.250562	0.259	0.273	1	2	AKIRIN2
CCR71	0	2.06438	0.737	0.11	0	3	CCR7
IL7R2	0	1.86265	0.945	0.248	0	3	IL7R
LTB1	0	1.64085	0.862	0.267	0	3	LTB
SARAF2	0	1.41706	0.95	0.748	0	3	SARAF
RPS292	0	1.32361	0.985	0.924	0	3	RPS29
LDHB1	0	1.30719	0.854	0.587	0	3	LDHB
SELL	0	1.29883	0.498	0.112	0	3	SELL
TRBC12	0	1.27278	0.562	0.197	0	3	TRBC1
RPS272	0	1.23194	0.99	0.956	0	3	RPS27
RPS122	0	1.22421	0.994	0.967	0	3	RPS12
BTG12	0	1.18411	0.991	0.879	0	3	BTG1
MAL	0	1.16696	0.392	0.031	0	3	MAL
RPL211	0	1.16612	0.98	0.94	0	3	RPL21
RPS201	0	1.16484	0.961	0.88	0	3	RPS20
CRYBG12	0	1.16228	0.547	0.205	0	3	CRYBG1
TCF7	0	1.15987	0.448	0.075	0	3	TCF7
RPS3A	0	1.14903	0.987	0.949	0	3	RPS3A
LEPROTL12	0	1.14422	0.784	0.427	0	3	LEPROTL1
CD482	0	1.14197	0.853	0.43	0	3	CD48
GIMAP72	0	1.13918	0.795	0.391	0	3	GIMAP7
RPS61	0	1.12704	0.985	0.94	0	3	RPS6
RPSA2	0	1.11993	0.975	0.899	0	3	RPSA
RPL391	0	1.11656	0.987	0.946	0	3	RPL39
PIK3IP12	0	1.11403	0.564	0.206	0	3	PIK3IP1
CYTIP2	0	1.10575	0.84	0.432	0	3	CYTIP
TRBC22	0	1.09958	0.764	0.309	0	3	TRBC2
EEF1B21	0	1.09446	0.961	0.873	0	3	EEF1B2
RPL302	0	1.08378	0.993	0.962	0	3	RPL30
LEF1	0	1.07046	0.382	0.046	0	3	LEF1
RPL91	0	1.06076	0.98	0.933	0	3	RPL9
RPL32	0	1.05271	0.989	0.962	0	3	RPL32
IRF12	0	1.04507	0.825	0.584	0	3	IRF1
RPS32	0	1.04395	0.989	0.949	0	3	RPS3
RPLP22	0	1.03343	0.989	0.955	0	3	RPLP2
RPL132	0	1.02805	0.994	0.975	0	3	RPL13
RPL341	0	1.02655	0.988	0.961	0	3	RPL34
RPS15A2	0	1.02487	0.989	0.951	0	3	RPS15A
RPS181	0	1.02427	0.99	0.958	0	3	RPS18
CD3D2	0	1.01742	0.815	0.281	0	3	CD3D
RPL33	0	1.01182	0.985	0.939	0	3	RPL3
RPL13A2	0	1.0075	0.982	0.941	0	3	RPL13A
CD3E2	0	1.00232	0.774	0.264	0	3	CD3E
RPS27A1	0	0.999997	0.993	0.967	0	3	RPS27A
PASK	0	0.981258	0.269	0.024	0	3	PASK
TRAC2	0	0.966784	0.808	0.31	0	3	TRAC
RPL37	0	0.966342	0.985	0.946	0	3	RPL37
RPS142	0	0.964555	0.99	0.961	0	3	RPS14
TXNIP2	0	0.963596	0.925	0.743	0	3	TXNIP
FYB13	0	0.961652	0.757	0.397	0	3	FYB1
RPS212	0	0.960001	0.971	0.904	0	3	RPS21
RPS281	0	0.955915	0.989	0.953	0	3	RPS28
RPL27A2	0	0.954774	0.942	0.868	0	3	RPL27A
RHOH2	0	0.95278	0.615	0.242	0	3	RHOH
PABPC11	0	0.952285	0.909	0.755	0	3	PABPC1
RPL381	0	0.949556	0.948	0.876	0	3	RPL38
BIRC31	0	0.949262	0.614	0.297	0	3	BIRC3
RPL111	0	0.948105	0.993	0.969	0	3	RPL11
RPS161	0	0.946431	0.977	0.93	0	3	RPS16
RPS252	0	0.945688	0.985	0.95	0	3	RPS25
RPS13	0	0.944162	0.988	0.947	0	3	RPS13
NOP531	0	0.92022	0.835	0.64	0	3	NOP53
RPS24	0	0.915369	0.993	0.958	0	3	RPS2
RPS51	0	0.913244	0.979	0.915	0	3	RPS5
RPL191	0	0.910948	0.993	0.965	0	3	RPL19
TRAT12	0	0.909582	0.428	0.112	0	3	TRAT1
CMTM8	0	0.905353	0.278	0.072	0	3	CMTM8
TSC22D32	0	0.904586	0.94	0.735	0	3	TSC22D3
RPL361	0	0.893926	0.977	0.915	0	3	RPL36
CLEC2D2	0	0.89123	0.495	0.179	0	3	CLEC2D
RPS8	0	0.889747	0.991	0.965	0	3	RPS8
RPL23	0	0.888837	0.942	0.855	0	3	RPL23
EEF1A11	0	0.879876	0.995	0.984	0	3	EEF1A1
CD73	0	0.869039	0.534	0.163	0	3	CD7
RPL42	0	0.866981	0.893	0.791	0	3	RPL4
RPL282	0	0.865888	0.993	0.968	0	3	RPL28
RPL7	0	0.865835	0.956	0.888	0	3	RPL7
RPL22	0	0.838107	0.973	0.914	0	3	RPL22
RPS4X1	0	0.836337	0.986	0.946	0	3	RPS4X
ICOS1	0	0.835162	0.342	0.078	0	3	ICOS
RPL35A	0	0.831912	0.983	0.947	0	3	RPL35A
RPL18A1	0	0.831248	0.985	0.95	0	3	RPL18A
STK42	0	0.828997	0.79	0.483	0	3	STK4
RPS262	0	0.82666	0.986	0.937	0	3	RPS26
RPL10A1	0	0.822892	0.975	0.922	0	3	RPL10A
STK17B2	0	0.821493	0.795	0.489	0	3	STK17B
RPL311	0	0.818412	0.927	0.842	0	3	RPL31
CXCR42	0	0.81627	0.933	0.545	0	3	CXCR4
CD22	0	0.814265	0.782	0.322	0	3	CD2
TPT12	0	0.812407	0.992	0.975	0	3	TPT1
RPS101	0	0.81232	0.887	0.773	0	3	RPS10
RPL181	0	0.811813	0.987	0.952	0	3	RPL18
ETS12	0	0.811352	0.672	0.338	0	3	ETS1
CD3G2	0	0.805143	0.702	0.256	0	3	CD3G
SPOCK22	0	0.789614	0.521	0.173	0	3	SPOCK2
RPL5	0	0.788423	0.982	0.942	0	3	RPL5
RPL142	0	0.786562	0.986	0.951	0	3	RPL14
IPCEF1	0	0.784753	0.298	0.059	0	3	IPCEF1
RPS23	0	0.783927	0.988	0.961	0	3	RPS23
IKZF12	0	0.783437	0.512	0.206	0	3	IKZF1
PIM21	0	0.780566	0.38	0.133	0	3	PIM2
RPL29	0	0.771582	0.985	0.945	0	3	RPL29
RPS11	0	0.759479	0.956	0.892	0	3	RPS11
CD692	0	0.751245	0.881	0.427	0	3	CD69
RPS152	0	0.74772	0.989	0.958	0	3	RPS15
ITK1	0	0.747166	0.331	0.076	0	3	ITK
RPL412	0	0.74067	0.995	0.979	0	3	RPL41
RPL23A2	0	0.735422	0.977	0.933	0	3	RPL23A
RPL101	0	0.730303	0.995	0.98	0	3	RPL10
TRABD2A	0	0.73024	0.25	0.029	0	3	TRABD2A
RPL271	0	0.729804	0.938	0.873	0	3	RPL27
RCAN31	0	0.716141	0.353	0.115	0	3	RCAN3
NPM11	0	0.695816	0.93	0.831	0	3	NPM1
RPLP11	0	0.687981	0.997	0.979	0	3	RPLP1
UBA52	0	0.687657	0.969	0.921	0	3	UBA52
RPS9	0	0.686247	0.979	0.93	0	3	RPS9
EEF1D2	0	0.683865	0.956	0.879	0	3	EEF1D
PTPRC2	0	0.683856	0.964	0.598	0	3	PTPRC
RPS192	0	0.676689	0.989	0.954	0	3	RPS19
FCMR	0	0.670651	0.286	0.066	0	3	FCMR
RPL24	0	0.670416	0.981	0.937	0	3	RPL24
RPL261	0	0.660568	0.981	0.938	0	3	RPL26
RPL61	0	0.659879	0.987	0.955	0	3	RPL6
RPS72	0	0.657931	0.989	0.95	0	3	RPS7
RPL37A	0	0.656519	0.961	0.915	0	3	RPL37A
PLAC8	0	0.650642	0.308	0.088	0	3	PLAC8
CAMK4	0	0.641993	0.259	0.051	0	3	CAMK4
RPL12	0	0.637375	0.985	0.953	0	3	RPL12
RACK11	0	0.616354	0.977	0.933	0	3	RACK1
IL322	0	0.606992	0.887	0.453	0	3	IL32
NACA	0	0.550745	0.975	0.932	0	3	NACA
RPL7A1	0	0.51796	0.988	0.955	0	3	RPL7A
FAU1	0	0.516643	0.988	0.955	0	3	FAU
RPL8	0	0.502618	0.986	0.951	0	3	RPL8
CD28	1.99388e-307	0.626011	0.272	0.072	6.68707e-303	3	CD28
SFXN1	3.3672e-305	0.808933	0.375	0.134	1.12929e-300	3	SFXN1
RPS4Y12	1.1247e-302	0.769616	0.882	0.725	3.77202e-298	3	RPS4Y1
CD2472	5.41347e-301	0.598894	0.455	0.165	1.81557e-296	3	CD247
ISG202	4.44132e-298	0.75784	0.611	0.296	1.48953e-293	3	ISG20
RPL351	5.84016e-295	0.546949	0.968	0.918	1.95867e-290	3	RPL35
BATF1	1.56896e-293	0.903939	0.39	0.143	5.26199e-289	3	BATF
OXNAD11	2.11533e-288	0.684462	0.357	0.12	7.0944e-284	3	OXNAD1
TOMM7	1.14238e-279	0.692245	0.904	0.82	3.83132e-275	3	TOMM7
CNOT6L2	3.33539e-275	0.860774	0.537	0.273	1.11862e-270	3	CNOT6L
ARHGDIB2	1.46602e-269	0.653529	0.916	0.731	4.91674e-265	3	ARHGDIB
RPLP01	5.53999e-269	0.536445	0.978	0.918	1.858e-264	3	RPLP0
LCK2	1.81393e-267	0.617806	0.503	0.203	6.08355e-263	3	LCK
CD372	4.93088e-266	0.611263	0.798	0.484	1.65372e-261	3	CD37
SOCS12	9.37494e-244	0.80231	0.537	0.264	3.14417e-239	3	SOCS1
PPP1R22	1.65937e-242	0.829862	0.678	0.476	5.5652e-238	3	PPP1R2
RIPOR21	3.32899e-241	0.697311	0.361	0.137	1.11648e-236	3	RIPOR2
ACAP12	3.1558e-238	0.565213	0.518	0.237	1.05839e-233	3	ACAP1
LIMD22	3.37671e-236	0.702817	0.616	0.347	1.13248e-231	3	LIMD2
SMAP22	1.49933e-232	0.711301	0.659	0.39	5.02846e-228	3	SMAP2
SH3YL1	1.94754e-232	0.681109	0.293	0.105	6.53165e-228	3	SH3YL1
ARL4C3	1.16421e-231	0.630962	0.732	0.429	3.90454e-227	3	ARL4C
ELF12	6.40645e-229	0.802528	0.733	0.545	2.14859e-224	3	ELF1
AP3M2	2.20396e-224	0.623213	0.278	0.095	7.39165e-220	3	AP3M2
SNHG81	3.1937e-220	0.788964	0.684	0.501	1.0711e-215	3	SNHG8
FXYD51	2.90674e-218	0.663427	0.875	0.717	9.74863e-214	3	FXYD5
TRAF3IP32	8.76302e-218	0.646891	0.413	0.181	2.93894e-213	3	TRAF3IP3
RPL15	1.18865e-217	0.46916	0.978	0.933	3.98651e-213	3	RPL15
CD522	3.46613e-216	0.421865	0.843	0.463	1.16247e-211	3	CD52
CD271	1.58966e-215	0.526545	0.309	0.108	5.33139e-211	3	CD27
DDIT42	2.12328e-213	0.72505	0.78	0.559	7.12106e-209	3	DDIT4
TNFAIP82	1.41449e-209	0.685285	0.548	0.309	4.74392e-205	3	TNFAIP8
MALAT11	2.02524e-209	0.270314	1	0.997	6.79224e-205	3	MALAT1
LAT3	1.56964e-207	0.580312	0.393	0.163	5.26427e-203	3	LAT
PNRC12	3.63709e-201	0.514812	0.952	0.894	1.21981e-196	3	PNRC1
CD61	8.39111e-201	0.47824	0.268	0.089	2.81421e-196	3	CD6
INPP4B1	1.37519e-199	0.571046	0.3	0.112	4.61212e-195	3	INPP4B
GPR1832	6.03159e-194	0.545268	0.662	0.368	2.02287e-189	3	GPR183
GIMAP42	1.67332e-193	0.780625	0.595	0.363	5.61199e-189	3	GIMAP4
HINT12	2.3621e-188	0.558328	0.884	0.798	7.92199e-184	3	HINT1
SKAP12	1.56563e-187	0.521565	0.41	0.177	5.25079e-183	3	SKAP1
RPL36AL2	2.20954e-183	0.436623	0.947	0.888	7.41037e-179	3	RPL36AL
HNRNPA11	6.92862e-180	0.581235	0.844	0.757	2.32372e-175	3	HNRNPA1
SLA2	1.901e-177	0.685213	0.516	0.287	6.37557e-173	3	SLA
EIF12	5.99767e-171	0.375149	0.986	0.957	2.0115e-166	3	EIF1
EIF3E	4.11203e-169	0.633489	0.765	0.645	1.37909e-164	3	EIF3E
TSHZ2	7.24098e-167	0.541049	0.253	0.094	2.42848e-162	3	TSHZ2
FAM107B1	8.9023e-165	0.66294	0.647	0.448	2.98565e-160	3	FAM107B
SMCHD12	1.04197e-164	0.612352	0.577	0.383	3.49457e-160	3	SMCHD1
EVL2	3.16917e-163	0.55193	0.574	0.347	1.06288e-158	3	EVL
ANKRD122	4.17894e-159	0.659747	0.741	0.614	1.40153e-154	3	ANKRD12
RAC22	1.1252e-150	0.427439	0.698	0.44	3.77368e-146	3	RAC2
GPSM32	2.6598e-148	0.566767	0.62	0.414	8.92044e-144	3	GPSM3
FYN2	2.74574e-148	0.564318	0.427	0.231	9.20866e-144	3	FYN
ZFAS1	3.00097e-148	0.626921	0.701	0.584	1.00647e-143	3	ZFAS1
CDC42SE22	9.87244e-148	0.583583	0.499	0.303	3.31102e-143	3	CDC42SE2
ARID5A1	6.55236e-142	0.706866	0.477	0.305	2.19753e-137	3	ARID5A
AES2	4.4075e-138	0.580206	0.697	0.57	1.47819e-133	3	AES
TMEM243	9.85907e-138	0.659637	0.443	0.278	3.30654e-133	3	TMEM243
ICAM32	2.73165e-137	0.481641	0.481	0.277	9.16139e-133	3	ICAM3
COX7C	3.67449e-134	0.440272	0.891	0.837	1.23235e-129	3	COX7C
SEPT62	1.39287e-133	0.594624	0.465	0.288	4.67141e-129	3	SEPT6
EPB41	4.5372e-131	0.541144	0.304	0.145	1.52169e-126	3	EPB41
NOSIP1	6.5058e-131	0.855693	0.442	0.3	2.18192e-126	3	NOSIP
HLA-E2	2.79727e-129	0.338643	0.97	0.888	9.38147e-125	3	HLA-E
UBALD22	7.13235e-126	0.576813	0.604	0.45	2.39205e-121	3	UBALD2
KLRB11	9.33458e-123	0.728183	0.302	0.139	3.13063e-118	3	KLRB1
CORO1A2	1.38136e-122	0.325598	0.757	0.493	4.6328e-118	3	CORO1A
STK17A2	1.68925e-121	0.523393	0.602	0.418	5.66542e-117	3	STK17A
C12orf571	1.88285e-121	0.480222	0.769	0.605	6.31469e-117	3	C12orf57
FKBP51	1.62674e-120	0.631445	0.45	0.29	5.45576e-116	3	FKBP5
TAGAP2	1.66899e-120	0.469947	0.535	0.331	5.59745e-116	3	TAGAP
EVI2A2	2.64957e-119	0.554114	0.368	0.206	8.88613e-115	3	EVI2A
PFDN5	2.476e-117	0.370255	0.94	0.879	8.30402e-113	3	PFDN5
ARHGAP151	2.17835e-112	0.523476	0.3	0.151	7.30573e-108	3	ARHGAP15
SEPT12	4.31243e-111	0.433864	0.387	0.215	1.4463e-106	3	SEPT1
YPEL52	3.22849e-110	0.633909	0.6	0.483	1.08277e-105	3	YPEL5
PTGER43	3.82656e-109	0.541889	0.462	0.29	1.28335e-104	3	PTGER4
RSBN12	2.60955e-108	0.59074	0.4	0.245	8.75191e-104	3	RSBN1
TTC39C1	8.42243e-108	0.508634	0.297	0.15	2.82471e-103	3	TTC39C
RORA2	1.2168e-107	0.479351	0.41	0.237	4.08092e-103	3	RORA
SLC38A11	1.40004e-106	0.420613	0.288	0.14	4.69544e-102	3	SLC38A1
TUBA4A2	4.19667e-106	0.41763	0.583	0.393	1.40748e-101	3	TUBA4A
RNF1251	5.07195e-106	0.469196	0.293	0.148	1.70103e-101	3	RNF125
TNFAIP32	9.25096e-106	0.464029	0.53	0.34	3.10259e-101	3	TNFAIP3
CDKN1B2	1.08612e-104	0.606946	0.487	0.346	3.64263e-100	3	CDKN1B
MCUB1	4.94409e-103	0.546915	0.428	0.282	1.65815e-98	3	MCUB
SRGN2	1.04676e-102	0.502378	0.944	0.765	3.51062e-98	3	SRGN
RPL36A	4.80585e-101	0.541016	0.623	0.529	1.61179e-96	3	RPL36A
CCND32	5.75779e-99	0.505301	0.455	0.303	1.93105e-94	3	CCND3
CREM2	6.25178e-99	0.649722	0.521	0.377	2.09672e-94	3	CREM
ZFP36L22	1.61287e-97	0.428547	0.885	0.802	5.40925e-93	3	ZFP36L2
RGS102	1.70009e-97	0.44322	0.576	0.405	5.70175e-93	3	RGS10
TBC1D10C2	3.34436e-97	0.339264	0.344	0.18	1.12163e-92	3	TBC1D10C
BCL21	3.58595e-97	0.478401	0.325	0.179	1.20266e-92	3	BCL2
NCK21	8.52653e-97	0.468618	0.311	0.171	2.85963e-92	3	NCK2
GTF2B2	1.26869e-96	0.605834	0.52	0.388	4.25492e-92	3	GTF2B
CD962	1.88473e-96	0.317774	0.285	0.135	6.32101e-92	3	CD96
NAP1L1	5.30842e-96	0.494329	0.712	0.627	1.78034e-91	3	NAP1L1
SF11	2.87367e-95	0.479452	0.633	0.539	9.63773e-91	3	SF1
SLC2A31	8.68749e-94	0.442995	0.613	0.458	2.91361e-89	3	SLC2A3
GMFG2	1.26345e-93	0.401901	0.702	0.531	4.23735e-89	3	GMFG
TMEM1231	2.27237e-93	0.539242	0.526	0.413	7.62107e-89	3	TMEM123
NSMCE3	1.02278e-92	0.585535	0.381	0.25	3.43021e-88	3	NSMCE3
GYPC2	1.60325e-92	0.492532	0.608	0.477	5.37699e-88	3	GYPC
MBP2	1.12647e-90	0.513871	0.465	0.319	3.77797e-86	3	MBP
EIF3H	1.52069e-90	0.487113	0.699	0.639	5.1001e-86	3	EIF3H
RGCC2	1.11385e-89	0.323379	0.689	0.473	3.73561e-85	3	RGCC
EIF3F	7.54028e-88	0.433159	0.74	0.667	2.52886e-83	3	EIF3F
NSD31	4.53042e-87	0.496494	0.562	0.456	1.51941e-82	3	NSD3
UGP21	2.38557e-86	0.619987	0.484	0.378	8.00071e-82	3	UGP2
PDE4B2	1.23016e-84	0.481014	0.416	0.268	4.12572e-80	3	PDE4B
EVI2B3	2.36751e-84	0.43089	0.492	0.336	7.94016e-80	3	EVI2B
HSPA82	1.62074e-83	0.330851	0.898	0.833	5.43564e-79	3	HSPA8
ERP291	2.57925e-83	0.44377	0.673	0.601	8.6503e-79	3	ERP29
RBM382	6.60278e-81	0.384297	0.345	0.201	2.21444e-76	3	RBM38
EIF4B	1.49474e-80	0.513899	0.594	0.508	5.01306e-76	3	EIF4B
IL2RG2	7.61653e-79	0.308973	0.451	0.279	2.55443e-74	3	IL2RG
CYLD1	1.21673e-78	0.500335	0.367	0.237	4.08068e-74	3	CYLD
RARRES32	2.74128e-78	0.358482	0.575	0.424	9.19371e-74	3	RARRES3
DDX242	4.3788e-78	0.431272	0.758	0.712	1.46856e-73	3	DDX24
TAF1D2	1.15873e-77	0.449142	0.597	0.507	3.88616e-73	3	TAF1D
PDCD42	4.28186e-77	0.501626	0.508	0.391	1.43605e-72	3	PDCD4
C6orf48	1.86705e-76	0.54248	0.395	0.282	6.2617e-72	3	C6orf48
PIM11	2.18214e-75	0.43339	0.319	0.193	7.31847e-71	3	PIM1
COX4I1	3.75206e-75	0.314332	0.905	0.855	1.25837e-70	3	COX4I1
GPRIN31	9.26008e-74	0.458111	0.275	0.158	3.10564e-69	3	GPRIN3
GCC22	3.51023e-73	0.480627	0.53	0.423	1.17726e-68	3	GCC2
PPP2R5C2	4.93909e-73	0.439018	0.486	0.363	1.65647e-68	3	PPP2R5C
TLK11	7.35835e-73	0.516976	0.39	0.275	2.46784e-68	3	TLK1
SNHG121	4.80051e-72	0.456185	0.286	0.169	1.61e-67	3	SNHG12
ATM	1.03792e-71	0.423432	0.325	0.204	3.48097e-67	3	ATM
SEPT91	1.23548e-70	0.435568	0.345	0.225	4.14356e-66	3	SEPT9
COMMD6	1.44987e-69	0.366882	0.817	0.763	4.86258e-65	3	COMMD6
ANP32B1	8.49298e-69	0.423585	0.662	0.595	2.84838e-64	3	ANP32B
ZC3HAV12	9.07679e-69	0.465569	0.39	0.269	3.04417e-64	3	ZC3HAV1
PBXIP11	1.28647e-67	0.419616	0.351	0.227	4.31456e-63	3	PBXIP1
TSTD12	2.41898e-67	0.409416	0.388	0.261	8.11278e-63	3	TSTD1
EEF2	5.67287e-67	0.395401	0.746	0.707	1.90257e-62	3	EEF2
TSPYL22	1.9466e-66	0.478465	0.346	0.227	6.52851e-62	3	TSPYL2
JUNB1	3.10411e-66	0.439883	0.935	0.871	1.04106e-61	3	JUNB
NDFIP1	5.24134e-65	0.524508	0.528	0.463	1.75784e-60	3	NDFIP1
SAMSN12	9.21941e-65	0.362783	0.488	0.335	3.092e-60	3	SAMSN1
CASP82	2.32291e-64	0.401452	0.297	0.18	7.79058e-60	3	CASP8
SRSF72	1.74937e-63	0.286177	0.732	0.671	5.86702e-59	3	SRSF7
SSR22	2.7569e-63	0.350728	0.731	0.685	9.24609e-59	3	SSR2
KLF21	5.07585e-63	0.596011	0.702	0.662	1.70234e-58	3	KLF2
KIAA15512	6.5865e-62	0.378107	0.495	0.376	2.20898e-57	3	KIAA1551
EML42	1.57412e-61	0.373348	0.496	0.381	5.27928e-57	3	EML4
AAK11	9.19091e-61	0.392965	0.418	0.312	3.08245e-56	3	AAK1
SNRPD22	7.70786e-59	0.358181	0.717	0.682	2.58506e-54	3	SNRPD2
EZR2	1.01246e-58	0.382633	0.608	0.481	3.39558e-54	3	EZR
PIK3R12	1.32023e-58	0.412181	0.509	0.404	4.42778e-54	3	PIK3R1
OCIAD22	3.26136e-58	0.380146	0.393	0.268	1.09379e-53	3	OCIAD2
GIMAP11	4.92141e-58	0.408245	0.34	0.226	1.65054e-53	3	GIMAP1
ZNF3311	8.39847e-58	0.342871	0.508	0.366	2.81668e-53	3	ZNF331
UQCRB	8.08789e-57	0.282599	0.845	0.805	2.71252e-52	3	UQCRB
RSL1D11	1.46944e-56	0.412511	0.585	0.531	4.9282e-52	3	RSL1D1
MALT1	7.4474e-54	0.390206	0.252	0.157	2.49771e-49	3	MALT1
SINHCAF	1.1966e-53	0.420851	0.297	0.199	4.01315e-49	3	SINHCAF
SLFN52	4.17438e-53	0.394169	0.341	0.233	1.4e-48	3	SLFN5
CMTM7	7.44412e-53	0.465591	0.266	0.173	2.49661e-48	3	CMTM7
UXT	4.12767e-52	0.406919	0.592	0.556	1.38434e-47	3	UXT
ARID4B1	4.22717e-50	0.409424	0.527	0.457	1.41771e-45	3	ARID4B
NSA2	1.11897e-49	0.44703	0.593	0.557	3.75281e-45	3	NSA2
FOXP1	2.89295e-49	0.422763	0.492	0.41	9.70237e-45	3	FOXP1
AC058791.11	2.46125e-48	0.385805	0.332	0.232	8.25455e-44	3	AC058791.1
GPBP12	3.36872e-48	0.397624	0.541	0.484	1.1298e-43	3	GPBP1
SOD1	6.78523e-48	0.345631	0.718	0.665	2.27563e-43	3	SOD1
RNF19A2	1.76577e-47	0.576417	0.453	0.372	5.92204e-43	3	RNF19A
ATP5MG2	3.3089e-47	0.2789	0.823	0.791	1.10974e-42	3	ATP5MG
LBH2	3.75075e-47	0.289799	0.409	0.29	1.25793e-42	3	LBH
HNRNPDL2	6.27645e-47	0.269623	0.804	0.77	2.105e-42	3	HNRNPDL
SVIP	1.66043e-45	0.412624	0.36	0.27	5.56875e-41	3	SVIP
CDKN2D2	3.72061e-44	0.346018	0.403	0.302	1.24782e-39	3	CDKN2D
HNRNPA01	9.77761e-43	0.419241	0.537	0.501	3.27921e-38	3	HNRNPA0
FAM177A11	2.38293e-42	0.550846	0.475	0.429	7.99188e-38	3	FAM177A1
BIN22	1.54869e-40	0.260262	0.32	0.22	5.19399e-36	3	BIN2
ARHGEF12	4.21362e-40	0.319328	0.314	0.224	1.41316e-35	3	ARHGEF1
CYCS2	2.26713e-39	0.421154	0.581	0.542	7.6035e-35	3	CYCS
RSRC22	1.08045e-38	0.357169	0.57	0.534	3.6236e-34	3	RSRC2
HMGN1	7.41371e-37	0.309178	0.645	0.597	2.48641e-32	3	HMGN1
NOP581	4.68268e-36	0.378972	0.361	0.289	1.57048e-31	3	NOP58
JUND2	5.09112e-36	0.328173	0.937	0.915	1.70746e-31	3	JUND
CCNH1	5.26029e-36	0.387739	0.406	0.339	1.7642e-31	3	CCNH
GSTK12	7.25316e-36	0.323553	0.608	0.576	2.43257e-31	3	GSTK1
[truncated: 28,905 more rows]
