# Supplementary material for: Integrating the characteristic genes of macrophage pseudotime analysis in single-cell RNA-seq to construct a prediction model of atherosclerosis
Source: Aging (Albany NY). 2023 Jul 8;15(13):6361–79. doi: 10.18632/aging.204856 (PMC10373969; doi:10.18632/aging.204856)
Supplement: Supplementary Table 2 [file aging-15-204856-s002.xlsx]

## Sheet: Sheet1
Supplementary Table 2. Marker genes of the 9 cell clusters.
	p_val	avg_log2FC	pct.1	pct.2	p_val_adj	cluster	gene
IL7R	0	2.67062	0.734	0.145	0	CD4T/NK	IL7R
LTB	0	2.09026	0.661	0.186	0	CD4T/NK	LTB
CD69	0	1.80871	0.844	0.328	0	CD4T/NK	CD69
KLRB1	0	1.79288	0.399	0.068	0	CD4T/NK	KLRB1
CD2	0	1.74163	0.768	0.214	0	CD4T/NK	CD2
IL32	0	1.56986	0.819	0.369	0	CD4T/NK	IL32
TRBC1	0	1.56262	0.484	0.133	0	CD4T/NK	TRBC1
ZFP36L2	0	1.4829	0.904	0.776	0	CD4T/NK	ZFP36L2
TSC22D3	0	1.47809	0.876	0.705	0	CD4T/NK	TSC22D3
TRAC	0	1.4444	0.7	0.223	0	CD4T/NK	TRAC
CXCR4	0	1.4191	0.861	0.473	0	CD4T/NK	CXCR4
TRBC2	0	1.40085	0.685	0.223	0	CD4T/NK	TRBC2
CD7	0	1.38997	0.434	0.104	0	CD4T/NK	CD7
BTG1	0	1.37052	0.961	0.861	0	CD4T/NK	BTG1
CCR7	0	1.34441	0.359	0.077	0	CD4T/NK	CCR7
DDIT4	0	1.32607	0.744	0.516	0	CD4T/NK	DDIT4
SOCS1	0	1.29499	0.517	0.204	0	CD4T/NK	SOCS1
CD3D	0	1.28439	0.667	0.198	0	CD4T/NK	CD3D
TNFAIP3	0	1.25908	0.551	0.288	0	CD4T/NK	TNFAIP3
CD3E	0	1.23782	0.644	0.181	0	CD4T/NK	CD3E
LEPROTL1	0	1.19649	0.648	0.384	0	CD4T/NK	LEPROTL1
CYTIP	0	1.19153	0.703	0.376	0	CD4T/NK	CYTIP
ACAP1	0	1.18156	0.506	0.173	0	CD4T/NK	ACAP1
SPOCK2	0	1.17798	0.456	0.109	0	CD4T/NK	SPOCK2
STK4	0	1.17785	0.708	0.434	0	CD4T/NK	STK4
CD52	0	1.16086	0.771	0.393	0	CD4T/NK	CD52
PTPRC	0	1.14742	0.918	0.524	0	CD4T/NK	PTPRC
CD3G	0	1.14228	0.6	0.18	0	CD4T/NK	CD3G
SARAF	0	1.11513	0.813	0.742	0	CD4T/NK	SARAF
STK17B	0	1.09728	0.715	0.44	0	CD4T/NK	STK17B
ETS1	0	1.07848	0.59	0.283	0	CD4T/NK	ETS1
IRF1	0	1.07749	0.733	0.554	0	CD4T/NK	IRF1
CRYBG1	0	1.06214	0.398	0.169	0	CD4T/NK	CRYBG1
CLEC2D	0	1.04082	0.406	0.13	0	CD4T/NK	CLEC2D
TXNIP	0	1.04074	0.838	0.727	0	CD4T/NK	TXNIP
CD48	0	1.03928	0.711	0.373	0	CD4T/NK	CD48
RHOH	0	1.03431	0.501	0.187	0	CD4T/NK	RHOH
RORA	0	1.03208	0.422	0.191	0	CD4T/NK	RORA
STK17A	0	1.03079	0.613	0.37	0	CD4T/NK	STK17A
BIRC3	0	1.0032	0.477	0.263	0	CD4T/NK	BIRC3
IKZF1	0	1.00251	0.41	0.164	0	CD4T/NK	IKZF1
GIMAP7	0	0.99091	0.616	0.35	0	CD4T/NK	GIMAP7
ARL4C	0	0.976936	0.67	0.375	0	CD4T/NK	ARL4C
EVL	0	0.971331	0.55	0.299	0	CD4T/NK	EVL
RAC2	0	0.966437	0.689	0.38	0	CD4T/NK	RAC2
DUSP2	0	0.959762	0.665	0.395	0	CD4T/NK	DUSP2
RGCC	0	0.954157	0.684	0.422	0	CD4T/NK	RGCC
CD247	0	0.946263	0.414	0.107	0	CD4T/NK	CD247
LCK	0	0.943447	0.474	0.139	0	CD4T/NK	LCK
GZMA	0	0.942262	0.526	0.23	0	CD4T/NK	GZMA
RPS29	0	0.940869	0.906	0.934	0	CD4T/NK	RPS29
BATF	0	0.938756	0.308	0.109	0	CD4T/NK	BATF
IL2RG	0	0.933437	0.502	0.221	0	CD4T/NK	IL2RG
SKAP1	0	0.932636	0.416	0.118	0	CD4T/NK	SKAP1
PTGER4	0	0.928777	0.44	0.255	0	CD4T/NK	PTGER4
CORO1A	0	0.927579	0.739	0.434	0	CD4T/NK	CORO1A
TUBA4A	0	0.925206	0.586	0.345	0	CD4T/NK	TUBA4A
PIK3IP1	0	0.909497	0.369	0.181	0	CD4T/NK	PIK3IP1
PRDM1	0	0.906147	0.411	0.226	0	CD4T/NK	PRDM1
FYB1	0	0.890516	0.624	0.351	0	CD4T/NK	FYB1
PPP1R2	0	0.887301	0.571	0.461	0	CD4T/NK	PPP1R2
SLA	0	0.881779	0.459	0.25	0	CD4T/NK	SLA
TRAT1	0	0.867689	0.315	0.071	0	CD4T/NK	TRAT1
ARHGDIB	0	0.864483	0.828	0.714	0	CD4T/NK	ARHGDIB
ICOS	0	0.861262	0.257	0.041	0	CD4T/NK	ICOS
ISG20	0	0.860873	0.497	0.255	0	CD4T/NK	ISG20
OXNAD1	0	0.859287	0.302	0.08	0	CD4T/NK	OXNAD1
TAGAP	0	0.857828	0.516	0.288	0	CD4T/NK	TAGAP
CD96	0	0.849599	0.329	0.085	0	CD4T/NK	CD96
RNF19A	0	0.848965	0.466	0.348	0	CD4T/NK	RNF19A
LDHB	0	0.848335	0.639	0.591	0	CD4T/NK	LDHB
KLF6	0	0.846133	0.831	0.777	0	CD4T/NK	KLF6
EML4	0	0.844698	0.498	0.353	0	CD4T/NK	EML4
EZR	0	0.83982	0.626	0.445	0	CD4T/NK	EZR
TENT5C	0	0.833708	0.333	0.13	0	CD4T/NK	TENT5C
RPSA	0	0.826663	0.887	0.909	0	CD4T/NK	RPSA
LAT	0	0.825333	0.365	0.116	0	CD4T/NK	LAT
LIMD2	0	0.808604	0.519	0.312	0	CD4T/NK	LIMD2
KIAA1551	0	0.807469	0.487	0.35	0	CD4T/NK	KIAA1551
SRSF7	0	0.80637	0.71	0.664	0	CD4T/NK	SRSF7
RPS27	0	0.80428	0.934	0.966	0	CD4T/NK	RPS27
SAMSN1	0	0.803732	0.507	0.292	0	CD4T/NK	SAMSN1
CNOT6L	0	0.799493	0.406	0.25	0	CD4T/NK	CNOT6L
EMB	0	0.783835	0.396	0.208	0	CD4T/NK	EMB
ICAM3	0	0.781735	0.454	0.236	0	CD4T/NK	ICAM3
TNFAIP8	0	0.769614	0.454	0.281	0	CD4T/NK	TNFAIP8
TRAF3IP3	0	0.764484	0.34	0.147	0	CD4T/NK	TRAF3IP3
RCAN3	0	0.751548	0.265	0.085	0	CD4T/NK	RCAN3
TBC1D10C	0	0.74814	0.36	0.135	0	CD4T/NK	TBC1D10C
RPL28	0	0.745637	0.952	0.975	0	CD4T/NK	RPL28
RPS3	0	0.742062	0.929	0.959	0	CD4T/NK	RPS3
FAM107B	0	0.736008	0.554	0.429	0	CD4T/NK	FAM107B
RPS19	0	0.733109	0.938	0.961	0	CD4T/NK	RPS19
PIM2	0	0.727177	0.278	0.105	0	CD4T/NK	PIM2
PTPN7	0	0.723101	0.287	0.134	0	CD4T/NK	PTPN7
PDE4B	0	0.71528	0.391	0.24	0	CD4T/NK	PDE4B
GBP5	0	0.71144	0.281	0.118	0	CD4T/NK	GBP5
RPS12	0	0.710343	0.95	0.974	0	CD4T/NK	RPS12
UBALD2	0	0.709686	0.533	0.435	0	CD4T/NK	UBALD2
TTC39C	0	0.709609	0.291	0.116	0	CD4T/NK	TTC39C
CASP8	0	0.707512	0.297	0.151	0	CD4T/NK	CASP8
BCL2	0	0.701803	0.291	0.155	0	CD4T/NK	BCL2
CDC42SE2	0	0.698975	0.434	0.276	0	CD4T/NK	CDC42SE2
FYN	0	0.696857	0.36	0.204	0	CD4T/NK	FYN
SEPT1	0	0.684698	0.366	0.179	0	CD4T/NK	SEPT1
ARHGAP15	0	0.678983	0.281	0.12	0	CD4T/NK	ARHGAP15
RPS15A	0	0.671286	0.928	0.961	0	CD4T/NK	RPS15A
RUNX3	0	0.663104	0.318	0.158	0	CD4T/NK	RUNX3
MALAT1	0	0.662326	0.999	0.996	0	CD4T/NK	MALAT1
RARRES3	0	0.642134	0.544	0.397	0	CD4T/NK	RARRES3
AES	0	0.636472	0.619	0.564	0	CD4T/NK	AES
FXYD5	0	0.617296	0.765	0.714	0	CD4T/NK	FXYD5
HCST	0	0.615481	0.704	0.457	0	CD4T/NK	HCST
RPS20	0	0.61471	0.843	0.897	0	CD4T/NK	RPS20
ALOX5AP	0	0.612633	0.483	0.291	0	CD4T/NK	ALOX5AP
GPSM3	0	0.611086	0.541	0.389	0	CD4T/NK	GPSM3
RPLP2	0	0.609001	0.927	0.967	0	CD4T/NK	RPLP2
RPL13	0	0.607317	0.959	0.981	0	CD4T/NK	RPL13
RPL13A	0	0.60529	0.917	0.952	0	CD4T/NK	RPL13A
RNF125	0	0.594231	0.258	0.123	0	CD4T/NK	RNF125
RPS27A	0	0.59215	0.949	0.975	0	CD4T/NK	RPS27A
PABPC1	0	0.590758	0.765	0.763	0	CD4T/NK	PABPC1
RPL30	0	0.585712	0.937	0.972	0	CD4T/NK	RPL30
RBM38	0	0.585621	0.324	0.172	0	CD4T/NK	RBM38
RHOF	0	0.58267	0.285	0.125	0	CD4T/NK	RHOF
RPS26	0	0.582064	0.911	0.949	0	CD4T/NK	RPS26
CD37	0	0.580307	0.69	0.442	0	CD4T/NK	CD37
HSPA8	0	0.57404	0.825	0.841	0	CD4T/NK	HSPA8
RPL39	0	0.568227	0.918	0.958	0	CD4T/NK	RPL39
RPS21	0	0.565313	0.878	0.918	0	CD4T/NK	RPS21
SRGN	0	0.563767	0.893	0.738	0	CD4T/NK	SRGN
SLC38A1	0	0.563562	0.252	0.115	0	CD4T/NK	SLC38A1
GMFG	0	0.563244	0.636	0.51	0	CD4T/NK	GMFG
JUND	0	0.550177	0.905	0.92	0	CD4T/NK	JUND
GZMM	0	0.546871	0.336	0.139	0	CD4T/NK	GZMM
RPS14	0	0.541464	0.936	0.971	0	CD4T/NK	RPS14
RPS2	0	0.540648	0.947	0.964	0	CD4T/NK	RPS2
RPS18	0	0.539657	0.934	0.968	0	CD4T/NK	RPS18
RIPOR2	0	0.53737	0.254	0.117	0	CD4T/NK	RIPOR2
CCL5	0	0.524286	0.554	0.295	0	CD4T/NK	CCL5
RPS25	0	0.514306	0.918	0.963	0	CD4T/NK	RPS25
EEF1B2	0	0.508497	0.844	0.889	0	CD4T/NK	EEF1B2
RPL21	0	0.508478	0.902	0.955	0	CD4T/NK	RPL21
RPL3	0	0.508275	0.916	0.95	0	CD4T/NK	RPL3
RPS16	0	0.500094	0.899	0.943	0	CD4T/NK	RPS16
RPS6	0	0.498729	0.911	0.952	0	CD4T/NK	RPS6
RPL41	0	0.480578	0.965	0.985	0	CD4T/NK	RPL41
RPL23A	0	0.479402	0.903	0.946	0	CD4T/NK	RPL23A
RPL14	0	0.473694	0.927	0.961	0	CD4T/NK	RPL14
RPLP1	0	0.457825	0.963	0.985	0	CD4T/NK	RPLP1
RPL19	0	0.453085	0.94	0.975	0	CD4T/NK	RPL19
HLA-A	0	0.453027	0.948	0.948	0	CD4T/NK	HLA-A
RPL18A	0	0.451571	0.921	0.962	0	CD4T/NK	RPL18A
PNRC1	0	0.450356	0.877	0.903	0	CD4T/NK	PNRC1
RPS28	0	0.449331	0.926	0.964	0	CD4T/NK	RPS28
GZMK	0	0.449147	0.394	0.194	0	CD4T/NK	GZMK
HLA-B	0	0.440216	0.965	0.94	0	CD4T/NK	HLA-B
TPT1	0	0.440134	0.951	0.984	0	CD4T/NK	TPT1
RPL11	0	0.4316	0.947	0.978	0	CD4T/NK	RPL11
RPS5	0	0.418417	0.883	0.93	0	CD4T/NK	RPS5
RPL32	0	0.417498	0.932	0.974	0	CD4T/NK	RPL32
RPS15	0	0.417332	0.932	0.968	0	CD4T/NK	RPS15
RPS7	0	0.414363	0.927	0.96	0	CD4T/NK	RPS7
HLA-C	0	0.411773	0.93	0.935	0	CD4T/NK	HLA-C
EEF1D	0	0.411154	0.848	0.895	0	CD4T/NK	EEF1D
EEF1A1	0	0.408024	0.972	0.988	0	CD4T/NK	EEF1A1
RPL34	0	0.40538	0.931	0.973	0	CD4T/NK	RPL34
B2M	0	0.4051	0.993	0.993	0	CD4T/NK	B2M
RPL18	0	0.402382	0.921	0.964	0	CD4T/NK	RPL18
RPL10A	0	0.401544	0.888	0.936	0	CD4T/NK	RPL10A
RPL36	0	0.400963	0.879	0.931	0	CD4T/NK	RPL36
RPS4X	0	0.395139	0.915	0.958	0	CD4T/NK	RPS4X
CALM1	0	0.378634	0.903	0.933	0	CD4T/NK	CALM1
RPL10	0	0.370178	0.966	0.985	0	CD4T/NK	RPL10
RPL35	0	0.356243	0.88	0.934	0	CD4T/NK	RPL35
TMSB4X	0	0.34704	0.963	0.978	0	CD4T/NK	TMSB4X
HLA-E	0	0.336887	0.908	0.887	0	CD4T/NK	HLA-E
RPL35A	0	0.332449	0.915	0.96	0	CD4T/NK	RPL35A
RPL6	0	0.329823	0.929	0.966	0	CD4T/NK	RPL6
FAU	0	0.260856	0.924	0.967	0	CD4T/NK	FAU
TNF	1.11687e-307	0.841082	0.309	0.161	3.74574e-303	CD4T/NK	TNF
RPL9	1.1169e-305	0.421845	0.897	0.948	3.74586e-301	CD4T/NK	RPL9
OCIAD2	6.53642e-305	0.591495	0.387	0.239	2.19219e-300	CD4T/NK	OCIAD2
RPL37	2.82636e-304	0.385815	0.911	0.96	9.47903e-300	CD4T/NK	RPL37
CD44	6.83889e-303	0.61121	0.621	0.506	2.29363e-298	CD4T/NK	CD44
RGS1	2.4224e-296	0.844659	0.435	0.28	8.12425e-292	CD4T/NK	RGS1
RPL38	9.3656e-295	0.471365	0.831	0.895	3.14103e-290	CD4T/NK	RPL38
CST7	2.95437e-294	0.292977	0.421	0.23	9.90837e-290	CD4T/NK	CST7
RPL29	1.74886e-293	0.312723	0.913	0.959	5.86532e-289	CD4T/NK	RPL29
RPLP0	3.69306e-289	0.353444	0.896	0.93	1.23858e-284	CD4T/NK	RPLP0
ELF1	4.23195e-287	0.660707	0.605	0.54	1.41931e-282	CD4T/NK	ELF1
ANKRD12	6.35991e-287	0.738997	0.644	0.614	2.13299e-282	CD4T/NK	ANKRD12
EIF1	7.4603e-287	0.28871	0.936	0.966	2.50204e-282	CD4T/NK	EIF1
LCP1	4.91323e-285	0.509348	0.603	0.437	1.6478e-280	CD4T/NK	LCP1
RPL7A	3.37898e-283	0.257808	0.929	0.965	1.13324e-278	CD4T/NK	RPL7A
RPL27A	2.10002e-281	0.493412	0.832	0.886	7.04306e-277	CD4T/NK	RPL27A
CTSW	9.75412e-277	0.730285	0.302	0.156	3.27134e-272	CD4T/NK	CTSW
PBXIP1	1.71068e-272	0.691017	0.33	0.204	5.73729e-268	CD4T/NK	PBXIP1
BIN2	1.84041e-271	0.565058	0.329	0.193	6.17237e-267	CD4T/NK	BIN2
SMCHD1	1.72652e-263	0.714643	0.473	0.369	5.79042e-259	CD4T/NK	SMCHD1
CD53	2.10324e-263	0.542151	0.539	0.399	7.05386e-259	CD4T/NK	CD53
SEPT6	5.5369e-263	0.655911	0.389	0.269	1.85697e-258	CD4T/NK	SEPT6
MBP	4.57795e-257	0.662129	0.42	0.298	1.53535e-252	CD4T/NK	MBP
GIMAP4	3.17742e-254	0.688079	0.469	0.347	1.06564e-249	CD4T/NK	GIMAP4
PDCD4	5.9455e-248	0.667793	0.47	0.374	1.994e-243	CD4T/NK	PDCD4
ITM2A	2.75936e-245	0.611082	0.455	0.31	9.25433e-241	CD4T/NK	ITM2A
SMAP2	1.06738e-244	0.549851	0.501	0.374	3.57978e-240	CD4T/NK	SMAP2
CCND3	2.71296e-238	0.574248	0.398	0.284	9.09873e-234	CD4T/NK	CCND3
JUNB	2.69329e-236	0.568746	0.876	0.873	9.03277e-232	CD4T/NK	JUNB
RPS3A	8.02002e-236	0.43249	0.918	0.961	2.68975e-231	CD4T/NK	RPS3A
TSTD1	1.81689e-235	0.54084	0.36	0.238	6.09348e-231	CD4T/NK	TSTD1
RPL26	2.07486e-235	0.268062	0.902	0.953	6.95866e-231	CD4T/NK	RPL26
CDKN2D	6.56964e-235	0.59387	0.397	0.279	2.20333e-230	CD4T/NK	CDKN2D
RPL24	1.0839e-230	0.269964	0.901	0.951	3.63519e-226	CD4T/NK	RPL24
AC058791.1	9.46896e-226	0.768162	0.322	0.211	3.1757e-221	CD4T/NK	AC058791.1
CYLD	2.82536e-217	0.640954	0.327	0.219	9.47569e-213	CD4T/NK	CYLD
PIM1	1.28095e-212	0.602121	0.282	0.174	4.29604e-208	CD4T/NK	PIM1
RSBN1	3.84988e-211	0.653396	0.334	0.228	1.29117e-206	CD4T/NK	RSBN1
GPR183	4.7698e-209	0.297203	0.505	0.347	1.59969e-204	CD4T/NK	GPR183
SYNE2	1.53857e-208	0.701768	0.417	0.299	5.16005e-204	CD4T/NK	SYNE2
RPL36AL	1.83812e-205	0.290398	0.844	0.906	6.16469e-201	CD4T/NK	RPL36AL
MT-CO1	6.81571e-203	0.41565	0.991	0.986	2.28585e-198	CD4T/NK	MT-CO1
DDX24	3.68852e-202	0.518687	0.698	0.719	1.23706e-197	CD4T/NK	DDX24
PPP2R5C	1.93259e-201	0.681804	0.439	0.348	6.48153e-197	CD4T/NK	PPP2R5C
UBA52	2.49343e-199	0.273713	0.874	0.94	8.36248e-195	CD4T/NK	UBA52
RPL27	1.42861e-196	0.358305	0.827	0.892	4.79126e-192	CD4T/NK	RPL27
RPS10	8.88887e-194	0.435303	0.738	0.792	2.98115e-189	CD4T/NK	RPS10
APBB1IP	4.07648e-193	0.511667	0.441	0.332	1.36717e-188	CD4T/NK	APBB1IP
PIK3R1	9.44799e-188	0.683994	0.47	0.391	3.16867e-183	CD4T/NK	PIK3R1
SLC2A3	1.13549e-186	0.60705	0.531	0.446	3.8082e-182	CD4T/NK	SLC2A3
DDX5	7.68632e-185	0.340651	0.84	0.877	2.57784e-180	CD4T/NK	DDX5
NCK2	1.05632e-184	0.55782	0.253	0.155	3.5427e-180	CD4T/NK	NCK2
ZC3HAV1	2.94789e-183	0.653986	0.349	0.253	9.88664e-179	CD4T/NK	ZC3HAV1
ABRACL	3.60715e-183	0.563421	0.47	0.396	1.20976e-178	CD4T/NK	ABRACL
MYL12A	1.78519e-182	0.35217	0.849	0.889	5.98718e-178	CD4T/NK	MYL12A
RSRP1	1.86097e-177	0.65464	0.589	0.564	6.24132e-173	CD4T/NK	RSRP1
CREM	2.68679e-177	0.649044	0.447	0.366	9.01097e-173	CD4T/NK	CREM
HINT1	3.53989e-177	0.384797	0.758	0.817	1.18721e-172	CD4T/NK	HINT1
RPL31	3.63949e-177	0.368199	0.797	0.863	1.22061e-172	CD4T/NK	RPL31
CDKN1B	6.93588e-174	0.620074	0.411	0.336	2.32616e-169	CD4T/NK	CDKN1B
IL10RA	5.15674e-167	0.603723	0.32	0.223	1.72947e-162	CD4T/NK	IL10RA
RPS4Y1	5.49258e-161	0.390658	0.73	0.735	1.8421e-156	CD4T/NK	RPS4Y1
APOBEC3G	2.85181e-158	0.569647	0.338	0.238	9.56438e-154	CD4T/NK	APOBEC3G
NPM1	6.13639e-158	0.344563	0.788	0.852	2.05802e-153	CD4T/NK	NPM1
SLFN5	6.23357e-153	0.606874	0.307	0.217	2.09062e-148	CD4T/NK	SLFN5
ARHGEF1	3.26526e-151	0.517464	0.297	0.207	1.0951e-146	CD4T/NK	ARHGEF1
DOK2	3.45541e-149	0.473	0.351	0.255	1.15888e-144	CD4T/NK	DOK2
NSD3	5.45575e-148	0.614679	0.488	0.454	1.82975e-143	CD4T/NK	NSD3
EVI2B	3.37433e-143	0.462013	0.415	0.322	1.13168e-138	CD4T/NK	EVI2B
RPL4	7.18287e-143	0.412222	0.743	0.814	2.40899e-138	CD4T/NK	RPL4
TOB1	4.58055e-139	0.750616	0.404	0.342	1.53622e-134	CD4T/NK	TOB1
NOP53	2.27531e-134	0.477787	0.631	0.657	7.63092e-130	CD4T/NK	NOP53
EVI2A	1.24069e-133	0.484349	0.279	0.195	4.16103e-129	CD4T/NK	EVI2A
TAF1D	9.71362e-126	0.570903	0.519	0.509	3.25775e-121	CD4T/NK	TAF1D
TSPYL2	2.13372e-124	0.668723	0.293	0.215	7.15606e-120	CD4T/NK	TSPYL2
NFKBIA	7.90351e-124	0.437209	0.798	0.8	2.65068e-119	CD4T/NK	NFKBIA
IQGAP2	1.33776e-123	0.450767	0.335	0.248	4.48656e-119	CD4T/NK	IQGAP2
RPS13	4.79113e-123	0.255281	0.913	0.961	1.60685e-118	CD4T/NK	RPS13
YWHAZ	1.28054e-122	0.377201	0.69	0.731	4.29469e-118	CD4T/NK	YWHAZ
ITGA4	8.10326e-121	0.56695	0.296	0.215	2.71767e-116	CD4T/NK	ITGA4
SYNRG	2.71474e-119	0.510365	0.281	0.204	9.10469e-115	CD4T/NK	SYNRG
SF1	1.16388e-116	0.559907	0.541	0.545	3.90342e-112	CD4T/NK	SF1
ANXA1	8.09835e-116	0.663901	0.787	0.845	2.71603e-111	CD4T/NK	ANXA1
RNF213	1.07075e-114	0.600796	0.46	0.419	3.59107e-110	CD4T/NK	RNF213
HNRNPA1	8.23618e-109	0.336032	0.712	0.778	2.76225e-104	CD4T/NK	HNRNPA1
LBH	1.0051e-107	0.367739	0.363	0.275	3.37091e-103	CD4T/NK	LBH
YPEL5	1.81194e-106	0.553787	0.497	0.488	6.07687e-102	CD4T/NK	YPEL5
CCND2	7.44659e-106	0.528829	0.337	0.273	2.49744e-101	CD4T/NK	CCND2
GTF2B	1.01698e-105	0.516086	0.428	0.385	3.41076e-101	CD4T/NK	GTF2B
ARF6	1.3104e-104	0.497096	0.43	0.392	4.39481e-100	CD4T/NK	ARF6
SEPT9	9.45314e-104	0.448746	0.284	0.215	3.17039e-99	CD4T/NK	SEPT9
HLA-F	1.52976e-103	0.451745	0.515	0.491	5.1305e-99	CD4T/NK	HLA-F
ADGRE5	2.18726e-102	0.534091	0.317	0.249	7.33562e-98	CD4T/NK	ADGRE5
NCL	9.36359e-98	0.353737	0.746	0.812	3.14036e-93	CD4T/NK	NCL
H2AFZ	5.9819e-96	0.510919	0.68	0.749	2.00621e-91	CD4T/NK	H2AFZ
GSTK1	5.9212e-95	0.47217	0.559	0.583	1.98585e-90	CD4T/NK	GSTK1
GPR65	6.84788e-95	0.403207	0.283	0.211	2.29664e-90	CD4T/NK	GPR65
JAK1	1.56625e-94	0.442285	0.581	0.611	5.25289e-90	CD4T/NK	JAK1
DOCK8	1.30632e-93	0.442362	0.301	0.234	4.38115e-89	CD4T/NK	DOCK8
KIF2A	4.74145e-93	0.500133	0.342	0.287	1.59019e-88	CD4T/NK	KIF2A
KMT2E	2.30954e-89	0.497468	0.552	0.573	7.74572e-85	CD4T/NK	KMT2E
PFN1	9.58259e-88	0.253162	0.857	0.906	3.21381e-83	CD4T/NK	PFN1
SSR2	4.22453e-87	0.337341	0.645	0.701	1.41682e-82	CD4T/NK	SSR2
DNAJB1	2.66597e-86	0.531391	0.522	0.489	8.94112e-82	CD4T/NK	DNAJB1
CKLF	2.82143e-86	0.501266	0.455	0.435	9.46251e-82	CD4T/NK	CKLF
G3BP2	1.30126e-85	0.518698	0.438	0.424	4.36416e-81	CD4T/NK	G3BP2
SH3KBP1	1.12278e-84	0.424643	0.361	0.309	3.76558e-80	CD4T/NK	SH3KBP1
AAK1	5.93156e-83	0.532681	0.352	0.307	1.98933e-78	CD4T/NK	AAK1
GPBP1	6.58424e-83	0.50568	0.485	0.488	2.20822e-78	CD4T/NK	GPBP1
HNRNPDL	5.52499e-82	0.307507	0.718	0.788	1.85297e-77	CD4T/NK	HNRNPDL
UBE2S	2.43064e-79	0.52788	0.43	0.414	8.15186e-75	CD4T/NK	UBE2S
CIB1	1.27761e-78	0.404012	0.551	0.579	4.28484e-74	CD4T/NK	CIB1
DUSP5	2.46613e-78	0.449551	0.294	0.234	8.2709e-74	CD4T/NK	DUSP5
ARID5A	5.16075e-78	0.489321	0.346	0.305	1.73081e-73	CD4T/NK	ARID5A
MZT2A	5.50219e-78	0.469689	0.403	0.384	1.84532e-73	CD4T/NK	MZT2A
TERF2IP	3.38853e-77	0.372636	0.575	0.615	1.13645e-72	CD4T/NK	TERF2IP
RGS10	5.15366e-77	0.286179	0.46	0.4	1.72843e-72	CD4T/NK	RGS10
TOMM7	5.65503e-77	0.267683	0.77	0.843	1.89658e-72	CD4T/NK	TOMM7
FUS	3.0609e-75	0.466882	0.629	0.678	1.02656e-70	CD4T/NK	FUS
ARID4B	1.72772e-71	0.506209	0.462	0.461	5.79443e-67	CD4T/NK	ARID4B
ARPC5L	6.96366e-69	0.43829	0.432	0.412	2.33547e-64	CD4T/NK	ARPC5L
C9orf78	9.51565e-69	0.470806	0.457	0.462	3.19136e-64	CD4T/NK	C9orf78
HNRNPA2B1	8.10082e-68	0.264587	0.804	0.871	2.71685e-63	CD4T/NK	HNRNPA2B1
EPC1	1.94275e-67	0.510562	0.376	0.351	6.51559e-63	CD4T/NK	EPC1
LSP1	9.59556e-67	0.267408	0.457	0.389	3.21816e-62	CD4T/NK	LSP1
RBM39	7.4035e-63	0.380249	0.65	0.719	2.48299e-58	CD4T/NK	RBM39
GCC2	4.81764e-59	0.527543	0.433	0.427	1.61574e-54	CD4T/NK	GCC2
SNRPD2	1.66195e-58	0.31697	0.626	0.702	5.57383e-54	CD4T/NK	SNRPD2
TLK1	4.0762e-58	0.466668	0.307	0.273	1.36708e-53	CD4T/NK	TLK1
MDFIC	1.33798e-57	0.455961	0.277	0.238	4.4873e-53	CD4T/NK	MDFIC
SFPQ	3.34175e-57	0.399219	0.576	0.622	1.12076e-52	CD4T/NK	SFPQ
SUB1	3.68516e-57	0.278795	0.667	0.748	1.23593e-52	CD4T/NK	SUB1
MCUB	6.18256e-56	0.369384	0.318	0.282	2.07351e-51	CD4T/NK	MCUB
CITED2	9.37745e-55	0.589736	0.395	0.375	3.14501e-50	CD4T/NK	CITED2
PSMB9	6.8448e-53	0.342976	0.53	0.544	2.29561e-48	CD4T/NK	PSMB9
BTG2	2.51695e-52	0.279266	0.635	0.637	8.44133e-48	CD4T/NK	BTG2
HMGN1	2.94678e-51	0.3512	0.566	0.611	9.88293e-47	CD4T/NK	HMGN1
FKBP5	2.03673e-50	0.468654	0.322	0.292	6.83078e-46	CD4T/NK	FKBP5
PIP4K2A	3.00212e-50	0.409762	0.331	0.301	1.00685e-45	CD4T/NK	PIP4K2A
UCP2	1.41876e-49	0.31667	0.341	0.293	4.75825e-45	CD4T/NK	UCP2
HMOX2	1.08443e-48	0.386346	0.258	0.221	3.63697e-44	CD4T/NK	HMOX2
PRPF38B	8.77354e-48	0.492437	0.418	0.423	2.94247e-43	CD4T/NK	PRPF38B
RSRC2	2.36404e-47	0.431836	0.506	0.545	7.92853e-43	CD4T/NK	RSRC2
SNHG8	4.46185e-46	0.398172	0.49	0.518	1.49642e-41	CD4T/NK	SNHG8
HCLS1	4.73704e-46	0.31297	0.363	0.322	1.58871e-41	CD4T/NK	HCLS1
NSMCE3	4.19883e-45	0.425387	0.279	0.251	1.4082e-40	CD4T/NK	NSMCE3
NOP58	7.16437e-44	0.441905	0.31	0.287	2.40279e-39	CD4T/NK	NOP58
CLEC2B	1.08659e-41	0.423767	0.447	0.435	3.6442e-37	CD4T/NK	CLEC2B
CSK	9.53454e-41	0.322139	0.265	0.23	3.1977e-36	CD4T/NK	CSK
DNAJA1	1.06614e-39	0.353289	0.656	0.73	3.57562e-35	CD4T/NK	DNAJA1
ANP32E	2.87724e-39	0.449969	0.364	0.363	9.64969e-35	CD4T/NK	ANP32E
BUB3	8.04339e-39	0.414012	0.344	0.338	2.69759e-34	CD4T/NK	BUB3
MCL1	4.38355e-38	0.363914	0.593	0.637	1.47016e-33	CD4T/NK	MCL1
SRSF2	8.15143e-38	0.448652	0.492	0.539	2.73383e-33	CD4T/NK	SRSF2
TGFB1	1.63394e-37	0.391226	0.454	0.471	5.4799e-33	CD4T/NK	TGFB1
RBM25	3.0579e-37	0.36727	0.54	0.596	1.02556e-32	CD4T/NK	RBM25
GYPC	3.92886e-37	0.290485	0.481	0.485	1.31766e-32	CD4T/NK	GYPC
TMEM243	2.48666e-36	0.396548	0.301	0.283	8.33976e-32	CD4T/NK	TMEM243
APRT	3.0073e-36	0.297341	0.569	0.636	1.00859e-31	CD4T/NK	APRT
USP15	3.38389e-35	0.441592	0.402	0.411	1.13489e-30	CD4T/NK	USP15
FNBP1	2.89115e-33	0.395396	0.323	0.307	9.69633e-29	CD4T/NK	FNBP1
CELF2	4.21433e-33	0.391541	0.324	0.306	1.4134e-28	CD4T/NK	CELF2
GTF3A	1.02407e-32	0.367282	0.459	0.501	3.43454e-28	CD4T/NK	GTF3A
CCNH	1.28525e-32	0.436914	0.346	0.342	4.31046e-28	CD4T/NK	CCNH
RAN	3.93932e-31	0.288727	0.617	0.71	1.32117e-26	CD4T/NK	RAN
STMN1	5.69525e-31	0.432192	0.23	0.32	1.91007e-26	CD4T/NK	STMN1
TUT4	3.07329e-30	0.438563	0.33	0.319	1.03072e-25	CD4T/NK	TUT4
IDI1	4.05524e-29	0.348587	0.294	0.276	1.36005e-24	CD4T/NK	IDI1
SIGIRR	2.92914e-28	0.40291	0.356	0.36	9.82375e-24	CD4T/NK	SIGIRR
NOSIP	2.95079e-28	0.494482	0.306	0.309	9.89635e-24	CD4T/NK	NOSIP
GIMAP1	3.96885e-28	0.300542	0.255	0.225	1.33107e-23	CD4T/NK	GIMAP1
ORAI1	5.36113e-28	0.295044	0.267	0.243	1.79801e-23	CD4T/NK	ORAI1
ID2	9.03e-28	0.513006	0.423	0.431	3.02848e-23	CD4T/NK	ID2
BAZ1A	3.29026e-27	0.364603	0.322	0.311	1.10349e-22	CD4T/NK	BAZ1A
FAM177A1	3.67067e-27	0.46505	0.408	0.439	1.23107e-22	CD4T/NK	FAM177A1
CCSER2	9.72734e-27	0.401788	0.32	0.31	3.26235e-22	CD4T/NK	CCSER2
SS18L2	8.91454e-26	0.326305	0.279	0.267	2.98976e-21	CD4T/NK	SS18L2
ANP32B	7.02974e-25	0.320487	0.538	0.618	2.35763e-20	CD4T/NK	ANP32B
CYCS	4.34282e-24	0.264495	0.505	0.556	1.45649e-19	CD4T/NK	CYCS
BRD2	1.13588e-23	0.424192	0.399	0.42	3.80952e-19	CD4T/NK	BRD2
HMGB2	2.12938e-23	0.555061	0.38	0.401	7.14151e-19	CD4T/NK	HMGB2
UBE2D2	3.38929e-23	0.291453	0.531	0.61	1.1367e-18	CD4T/NK	UBE2D2
CNN2	7.78641e-23	0.3156	0.291	0.278	2.6114e-18	CD4T/NK	CNN2
SVIP	9.14216e-23	0.335602	0.285	0.272	3.0661e-18	CD4T/NK	SVIP
AKIRIN1	9.90542e-22	0.355485	0.294	0.289	3.32208e-17	CD4T/NK	AKIRIN1
PRRC2C	1.43768e-21	0.318593	0.58	0.666	4.8217e-17	CD4T/NK	PRRC2C
CLPP	5.56942e-21	0.362868	0.296	0.3	1.86787e-16	CD4T/NK	CLPP
UGP2	6.14577e-21	0.444253	0.366	0.39	2.06117e-16	CD4T/NK	UGP2
FGFR1OP2	6.76953e-20	0.379236	0.375	0.402	2.27037e-15	CD4T/NK	FGFR1OP2
HNRNPF	1.5887e-19	0.288386	0.493	0.558	5.32817e-15	CD4T/NK	HNRNPF
TMEM123	5.62093e-19	0.348665	0.395	0.428	1.88515e-14	CD4T/NK	TMEM123
CDC42SE1	6.43204e-19	0.339402	0.338	0.344	2.15718e-14	CD4T/NK	CDC42SE1
REL	7.28543e-19	0.269957	0.468	0.472	2.44339e-14	CD4T/NK	REL
OPTN	3.651e-17	0.315114	0.31	0.308	1.22447e-12	CD4T/NK	OPTN
RBM8A	5.04605e-17	0.268246	0.559	0.65	1.69234e-12	CD4T/NK	RBM8A
CMC2	2.27868e-16	0.317103	0.271	0.268	7.64222e-12	CD4T/NK	CMC2
EIF5	4.21723e-16	0.287364	0.55	0.628	1.41438e-11	CD4T/NK	EIF5
CCNL1	8.26266e-16	0.336559	0.487	0.542	2.77113e-11	CD4T/NK	CCNL1
HIGD2A	1.1485e-15	0.25661	0.535	0.603	3.85185e-11	CD4T/NK	HIGD2A
KLF2	3.09516e-15	0.364204	0.612	0.681	1.03806e-10	CD4T/NK	KLF2
NAP1L4	1.26092e-14	0.367358	0.305	0.317	4.22887e-10	CD4T/NK	NAP1L4
WIPF1	3.89141e-14	0.330106	0.275	0.272	1.3051e-09	CD4T/NK	WIPF1
SNHG15	5.17576e-14	0.336952	0.273	0.272	1.73585e-09	CD4T/NK	SNHG15
HSPE1	6.89307e-13	0.303442	0.537	0.626	2.3118e-08	CD4T/NK	HSPE1
TRA2B	8.58495e-12	0.313738	0.423	0.466	2.87922e-07	CD4T/NK	TRA2B
FNBP4	5.02298e-11	0.377582	0.288	0.296	1.68461e-06	CD4T/NK	FNBP4
DDX21	1.11684e-10	0.273092	0.528	0.595	3.74565e-06	CD4T/NK	DDX21
JPT1	1.41883e-10	0.321722	0.359	0.386	4.75847e-06	CD4T/NK	JPT1
PAXX	2.54526e-10	0.329756	0.306	0.321	8.5363e-06	CD4T/NK	PAXX
TANK	5.82653e-09	0.326451	0.284	0.298	0.00019541	CD4T/NK	TANK
CORO1B	1.19367e-08	0.485798	0.308	0.343	0.000400333	CD4T/NK	CORO1B
VAMP2	2.43269e-08	0.272115	0.479	0.546	0.000815876	CD4T/NK	VAMP2
HNRNPH1	2.79857e-08	0.339483	0.508	0.588	0.000938583	CD4T/NK	HNRNPH1
DDX6	4.14705e-08	0.325447	0.353	0.385	0.00139084	CD4T/NK	DDX6
CENPC	8.95651e-08	0.338793	0.268	0.278	0.00300383	CD4T/NK	CENPC
PPP1R10	1.25273e-07	0.423511	0.418	0.475	0.00420142	CD4T/NK	PPP1R10
KLF13	3.04185e-07	0.300686	0.35	0.383	0.0102018	CD4T/NK	KLF13
URI1	3.76921e-07	0.298459	0.272	0.285	0.0126412	CD4T/NK	URI1
IDS	4.32686e-07	0.36224	0.362	0.401	0.0145114	CD4T/NK	IDS
H2AFV	8.01419e-07	0.329864	0.43	0.506	0.026878	CD4T/NK	H2AFV
AKAP13	8.78241e-07	0.278408	0.468	0.528	0.0294545	CD4T/NK	AKAP13
BTG3	1.22146e-06	0.31939	0.315	0.34	0.0409653	CD4T/NK	BTG3
TGIF1	1.65848e-06	0.325659	0.274	0.29	0.0556222	CD4T/NK	TGIF1
INTS6	2.0766e-06	0.265444	0.229	0.278	0.0696452	CD4T/NK	INTS6
BAX	2.32571e-06	0.261266	0.355	0.456	0.0779998	CD4T/NK	BAX
DNAJB9	4.36927e-06	0.287466	0.253	0.266	0.146537	CD4T/NK	DNAJB9
SP100	7.14333e-06	0.30687	0.459	0.534	0.239573	CD4T/NK	SP100
NKTR	7.99043e-06	0.364731	0.324	0.348	0.267983	CD4T/NK	NKTR
TNFRSF14	1.06851e-05	0.268875	0.258	0.271	0.358355	CD4T/NK	TNFRSF14
C1orf56	1.14677e-05	0.347579	0.26	0.272	0.384603	CD4T/NK	C1orf56
RAB11FIP1	1.22064e-05	0.285241	0.293	0.307	0.409377	CD4T/NK	RAB11FIP1
N4BP2L2	3.61516e-05	0.331005	0.52	0.614	1	CD4T/NK	N4BP2L2
SRSF3	3.91216e-05	0.274898	0.539	0.649	1	CD4T/NK	SRSF3
PNN	4.24726e-05	0.32941	0.43	0.498	1	CD4T/NK	PNN
KMT2A	9.0516e-05	0.32836	0.36	0.399	1	CD4T/NK	KMT2A
DDIT3	0.000101569	0.284569	0.247	0.257	1	CD4T/NK	DDIT3
HNRNPA0	0.000121228	0.268099	0.441	0.522	1	CD4T/NK	HNRNPA0
AMD1	0.000123359	0.289365	0.394	0.448	1	CD4T/NK	AMD1
RNMT	0.000146658	0.352787	0.349	0.391	1	CD4T/NK	RNMT
CLDND1	0.000193563	0.2946	0.261	0.323	1	CD4T/NK	CLDND1
SP110	0.000229987	0.283916	0.342	0.374	1	CD4T/NK	SP110
MIER1	0.000312306	0.287092	0.38	0.433	1	CD4T/NK	MIER1
CYTOR	0.000596864	0.290427	0.29	0.31	1	CD4T/NK	CYTOR
TRA2A	0.000679143	0.25546	0.264	0.321	1	CD4T/NK	TRA2A
GSPT1	0.000897724	0.33924	0.339	0.389	1	CD4T/NK	GSPT1
ANKRD28	0.000955834	0.370104	0.22	0.266	1	CD4T/NK	ANKRD28
NR3C1	0.00304545	0.436072	0.353	0.415	1	CD4T/NK	NR3C1
HIST1H4C	0.00766042	0.457149	0.393	0.482	1	CD4T/NK	HIST1H4C
CLK1	0.00936072	0.293825	0.299	0.333	1	CD4T/NK	CLK1
TPSAB1	0	7.07938	0.957	0.005	0	Mast	TPSAB1
TPSB2	0	6.01563	0.939	0.005	0	Mast	TPSB2
CPA3	0	5.58989	0.95	0.002	0	Mast	CPA3
HPGD	0	4.6699	0.867	0.027	0	Mast	HPGD
MS4A2	0	4.01004	0.837	0.001	0	Mast	MS4A2
HPGDS	0	3.82877	0.871	0.021	0	Mast	HPGDS
GATA2	0	3.48587	0.744	0.044	0	Mast	GATA2
HDC	0	3.21203	0.744	0.001	0	Mast	HDC
CTSG	0	3.19643	0.289	0.002	0	Mast	CTSG
RHEX	0	3.00236	0.749	0.003	0	Mast	RHEX
KIT	0	2.97929	0.728	0.005	0	Mast	KIT
IL1RL1	0	2.88681	0.719	0.009	0	Mast	IL1RL1
VWA5A	0	2.79393	0.774	0.064	0	Mast	VWA5A
SLC18A2	0	2.5852	0.665	0.001	0	Mast	SLC18A2
RGS13	0	2.52234	0.677	0.005	0	Mast	RGS13
ADCYAP1	0	2.51303	0.333	0.001	0	Mast	ADCYAP1
LTC4S	0	2.37446	0.774	0.211	0	Mast	LTC4S
FCER1A	0	2.32937	0.69	0.028	0	Mast	FCER1A
TMEM176B	0	2.12398	0.772	0.172	0	Mast	TMEM176B
RAB27B	0	1.90893	0.523	0.014	0	Mast	RAB27B
LIF	0	1.6831	0.376	0.004	0	Mast	LIF
AL157895.1	0	1.65607	0.464	0.001	0	Mast	AL157895.1
BTK	0	1.61341	0.536	0.066	0	Mast	BTK
CALB2	0	1.47596	0.418	0	0	Mast	CALB2
MLPH	0	1.45428	0.47	0.023	0	Mast	MLPH
SMYD3	0	1.40844	0.468	0.065	0	Mast	SMYD3
MAOB	0	1.38278	0.452	0.028	0	Mast	MAOB
TPSD1	0	1.36072	0.4	0	0	Mast	TPSD1
ATP6V0A2	0	1.33884	0.457	0.053	0	Mast	ATP6V0A2
GCSAML	0	1.30347	0.385	0	0	Mast	GCSAML
PTGS1	0	1.20582	0.403	0.051	0	Mast	PTGS1
SLC45A3	0	1.20423	0.362	0.006	0	Mast	SLC45A3
KRT19	0	1.202	0.346	0.007	0	Mast	KRT19
STXBP6	0	1.12258	0.357	0.011	0	Mast	STXBP6
LAX1	0	1.10973	0.373	0.034	0	Mast	LAX1
CTTNBP2	0	0.988306	0.341	0.033	0	Mast	CTTNBP2
AREG	3.80739e-269	4.10014	0.717	0.204	1.27692e-264	Mast	AREG
TMEM154	5.87527e-260	1.343	0.43	0.065	1.97045e-255	Mast	TMEM154
CAVIN2	4.51953e-252	1.81166	0.573	0.12	1.51576e-247	Mast	CAVIN2
CPM	1.41494e-251	1.75362	0.489	0.094	4.74544e-247	Mast	CPM
HS6ST1	1.1883e-245	0.725334	0.258	0.025	3.98531e-241	Mast	HS6ST1
TNIK	1.09959e-230	0.961927	0.373	0.054	3.68779e-226	Mast	TNIK
ALOX5AP1	3.88371e-221	1.74892	0.846	0.332	1.30252e-216	Mast	ALOX5AP
FCER1G	5.74228e-210	1.33695	0.898	0.265	1.92585e-205	Mast	FCER1G
IL18R1	1.2231e-196	0.885988	0.306	0.042	4.10202e-192	Mast	IL18R1
ALOX5	7.58265e-192	1.26114	0.461	0.102	2.54307e-187	Mast	ALOX5
LMO4	1.41997e-190	1.93647	0.785	0.365	4.76231e-186	Mast	LMO4
PTGS2	3.76399e-188	1.88875	0.435	0.092	1.26237e-183	Mast	PTGS2
ALDH1A1	2.73838e-187	1.09959	0.416	0.083	9.184e-183	Mast	ALDH1A1
STX3	3.74482e-185	1.07968	0.376	0.069	1.25594e-180	Mast	STX3
ACSL4	1.68419e-183	1.44675	0.543	0.151	5.64844e-179	Mast	ACSL4
NFKBIZ	1.77567e-178	2.04665	0.676	0.262	5.95525e-174	Mast	NFKBIZ
ARHGAP18	4.74385e-170	1.64693	0.715	0.298	1.59099e-165	Mast	ARHGAP18
SERPINB1	1.69761e-169	2.01207	0.837	0.474	5.69344e-165	Mast	SERPINB1
DHRS9	1.03673e-168	1.10679	0.278	0.042	3.47699e-164	Mast	DHRS9
TMEM176A	6.76213e-165	1.23998	0.53	0.139	2.26788e-160	Mast	TMEM176A
CAPG	1.03961e-163	1.52398	0.711	0.286	3.48665e-159	Mast	CAPG
RPL36AL1	2.81554e-160	1.18877	0.948	0.891	9.44277e-156	Mast	RPL36AL
BMP2K	3.96625e-159	1.19097	0.482	0.129	1.3302e-154	Mast	BMP2K
FTH1	1.08471e-154	1.02397	1	0.977	3.6379e-150	Mast	FTH1
BATF1	6.18148e-150	1.33356	0.534	0.153	2.07315e-145	Mast	BATF
RHOBTB3	1.33688e-148	0.987538	0.378	0.083	4.48363e-144	Mast	RHOBTB3
RPL23	2.17891e-147	1.24435	0.939	0.859	7.30763e-143	Mast	RPL23
LAT2	8.586e-147	1.0176	0.439	0.111	2.87957e-142	Mast	LAT2
TESPA1	1.12088e-144	0.617737	0.263	0.04	3.7592e-140	Mast	TESPA1
SLC26A2	4.54188e-144	0.983675	0.317	0.061	1.52325e-139	Mast	SLC26A2
ASRGL1	2.40428e-141	0.715572	0.265	0.044	8.06349e-137	Mast	ASRGL1
SRGN1	1.7433e-137	1.36682	0.961	0.773	5.84669e-133	Mast	SRGN
LAPTM4A	5.13385e-136	1.42271	0.83	0.6	1.72179e-131	Mast	LAPTM4A
GMPR	2.41336e-134	0.745271	0.265	0.046	8.09392e-130	Mast	GMPR
ARHGEF6	3.5311e-133	0.990959	0.394	0.097	1.18426e-128	Mast	ARHGEF6
AKAP12	6.96696e-132	1.48262	0.437	0.119	2.33658e-127	Mast	AKAP12
LEO1	3.36519e-129	1.27165	0.464	0.14	1.12862e-124	Mast	LEO1
ANKRD281	3.03399e-128	1.47631	0.625	0.25	1.01754e-123	Mast	ANKRD28
GRAP2	4.3466e-127	0.551302	0.272	0.047	1.45776e-122	Mast	GRAP2
BIRC31	1.3483e-124	2.49062	0.658	0.31	4.52192e-120	Mast	BIRC3
SAMSN11	1.03698e-123	1.61754	0.699	0.34	3.47782e-119	Mast	SAMSN1
NFKBIA1	1.3742e-123	1.8688	0.9	0.799	4.60878e-119	Mast	NFKBIA
CSF1	2.66658e-121	1.35264	0.346	0.082	8.94316e-117	Mast	CSF1
IL18	3.51633e-121	1.01536	0.432	0.124	1.17931e-116	Mast	IL18
ALAS1	1.3365e-119	1.23068	0.328	0.076	4.48237e-115	Mast	ALAS1
RPL341	2.28912e-119	0.83671	0.987	0.963	7.67725e-115	Mast	RPL34
CD63	1.00321e-118	1.13165	0.918	0.712	3.36456e-114	Mast	CD63
ANXA12	1.0838e-114	1.39565	0.941	0.83	3.63486e-110	Mast	ANXA1
PLAT	8.29259e-114	1.10103	0.428	0.118	2.78117e-109	Mast	PLAT
ASAH1	1.13743e-112	1.40088	0.71	0.377	3.81471e-108	Mast	ASAH1
GNPTAB	4.05302e-112	0.989288	0.48	0.158	1.3593e-107	Mast	GNPTAB
ACER3	5.81048e-110	0.828535	0.33	0.082	1.94872e-105	Mast	ACER3
RPL37A	6.96228e-109	0.905291	0.937	0.917	2.33501e-104	Mast	RPL37A
RGS2	1.19587e-106	1.63985	0.665	0.317	4.01071e-102	Mast	RGS2
ITM2C	1.41037e-106	0.99944	0.561	0.205	4.7301e-102	Mast	ITM2C
ADRB2	3.42415e-106	1.08105	0.378	0.104	1.14839e-101	Mast	ADRB2
CD82	5.13903e-106	1.13117	0.493	0.174	1.72353e-101	Mast	CD82
CTNNBL1	1.08891e-104	1.10236	0.486	0.178	3.65198e-100	Mast	CTNNBL1
RAB32	5.45055e-104	1.33859	0.57	0.244	1.828e-99	Mast	RAB32
CD9	7.40688e-102	1.14503	0.79	0.452	2.48412e-97	Mast	CD9
ADGRE2	5.41724e-100	0.737823	0.305	0.074	1.81683e-95	Mast	ADGRE2
BACE2	1.62122e-99	1.042	0.432	0.14	5.43724e-95	Mast	BACE2
GLUL	6.63898e-99	1.60484	0.715	0.4	2.22658e-94	Mast	GLUL
FOSB	4.70228e-98	1.35734	0.805	0.558	1.57705e-93	Mast	FOSB
CD441	6.81408e-94	1.19548	0.776	0.531	2.28531e-89	Mast	CD44
GALC	1.11485e-92	0.746497	0.254	0.057	3.73898e-88	Mast	GALC
PTMA	1.43438e-91	0.594364	0.989	0.976	4.81061e-87	Mast	PTMA
LPCAT2	3.3018e-91	0.936889	0.425	0.148	1.10736e-86	Mast	LPCAT2
GPR651	1.76936e-90	1.30996	0.534	0.225	5.93407e-86	Mast	GPR65
NFKBID	1.18844e-89	1.22205	0.498	0.198	3.9858e-85	Mast	NFKBID
UBB	2.38123e-89	0.911775	0.898	0.857	7.98616e-85	Mast	UBB
CLIC1	2.45672e-87	0.861219	0.896	0.827	8.23934e-83	Mast	CLIC1
RPS6KA5	9.88047e-86	0.686029	0.294	0.075	3.31371e-81	Mast	RPS6KA5
FER	1.38631e-83	0.747702	0.281	0.073	4.64939e-79	Mast	FER
MSRA	3.45184e-83	0.900867	0.41	0.149	1.15768e-78	Mast	MSRA
PLIN2	7.55437e-83	1.07039	0.679	0.358	2.53358e-78	Mast	PLIN2
SQSTM1	9.74688e-81	1.16603	0.814	0.645	3.26891e-76	Mast	SQSTM1
SLC44A1	1.03015e-80	0.897269	0.36	0.12	3.4549e-76	Mast	SLC44A1
RHOH1	2.22227e-80	0.952048	0.599	0.259	7.45305e-76	Mast	RHOH
MEIS2	2.14689e-79	0.759118	0.265	0.067	7.20023e-75	Mast	MEIS2
PEBP1	7.76647e-79	1.0622	0.794	0.625	2.60472e-74	Mast	PEBP1
CD33	1.32238e-78	0.725924	0.289	0.081	4.43499e-74	Mast	CD33
RPL111	5.75793e-77	0.609247	0.987	0.97	1.93109e-72	Mast	RPL11
CNRIP1	7.65077e-77	0.772681	0.332	0.106	2.56591e-72	Mast	CNRIP1
RAC21	3.07223e-76	0.992343	0.747	0.451	1.03036e-71	Mast	RAC2
KLRG1	3.62985e-76	0.592274	0.319	0.088	1.21738e-71	Mast	KLRG1
FAU1	5.99472e-76	0.718192	0.978	0.956	2.01051e-71	Mast	FAU
ACOT7	2.26589e-74	0.689985	0.26	0.069	7.59934e-70	Mast	ACOT7
SELENOK	3.1049e-73	1.40532	0.78	0.63	1.04132e-68	Mast	SELENOK
CD691	8.20018e-73	1.15069	0.79	0.448	2.75017e-68	Mast	CD69
CPEB4	1.42905e-71	0.993255	0.425	0.171	4.79275e-67	Mast	CPEB4
VEGFA	1.69669e-71	1.08607	0.362	0.128	5.69037e-67	Mast	VEGFA
SGK1	3.20177e-71	1.28898	0.595	0.285	1.07381e-66	Mast	SGK1
RPL241	1.80748e-68	0.629711	0.955	0.939	6.06194e-64	Mast	RPL24
SYTL3	3.65917e-68	0.58864	0.38	0.127	1.22721e-63	Mast	SYTL3
CD84	3.88013e-68	0.843845	0.419	0.161	1.30132e-63	Mast	CD84
RPS11	9.6036e-68	0.721452	0.905	0.896	3.22086e-63	Mast	RPS11
TESC	1.44212e-67	0.773642	0.344	0.115	4.83659e-63	Mast	TESC
KCNQ1OT1	1.50179e-67	0.834499	0.308	0.096	5.0367e-63	Mast	KCNQ1OT1
ZNRF1	4.1005e-65	0.714571	0.33	0.111	1.37523e-60	Mast	ZNRF1
MITF	4.67578e-65	0.619426	0.26	0.076	1.56816e-60	Mast	MITF
CKLF1	3.00029e-64	0.976044	0.69	0.437	1.00624e-59	Mast	CKLF
MAPK6	1.17637e-63	0.798741	0.319	0.11	3.94531e-59	Mast	MAPK6
COBLL1	1.24744e-62	0.63655	0.305	0.1	4.18368e-58	Mast	COBLL1
PLGRKT	3.05295e-61	1.05518	0.398	0.168	1.0239e-56	Mast	PLGRKT
DUSP6	6.01561e-60	1.16189	0.489	0.238	2.01752e-55	Mast	DUSP6
RPL12	1.27121e-59	0.550968	0.971	0.954	4.26339e-55	Mast	RPL12
C4orf48	1.29956e-59	1.09321	0.518	0.266	4.35846e-55	Mast	C4orf48
RPL211	2.01057e-59	0.480997	0.961	0.942	6.74306e-55	Mast	RPL21
MBOAT7	2.24285e-56	0.659886	0.303	0.108	7.52205e-52	Mast	MBOAT7
LMNA	2.33931e-56	1.35647	0.719	0.56	7.84557e-52	Mast	LMNA
RPL301	3.40459e-56	0.545594	0.975	0.963	1.14183e-51	Mast	RPL30
TENT5A	7.8755e-56	1.15224	0.414	0.186	2.64129e-51	Mast	TENT5A
TDRD3	2.34135e-55	0.781903	0.29	0.102	7.85241e-51	Mast	TDRD3
ELF11	3.74417e-55	0.938284	0.728	0.554	1.25572e-50	Mast	ELF1
CTSD	3.12653e-52	0.526901	0.744	0.532	1.04858e-47	Mast	CTSD
HSPA5	3.91397e-52	1.67002	0.692	0.629	1.31267e-47	Mast	HSPA5
BHLHE40	5.50165e-52	0.951172	0.505	0.275	1.84514e-47	Mast	BHLHE40
STMN11	6.79449e-52	0.868271	0.536	0.296	2.27874e-47	Mast	STMN1
RGS101	3.20713e-51	0.976409	0.663	0.411	1.07561e-46	Mast	RGS10
HSP90AB1	6.30034e-51	0.646814	0.918	0.899	2.11301e-46	Mast	HSP90AB1
GADD45B	2.91731e-50	1.28256	0.767	0.639	9.78406e-46	Mast	GADD45B
DUSP14	3.35814e-50	0.727414	0.272	0.096	1.12625e-45	Mast	DUSP14
SEPT2	3.55251e-50	1.00373	0.59	0.414	1.19144e-45	Mast	SEPT2
TNFSF10	6.75605e-50	0.866523	0.595	0.345	2.26584e-45	Mast	TNFSF10
PPP1R15A	1.76203e-49	1.28991	0.726	0.649	5.9095e-45	Mast	PPP1R15A
ELL2	5.37155e-49	0.806694	0.373	0.163	1.80151e-44	Mast	ELL2
RPL371	9.50985e-49	0.490776	0.964	0.948	3.18941e-44	Mast	RPL37
AHR	2.42138e-48	0.863145	0.36	0.159	8.12081e-44	Mast	AHR
OSBPL8	1.18738e-47	0.940513	0.566	0.36	3.98222e-43	Mast	OSBPL8
KDM6B	1.28291e-47	0.922036	0.41	0.196	4.30262e-43	Mast	KDM6B
RPL101	1.84396e-47	0.434895	0.982	0.981	6.18426e-43	Mast	RPL10
RGS11	2.98542e-47	0.855928	0.579	0.315	1.00125e-42	Mast	RGS1
DNAJB91	4.20269e-47	0.96744	0.471	0.26	1.4095e-42	Mast	DNAJB9
FOXP1	4.74423e-47	0.947668	0.618	0.413	1.59112e-42	Mast	FOXP1
RPS201	9.74934e-47	0.627236	0.871	0.884	3.26973e-42	Mast	RPS20
ARMCX3	5.4596e-46	0.870954	0.48	0.267	1.83104e-41	Mast	ARMCX3
SSR4	1.4478e-45	0.744148	0.801	0.754	4.85562e-41	Mast	SSR4
EMILIN2	4.01677e-45	0.69583	0.348	0.148	1.34714e-40	Mast	EMILIN2
S100A4	1.20047e-44	0.658131	0.966	0.803	4.02614e-40	Mast	S100A4
S100A6	7.30176e-44	0.513533	0.973	0.897	2.44886e-39	Mast	S100A6
PAG1	2.80335e-43	0.699178	0.305	0.12	9.40188e-39	Mast	PAG1
RASSF5	7.54691e-43	0.599439	0.344	0.145	2.53108e-38	Mast	RASSF5
NEAT1	1.26806e-42	0.5202	0.86	0.755	4.25284e-38	Mast	NEAT1
SYAP1	1.37074e-42	1.21801	0.516	0.326	4.5972e-38	Mast	SYAP1
RPL321	2.08221e-42	0.374295	0.982	0.963	6.98331e-38	Mast	RPL32
PRDX1	7.61701e-42	0.79008	0.789	0.676	2.55459e-37	Mast	PRDX1
EFCAB14	2.61438e-41	0.805486	0.401	0.208	8.7681e-37	Mast	EFCAB14
RPL27A1	6.24941e-41	0.562046	0.873	0.873	2.09593e-36	Mast	RPL27A
CHPT1	7.91853e-41	0.763609	0.391	0.196	2.65572e-36	Mast	CHPT1
RPL22	1.03556e-40	0.533497	0.93	0.917	3.47308e-36	Mast	RPL22
RPS27A1	1.07661e-40	0.389909	0.984	0.968	3.61075e-36	Mast	RPS27A
RPL5	1.23781e-39	0.442261	0.941	0.944	4.15135e-35	Mast	RPL5
IRS2	1.39624e-39	0.603116	0.26	0.099	4.68271e-35	Mast	IRS2
ABCA1	4.77216e-39	0.68066	0.332	0.149	1.60049e-34	Mast	ABCA1
NR4A1	5.9505e-39	0.893253	0.566	0.361	1.99568e-34	Mast	NR4A1
TSTD11	6.62332e-39	0.770217	0.489	0.265	2.22133e-34	Mast	TSTD1
IL4R	2.7042e-38	0.512984	0.254	0.097	9.06935e-34	Mast	IL4R
PRDX6	3.5322e-38	0.885568	0.643	0.533	1.18463e-33	Mast	PRDX6
RPS291	5.02441e-38	0.421794	0.952	0.927	1.68509e-33	Mast	RPS29
TNFAIP31	1.06815e-37	0.988701	0.55	0.349	3.58235e-33	Mast	TNFAIP3
PAK1	1.58884e-37	0.617513	0.28	0.117	5.32866e-33	Mast	PAK1
AKAP131	1.75044e-37	0.856653	0.633	0.512	5.87063e-33	Mast	AKAP13
BEX4	2.24376e-37	0.73702	0.462	0.264	7.52513e-33	Mast	BEX4
MT-ND4	3.46408e-36	0.394836	0.975	0.972	1.16178e-31	Mast	MT-ND4
MT-ND2	1.57966e-35	0.551649	0.975	0.956	5.29787e-31	Mast	MT-ND2
ATP6V1F	4.85313e-35	0.748693	0.701	0.544	1.62764e-30	Mast	ATP6V1F
FXYD51	5.05691e-35	0.653755	0.805	0.725	1.69599e-30	Mast	FXYD5
BTG21	4.94059e-34	0.897202	0.726	0.635	1.65698e-29	Mast	BTG2
C21orf91	7.91232e-34	0.552477	0.308	0.138	2.65363e-29	Mast	C21orf91
CLCN3	9.43989e-34	0.634478	0.263	0.114	3.16595e-29	Mast	CLCN3
ZEB2	1.81321e-33	0.726251	0.532	0.332	6.08116e-29	Mast	ZEB2
FOSL2	2.06373e-33	0.746213	0.457	0.27	6.92133e-29	Mast	FOSL2
NACA	1.37029e-32	0.397954	0.95	0.934	4.59568e-28	Mast	NACA
SOCS11	6.13677e-32	0.828002	0.486	0.277	2.05815e-27	Mast	SOCS1
ING2	8.44548e-32	0.837266	0.412	0.233	2.83245e-27	Mast	ING2
PARP4	1.04516e-31	0.489807	0.265	0.115	3.50526e-27	Mast	PARP4
PLAUR	1.5074e-31	0.323225	0.502	0.273	5.05553e-27	Mast	PLAUR
SPECC1	2.24046e-31	0.578071	0.267	0.118	7.51405e-27	Mast	SPECC1
RPL381	2.97366e-31	0.446921	0.878	0.88	9.97307e-27	Mast	RPL38
RPL261	1.96946e-30	0.332546	0.95	0.94	6.60517e-26	Mast	RPL26
RPS4X1	4.63857e-30	0.347346	0.953	0.948	1.55568e-25	Mast	RPS4X
RPL35A1	2.31896e-29	0.391199	0.97	0.949	7.77734e-25	Mast	RPL35A
REL1	2.43087e-29	0.73876	0.624	0.47	8.15264e-25	Mast	REL
RPS251	3.03032e-29	0.358681	0.962	0.952	1.01631e-24	Mast	RPS25
H3F3B	1.53283e-28	0.380911	0.959	0.963	5.14079e-24	Mast	H3F3B
RPL391	3.49459e-28	0.42481	0.973	0.948	1.17202e-23	Mast	RPL39
MT-ND3	6.94312e-28	0.548446	0.978	0.957	2.32858e-23	Mast	MT-ND3
RPL7	8.10824e-28	0.462262	0.862	0.892	2.71934e-23	Mast	RPL7
SEC61B	2.19192e-27	0.786826	0.762	0.677	7.35125e-23	Mast	SEC61B
HSP90B1	2.22698e-27	0.864369	0.742	0.718	7.46886e-23	Mast	HSP90B1
CD371	3.06786e-27	0.45862	0.695	0.5	1.0289e-22	Mast	CD37
DBI	3.27898e-27	0.804545	0.715	0.592	1.09971e-22	Mast	DBI
SERP1	4.11628e-27	0.658543	0.728	0.647	1.38052e-22	Mast	SERP1
EMP3	4.64438e-27	0.566773	0.815	0.687	1.55763e-22	Mast	EMP3
SNX29	6.11072e-27	0.538299	0.269	0.129	2.04941e-22	Mast	SNX29
CAST	6.44515e-27	0.580698	0.742	0.691	2.16158e-22	Mast	CAST
SMIM3	8.6871e-27	0.554656	0.276	0.134	2.91348e-22	Mast	SMIM3
RPL141	1.01364e-26	0.334358	0.957	0.953	3.39953e-22	Mast	RPL14
PRKCB	1.65174e-26	0.449594	0.258	0.116	5.53961e-22	Mast	PRKCB
NDUFA4	4.66162e-26	0.678642	0.81	0.739	1.56341e-21	Mast	NDUFA4
RPS281	1.05225e-25	0.404584	0.968	0.955	3.52905e-21	Mast	RPS28
LAPTM5	1.56853e-25	0.588977	0.668	0.513	5.26052e-21	Mast	LAPTM5
SNHG81	1.85062e-25	0.736005	0.624	0.51	6.20661e-21	Mast	SNHG8
RPS261	2.18877e-25	0.432162	0.961	0.94	7.34068e-21	Mast	RPS26
RPS24	3.4022e-25	0.342292	0.982	0.967	1.14103e-20	Mast	RPS24
SNX5	4.15671e-25	0.65354	0.428	0.273	1.39408e-20	Mast	SNX5
PTPN6	5.00265e-25	0.471026	0.378	0.21	1.67779e-20	Mast	PTPN6
RPL91	1.89906e-24	0.356474	0.919	0.936	6.36905e-20	Mast	RPL9
SDF2L1	2.29905e-24	0.79274	0.434	0.293	7.71057e-20	Mast	SDF2L1
CXCL16	2.89685e-24	0.465526	0.353	0.192	9.71544e-20	Mast	CXCL16
RASGEF1B	6.21459e-24	0.758891	0.4	0.238	2.08425e-19	Mast	RASGEF1B
LGALS3	6.23376e-24	0.850706	0.754	0.592	2.09068e-19	Mast	LGALS3
DTNBP1	7.64456e-24	0.496523	0.301	0.16	2.56383e-19	Mast	DTNBP1
SEC11A	2.46076e-23	0.593692	0.661	0.574	8.25291e-19	Mast	SEC11A
DAD1	3.31162e-23	0.655144	0.726	0.647	1.11065e-18	Mast	DAD1
LAT1	7.10989e-23	0.371813	0.346	0.174	2.38451e-18	Mast	LAT
PHLDA2	7.7001e-23	0.666327	0.297	0.159	2.58246e-18	Mast	PHLDA2
CRBN	1.31093e-22	0.635598	0.428	0.281	4.3966e-18	Mast	CRBN
LXN	3.12155e-22	0.529966	0.258	0.131	1.0469e-17	Mast	LXN
CCL4L2	3.36985e-22	1.00052	0.446	0.269	1.13018e-17	Mast	CCL4L2
RPS23	3.66644e-22	0.291765	0.97	0.962	1.22965e-17	Mast	RPS23
TSC22D1	4.58834e-22	0.805249	0.446	0.29	1.53884e-17	Mast	TSC22D1
RPL311	5.3417e-22	0.398331	0.848	0.847	1.7915e-17	Mast	RPL31
BLVRA	8.4029e-22	0.638716	0.364	0.228	2.81816e-17	Mast	BLVRA
FKBP2	3.03758e-21	0.752698	0.606	0.512	1.01874e-16	Mast	FKBP2
FXR1	5.62847e-21	0.610134	0.495	0.36	1.88768e-16	Mast	FXR1
VPS37B	8.58478e-21	0.563574	0.26	0.134	2.87916e-16	Mast	VPS37B
RPS8	1.61308e-20	0.333647	0.971	0.966	5.40994e-16	Mast	RPS8
HSD17B4	1.93884e-20	0.440201	0.292	0.166	6.5025e-16	Mast	HSD17B4
RALB	2.55885e-20	0.494088	0.281	0.156	8.58189e-16	Mast	RALB
ICAM1	3.08773e-20	0.56823	0.289	0.159	1.03556e-15	Mast	ICAM1
SOX4	3.58498e-20	0.96458	0.355	0.22	1.20233e-15	Mast	SOX4
CANX	5.93474e-20	0.681886	0.554	0.468	1.99039e-15	Mast	CANX
RHBDD2	1.35449e-19	0.454351	0.289	0.16	4.54268e-15	Mast	RHBDD2
OST4	1.97094e-19	0.625637	0.794	0.747	6.61014e-15	Mast	OST4
EGR1	2.46494e-19	0.642404	0.45	0.293	8.26691e-15	Mast	EGR1
SDCBP	2.89988e-19	0.561622	0.661	0.589	9.72562e-15	Mast	SDCBP
RPS71	3.10998e-19	0.320321	0.962	0.952	1.04302e-14	Mast	RPS7
TNFAIP81	3.54388e-19	0.682232	0.453	0.321	1.18855e-14	Mast	TNFAIP8
LAIR1	4.83916e-19	0.440649	0.29	0.157	1.62296e-14	Mast	LAIR1
LACTB	5.59673e-19	0.518546	0.4	0.261	1.87703e-14	Mast	LACTB
EIF51	7.03789e-19	0.565839	0.652	0.609	2.36037e-14	Mast	EIF5
RPS131	9.25971e-19	0.412086	0.964	0.949	3.10552e-14	Mast	RPS13
TPST2	1.15101e-18	0.533875	0.319	0.193	3.86024e-14	Mast	TPST2
LDHB1	1.54789e-18	0.526729	0.665	0.602	5.1913e-14	Mast	LDHB
PROCR	3.24624e-18	0.294624	0.251	0.129	1.08872e-13	Mast	PROCR
SWAP70	5.55643e-18	0.456721	0.33	0.204	1.86351e-13	Mast	SWAP70
ATP5MC2	6.505e-18	0.521207	0.844	0.813	2.18165e-13	Mast	ATP5MC2
MPP1	1.0058e-17	0.455447	0.289	0.166	3.37325e-13	Mast	MPP1
JUND1	1.53122e-17	0.29404	0.925	0.916	5.13539e-13	Mast	JUND
LYL1	2.46944e-17	0.460863	0.256	0.146	8.282e-13	Mast	LYL1
MAPK1	2.8525e-17	0.496471	0.342	0.215	9.56671e-13	Mast	MAPK1
TIPARP	3.29353e-17	0.674003	0.432	0.317	1.10459e-12	Mast	TIPARP
CD83	4.55058e-17	0.332446	0.444	0.274	1.52617e-12	Mast	CD83
EIF3K	6.58884e-17	0.472709	0.803	0.778	2.20976e-12	Mast	EIF3K
SH3KBP11	7.48797e-17	0.528553	0.455	0.32	2.51132e-12	Mast	SH3KBP1
VAMP8	2.24284e-16	0.408569	0.609	0.421	7.52205e-12	Mast	VAMP8
PLK3	2.51191e-16	0.444466	0.317	0.196	8.42444e-12	Mast	PLK3
MT-ND4L	3.21647e-16	0.514524	0.724	0.661	1.07874e-11	Mast	MT-ND4L
COX17	9.09432e-16	0.855954	0.53	0.43	3.05005e-11	Mast	COX17
HLTF	9.27043e-16	0.450867	0.267	0.156	3.10912e-11	Mast	HLTF
PDIA3	1.16958e-15	0.634355	0.661	0.68	3.92253e-11	Mast	PDIA3
M6PR	1.44787e-15	0.490762	0.47	0.349	4.85586e-11	Mast	M6PR
HNRNPH11	1.67098e-15	0.82094	0.638	0.568	5.60413e-11	Mast	HNRNPH1
DNAJC3	1.90591e-15	0.730198	0.459	0.365	6.39204e-11	Mast	DNAJC3
NDEL1	2.239e-15	0.532971	0.262	0.155	7.50916e-11	Mast	NDEL1
AP1S2	2.66892e-15	0.481317	0.43	0.31	8.95101e-11	Mast	AP1S2
EXOSC8	6.15994e-15	0.673306	0.341	0.23	2.06592e-10	Mast	EXOSC8
CNIH1	1.39738e-14	0.630247	0.4	0.299	4.68653e-10	Mast	CNIH1
FDX1	1.72225e-14	0.821411	0.36	0.259	5.77608e-10	Mast	FDX1
SFT2D1	1.93497e-14	0.619953	0.36	0.259	6.48949e-10	Mast	SFT2D1
ATP6V0B	2.14139e-14	0.408521	0.656	0.551	7.18179e-10	Mast	ATP6V0B
TXN	2.20416e-14	0.695483	0.722	0.657	7.39231e-10	Mast	TXN
IDI11	2.82847e-14	0.416544	0.401	0.279	9.48612e-10	Mast	IDI1
PPP1R15B	3.2556e-14	0.444722	0.299	0.188	1.09186e-09	Mast	PPP1R15B
AC020916.1	4.56692e-14	0.790504	0.333	0.221	1.53165e-09	Mast	AC020916.1
MYADM	5.16973e-14	0.603991	0.547	0.474	1.73382e-09	Mast	MYADM
ARPC3	5.94925e-14	0.360711	0.839	0.804	1.99526e-09	Mast	ARPC3
MANF	8.20125e-14	0.605182	0.366	0.266	2.75053e-09	Mast	MANF
RNASEH2B	9.31335e-14	0.448425	0.349	0.236	3.12351e-09	Mast	RNASEH2B
MAPRE1	9.58407e-14	0.484486	0.362	0.26	3.21431e-09	Mast	MAPRE1
C1orf162	1.48603e-13	0.367632	0.353	0.222	4.98386e-09	Mast	C1orf162
CMPK1	1.65656e-13	0.438044	0.437	0.328	5.55577e-09	Mast	CMPK1
HIF1A	1.97226e-13	0.472335	0.489	0.381	6.61457e-09	Mast	HIF1A
NABP1	2.19745e-13	0.398726	0.332	0.218	7.3698e-09	Mast	NABP1
IFITM2	2.69642e-13	0.280638	0.817	0.77	9.04324e-09	Mast	IFITM2
SPINT2	2.85741e-13	0.346584	0.403	0.278	9.58318e-09	Mast	SPINT2
AHI1	4.29492e-13	0.393931	0.294	0.188	1.44043e-08	Mast	AHI1
SSR3	4.32121e-13	0.58044	0.557	0.475	1.44925e-08	Mast	SSR3
PRNP	7.74985e-13	0.475968	0.401	0.297	2.59914e-08	Mast	PRNP
NFE2L2	8.61605e-13	0.618929	0.581	0.534	2.88965e-08	Mast	NFE2L2
NUTM2B-AS1	1.95502e-12	0.381468	0.297	0.193	6.55675e-08	Mast	NUTM2B-AS1
BST2	2.28625e-12	0.34293	0.625	0.529	7.66763e-08	Mast	BST2
GPX4	2.7576e-12	0.353158	0.776	0.721	9.24844e-08	Mast	GPX4
AZIN1	3.01452e-12	0.366515	0.278	0.179	1.01101e-07	Mast	AZIN1
TSNAX	3.56892e-12	0.399123	0.297	0.197	1.19694e-07	Mast	TSNAX
STK17B1	5.01504e-12	0.465603	0.62	0.505	1.68194e-07	Mast	STK17B
RNF130	5.87977e-12	0.415122	0.434	0.325	1.97196e-07	Mast	RNF130
MT-ND1	2.22728e-11	0.26268	0.952	0.951	7.46987e-07	Mast	MT-ND1
MYLIP	2.27627e-11	0.311249	0.271	0.172	7.63416e-07	Mast	MYLIP
FERMT2	2.31028e-11	0.488154	0.308	0.206	7.74823e-07	Mast	FERMT2
NCF4	3.38265e-11	0.341113	0.287	0.183	1.13447e-06	Mast	NCF4
AKAP17A	3.45529e-11	0.332155	0.263	0.167	1.15883e-06	Mast	AKAP17A
DDX3X	3.9677e-11	0.442585	0.606	0.555	1.33069e-06	Mast	DDX3X
AGTRAP	3.97092e-11	0.388398	0.353	0.252	1.33177e-06	Mast	AGTRAP
CSNK1D	4.39465e-11	0.363296	0.297	0.201	1.47388e-06	Mast	CSNK1D
RBM8A1	4.57748e-11	0.53193	0.656	0.628	1.53519e-06	Mast	RBM8A
USP48	5.93489e-11	0.549005	0.283	0.194	1.99044e-06	Mast	USP48
ID21	8.73065e-11	0.656038	0.496	0.428	2.92809e-06	Mast	ID2
TFG	8.88804e-11	0.470704	0.369	0.283	2.98087e-06	Mast	TFG
PARVB	9.7924e-11	0.438492	0.263	0.177	3.28418e-06	Mast	PARVB
SKIL	1.20966e-10	0.558861	0.427	0.346	4.05696e-06	Mast	SKIL
ANXA11	1.44417e-10	0.476341	0.525	0.467	4.84347e-06	Mast	ANXA11
GRK2	1.55512e-10	0.289079	0.272	0.175	5.21555e-06	Mast	GRK2
HNRNPA2B11	2.04734e-10	0.333173	0.765	0.856	6.86637e-06	Mast	HNRNPA2B1
CD55	2.08186e-10	0.354639	0.486	0.39	6.98213e-06	Mast	CD55
PABPC4	2.08321e-10	0.403425	0.355	0.263	6.98667e-06	Mast	PABPC4
TAOK3	2.32194e-10	0.361436	0.401	0.302	7.78733e-06	Mast	TAOK3
NAP1L1	2.3649e-10	0.459033	0.638	0.631	7.9314e-06	Mast	NAP1L1
MT-ND5	3.17339e-10	0.250308	0.871	0.913	1.06429e-05	Mast	MT-ND5
HYI	3.69043e-10	0.384539	0.251	0.164	1.23769e-05	Mast	HYI
BTG31	3.79667e-10	0.473795	0.421	0.333	1.27333e-05	Mast	BTG3
NSMCE1	4.82596e-10	0.4623	0.301	0.218	1.61853e-05	Mast	NSMCE1
RBM391	8.97936e-10	0.371116	0.672	0.703	3.0115e-05	Mast	RBM39
DDIT41	1.30608e-09	0.480765	0.633	0.571	4.38034e-05	Mast	DDIT4
VMP1	1.45358e-09	0.385115	0.478	0.399	4.87501e-05	Mast	VMP1
CAMLG	1.89147e-09	0.517707	0.432	0.361	6.3436e-05	Mast	CAMLG
SEPT7	3.00109e-09	0.295128	0.81	0.791	0.00010065	Mast	SEPT7
MYO9B	3.93537e-09	0.332088	0.258	0.176	0.000131984	Mast	MYO9B
IER3	4.37243e-09	0.559469	0.507	0.41	0.000146643	Mast	IER3
G3BP21	5.50579e-09	0.441535	0.493	0.426	0.000184653	Mast	G3BP2
RBMX	6.72009e-09	0.464921	0.468	0.392	0.000225378	Mast	RBMX
VPS28	6.87216e-09	0.498662	0.625	0.613	0.000230478	Mast	VPS28
CDC42EP3	6.88087e-09	0.47876	0.387	0.305	0.000230771	Mast	CDC42EP3
CALM3	8.39319e-09	0.398395	0.527	0.455	0.000281491	Mast	CALM3
CMTM6	8.61955e-09	0.348078	0.441	0.358	0.000289083	Mast	CMTM6
SLC2A31	1.1616e-08	0.367876	0.543	0.466	0.000389578	Mast	SLC2A3
ANXA4	1.894e-08	0.433035	0.376	0.3	0.00063521	Mast	ANXA4
HNRNPU	2.09939e-08	0.321957	0.663	0.665	0.000704092	Mast	HNRNPU
CDKN2AIP	2.93269e-08	0.275503	0.263	0.182	0.000983566	Mast	CDKN2AIP
MLEC	3.31488e-08	0.456735	0.403	0.336	0.00111174	Mast	MLEC
PPP1CC	3.67803e-08	0.355445	0.369	0.294	0.00123354	Mast	PPP1CC
NR4A2	3.90491e-08	0.430564	0.505	0.419	0.00130963	Mast	NR4A2
SERPINB6	4.03194e-08	0.403356	0.459	0.39	0.00135223	Mast	SERPINB6
SRSF5	4.05457e-08	0.457283	0.615	0.596	0.00135982	Mast	SRSF5
ARID1B	4.07616e-08	0.262628	0.323	0.235	0.00136706	Mast	ARID1B
CUTA	5.26881e-08	0.453064	0.57	0.541	0.00176705	Mast	CUTA
BCL3	5.68862e-08	0.415407	0.267	0.191	0.00190785	Mast	BCL3
INTS61	7.01569e-08	0.3007	0.349	0.266	0.00235292	Mast	INTS6
DNAJC19	7.16996e-08	0.493431	0.375	0.301	0.00240466	Mast	DNAJC19
NFKB1	7.38728e-08	0.307404	0.265	0.189	0.00247754	Mast	NFKB1
SPCS1	8.06728e-08	0.442358	0.667	0.652	0.00270561	Mast	SPCS1
CREM1	1.00508e-07	0.487791	0.446	0.384	0.00337083	Mast	CREM
EIF1AX	1.07991e-07	0.486378	0.489	0.446	0.00362181	Mast	EIF1AX
PNPLA8	1.47669e-07	0.454211	0.358	0.287	0.00495254	Mast	PNPLA8
CDK4	1.61066e-07	0.367453	0.269	0.198	0.00540184	Mast	CDK4
DDIT31	1.8258e-07	0.418124	0.33	0.254	0.00612336	Mast	DDIT3
SPCS3	1.95103e-07	0.544179	0.478	0.44	0.00654336	Mast	SPCS3
PPP3CA	2.07991e-07	0.535064	0.371	0.296	0.0069756	Mast	PPP3CA
HSPH1	2.17021e-07	0.381453	0.33	0.255	0.00727846	Mast	HSPH1
CLINT1	2.33451e-07	0.452119	0.391	0.323	0.00782948	Mast	CLINT1
COMMD6	2.99057e-07	0.4407	0.783	0.766	0.0100298	Mast	COMMD6
TSPAN4	3.07946e-07	0.373074	0.341	0.262	0.0103279	Mast	TSPAN4
AKR1A1	3.13411e-07	0.465129	0.434	0.377	0.0105112	Mast	AKR1A1
MTDH	4.26019e-07	0.306632	0.638	0.629	0.0142878	Mast	MTDH
TMEM258	4.65472e-07	0.536983	0.591	0.554	0.015611	Mast	TMEM258
UQCRB	4.66949e-07	0.290174	0.785	0.808	0.0156605	Mast	UQCRB
EPB41L4A-AS1	5.04167e-07	0.29732	0.278	0.204	0.0169087	Mast	EPB41L4A-AS1
MID1IP1	5.24236e-07	0.361295	0.251	0.181	0.0175818	Mast	MID1IP1
HSD17B12	5.87015e-07	0.38475	0.317	0.25	0.0196873	Mast	HSD17B12
DDAH2	7.65912e-07	0.40405	0.473	0.407	0.0256871	Mast	DDAH2
DDX3Y	8.75819e-07	0.390513	0.333	0.268	0.0293732	Mast	DDX3Y
PDCD41	8.82494e-07	0.390391	0.462	0.397	0.0295971	Mast	PDCD4
BLOC1S6	1.10053e-06	0.364693	0.299	0.237	0.0369095	Mast	BLOC1S6
CCDC88A	1.12107e-06	0.353268	0.321	0.248	0.0375985	Mast	CCDC88A
TALDO1	1.20857e-06	0.285556	0.538	0.482	0.040533	Mast	TALDO1
SEC61G	1.23984e-06	0.549285	0.581	0.553	0.0415817	Mast	SEC61G
NUCB2	1.37774e-06	0.507444	0.457	0.414	0.0462067	Mast	NUCB2
SRSF6	1.44387e-06	0.457694	0.292	0.228	0.0484245	Mast	SRSF6
ZFAS1	1.7202e-06	0.367404	0.611	0.59	0.0576919	Mast	ZFAS1
RNF145	4.26504e-06	0.296815	0.258	0.192	0.143041	Mast	RNF145
ACBD3	5.22599e-06	0.330627	0.353	0.294	0.175269	Mast	ACBD3
RHOG	5.27552e-06	0.298962	0.452	0.389	0.17693	Mast	RHOG
ATG12	6.03882e-06	0.359522	0.323	0.264	0.20253	Mast	ATG12
PYCARD	6.36676e-06	0.353276	0.441	0.359	0.213528	Mast	PYCARD
AP3S1	8.3184e-06	0.364733	0.358	0.305	0.278982	Mast	AP3S1
SEC62	8.52601e-06	0.387466	0.726	0.7	0.285945	Mast	SEC62
DYNLL1	9.444e-06	0.283269	0.751	0.736	0.316733	Mast	DYNLL1
DDX51	9.9601e-06	0.399073	0.733	0.87	0.334042	Mast	DDX5
UQCRH	1.04502e-05	0.376469	0.69	0.687	0.350479	Mast	UQCRH
CD46	1.05517e-05	0.38347	0.453	0.403	0.353883	Mast	CD46
BACH1	1.26529e-05	0.389584	0.267	0.21	0.424355	Mast	BACH1
NDUFB2	1.81975e-05	0.353139	0.661	0.625	0.610308	Mast	NDUFB2
SPCS2	2.04258e-05	0.351846	0.634	0.644	0.68504	Mast	SPCS2
TMOD3	2.94694e-05	0.328318	0.434	0.39	0.988344	Mast	TMOD3
PHF20	2.96918e-05	0.315685	0.364	0.31	0.995804	Mast	PHF20
TSPYL1	4.76211e-05	0.522579	0.305	0.254	1	Mast	TSPYL1
CSRNP1	5.85527e-05	0.279446	0.346	0.285	1	Mast	CSRNP1
YWHAZ1	6.63777e-05	0.305906	0.681	0.721	1	Mast	YWHAZ
STAT3	6.78127e-05	0.367416	0.489	0.466	1	Mast	STAT3
NUDT1	6.99687e-05	0.353047	0.269	0.216	1	Mast	NUDT1
FLOT1	7.69148e-05	0.338108	0.389	0.342	1	Mast	FLOT1
SERINC3	8.58408e-05	0.355445	0.333	0.285	1	Mast	SERINC3
XBP1	8.8918e-05	0.361491	0.446	0.417	1	Mast	XBP1
IDS1	0.000105456	0.31308	0.432	0.391	1	Mast	IDS
RPS4Y11	0.000107539	0.266746	0.699	0.734	1	Mast	RPS4Y1
H2AFV1	0.00012256	0.336298	0.518	0.487	1	Mast	H2AFV
GMFG1	0.000147559	0.25595	0.616	0.54	1	Mast	GMFG
PRKAR1A	0.000197531	0.36925	0.353	0.315	1	Mast	PRKAR1A
HMGN11	0.000206803	0.293077	0.597	0.6	1	Mast	HMGN1
PDIA6	0.000207353	0.373883	0.522	0.517	1	Mast	PDIA6
DDX211	0.000234304	0.345072	0.593	0.579	1	Mast	DDX21
RRBP1	0.000253184	0.280228	0.437	0.396	1	Mast	RRBP1
RTN3	0.000321829	0.289767	0.369	0.332	1	Mast	RTN3
ANXA7	0.000334458	0.272747	0.418	0.385	1	Mast	ANXA7
IDH3G	0.00037749	0.362305	0.332	0.296	1	Mast	IDH3G
CIRBP	0.000391677	0.260705	0.642	0.704	1	Mast	CIRBP
EIF2S3	0.000394224	0.289577	0.376	0.338	1	Mast	EIF2S3
SPART	0.000571569	0.287762	0.258	0.214	1	Mast	SPART
ATP6V0E1	0.000645974	0.34375	0.715	0.714	1	Mast	ATP6V0E1
SNAP23	0.000696522	0.270212	0.281	0.24	1	Mast	SNAP23
PJA2	0.000710129	0.254471	0.448	0.418	1	Mast	PJA2
MCL11	0.000777192	0.274359	0.604	0.626	1	Mast	MCL1
HSPE11	0.000836316	0.427936	0.602	0.604	1	Mast	HSPE1
SELENOS	0.000961583	0.374295	0.477	0.46	1	Mast	SELENOS
TMED2	0.000994506	0.338005	0.384	0.36	1	Mast	TMED2
EIF4B	0.00106889	0.272117	0.507	0.513	1	Mast	EIF4B
NDUFAF3	0.00109872	0.425029	0.457	0.444	1	Mast	NDUFAF3
DNAJB6	0.00117911	0.268694	0.504	0.495	1	Mast	DNAJB6
IER2	0.00123106	0.313546	0.729	0.749	1	Mast	IER2
DNAJC1	0.00127152	0.250328	0.384	0.351	1	Mast	DNAJC1
HDLBP	0.00134339	0.281889	0.33	0.296	1	Mast	HDLBP
AP2M1	0.0015242	0.346051	0.455	0.444	1	Mast	AP2M1
VAPA	0.00176973	0.299841	0.563	0.575	1	Mast	VAPA
GTF2B1	0.00180846	0.304231	0.428	0.395	1	Mast	GTF2B
BNIP2	0.00193849	0.260016	0.362	0.328	1	Mast	BNIP2
HNRNPA3	0.00202329	0.253448	0.582	0.621	1	Mast	HNRNPA3
HSPA9	0.00288182	0.254271	0.373	0.345	1	Mast	HSPA9
SVIP1	0.00301614	0.326011	0.319	0.275	1	Mast	SVIP
CSDE1	0.00340227	0.270508	0.489	0.495	1	Mast	CSDE1
CFAP36	0.00344374	0.273027	0.271	0.231	1	Mast	CFAP36
SYPL1	0.00351401	0.273229	0.398	0.37	1	Mast	SYPL1
ATP5F1C	0.00371476	0.332294	0.539	0.534	1	Mast	ATP5F1C
SUB11	0.00397281	0.290684	0.701	0.728	1	Mast	SUB1
MRPL52	0.00424329	0.392176	0.394	0.38	1	Mast	MRPL52
MRPL33	0.00488074	0.449838	0.403	0.39	1	Mast	MRPL33
RTF2	0.00534057	0.281319	0.391	0.375	1	Mast	RTF2
CSNK1A1	0.00541441	0.25595	0.53	0.541	1	Mast	CSNK1A1
ETF1	0.0056167	0.269444	0.287	0.256	1	Mast	ETF1
YWHAE	0.00563381	0.307526	0.536	0.516	1	Mast	YWHAE
HIST1H4C1	0.00637361	0.302237	0.369	0.462	1	Mast	HIST1H4C
PEPD	0.00677229	0.299192	0.314	0.287	1	Mast	PEPD
GPBP11	0.00758058	0.288415	0.491	0.487	1	Mast	GPBP1
CMTM2	0	3.20054	0.269	0.003	0	Monocyte	CMTM2
S100A8	1.86021e-132	5.69184	0.502	0.106	6.23876e-128	Monocyte	S100A8
NEAT11	9.24539e-118	3.43087	0.907	0.755	3.10072e-113	Monocyte	NEAT1
CSF3R	1.78755e-115	3.19148	0.389	0.071	5.99508e-111	Monocyte	CSF3R
S100A9	4.84258e-94	4.00053	0.542	0.167	1.6241e-89	Monocyte	S100A9
CXCL8	2.77869e-93	3.45757	0.522	0.15	9.31915e-89	Monocyte	CXCL8
NAMPT	3.84572e-93	3.42635	0.757	0.434	1.28978e-88	Monocyte	NAMPT
SAT1	1.54142e-81	2.2449	0.87	0.677	5.16961e-77	Monocyte	SAT1
G0S2	1.37983e-78	3.16468	0.395	0.098	4.62769e-74	Monocyte	G0S2
FTH11	2.42834e-65	1.82614	0.993	0.977	8.14417e-61	Monocyte	FTH1
SLC11A1	1.96938e-54	2.53723	0.365	0.115	6.6049e-50	Monocyte	SLC11A1
MNDA	2.46195e-52	3.41591	0.458	0.187	8.2569e-48	Monocyte	MNDA
FTL	7.41917e-52	1.1785	0.96	0.968	2.48824e-47	Monocyte	FTL
TYROBP	1.57554e-48	1.48565	0.645	0.294	5.28404e-44	Monocyte	TYROBP
RGS21	4.14981e-40	2.8254	0.535	0.319	1.39176e-35	Monocyte	RGS2
FPR1	3.45288e-37	2.56996	0.319	0.117	1.15803e-32	Monocyte	FPR1
BCL2A1	8.78772e-36	2.59679	0.439	0.219	2.94723e-31	Monocyte	BCL2A1
MXD1	2.11498e-33	2.55305	0.332	0.136	7.09321e-29	Monocyte	MXD1
C5AR1	3.61658e-33	1.94822	0.402	0.186	1.21293e-28	Monocyte	C5AR1
AIF1	1.84343e-27	1.43815	0.485	0.245	6.1825e-23	Monocyte	AIF1
LST1	1.87249e-27	2.72886	0.379	0.198	6.27994e-23	Monocyte	LST1
SRGN2	5.73263e-27	1.41461	0.781	0.775	1.92261e-22	Monocyte	SRGN
ACSL1	8.10171e-27	2.17121	0.266	0.103	2.71715e-22	Monocyte	ACSL1
PSMB91	1.03184e-26	0.355762	0.136	0.543	3.46058e-22	Monocyte	PSMB9
S100A11	9.00831e-24	1.58397	0.731	0.811	3.02121e-19	Monocyte	S100A11
SRSF51	1.74704e-23	0.313917	0.179	0.598	5.85924e-19	Monocyte	SRSF5
TAX1BP1	6.53881e-23	0.38205	0.166	0.566	2.19299e-18	Monocyte	TAX1BP1
IFI16	9.28389e-23	0.301967	0.169	0.572	3.11363e-18	Monocyte	IFI16
TAF10	2.49519e-22	0.398956	0.116	0.466	8.36837e-18	Monocyte	TAF10
UBL5	3.03538e-22	0.300631	0.233	0.692	1.01801e-17	Monocyte	UBL5
BASP1	4.06435e-22	2.70266	0.382	0.227	1.3631e-17	Monocyte	BASP1
SOD2	7.46137e-22	2.38051	0.498	0.392	2.50239e-17	Monocyte	SOD2
H3F3A	1.10256e-21	1.86483	0.744	0.906	3.69777e-17	Monocyte	H3F3A
PTPRE	2.84436e-21	2.22105	0.425	0.285	9.53942e-17	Monocyte	PTPRE
CHMP2A	3.11187e-21	0.281582	0.13	0.481	1.04366e-16	Monocyte	CHMP2A
PCBP1	7.26951e-21	0.273732	0.216	0.652	2.43805e-16	Monocyte	PCBP1
DYNLT1	7.66628e-21	0.285293	0.12	0.455	2.57112e-16	Monocyte	DYNLT1
RAP1A	1.09584e-20	0.251628	0.116	0.45	3.67523e-16	Monocyte	RAP1A
UQCR11	1.26175e-20	0.38845	0.206	0.629	4.23167e-16	Monocyte	UQCR11
AHNAK	2.85708e-20	0.370899	0.183	0.571	9.58207e-16	Monocyte	AHNAK
ARPC4	1.28772e-19	0.288654	0.126	0.459	4.31877e-15	Monocyte	ARPC4
ATP5MPL	1.30857e-19	0.256801	0.153	0.508	4.3887e-15	Monocyte	ATP5MPL
PGK1	7.56394e-19	0.426219	0.223	0.631	2.53679e-14	Monocyte	PGK1
ITGAX	7.67776e-19	2.08099	0.259	0.121	2.57497e-14	Monocyte	ITGAX
FKBP8	1.34281e-18	0.474749	0.13	0.453	4.50353e-14	Monocyte	FKBP8
RBM251	2.24577e-18	0.28498	0.203	0.584	7.53185e-14	Monocyte	RBM25
C4orf3	3.52858e-18	0.391402	0.206	0.598	1.18341e-13	Monocyte	C4orf3
TPR	2.54923e-17	0.270742	0.166	0.506	8.54961e-13	Monocyte	TPR
FLOT11	3.7367e-17	0.349712	0.08	0.344	1.25322e-12	Monocyte	FLOT1
HSD17B11	4.37577e-17	0.320281	0.076	0.336	1.46755e-12	Monocyte	HSD17B11
SEC621	4.47393e-17	0.320915	0.269	0.703	1.50047e-12	Monocyte	SEC62
HSBP1	4.83001e-17	0.484489	0.123	0.422	1.61989e-12	Monocyte	HSBP1
RTF1	5.17139e-17	0.25563	0.116	0.409	1.73438e-12	Monocyte	RTF1
PAPOLA	7.2644e-17	0.254104	0.116	0.409	2.43633e-12	Monocyte	PAPOLA
TUBA1A	1.14297e-16	0.361151	0.246	0.644	3.83328e-12	Monocyte	TUBA1A
RRBP11	1.5806e-16	0.333687	0.113	0.399	5.30101e-12	Monocyte	RRBP1
DNAJB61	1.87975e-16	0.356306	0.166	0.498	6.30431e-12	Monocyte	DNAJB6
SERINC1	2.55161e-16	0.26272	0.086	0.346	8.5576e-12	Monocyte	SERINC1
SERP11	3.2875e-16	0.349652	0.249	0.651	1.10256e-11	Monocyte	SERP1
KMT2E1	4.06079e-16	0.355535	0.206	0.57	1.36191e-11	Monocyte	KMT2E
CALM31	4.79549e-16	0.291605	0.15	0.458	1.60831e-11	Monocyte	CALM3
ACTN4	6.50007e-16	0.283791	0.116	0.397	2.17999e-11	Monocyte	ACTN4
TSPO	8.17727e-16	0.263861	0.266	0.671	2.74249e-11	Monocyte	TSPO
ZBTB7A	1.20314e-15	0.255191	0.09	0.345	4.03508e-11	Monocyte	ZBTB7A
TLN1	1.30112e-15	0.325548	0.223	0.591	4.36369e-11	Monocyte	TLN1
BZW1	1.44089e-15	0.273253	0.226	0.608	4.83247e-11	Monocyte	BZW1
ARID4B1	1.7276e-15	0.301312	0.156	0.463	5.79401e-11	Monocyte	ARID4B
AKAP9	1.96992e-15	0.346303	0.14	0.435	6.60672e-11	Monocyte	AKAP9
TXNDC17	2.15681e-15	0.341846	0.11	0.379	7.23351e-11	Monocyte	TXNDC17
ANKRD121	3.44827e-15	0.348229	0.243	0.623	1.15648e-10	Monocyte	ANKRD12
PLAUR1	3.58953e-15	1.54325	0.402	0.275	1.20386e-10	Monocyte	PLAUR
RTF21	4.31122e-15	0.438067	0.11	0.376	1.4459e-10	Monocyte	RTF2
CCNH1	5.29147e-15	0.293396	0.093	0.344	1.77465e-10	Monocyte	CCNH
ACTR3	5.29436e-15	0.474665	0.193	0.536	1.77562e-10	Monocyte	ACTR3
DDX17	5.45305e-15	0.539322	0.196	0.54	1.82884e-10	Monocyte	DDX17
BLOC1S1	6.79416e-15	0.429475	0.176	0.496	2.27863e-10	Monocyte	BLOC1S1
DNAJC31	7.32935e-15	0.320026	0.106	0.368	2.45812e-10	Monocyte	DNAJC3
SP1101	8.68827e-15	0.359705	0.106	0.368	2.91387e-10	Monocyte	SP110
TGOLN2	1.11146e-14	0.497226	0.15	0.448	3.72761e-10	Monocyte	TGOLN2
SLC25A37	1.14669e-14	2.57214	0.362	0.254	3.84576e-10	Monocyte	SLC25A37
MSRB2	1.23526e-14	0.267288	0.047	0.255	4.14283e-10	Monocyte	MSRB2
SMCHD11	1.59422e-14	2.46148	0.452	0.394	5.3467e-10	Monocyte	SMCHD1
GNG5	2.07283e-14	0.30726	0.259	0.657	6.95187e-10	Monocyte	GNG5
CCPG1	2.13717e-14	0.517348	0.12	0.388	7.16764e-10	Monocyte	CCPG1
TRA2B1	2.15475e-14	0.404825	0.159	0.458	7.22659e-10	Monocyte	TRA2B
BCLAF1	2.29365e-14	0.311105	0.133	0.408	7.69243e-10	Monocyte	BCLAF1
VCP	2.4061e-14	0.290707	0.09	0.332	8.06959e-10	Monocyte	VCP
LUC7L3	2.43853e-14	0.270188	0.123	0.391	8.17835e-10	Monocyte	LUC7L3
PCM1	3.81347e-14	0.299921	0.13	0.4	1.27896e-09	Monocyte	PCM1
ELF12	5.53787e-14	0.334147	0.216	0.558	1.85729e-09	Monocyte	ELF1
NAPA	6.72186e-14	0.255182	0.06	0.271	2.25438e-09	Monocyte	NAPA
PNISR	7.12664e-14	0.295885	0.186	0.502	2.39013e-09	Monocyte	PNISR
MYADM1	7.32879e-14	0.421383	0.173	0.477	2.45793e-09	Monocyte	MYADM
ATP1B3	7.91296e-14	0.401257	0.14	0.411	2.65385e-09	Monocyte	ATP1B3
VAPA1	8.66573e-14	0.434181	0.223	0.577	2.90631e-09	Monocyte	VAPA
TMEM165	9.37272e-14	0.388967	0.12	0.379	3.14342e-09	Monocyte	TMEM165
RHOG1	1.05226e-13	0.511212	0.126	0.392	3.52908e-09	Monocyte	RHOG
BPTF	1.46487e-13	0.463514	0.133	0.402	4.91288e-09	Monocyte	BPTF
GNB2	1.55168e-13	0.663831	0.169	0.472	5.20403e-09	Monocyte	GNB2
HEBP2	1.59995e-13	0.547714	0.156	0.445	5.3659e-09	Monocyte	HEBP2
EIF4A1	1.66537e-13	0.571861	0.159	0.454	5.58532e-09	Monocyte	EIF4A1
PAIP2	1.69016e-13	0.659351	0.186	0.502	5.66847e-09	Monocyte	PAIP2
TNRC6B	2.0345e-13	0.524618	0.12	0.375	6.82331e-09	Monocyte	TNRC6B
CSNK1A11	2.0736e-13	0.442593	0.206	0.543	6.95442e-09	Monocyte	CSNK1A1
UBALD21	2.32747e-13	0.522677	0.166	0.461	7.80586e-09	Monocyte	UBALD2
MOB1A	3.38027e-13	0.413862	0.14	0.41	1.13367e-08	Monocyte	MOB1A
KLF3	4.04637e-13	0.348463	0.12	0.37	1.35707e-08	Monocyte	KLF3
EIF3J	4.43501e-13	0.359716	0.113	0.358	1.48741e-08	Monocyte	EIF3J
EIF3A	4.51331e-13	0.364841	0.14	0.406	1.51368e-08	Monocyte	EIF3A
TMEM167A	4.71181e-13	0.384267	0.093	0.322	1.58025e-08	Monocyte	TMEM167A
PRPF38B1	5.10298e-13	0.31447	0.15	0.423	1.71144e-08	Monocyte	PRPF38B
KRAS	5.17761e-13	0.301225	0.11	0.35	1.73647e-08	Monocyte	KRAS
CAPZA2	6.82685e-13	0.572289	0.163	0.452	2.28959e-08	Monocyte	CAPZA2
WDR1	7.3326e-13	0.292672	0.083	0.301	2.45921e-08	Monocyte	WDR1
CIR1	8.88523e-13	0.536863	0.12	0.365	2.97993e-08	Monocyte	CIR1
HM13	9.89186e-13	0.401181	0.123	0.372	3.31753e-08	Monocyte	HM13
IKBIP	1.0335e-12	0.374003	0.063	0.263	3.46615e-08	Monocyte	IKBIP
MACF1	1.10697e-12	0.324552	0.126	0.375	3.71257e-08	Monocyte	MACF1
CASP4	1.19956e-12	0.440099	0.126	0.378	4.02308e-08	Monocyte	CASP4
DYNC1LI1	1.45605e-12	0.345709	0.07	0.274	4.8833e-08	Monocyte	DYNC1LI1
TMA7	1.94715e-12	0.277846	0.355	0.81	6.53036e-08	Monocyte	TMA7
ZMAT2	2.50718e-12	0.521427	0.07	0.271	8.40858e-08	Monocyte	ZMAT2
TMF1	2.58607e-12	0.254339	0.103	0.33	8.67317e-08	Monocyte	TMF1
RAB8B	2.72298e-12	0.263555	0.096	0.317	9.13235e-08	Monocyte	RAB8B
TXN1	3.20675e-12	0.514516	0.272	0.66	1.07548e-07	Monocyte	TXN
CNPY3	3.28408e-12	0.323761	0.09	0.305	1.10141e-07	Monocyte	CNPY3
PPP4R2	3.89388e-12	0.256248	0.076	0.279	1.30593e-07	Monocyte	PPP4R2
EIF4G2	4.2026e-12	0.534062	0.213	0.536	1.40947e-07	Monocyte	EIF4G2
STK41	4.87428e-12	0.392189	0.203	0.502	1.63474e-07	Monocyte	STK4
CHMP4B	4.88477e-12	0.279936	0.063	0.255	1.63825e-07	Monocyte	CHMP4B
BIRC32	5.01112e-12	0.376907	0.1	0.316	1.68063e-07	Monocyte	BIRC3
TSEN34	6.42535e-12	0.28853	0.063	0.254	2.15493e-07	Monocyte	TSEN34
PNPLA81	6.80405e-12	0.422529	0.083	0.289	2.28194e-07	Monocyte	PNPLA8
RSBN1L	6.80431e-12	0.509144	0.136	0.383	2.28203e-07	Monocyte	RSBN1L
YPEL51	7.07591e-12	0.556116	0.193	0.492	2.37312e-07	Monocyte	YPEL5
RTN4	7.71375e-12	0.481927	0.216	0.533	2.58704e-07	Monocyte	RTN4
DDX212	7.76353e-12	0.483228	0.243	0.581	2.60373e-07	Monocyte	DDX21
ASPH	8.20507e-12	0.394213	0.083	0.288	2.75182e-07	Monocyte	ASPH
POMP	8.34238e-12	0.56268	0.246	0.597	2.79787e-07	Monocyte	POMP
TWF2	1.03497e-11	0.361058	0.106	0.329	3.47109e-07	Monocyte	TWF2
CREM2	1.46162e-11	0.273832	0.143	0.387	4.90197e-07	Monocyte	CREM
PJA21	1.48977e-11	0.546612	0.156	0.42	4.99637e-07	Monocyte	PJA2
ATP1A1	1.51926e-11	0.483692	0.123	0.356	5.0953e-07	Monocyte	ATP1A1
FNBP11	1.66114e-11	0.270965	0.1	0.312	5.57113e-07	Monocyte	FNBP1
JPT11	2.12361e-11	0.574048	0.136	0.381	7.12216e-07	Monocyte	JPT1
HNRNPH12	2.15499e-11	0.343625	0.243	0.57	7.22741e-07	Monocyte	HNRNPH1
VPS4B	3.04864e-11	0.430666	0.093	0.299	1.02245e-06	Monocyte	VPS4B
WNK1	3.1619e-11	0.269486	0.083	0.28	1.06044e-06	Monocyte	WNK1
PRPF4B	3.65137e-11	0.345328	0.183	0.458	1.2246e-06	Monocyte	PRPF4B
ITSN2	3.85988e-11	0.279137	0.076	0.268	1.29453e-06	Monocyte	ITSN2
DBNL	3.91096e-11	0.468569	0.076	0.268	1.31166e-06	Monocyte	DBNL
ASH1L	4.16497e-11	0.251298	0.09	0.29	1.39685e-06	Monocyte	ASH1L
GPBP12	4.34443e-11	0.522987	0.196	0.489	1.45703e-06	Monocyte	GPBP1
NCF1	4.45028e-11	2.41771	0.296	0.199	1.49254e-06	Monocyte	NCF1
CDKN2D1	4.92047e-11	0.454195	0.103	0.309	1.65023e-06	Monocyte	CDKN2D
RIOK3	4.98705e-11	0.30361	0.083	0.278	1.67256e-06	Monocyte	RIOK3
HBP1	5.28105e-11	0.312926	0.076	0.266	1.77116e-06	Monocyte	HBP1
PPT1	6.0277e-11	0.377949	0.086	0.284	2.02157e-06	Monocyte	PPT1
SLU7	6.52864e-11	0.355584	0.07	0.253	2.18958e-06	Monocyte	SLU7
NEMF	7.1916e-11	0.251154	0.073	0.257	2.41192e-06	Monocyte	NEMF
RAB1A	7.19304e-11	0.489544	0.103	0.313	2.4124e-06	Monocyte	RAB1A
SH3GLB1	8.69118e-11	0.731179	0.179	0.454	2.91485e-06	Monocyte	SH3GLB1
YTHDC1	8.86617e-11	0.383407	0.12	0.341	2.97354e-06	Monocyte	YTHDC1
BNIP21	9.0777e-11	0.605141	0.113	0.33	3.04448e-06	Monocyte	BNIP2
SPP1	9.3122e-11	0.908495	0.306	0.18	3.12313e-06	Monocyte	SPP1
SQSTM11	1.00297e-10	0.499503	0.282	0.649	3.36377e-06	Monocyte	SQSTM1
CPQ	1.01358e-10	0.345369	0.08	0.267	3.39934e-06	Monocyte	CPQ
SENP6	1.10004e-10	0.360204	0.083	0.274	3.6893e-06	Monocyte	SENP6
CARD16	1.16823e-10	0.530429	0.103	0.31	3.91802e-06	Monocyte	CARD16
GRN	1.28515e-10	0.26626	0.15	0.386	4.31015e-06	Monocyte	GRN
NABP11	1.34066e-10	2.13366	0.309	0.219	4.49631e-06	Monocyte	NABP1
IFNAR1	1.63625e-10	0.542101	0.096	0.296	5.48767e-06	Monocyte	IFNAR1
GK	1.69572e-10	1.84857	0.252	0.154	5.68711e-06	Monocyte	GK
CCDC82	1.80645e-10	0.257983	0.08	0.263	6.05848e-06	Monocyte	CCDC82
RNF114	1.90239e-10	0.301415	0.073	0.253	6.38023e-06	Monocyte	RNF114
CD531	2.06835e-10	0.325602	0.176	0.434	6.93683e-06	Monocyte	CD53
GBP2	2.54451e-10	0.505148	0.103	0.305	8.53378e-06	Monocyte	GBP2
ZYX	2.61984e-10	0.583972	0.106	0.311	8.78643e-06	Monocyte	ZYX
CLK11	2.62813e-10	0.304314	0.116	0.326	8.81423e-06	Monocyte	CLK1
GTF2I	2.64866e-10	0.49484	0.086	0.275	8.88307e-06	Monocyte	GTF2I
FAM107B1	2.71607e-10	0.378548	0.193	0.461	9.10916e-06	Monocyte	FAM107B
BLOC1S2	2.91847e-10	0.436644	0.073	0.251	9.78795e-06	Monocyte	BLOC1S2
RBBP6	2.98182e-10	0.279696	0.076	0.256	1.00004e-05	Monocyte	RBBP6
WAC	3.47495e-10	0.476008	0.1	0.296	1.16543e-05	Monocyte	WAC
PABPC41	3.87161e-10	0.303021	0.083	0.265	1.29846e-05	Monocyte	PABPC4
RBM392	3.92137e-10	0.457017	0.312	0.705	1.31515e-05	Monocyte	RBM39
UBE2R2	4.04563e-10	0.595915	0.113	0.321	1.35682e-05	Monocyte	UBE2R2
CCNDBP1	4.04828e-10	0.421981	0.106	0.308	1.35771e-05	Monocyte	CCNDBP1
DDX3X1	4.65596e-10	0.493011	0.243	0.557	1.56152e-05	Monocyte	DDX3X
ZNF106	4.90551e-10	0.448909	0.103	0.3	1.64521e-05	Monocyte	ZNF106
TMX4	4.9476e-10	0.594194	0.096	0.289	1.65933e-05	Monocyte	TMX4
GNB1	5.22785e-10	0.618196	0.12	0.331	1.75332e-05	Monocyte	GNB1
GLUL1	5.48611e-10	1.76219	0.435	0.403	1.83993e-05	Monocyte	GLUL
BRD21	5.9544e-10	0.589823	0.169	0.417	1.99699e-05	Monocyte	BRD2
YWHAZ2	5.96608e-10	0.385523	0.326	0.723	2.0009e-05	Monocyte	YWHAZ
MYH9	6.34231e-10	0.666947	0.183	0.444	2.12708e-05	Monocyte	MYH9
LRP10	6.71462e-10	0.645039	0.1	0.293	2.25195e-05	Monocyte	LRP10
CKLF2	7.3295e-10	0.622225	0.183	0.441	2.45817e-05	Monocyte	CKLF
MMP24OS	9.77765e-10	0.645622	0.126	0.339	3.27923e-05	Monocyte	MMP24OS
GOLGB1	1.00516e-09	0.71151	0.169	0.416	3.37112e-05	Monocyte	GOLGB1
SON	1.36358e-09	0.453208	0.355	0.783	4.57319e-05	Monocyte	SON
PLSCR1	1.51284e-09	0.397317	0.146	0.369	5.07378e-05	Monocyte	PLSCR1
DAZAP2	1.71688e-09	0.777053	0.176	0.429	5.75808e-05	Monocyte	DAZAP2
CAPZA1	1.75649e-09	0.569975	0.179	0.433	5.8909e-05	Monocyte	CAPZA1
LIMD21	2.28601e-09	0.393977	0.146	0.364	7.66683e-05	Monocyte	LIMD2
PAK2	2.81702e-09	0.843175	0.223	0.521	9.44772e-05	Monocyte	PAK2
EWSR1	2.93412e-09	0.406744	0.1	0.284	9.84044e-05	Monocyte	EWSR1
CNOT2	3.13401e-09	0.333034	0.083	0.254	0.000105109	Monocyte	CNOT2
SAMHD1	3.52457e-09	0.57695	0.14	0.352	0.000118207	Monocyte	SAMHD1
PPP1R18	3.54452e-09	0.679355	0.123	0.325	0.000118876	Monocyte	PPP1R18
CTSS	3.61588e-09	1.77777	0.445	0.413	0.000121269	Monocyte	CTSS
PRRC2C1	3.67797e-09	0.737695	0.289	0.647	0.000123352	Monocyte	PRRC2C
NFKBIZ1	4.66941e-09	0.424663	0.093	0.268	0.000156603	Monocyte	NFKBIZ
SF11	4.85718e-09	0.540201	0.243	0.546	0.0001629	Monocyte	SF1
ZC3HAV11	5.30446e-09	0.334081	0.1	0.277	0.000177901	Monocyte	ZC3HAV1
IDI12	7.16483e-09	0.368291	0.103	0.282	0.000240294	Monocyte	IDI1
ARID4A	8.3622e-09	0.640023	0.103	0.284	0.000280452	Monocyte	ARID4A
RAP2B	8.48696e-09	0.331424	0.086	0.253	0.000284636	Monocyte	RAP2B
PRR13	8.65256e-09	0.959511	0.213	0.49	0.000290189	Monocyte	PRR13
CYSTM1	9.57173e-09	0.759311	0.136	0.343	0.000321017	Monocyte	CYSTM1
SLC38A2	9.66255e-09	0.581491	0.199	0.455	0.000324063	Monocyte	SLC38A2
TKT	1.119e-08	0.636124	0.183	0.427	0.00037529	Monocyte	TKT
ARHGAP181	1.14424e-08	0.374478	0.116	0.303	0.000383756	Monocyte	ARHGAP18
PRKAR1A1	1.22669e-08	0.513329	0.123	0.317	0.000411407	Monocyte	PRKAR1A
SMARCA2	1.29655e-08	0.468344	0.086	0.252	0.000434838	Monocyte	SMARCA2
HOOK3	1.30653e-08	0.537479	0.09	0.258	0.000438183	Monocyte	HOOK3
SERPINB11	1.3212e-08	0.568741	0.213	0.48	0.000443105	Monocyte	SERPINB1
UPF2	1.50519e-08	0.512573	0.126	0.32	0.000504811	Monocyte	UPF2
RNF149	1.53987e-08	2.26265	0.362	0.317	0.00051644	Monocyte	RNF149
IDS2	1.63487e-08	0.708385	0.166	0.393	0.000548302	Monocyte	IDS
STAT31	1.68806e-08	0.607048	0.206	0.468	0.000566141	Monocyte	STAT3
BRD4	1.75295e-08	0.651221	0.12	0.309	0.000587904	Monocyte	BRD4
RTN31	1.82654e-08	0.731293	0.133	0.334	0.000612585	Monocyte	RTN3
OSBPL81	1.90436e-08	0.853624	0.15	0.364	0.000638684	Monocyte	OSBPL8
APBB1IP1	2.14958e-08	0.342034	0.153	0.359	0.000720928	Monocyte	APBB1IP
PHACTR1	2.47022e-08	1.92206	0.259	0.179	0.000828463	Monocyte	PHACTR1
GABARAPL1	2.48178e-08	0.422437	0.11	0.286	0.00083234	Monocyte	GABARAPL1
AGTRAP1	2.66502e-08	0.615791	0.09	0.254	0.000893794	Monocyte	AGTRAP
GNAI3	2.90663e-08	0.816191	0.143	0.349	0.000974827	Monocyte	GNAI3
TCF25	3.13796e-08	0.812805	0.239	0.533	0.00105241	Monocyte	TCF25
STAG2	3.14427e-08	0.602334	0.12	0.305	0.00105452	Monocyte	STAG2
INTS62	3.35508e-08	0.416156	0.1	0.267	0.00112523	Monocyte	INTS6
ANKRD11	3.44769e-08	0.575339	0.163	0.379	0.00115628	Monocyte	ANKRD11
LITAF	3.48387e-08	2.09996	0.455	0.481	0.00116842	Monocyte	LITAF
NUFIP2	3.49691e-08	0.610453	0.136	0.332	0.00117279	Monocyte	NUFIP2
AKIRIN11	3.63272e-08	0.570922	0.113	0.291	0.00121834	Monocyte	AKIRIN1
TYMP	3.81046e-08	1.40621	0.419	0.392	0.00127795	Monocyte	TYMP
ELF2	3.87724e-08	0.642623	0.12	0.304	0.00130035	Monocyte	ELF2
UBE2B	4.24183e-08	0.799332	0.266	0.591	0.00142263	Monocyte	UBE2B
NRBF2	4.31881e-08	0.631978	0.113	0.291	0.00144844	Monocyte	NRBF2
IFNGR1	5.16643e-08	0.530056	0.206	0.455	0.00173272	Monocyte	IFNGR1
SKIL1	5.17644e-08	0.617229	0.146	0.348	0.00173607	Monocyte	SKIL
TOP1	5.59238e-08	0.645326	0.196	0.438	0.00187557	Monocyte	TOP1
PLEKHO1	5.95062e-08	0.643052	0.12	0.3	0.00199572	Monocyte	PLEKHO1
RNF13	6.545e-08	0.934765	0.15	0.355	0.00219506	Monocyte	RNF13
MAP1LC3B	7.3174e-08	0.793409	0.272	0.589	0.00245411	Monocyte	MAP1LC3B
CDV3	8.16197e-08	0.657057	0.239	0.526	0.00273736	Monocyte	CDV3
TANK1	9.18971e-08	0.530782	0.12	0.296	0.00308204	Monocyte	TANK
BNIP3L	9.48268e-08	0.686465	0.196	0.436	0.0031803	Monocyte	BNIP3L
SRA1	1.00434e-07	0.618327	0.113	0.285	0.00336837	Monocyte	SRA1
RAB21	1.07468e-07	0.609206	0.113	0.286	0.00360425	Monocyte	RAB21
UBE2D3	1.12822e-07	0.720158	0.292	0.636	0.00378383	Monocyte	UBE2D3
KANSL1	1.1396e-07	0.41974	0.11	0.277	0.00382199	Monocyte	KANSL1
GRB2	1.30505e-07	0.789434	0.216	0.476	0.00437689	Monocyte	GRB2
FRMD4B	1.4185e-07	0.458224	0.11	0.275	0.00475736	Monocyte	FRMD4B
SERINC31	1.55161e-07	0.645895	0.116	0.287	0.00520378	Monocyte	SERINC3
NAGK	1.57884e-07	0.592231	0.116	0.288	0.00529513	Monocyte	NAGK
CNN21	1.68691e-07	0.633391	0.113	0.282	0.00565757	Monocyte	CNN2
CTNNB1	1.80408e-07	0.669872	0.15	0.347	0.00605054	Monocyte	CTNNB1
FNBP41	1.92697e-07	0.414959	0.123	0.295	0.00646266	Monocyte	FNBP4
DDIT32	2.1859e-07	0.475693	0.1	0.256	0.00733106	Monocyte	DDIT3
PARP14	2.21311e-07	0.706299	0.116	0.284	0.00742233	Monocyte	PARP14
FAM133B	2.2632e-07	0.610926	0.213	0.455	0.00759032	Monocyte	FAM133B
LY96	2.27733e-07	0.763662	0.1	0.257	0.00763771	Monocyte	LY96
ACTN1	2.29129e-07	0.641129	0.12	0.291	0.00768452	Monocyte	ACTN1
FOSB1	2.62691e-07	0.622503	0.272	0.563	0.00881013	Monocyte	FOSB
CLTC	3.15598e-07	0.703755	0.1	0.254	0.0105845	Monocyte	CLTC
RHOQ	3.46035e-07	0.581786	0.1	0.254	0.0116053	Monocyte	RHOQ
PPP3CA1	3.93365e-07	0.552478	0.126	0.298	0.0131927	Monocyte	PPP3CA
FUS1	4.44111e-07	0.533091	0.322	0.668	0.0148946	Monocyte	FUS
ETS2	4.51525e-07	0.526808	0.159	0.351	0.0151432	Monocyte	ETS2
AFF4	4.62651e-07	0.716154	0.11	0.268	0.0155164	Monocyte	AFF4
MIS18BP1	5.56762e-07	0.53739	0.106	0.261	0.0186727	Monocyte	MIS18BP1
TMED5	5.62214e-07	0.345297	0.1	0.25	0.0188555	Monocyte	TMED5
ERICH1	6.29225e-07	0.441381	0.126	0.293	0.0211029	Monocyte	ERICH1
FKBP51	6.45419e-07	0.6691	0.13	0.3	0.0216461	Monocyte	FKBP5
PTEN	6.72497e-07	0.881867	0.13	0.303	0.0225542	Monocyte	PTEN
CD461	7.45524e-07	0.947185	0.186	0.405	0.0250034	Monocyte	CD46
BOD1L1	8.07284e-07	1.07817	0.219	0.467	0.0270747	Monocyte	BOD1L1
ZFAND5	8.5105e-07	0.769267	0.206	0.437	0.0285425	Monocyte	ZFAND5
SPI1	8.80135e-07	1.69366	0.262	0.197	0.029518	Monocyte	SPI1
RALBP1	1.1234e-06	1.01463	0.173	0.378	0.0376766	Monocyte	RALBP1
UBE2D1	1.16867e-06	0.895193	0.106	0.258	0.039195	Monocyte	UBE2D1
TAGLN2	1.24859e-06	0.426225	0.405	0.786	0.0418751	Monocyte	TAGLN2
H2AFY	1.38099e-06	0.629023	0.193	0.405	0.0463157	Monocyte	H2AFY
PLEK	1.41849e-06	1.66553	0.326	0.264	0.0475733	Monocyte	PLEK
CREBRF	1.88059e-06	0.65145	0.13	0.292	0.0630713	Monocyte	CREBRF
ITGB2	1.92344e-06	0.499736	0.203	0.419	0.0645082	Monocyte	ITGB2
KPNA4	2.04581e-06	0.559705	0.116	0.27	0.0686122	Monocyte	KPNA4
STAT1	2.75582e-06	0.710194	0.123	0.278	0.0924248	Monocyte	STAT1
LYN	2.77599e-06	1.83299	0.256	0.196	0.0931012	Monocyte	LYN
IFNGR2	3.08064e-06	0.814226	0.11	0.257	0.103319	Monocyte	IFNGR2
C1orf561	3.18217e-06	0.791151	0.12	0.27	0.106724	Monocyte	C1orf56
OSER1	3.29289e-06	0.746431	0.11	0.255	0.110437	Monocyte	OSER1
SH3BP5	3.45705e-06	0.569683	0.116	0.265	0.115942	Monocyte	SH3BP5
USP8	3.53678e-06	0.664558	0.116	0.265	0.118617	Monocyte	USP8
USP34	3.6624e-06	0.499456	0.133	0.291	0.12283	Monocyte	USP34
ISG201	3.8246e-06	0.594594	0.146	0.314	0.128269	Monocyte	ISG20
NR3C11	3.85852e-06	0.870043	0.193	0.401	0.129407	Monocyte	NR3C1
ANKRD282	4.02651e-06	0.413846	0.113	0.256	0.135041	Monocyte	ANKRD28
H3F3B1	4.04098e-06	0.78863	0.811	0.964	0.135526	Monocyte	H3F3B
TMEM259	4.72477e-06	0.479405	0.11	0.252	0.158459	Monocyte	TMEM259
LAMP2	5.35729e-06	1.04844	0.133	0.293	0.179673	Monocyte	LAMP2
MAP3K8	8.14949e-06	0.593162	0.156	0.325	0.273317	Monocyte	MAP3K8
C6orf62	1.05541e-05	0.71395	0.116	0.258	0.353962	Monocyte	C6orf62
GCA	1.10204e-05	2.1648	0.252	0.2	0.369602	Monocyte	GCA
CTSD1	1.35211e-05	0.323229	0.289	0.536	0.45347	Monocyte	CTSD
PPP1R101	1.39485e-05	0.829069	0.233	0.463	0.467805	Monocyte	PPP1R10
GLIPR2	1.41689e-05	0.830941	0.133	0.284	0.475196	Monocyte	GLIPR2
AKIRIN2	1.54777e-05	0.7762	0.126	0.273	0.519093	Monocyte	AKIRIN2
CEBPB	1.60933e-05	1.44575	0.442	0.48	0.539737	Monocyte	CEBPB
ICAM31	1.62375e-05	0.875386	0.136	0.29	0.544573	Monocyte	ICAM3
TAOK31	1.73399e-05	0.750168	0.146	0.304	0.581546	Monocyte	TAOK3
MTRNR2L12	1.79378e-05	0.356234	0.395	0.764	0.601597	Monocyte	MTRNR2L12
SRRM2	1.84116e-05	0.6672	0.336	0.683	0.617487	Monocyte	SRRM2
AAK11	2.35304e-05	0.707076	0.156	0.319	0.789163	Monocyte	AAK1
EML41	3.11531e-05	0.66316	0.199	0.389	1	Monocyte	EML4
QKI	3.80737e-05	0.855292	0.189	0.377	1	Monocyte	QKI
IVNS1ABP	3.92261e-05	1.96522	0.266	0.222	1	Monocyte	IVNS1ABP
DYNC1H1	4.13619e-05	0.981663	0.156	0.314	1	Monocyte	DYNC1H1
PCF11	4.34187e-05	0.731319	0.126	0.263	1	Monocyte	PCF11
CDC42SE11	4.60867e-05	0.966379	0.173	0.344	1	Monocyte	CDC42SE1
ATP6V0D1	5.34386e-05	0.868149	0.146	0.296	1	Monocyte	ATP6V0D1
EFHD2	6.6344e-05	1.79212	0.362	0.375	1	Monocyte	EFHD2
NR4A21	7.21679e-05	0.530257	0.226	0.421	1	Monocyte	NR4A2
SAMSN12	8.20079e-05	1.7837	0.349	0.344	1	Monocyte	SAMSN1
ETF11	0.000102458	0.760142	0.126	0.257	1	Monocyte	ETF1
PRKDC	0.000114117	1.01073	0.156	0.307	1	Monocyte	PRKDC
SCAF11	0.000117013	0.958871	0.259	0.502	1	Monocyte	SCAF11
AKAP132	0.000147174	0.896833	0.269	0.515	1	Monocyte	AKAP13
ARPC31	0.000220552	0.434714	0.435	0.807	1	Monocyte	ARPC3
NRDC	0.000236901	0.837954	0.156	0.3	1	Monocyte	NRDC
CMTM61	0.00024798	1.20473	0.189	0.36	1	Monocyte	CMTM6
RNF1301	0.000256277	0.880053	0.173	0.327	1	Monocyte	RNF130
SLC2A32	0.000259891	0.892239	0.252	0.468	1	Monocyte	SLC2A3
NIPBL	0.000265663	0.93209	0.146	0.282	1	Monocyte	NIPBL
APLP2	0.000312283	0.754164	0.226	0.419	1	Monocyte	APLP2
RNF2131	0.000363799	0.78394	0.233	0.43	1	Monocyte	RNF213
KPNB1	0.00039351	0.971028	0.15	0.285	1	Monocyte	KPNB1
ALOX5AP2	0.000399031	1.98831	0.342	0.337	1	Monocyte	ALOX5AP
MTRNR2L8	0.000423801	0.858712	0.146	0.277	1	Monocyte	MTRNR2L8
LYZ	0.00042948	0.464765	0.312	0.243	1	Monocyte	LYZ
TLE4	0.000437175	0.697059	0.133	0.253	1	Monocyte	TLE4
WSB1	0.000457871	0.892853	0.246	0.459	1	Monocyte	WSB1
MGAT1	0.000525719	0.969375	0.173	0.322	1	Monocyte	MGAT1
RILPL2	0.000737115	1.05497	0.236	0.432	1	Monocyte	RILPL2
CYTIP1	0.000743664	0.437807	0.262	0.456	1	Monocyte	CYTIP
CTSL	0.000776967	0.559013	0.206	0.354	1	Monocyte	CTSL
RBPJ	0.000973448	0.985856	0.199	0.362	1	Monocyte	RBPJ
ACAP2	0.00109004	1.13206	0.183	0.332	1	Monocyte	ACAP2
IFRD1	0.00119305	1.11652	0.173	0.312	1	Monocyte	IFRD1
GPSM31	0.00129329	0.926817	0.239	0.427	1	Monocyte	GPSM3
PNRC11	0.0013021	0.318515	0.518	0.899	1	Monocyte	PNRC1
MBP1	0.00148669	0.755064	0.186	0.328	1	Monocyte	MBP
MIDN	0.00172396	1.14858	0.203	0.361	1	Monocyte	MIDN
ROCK1	0.0019028	0.905326	0.246	0.442	1	Monocyte	ROCK1
CD442	0.0019406	0.782665	0.302	0.535	1	Monocyte	CD44
CYBA	0.00196001	0.251908	0.462	0.743	1	Monocyte	CYBA
NOP10	0.00202053	1.24803	0.292	0.536	1	Monocyte	NOP10
IQGAP1	0.00213443	1.14668	0.272	0.494	1	Monocyte	IQGAP1
CSTB	0.00214791	0.757601	0.355	0.631	1	Monocyte	CSTB
PKN2	0.0026828	1.06958	0.163	0.288	1	Monocyte	PKN2
FCER1G1	0.00290364	0.488238	0.339	0.271	1	Monocyte	FCER1G
ZNF207	0.00293285	0.94337	0.179	0.313	1	Monocyte	ZNF207
FOSL21	0.00301255	0.884465	0.156	0.273	1	Monocyte	FOSL2
PDE4B1	0.00450608	0.80508	0.163	0.277	1	Monocyte	PDE4B
SHOC2	0.0047319	1.01602	0.146	0.254	1	Monocyte	SHOC2
SLA1	0.00609544	1.44816	0.296	0.3	1	Monocyte	SLA
IFITM21	0.00609962	2.95342	0.508	0.772	1	Monocyte	IFITM2
MCL12	0.00639268	1.20662	0.465	0.627	1	Monocyte	MCL1
ACTR2	0.0063971	0.978166	0.312	0.553	1	Monocyte	ACTR2
FAM49B	0.00749788	1.05413	0.209	0.357	1	Monocyte	FAM49B
CAP1	0.00756079	1.21813	0.312	0.563	1	Monocyte	CAP1
THBD	0.00807325	0.662491	0.159	0.263	1	Monocyte	THBD
CD551	0.00904298	1.87104	0.342	0.391	1	Monocyte	CD55
FCER1A1	0	3.3602	0.707	0.023	0	DC	FCER1A
HLA-DQA1	0	3.09971	0.98	0.281	0	DC	HLA-DQA1
HLA-DPB1	0	2.99387	0.994	0.533	0	DC	HLA-DPB1
HLA-DPA1	0	2.89896	0.997	0.565	0	DC	HLA-DPA1
HLA-DRA	0	2.84638	0.995	0.525	0	DC	HLA-DRA
HLA-DRB1	0	2.58507	0.997	0.607	0	DC	HLA-DRB1
CLEC10A	0	2.58037	0.669	0.052	0	DC	CLEC10A
HLA-DQB1	0	2.54216	0.977	0.333	0	DC	HLA-DQB1
CPVL	0	2.50733	0.822	0.182	0	DC	CPVL
LYZ1	0	2.34224	0.856	0.232	0	DC	LYZ
HLA-DRB5	0	2.31467	0.99	0.439	0	DC	HLA-DRB5
CD74	0	2.28628	1	0.731	0	DC	CD74
CST3	0	2.24724	0.991	0.595	0	DC	CST3
GPR1831	0	2.18929	0.948	0.375	0	DC	GPR183
IL1B	0	2.01606	0.617	0.108	0	DC	IL1B
CD1C	0	1.99228	0.536	0.008	0	DC	CD1C
INSIG1	0	1.92928	0.736	0.23	0	DC	INSIG1
HLA-DMA	0	1.89832	0.97	0.335	0	DC	HLA-DMA
MS4A6A	0	1.87069	0.839	0.161	0	DC	MS4A6A
FCGR2B	0	1.67104	0.611	0.103	0	DC	FCGR2B
HLA-DMB	0	1.65947	0.914	0.202	0	DC	HLA-DMB
MNDA1	0	1.6486	0.809	0.178	0	DC	MNDA
LGALS2	0	1.61879	0.512	0.02	0	DC	LGALS2
JAML	0	1.60239	0.815	0.113	0	DC	JAML
C1orf1621	0	1.46891	0.83	0.212	0	DC	C1orf162
PLEK1	0	1.41832	0.912	0.253	0	DC	PLEK
PTPRE1	0	1.4027	0.884	0.275	0	DC	PTPRE
IGSF6	0	1.39948	0.727	0.157	0	DC	IGSF6
PLD4	0	1.37502	0.525	0.024	0	DC	PLD4
IL1R2	0	1.36285	0.421	0.021	0	DC	IL1R2
FCER1G2	0	1.33863	0.919	0.26	0	DC	FCER1G
LST11	0	1.32041	0.781	0.188	0	DC	LST1
IRF8	0	1.32019	0.576	0.126	0	DC	IRF8
RAB11FIP11	0	1.31999	0.866	0.294	0	DC	RAB11FIP1
BASP11	0	1.31212	0.733	0.219	0	DC	BASP1
AIF11	0	1.30688	0.883	0.235	0	DC	AIF1
RNASE6	0	1.29748	0.765	0.137	0	DC	RNASE6
MRC1	0	1.28594	0.508	0.099	0	DC	MRC1
GRASP	0	1.25012	0.766	0.202	0	DC	GRASP
SPIB	0	1.22625	0.466	0.028	0	DC	SPIB
PKIB	0	1.21194	0.539	0.025	0	DC	PKIB
PHACTR11	0	1.20762	0.755	0.169	0	DC	PHACTR1
CD86	0	1.20411	0.704	0.137	0	DC	CD86
SPI11	0	1.19554	0.8	0.186	0	DC	SPI1
AC020656.1	0	1.14996	0.615	0.105	0	DC	AC020656.1
CCDC88A1	0	1.09708	0.816	0.239	0	DC	CCDC88A
IL181	0	1.06319	0.669	0.117	0	DC	IL18
CD1E	0	1.02893	0.337	0.002	0	DC	CD1E
CXCL161	0	1.00507	0.725	0.184	0	DC	CXCL16
IFI30	0	1.00085	0.661	0.165	0	DC	IFI30
CSF2RA	0	0.993138	0.623	0.075	0	DC	CSF2RA
CYBB	0	0.990594	0.727	0.172	0	DC	CYBB
SPINT21	0	0.960952	0.861	0.269	0	DC	SPINT2
CLEC7A	0	0.959986	0.693	0.147	0	DC	CLEC7A
PAK11	0	0.8595	0.637	0.11	0	DC	PAK1
CFP	0	0.858442	0.443	0.051	0	DC	CFP
SHTN1	0	0.850762	0.595	0.119	0	DC	SHTN1
GPAT3	0	0.830384	0.493	0.045	0	DC	GPAT3
LY86	0	0.827372	0.669	0.145	0	DC	LY86
BCL11A	0	0.824229	0.376	0.034	0	DC	BCL11A
NR4A3	0	0.818574	0.586	0.127	0	DC	NR4A3
LYN1	0	0.784878	0.716	0.187	0	DC	LYN
DAPP1	0	0.730348	0.487	0.077	0	DC	DAPP1
CLEC4A	0	0.72043	0.479	0.068	0	DC	CLEC4A
IRF4	0	0.712781	0.301	0.035	0	DC	IRF4
TSPAN33	0	0.693609	0.464	0.055	0	DC	TSPAN33
P2RY13	0	0.687945	0.432	0.067	0	DC	P2RY13
P2RY14	0	0.668967	0.368	0.018	0	DC	P2RY14
2023-03-01	0	0.654958	0.544	0.103	0	DC	2023-03-01
GNA15	0	0.649545	0.501	0.078	0	DC	GNA15
HCK	0	0.637773	0.562	0.105	0	DC	HCK
MIR181A1HG	0	0.633035	0.475	0.065	0	DC	MIR181A1HG
SLAMF8	0	0.598731	0.419	0.071	0	DC	SLAMF8
GAPT	0	0.582898	0.37	0.051	0	DC	GAPT
CIITA	0	0.564147	0.398	0.052	0	DC	CIITA
SERPINF1	0	0.561082	0.575	0.113	0	DC	SERPINF1
HLA-DQB2	0	0.469777	0.256	0.021	0	DC	HLA-DQB2
RGS18	0	0.453471	0.353	0.043	0	DC	RGS18
CD1D	0	0.450837	0.328	0.03	0	DC	CD1D
FGD2	0	0.428936	0.355	0.05	0	DC	FGD2
FLT3	0	0.410883	0.26	0.004	0	DC	FLT3
AFF3	0	0.398426	0.266	0.017	0	DC	AFF3
CACNA2D3	0	0.351586	0.25	0.021	0	DC	CACNA2D3
PLAUR2	3.3613e-302	1.2811	0.818	0.266	1.12731e-297	DC	PLAUR
CTSH	6.5559e-301	1.30616	0.837	0.303	2.19872e-296	DC	CTSH
BID	4.61906e-298	0.886526	0.703	0.196	1.54914e-293	DC	BID
CD72	1.32587e-295	0.434351	0.368	0.057	4.4467e-291	DC	CD72
SLC8A1	1.55332e-293	0.722604	0.532	0.117	5.20954e-289	DC	SLC8A1
OGFRL1	4.77524e-293	0.778903	0.594	0.142	1.60152e-288	DC	OGFRL1
ITGAX1	5.80137e-292	0.693886	0.532	0.115	1.94566e-287	DC	ITGAX
HDAC9	1.12111e-290	0.431731	0.353	0.054	3.75998e-286	DC	HDAC9
CD831	1.11564e-288	1.27507	0.83	0.266	3.74163e-284	DC	CD83
GCA1	2.84313e-287	0.784448	0.686	0.191	9.53528e-283	DC	GCA
RNF144B	2.19189e-286	0.575106	0.418	0.075	7.35116e-282	DC	RNF144B
SERPINA1	4.53684e-283	0.811645	0.608	0.144	1.52157e-278	DC	SERPINA1
THEMIS2	1.79027e-282	0.633619	0.542	0.122	6.0042e-278	DC	THEMIS2
AP1S21	9.90678e-279	1.05637	0.833	0.302	3.32253e-274	DC	AP1S2
TYROBP1	1.54187e-274	0.993817	0.939	0.285	5.17113e-270	DC	TYROBP
VMO1	2.14021e-274	0.72152	0.443	0.086	7.17785e-270	DC	VMO1
AREG1	2.02099e-271	2.06815	0.661	0.201	6.77799e-267	DC	AREG
FGL2	1.92288e-269	1.11874	0.799	0.272	6.44897e-265	DC	FGL2
ALDH2	1.52292e-268	1.07885	0.816	0.296	5.10758e-264	DC	ALDH2
HLA-DOA	1.22236e-267	0.439784	0.372	0.063	4.09954e-263	DC	HLA-DOA
SGK11	1.40145e-267	1.49123	0.778	0.279	4.70017e-263	DC	SGK1
NLRP3	5.84521e-266	0.659468	0.403	0.074	1.96037e-261	DC	NLRP3
CXorf21	1.42108e-265	0.753835	0.396	0.073	4.76601e-261	DC	CXorf21
F13A1	3.91278e-263	0.544367	0.492	0.104	1.31227e-258	DC	F13A1
KYNU	2.38341e-262	0.452871	0.417	0.079	7.99349e-258	DC	KYNU
IMPA2	3.97525e-258	0.372854	0.369	0.065	1.33322e-253	DC	IMPA2
SYK	1.72589e-256	0.478317	0.459	0.095	5.78829e-252	DC	SYK
RGS22	7.78845e-256	1.30328	0.832	0.312	2.61209e-251	DC	RGS2
OPN3	1.16932e-255	0.462454	0.334	0.055	3.92166e-251	DC	OPN3
CD4	2.36694e-253	0.599257	0.578	0.141	7.93826e-249	DC	CD4
RASSF4	1.05942e-251	0.719864	0.569	0.141	3.55308e-247	DC	RASSF4
OTULINL	4.10372e-251	0.54967	0.536	0.125	1.3763e-246	DC	OTULINL
CSTA	1.67433e-250	0.6923	0.468	0.102	5.61535e-246	DC	CSTA
PYCARD1	1.56005e-247	1.02951	0.865	0.351	5.23208e-243	DC	PYCARD
CD331	3.04042e-247	0.459614	0.4	0.078	1.0197e-242	DC	CD33
TNFSF13B	1.73853e-245	0.657596	0.644	0.173	5.83067e-241	DC	TNFSF13B
TYMP1	3.10585e-240	1.07645	0.899	0.383	1.04164e-235	DC	TYMP
PARVG	2.25757e-238	0.485451	0.584	0.148	7.57144e-234	DC	PARVG
SAMHD11	1.1906e-237	0.93675	0.853	0.342	3.99304e-233	DC	SAMHD1
FAM49A	5.03463e-237	0.514893	0.444	0.097	1.68851e-232	DC	FAM49A
CTSZ	1.21512e-234	0.935028	0.951	0.468	4.07527e-230	DC	CTSZ
P2RY6	5.05456e-233	0.315089	0.264	0.038	1.6952e-228	DC	P2RY6
C19orf38	7.85638e-233	0.299065	0.304	0.049	2.63487e-228	DC	C19orf38
SMCO4	3.07427e-232	0.599152	0.573	0.156	1.03105e-227	DC	SMCO4
LILRB4	1.73802e-230	0.680727	0.538	0.135	5.82896e-226	DC	LILRB4
GK1	1.912e-228	0.681655	0.561	0.147	6.41247e-224	DC	GK
STX11	3.1071e-228	0.618088	0.586	0.159	1.04206e-223	DC	STX11
H2AFY1	4.85572e-228	0.891344	0.891	0.395	1.62851e-223	DC	H2AFY
VAMP81	1.57368e-227	0.985252	0.938	0.414	5.2778e-223	DC	VAMP8
CLN8	4.56958e-226	0.67451	0.464	0.11	1.53255e-221	DC	CLN8
METRNL	7.71626e-225	1.12064	0.868	0.396	2.58788e-220	DC	METRNL
CLEC12A	3.38784e-224	0.369567	0.322	0.056	1.13621e-219	DC	CLEC12A
CTSS1	3.39309e-224	0.739413	0.944	0.404	1.13797e-219	DC	CTSS
GRN1	2.48967e-223	0.853774	0.903	0.375	8.34985e-219	DC	GRN
HMGA1	2.14329e-221	0.618906	0.689	0.212	7.18818e-217	DC	HMGA1
IGFLR1	4.15571e-221	0.301728	0.314	0.054	1.39374e-216	DC	IGFLR1
C15orf48	3.10328e-218	1.02565	0.466	0.11	1.04078e-213	DC	C15orf48
HPS5	2.86351e-217	0.415591	0.399	0.085	9.60363e-213	DC	HPS5
C12orf45	5.60989e-217	0.735354	0.543	0.15	1.88145e-212	DC	C12orf45
TET2	8.45947e-217	0.50198	0.532	0.139	2.83714e-212	DC	TET2
NCF2	2.30086e-216	0.567642	0.506	0.126	7.71662e-212	DC	NCF2
COTL1	7.56666e-216	1.40981	0.867	0.501	2.53771e-211	DC	COTL1
FGR	1.9897e-215	0.432351	0.434	0.097	6.67305e-211	DC	FGR
C20orf27	8.28268e-213	0.578251	0.574	0.165	2.77785e-208	DC	C20orf27
FBP1	1.01585e-212	0.443321	0.508	0.126	3.40697e-208	DC	FBP1
TIGAR	7.50335e-212	0.390149	0.441	0.102	2.51647e-207	DC	TIGAR
CAT	1.15168e-209	0.713115	0.706	0.245	3.8625e-205	DC	CAT
RGS102	2.38752e-209	1.01085	0.89	0.406	8.00726e-205	DC	RGS10
PLBD1	2.63232e-209	0.516284	0.539	0.145	8.82828e-205	DC	PLBD1
HERPUD1	5.03778e-206	1.65787	0.949	0.634	1.68957e-201	DC	HERPUD1
HAVCR2	3.3666e-204	0.524586	0.476	0.119	1.12909e-199	DC	HAVCR2
UCP21	4.18182e-204	0.83165	0.803	0.296	1.4025e-199	DC	UCP2
MYD88	7.61602e-203	0.435718	0.47	0.116	2.55426e-198	DC	MYD88
PPIF	1.49723e-200	0.743932	0.523	0.146	5.0214e-196	DC	PPIF
FCGR2A	3.47464e-200	0.894888	0.587	0.175	1.16533e-195	DC	FCGR2A
FAM49B1	2.73594e-199	0.736632	0.867	0.347	9.17579e-195	DC	FAM49B
ACAA1	1.84463e-198	0.678719	0.667	0.23	6.18653e-194	DC	ACAA1
H3F3A1	2.12305e-198	0.815579	0.99	0.904	7.12029e-194	DC	H3F3A
SLC25A19	9.27131e-198	0.372681	0.36	0.076	3.10941e-193	DC	SLC25A19
BATF3	3.12932e-197	0.438675	0.288	0.052	1.04951e-192	DC	BATF3
ADAM28	1.78979e-194	0.380026	0.339	0.069	6.00258e-190	DC	ADAM28
AOAH	2.21799e-193	0.469781	0.499	0.128	7.43869e-189	DC	AOAH
ZNF385A	2.24491e-193	0.400538	0.418	0.099	7.52897e-189	DC	ZNF385A
PTRHD1	3.36304e-193	0.580964	0.656	0.218	1.1279e-188	DC	PTRHD1
CKS2	4.55168e-193	0.72006	0.612	0.194	1.52654e-188	DC	CKS2
ADAM19	2.15125e-192	0.335637	0.306	0.056	7.21488e-188	DC	ADAM19
RAB321	8.53742e-190	0.859842	0.664	0.24	2.86328e-185	DC	RAB32
RNASET2	1.79572e-189	0.874131	0.907	0.415	6.0225e-185	DC	RNASET2
MIF4GD	1.95935e-189	0.504016	0.574	0.173	6.57127e-185	DC	MIF4GD
B3GNT5	3.8778e-189	0.476259	0.33	0.068	1.30054e-184	DC	B3GNT5
PPA1	1.33382e-188	1.26863	0.793	0.395	4.47337e-184	DC	PPA1
AC004687.1	4.03287e-188	0.399516	0.463	0.115	1.35254e-183	DC	AC004687.1
FPR11	4.2964e-186	0.577921	0.442	0.112	1.44093e-181	DC	FPR1
ATG3	6.01891e-186	0.76724	0.781	0.326	2.01862e-181	DC	ATG3
ATP1B1	9.65603e-186	0.622761	0.586	0.181	3.23844e-181	DC	ATP1B1
NAGK1	1.59198e-185	0.628865	0.758	0.279	5.33918e-181	DC	NAGK
FES	6.59891e-185	0.325646	0.332	0.069	2.21314e-180	DC	FES
MPEG1	3.21269e-184	0.451247	0.387	0.089	1.07747e-179	DC	MPEG1
PLSCR11	5.73466e-184	0.959743	0.809	0.36	1.92329e-179	DC	PLSCR1
IL13RA1	1.80928e-183	0.648624	0.596	0.198	6.06795e-179	DC	IL13RA1
NRARP	1.84127e-183	0.567325	0.366	0.083	6.17525e-179	DC	NRARP
LSP11	4.50544e-183	0.824938	0.897	0.397	1.51103e-178	DC	LSP1
LAT21	1.06335e-182	0.350918	0.442	0.109	3.56627e-178	DC	LAT2
PLEKHO11	2.52533e-182	0.708896	0.763	0.291	8.46945e-178	DC	PLEKHO1
CYBA1	5.46705e-182	0.977037	0.986	0.737	1.83354e-177	DC	CYBA
ARID3A	1.10818e-181	0.384533	0.277	0.051	3.71662e-177	DC	ARID3A
SERPINB9	6.27905e-180	0.826972	0.611	0.205	2.10587e-175	DC	SERPINB9
RIPK2	3.77011e-177	0.545773	0.505	0.148	1.26442e-172	DC	RIPK2
BRI3BP	4.37646e-177	0.328151	0.353	0.078	1.46778e-172	DC	BRI3BP
NAGA	1.1648e-176	0.378036	0.397	0.096	3.9065e-172	DC	NAGA
LAP3	3.5072e-176	0.850965	0.812	0.364	1.17625e-171	DC	LAP3
LGALS9	7.27327e-175	0.50719	0.593	0.185	2.43931e-170	DC	LGALS9
DBI1	2.9308e-174	1.02863	0.928	0.588	9.82932e-170	DC	DBI
APAF1	1.63912e-173	0.361233	0.356	0.08	5.49728e-169	DC	APAF1
HACD4	1.42813e-171	0.373423	0.449	0.118	4.78966e-167	DC	HACD4
KCNK6	3.01642e-171	0.379779	0.321	0.069	1.01165e-166	DC	KCNK6
MXD11	5.58467e-171	0.498104	0.469	0.131	1.87299e-166	DC	MXD1
RAB31	5.64287e-171	0.600647	0.637	0.222	1.8925e-166	DC	RAB31
SNX10	9.54928e-171	0.418288	0.492	0.137	3.20264e-166	DC	SNX10
TBXAS1	2.95983e-170	0.380508	0.469	0.127	9.92668e-166	DC	TBXAS1
SAT11	3.23087e-170	1.06256	0.973	0.673	1.08357e-165	DC	SAT1
ETV6	1.95686e-169	0.468917	0.543	0.166	6.5629e-165	DC	ETV6
ARPC32	1.11626e-168	0.79286	0.969	0.802	3.74372e-164	DC	ARPC3
TMSB10	8.98724e-167	0.850241	0.992	0.951	3.01414e-162	DC	TMSB10
RALA	9.11786e-167	0.710672	0.731	0.296	3.05795e-162	DC	RALA
LPCAT21	9.68226e-167	0.485861	0.494	0.145	3.24724e-162	DC	LPCAT2
BTK1	1.30877e-166	0.255432	0.316	0.067	4.38935e-162	DC	BTK
FTH12	1.81065e-166	0.610039	0.999	0.976	6.07255e-162	DC	FTH1
LILRB3	1.19422e-165	0.396085	0.368	0.089	4.00517e-161	DC	LILRB3
PTPN61	1.41917e-165	0.450443	0.626	0.204	4.75961e-161	DC	PTPN6
HMOX1	5.36789e-165	0.824146	0.574	0.191	1.80028e-160	DC	HMOX1
NFKBID1	1.55625e-164	0.397295	0.61	0.194	5.21937e-160	DC	NFKBID
KLF4	8.35963e-164	0.856313	0.742	0.294	2.80365e-159	DC	KLF4
PTPN1	8.41938e-164	0.661269	0.741	0.3	2.82369e-159	DC	PTPN1
VSIG4	8.79394e-164	0.817299	0.42	0.114	2.94931e-159	DC	VSIG4
CXCL81	3.02066e-163	1.12832	0.486	0.146	1.01307e-158	DC	CXCL8
GRK3	4.05938e-163	0.295185	0.279	0.056	1.36143e-158	DC	GRK3
RPS6KA4	1.55649e-162	0.309723	0.297	0.062	5.22017e-158	DC	RPS6KA4
CX3CR1	3.34571e-162	0.349459	0.25	0.045	1.12209e-157	DC	CX3CR1
ATP6V0B1	1.70349e-161	0.757187	0.943	0.545	5.71316e-157	DC	ATP6V0B
REL2	2.32161e-161	0.792468	0.929	0.463	7.78622e-157	DC	REL
IRF7	5.67217e-161	1.62321	0.524	0.175	1.90233e-156	DC	IRF7
CNPY31	6.19007e-161	0.601841	0.753	0.296	2.07603e-156	DC	CNPY3
SDE2	1.8596e-160	0.394652	0.438	0.119	6.23672e-156	DC	SDE2
MCM5	7.71952e-158	0.315016	0.324	0.073	2.58897e-153	DC	MCM5
RELT	5.69791e-157	0.31019	0.299	0.064	1.91097e-152	DC	RELT
CD300A	3.42024e-156	0.387685	0.462	0.131	1.14708e-151	DC	CD300A
ALG2	5.05191e-156	0.42769	0.448	0.129	1.69431e-151	DC	ALG2
EFHD21	5.34579e-156	0.660952	0.84	0.367	1.79287e-151	DC	EFHD2
SLC12A9	1.25198e-155	0.277354	0.355	0.085	4.19888e-151	DC	SLC12A9
LDLRAD4	2.37976e-154	0.475672	0.464	0.134	7.98123e-150	DC	LDLRAD4
NAMPT1	1.46605e-153	0.769697	0.85	0.429	4.91685e-149	DC	NAMPT
SERPINB12	3.40492e-153	0.904303	0.862	0.472	1.14194e-148	DC	SERPINB1
GLIPR1	9.80478e-153	0.684745	0.861	0.406	3.28833e-148	DC	GLIPR1
CCDC50	1.29868e-152	0.997784	0.61	0.23	4.35552e-148	DC	CCDC50
UGCG	1.43272e-152	0.80971	0.616	0.224	4.80507e-148	DC	UGCG
GNG7	1.49593e-152	0.303629	0.271	0.055	5.01707e-148	DC	GNG7
TRAF4	2.39415e-152	0.422972	0.339	0.08	8.02949e-148	DC	TRAF4
CMTM62	1.01322e-151	0.640974	0.802	0.351	3.39814e-147	DC	CMTM6
HLA-DQA2	3.55256e-151	1.55342	0.41	0.12	1.19146e-146	DC	HLA-DQA2
DCK	8.23492e-151	0.412289	0.426	0.118	2.76183e-146	DC	DCK
PTPN2	1.43942e-150	0.538217	0.742	0.302	4.82753e-146	DC	PTPN2
RNF1302	2.10736e-149	0.678051	0.74	0.318	7.06767e-145	DC	RNF130
IL16	4.15017e-149	0.303807	0.457	0.128	1.39189e-144	DC	IL16
MTMR14	2.07424e-148	0.333475	0.428	0.12	6.95658e-144	DC	MTMR14
CSF1R	1.39678e-146	0.402635	0.434	0.123	4.68451e-142	DC	CSF1R
SKAP2	1.24612e-145	0.46281	0.595	0.206	4.17923e-141	DC	SKAP2
RASSF2	1.72685e-145	0.336243	0.35	0.087	5.7915e-141	DC	RASSF2
PPT11	1.84588e-145	0.651268	0.677	0.275	6.19071e-141	DC	PPT1
MAP3K81	8.11661e-145	0.607355	0.757	0.316	2.72215e-140	DC	MAP3K8
SLC31A2	3.26586e-144	0.427541	0.453	0.136	1.09531e-139	DC	SLC31A2
CHMP1B	6.07352e-144	0.791903	0.703	0.296	2.03694e-139	DC	CHMP1B
EAF2	1.00879e-143	0.310354	0.362	0.094	3.38329e-139	DC	EAF2
EMILIN21	2.09355e-142	0.387605	0.477	0.145	7.02136e-138	DC	EMILIN2
ADA2	7.21902e-142	0.35127	0.384	0.104	2.42111e-137	DC	ADA2
UNC93B1	1.03013e-141	0.43647	0.468	0.146	3.45485e-137	DC	UNC93B1
CAPG1	1.57657e-141	0.552862	0.726	0.283	5.28751e-137	DC	CAPG
FAM96A	4.30993e-141	0.43564	0.628	0.228	1.44547e-136	DC	FAM96A
SLC25A5	4.48961e-141	0.783643	0.932	0.637	1.50573e-136	DC	SLC25A5
SNRNP25	9.01888e-141	0.384927	0.449	0.136	3.02475e-136	DC	SNRNP25
SCIMP	1.10772e-140	0.277418	0.287	0.064	3.71506e-136	DC	SCIMP
PGLS	3.40438e-140	0.722081	0.86	0.456	1.14176e-135	DC	PGLS
TM6SF1	7.67074e-140	0.315386	0.319	0.078	2.57261e-135	DC	TM6SF1
EIF2AK4	1.03484e-139	0.477409	0.516	0.174	3.47066e-135	DC	EIF2AK4
FCGRT	9.33725e-139	0.610064	0.881	0.424	3.13153e-134	DC	FCGRT
VEGFA1	1.09293e-137	0.622889	0.412	0.126	3.66546e-133	DC	VEGFA
TNFAIP8L2	5.13865e-137	0.264058	0.274	0.061	1.7234e-132	DC	TNFAIP8L2
KPNA2	1.21118e-136	0.415321	0.597	0.211	4.06206e-132	DC	KPNA2
POU2F2	2.43462e-136	0.396255	0.434	0.129	8.16521e-132	DC	POU2F2
LITAF1	1.00926e-135	0.777575	0.869	0.474	3.38485e-131	DC	LITAF
IFNGR11	6.64658e-135	0.760695	0.865	0.446	2.22913e-130	DC	IFNGR1
RCC2	8.55001e-135	0.265627	0.352	0.092	2.8675e-130	DC	RCC2
CLIC2	2.78239e-134	0.345133	0.343	0.09	9.33157e-130	DC	CLIC2
MIS18BP11	9.136e-134	0.536784	0.647	0.253	3.06403e-129	DC	MIS18BP1
SRGN3	9.90626e-134	0.792723	0.993	0.772	3.32236e-129	DC	SRGN
CYTH4	1.00299e-133	0.32101	0.4	0.113	3.36383e-129	DC	CYTH4
FERMT3	2.14441e-133	0.422785	0.65	0.236	7.19192e-129	DC	FERMT3
RCOR1	3.96057e-133	0.311799	0.413	0.121	1.3283e-128	DC	RCOR1
SLC16A3	2.39096e-132	0.402014	0.532	0.181	8.01879e-128	DC	SLC16A3
CDKN1A	3.86372e-132	0.586743	0.753	0.324	1.29582e-127	DC	CDKN1A
CKLF3	1.94233e-131	0.78359	0.821	0.433	6.51417e-127	DC	CKLF
EIF4A3	2.19396e-131	0.733138	0.76	0.354	7.35811e-127	DC	EIF4A3
ETF12	2.18853e-130	0.452651	0.635	0.249	7.33989e-126	DC	ETF1
DSE	2.64436e-130	0.429489	0.49	0.162	8.86864e-126	DC	DSE
HCLS11	3.34895e-130	0.495402	0.781	0.324	1.12317e-125	DC	HCLS1
TKT1	6.71229e-130	0.644963	0.824	0.419	2.25117e-125	DC	TKT
TGFBI	1.47258e-129	0.353128	0.471	0.149	4.93874e-125	DC	TGFBI
CEBPD	2.44264e-129	1.07586	0.845	0.527	8.19211e-125	DC	CEBPD
AP2S1	6.83927e-129	0.619069	0.859	0.445	2.29375e-124	DC	AP2S1
SNX8	1.70122e-128	0.261115	0.328	0.085	5.70556e-124	DC	SNX8
CD552	3.85692e-128	0.570457	0.814	0.383	1.29353e-123	DC	CD55
LCP11	5.11619e-128	0.629343	0.927	0.469	1.71587e-123	DC	LCP1
STX7	1.77966e-127	0.43248	0.608	0.229	5.96862e-123	DC	STX7
NDRG2	4.00509e-127	0.280675	0.346	0.091	1.34323e-122	DC	NDRG2
SYNGR2	4.08449e-127	0.526766	0.753	0.322	1.36986e-122	DC	SYNGR2
SMAP21	1.12496e-126	0.593098	0.847	0.397	3.77288e-122	DC	SMAP2
ITGB21	1.71968e-126	0.702204	0.834	0.41	5.76747e-122	DC	ITGB2
N4BP2	2.50067e-125	0.298351	0.304	0.076	8.38674e-121	DC	N4BP2
ALOX51	7.54413e-125	0.318404	0.361	0.102	2.53015e-120	DC	ALOX5
WAS	7.80152e-125	0.343716	0.566	0.198	2.61647e-120	DC	WAS
UVRAG	1.19454e-124	0.450009	0.537	0.194	4.00626e-120	DC	UVRAG
QPCT	5.33778e-124	0.257736	0.251	0.056	1.79018e-119	DC	QPCT
FPR3	1.18947e-123	0.366455	0.292	0.073	3.98924e-119	DC	FPR3
CREB5	6.65981e-123	0.343094	0.322	0.086	2.23357e-118	DC	CREB5
NUDT11	7.90275e-123	0.359683	0.578	0.21	2.65042e-118	DC	NUDT1
TPMT	1.213e-122	0.293713	0.378	0.111	4.06816e-118	DC	TPMT
GZF1	1.29649e-122	0.328181	0.351	0.097	4.34817e-118	DC	GZF1
SEPT61	2.22514e-122	0.388949	0.718	0.291	7.46267e-118	DC	SEPT6
OTUD1	1.08108e-120	0.627921	0.498	0.178	3.62573e-116	DC	OTUD1
ARPC1B	1.17949e-120	0.697585	0.913	0.568	3.95577e-116	DC	ARPC1B
EDEM1	2.84749e-120	0.256023	0.383	0.112	9.54991e-116	DC	EDEM1
ATP1B31	2.85384e-120	0.912641	0.765	0.403	9.57122e-116	DC	ATP1B3
SRGAP2B	3.45802e-120	0.262174	0.265	0.063	1.15975e-115	DC	SRGAP2B
PLAC8	4.28826e-120	1.07084	0.336	0.096	1.4382e-115	DC	PLAC8
CTTNBP2NL	4.75603e-120	0.380728	0.433	0.141	1.59508e-115	DC	CTTNBP2NL
RBM47	4.94343e-120	0.328184	0.33	0.091	1.65793e-115	DC	RBM47
FAM53C	6.24917e-120	0.279972	0.413	0.126	2.09585e-115	DC	FAM53C
UNC119	4.04474e-119	0.278572	0.388	0.116	1.35653e-114	DC	UNC119
UBE2F	8.52509e-119	0.338648	0.475	0.16	2.85914e-114	DC	UBE2F
TBC1D9	1.21085e-118	0.295942	0.275	0.068	4.06097e-114	DC	TBC1D9
BZW2	2.33825e-118	0.321188	0.439	0.142	7.84201e-114	DC	BZW2
SCNM1	3.09188e-118	0.33363	0.509	0.18	1.03696e-113	DC	SCNM1
C9orf72	3.34219e-118	0.255681	0.365	0.105	1.12091e-113	DC	C9orf72
PSTPIP2	5.64187e-118	0.257744	0.272	0.065	1.89217e-113	DC	PSTPIP2
OAZ1	8.44273e-117	0.559283	0.979	0.863	2.83152e-112	DC	OAZ1
GSTP1	1.32382e-116	0.907008	0.951	0.686	4.43983e-112	DC	GSTP1
NABP12	1.56907e-116	0.381252	0.572	0.213	5.26235e-112	DC	NABP1
CHML	4.46799e-116	0.393683	0.289	0.075	1.49848e-111	DC	CHML
DPYSL2	4.65967e-116	0.408996	0.669	0.274	1.56276e-111	DC	DPYSL2
CTNNBIP1	5.49667e-116	0.282475	0.38	0.115	1.84347e-111	DC	CTNNBIP1
FUOM	2.32207e-115	0.328772	0.493	0.17	7.78775e-111	DC	FUOM
CNDP2	5.30993e-115	0.352302	0.506	0.18	1.78085e-110	DC	CNDP2
ATP6V0D11	1.04167e-114	0.386692	0.693	0.288	3.49356e-110	DC	ATP6V0D1
BCL2A11	2.12469e-114	0.494236	0.578	0.214	7.12579e-110	DC	BCL2A1
DUSP51	4.54015e-114	0.867297	0.582	0.243	1.52267e-109	DC	DUSP5
PABPC42	1.27649e-113	0.516689	0.613	0.258	4.28109e-109	DC	PABPC4
GDI2	1.83619e-113	0.581996	0.807	0.42	6.15821e-109	DC	GDI2
SPECC11	2.18767e-113	0.280215	0.381	0.115	7.33702e-109	DC	SPECC1
MEF2C	2.31776e-113	0.509942	0.775	0.361	7.77331e-109	DC	MEF2C
DNAJC4	2.46829e-113	0.388223	0.566	0.218	8.27817e-109	DC	DNAJC4
MAP2K3	5.8306e-113	0.419306	0.491	0.177	1.95547e-108	DC	MAP2K3
SINHCAF	7.32634e-113	0.305092	0.55	0.198	2.45711e-108	DC	SINHCAF
ATF5	2.02e-112	0.421249	0.42	0.138	6.77468e-108	DC	ATF5
SERP12	4.00845e-112	0.626622	0.935	0.643	1.34435e-107	DC	SERP1
RPS9	4.21749e-112	0.521246	0.99	0.932	1.41446e-107	DC	RPS9
CERS6	1.31868e-111	0.311437	0.258	0.063	4.42259e-107	DC	CERS6
YIF1B	4.52698e-111	0.273594	0.388	0.121	1.51826e-106	DC	YIF1B
RAP2B1	8.13686e-111	0.366023	0.623	0.246	2.72894e-106	DC	RAP2B
EVI2A1	1.61783e-110	0.293282	0.569	0.209	5.42589e-106	DC	EVI2A
RAB20	2.07686e-110	0.342746	0.444	0.149	6.96538e-106	DC	RAB20
MAT2A	2.93901e-110	0.397812	0.534	0.203	9.85686e-106	DC	MAT2A
DBNL1	1.50579e-109	0.416741	0.626	0.26	5.05011e-105	DC	DBNL
ARRB2	1.7334e-109	0.335958	0.627	0.241	5.81348e-105	DC	ARRB2
NAAA	3.04982e-109	0.479711	0.472	0.17	1.02285e-104	DC	NAAA
SSR31	3.74061e-109	0.561963	0.877	0.468	1.25453e-104	DC	SSR3
GRB21	4.15804e-109	0.520613	0.877	0.467	1.39452e-104	DC	GRB2
PRKCB1	4.95742e-109	0.286543	0.375	0.113	1.66262e-104	DC	PRKCB
APEX1	9.41065e-109	0.526262	0.767	0.38	3.15614e-104	DC	APEX1
NFE2L21	2.16772e-108	0.673177	0.877	0.529	7.27009e-104	DC	NFE2L2
HBEGF	7.29759e-108	0.62754	0.443	0.16	2.44747e-103	DC	HBEGF
NCF41	8.90123e-108	0.309488	0.505	0.179	2.9853e-103	DC	NCF4
POLB	1.12837e-107	0.420379	0.308	0.087	3.78434e-103	DC	POLB
SYAP11	1.3242e-107	0.596013	0.699	0.322	4.44112e-103	DC	SYAP1
PMAIP1	3.32884e-107	0.5646	0.478	0.171	1.11643e-102	DC	PMAIP1
SH2B3	8.39154e-107	0.270812	0.299	0.082	2.81435e-102	DC	SH2B3
SUPT4H1	9.95309e-107	0.433001	0.756	0.351	3.33807e-102	DC	SUPT4H1
RASSF51	3.30896e-106	0.258953	0.436	0.142	1.10976e-101	DC	RASSF5
PABPC11	7.69661e-106	0.598379	0.975	0.76	2.58129e-101	DC	PABPC1
NFKB11	1.16761e-105	0.400705	0.497	0.185	3.91594e-101	DC	NFKB1
PQLC1	4.92561e-105	0.341365	0.497	0.184	1.65195e-100	DC	PQLC1
SLC7A5	4.96678e-105	0.354575	0.252	0.063	1.66576e-100	DC	SLC7A5
RPS241	1.002e-104	0.458928	0.992	0.967	3.36052e-100	DC	RPS24
RPS111	1.32555e-104	0.651414	0.986	0.894	4.44563e-100	DC	RPS11
NCKAP1L	2.14488e-104	0.286378	0.44	0.148	7.19349e-100	DC	NCKAP1L
TLR2	2.32393e-104	0.372648	0.346	0.106	7.794e-100	DC	TLR2
TFEC	2.64161e-104	0.275423	0.286	0.078	8.85943e-100	DC	TFEC
BCL2L11	3.56704e-104	0.288056	0.291	0.08	1.19631e-99	DC	BCL2L11
TRIM38	4.4913e-104	0.359205	0.587	0.236	1.50629e-99	DC	TRIM38
RASGEF1B1	5.432e-104	0.37438	0.591	0.233	1.82178e-99	DC	RASGEF1B
RPS3A1	6.93515e-104	0.499388	0.988	0.95	2.32591e-99	DC	RPS3A
ATP2B1	7.2427e-104	0.521699	0.769	0.379	2.42906e-99	DC	ATP2B1
AVPI1	1.27932e-103	0.328422	0.343	0.105	4.29058e-99	DC	AVPI1
ACTB	1.54807e-103	0.818304	0.998	0.974	5.19192e-99	DC	ACTB
YBX1	4.92657e-103	0.558884	0.973	0.851	1.65227e-98	DC	YBX1
TRABD	7.1285e-103	0.276839	0.543	0.205	2.39076e-98	DC	TRABD
MFSD1	8.1898e-103	0.326427	0.579	0.227	2.7467e-98	DC	MFSD1
RGS19	7.44547e-102	0.340336	0.637	0.26	2.49706e-97	DC	RGS19
C3orf58	4.62931e-101	0.352968	0.403	0.136	1.55258e-96	DC	C3orf58
SFT2D11	1.62068e-100	0.332772	0.61	0.253	5.43542e-96	DC	SFT2D1
OXSR1	1.84208e-100	0.277326	0.372	0.119	6.17795e-96	DC	OXSR1
RGS12	2.01366e-100	0.434721	0.706	0.311	6.75342e-96	DC	RGS1
VASP	2.45801e-100	0.493499	0.726	0.351	8.24367e-96	DC	VASP
TAOK32	1.17421e-99	0.366965	0.674	0.297	3.93807e-95	DC	TAOK3
RNF1491	1.91921e-99	0.402053	0.7	0.31	6.43664e-95	DC	RNF149
M6PR1	2.10486e-99	0.414548	0.747	0.344	7.05926e-95	DC	M6PR
COX5A	6.34411e-99	0.567843	0.888	0.531	2.12769e-94	DC	COX5A
LY961	8.74424e-99	0.367632	0.6	0.25	2.93264e-94	DC	LY96
GLA	1.03691e-98	0.374222	0.398	0.138	3.47759e-94	DC	GLA
CACUL1	1.14249e-98	0.280388	0.428	0.151	3.8317e-94	DC	CACUL1
NCOA4	5.1197e-97	0.324672	0.569	0.231	1.71704e-92	DC	NCOA4
UCHL3	8.93186e-97	0.31647	0.466	0.174	2.99557e-92	DC	UCHL3
PLEKHB2	9.40071e-97	0.343483	0.529	0.21	3.15281e-92	DC	PLEKHB2
CPPED1	1.05333e-96	0.281743	0.37	0.123	3.53266e-92	DC	CPPED1
ALCAM	1.77682e-96	0.358039	0.434	0.155	5.95908e-92	DC	ALCAM
TWF21	2.91792e-96	0.39042	0.705	0.321	9.7861e-92	DC	TWF2
RPL15	3.00291e-96	0.467571	0.995	0.935	1.00712e-91	DC	RPL15
BCL31	3.00863e-96	0.307298	0.494	0.186	1.00903e-91	DC	BCL3
RHOG2	9.58722e-96	0.439439	0.779	0.383	3.21536e-91	DC	RHOG
EZR1	1.56438e-95	0.564195	0.853	0.482	5.24662e-91	DC	EZR
TIPARP1	5.53241e-95	0.4721	0.676	0.312	1.85546e-90	DC	TIPARP
ARL4C1	9.00155e-95	0.537292	0.846	0.439	3.01894e-90	DC	ARL4C
REPIN1	1.13843e-94	0.259293	0.3	0.089	3.81807e-90	DC	REPIN1
EVI2B1	1.1591e-94	0.343137	0.753	0.338	3.88739e-90	DC	EVI2B
NCF11	2.54151e-94	0.33418	0.508	0.194	8.52372e-90	DC	NCF1
UBE2J1	3.21975e-94	0.420114	0.561	0.234	1.07984e-89	DC	UBE2J1
RBPJ1	7.58454e-94	0.465838	0.726	0.354	2.5437e-89	DC	RBPJ
CLNS1A	7.72072e-94	0.379568	0.677	0.31	2.58938e-89	DC	CLNS1A
CCDC112	1.87799e-93	0.306242	0.383	0.132	6.29842e-89	DC	CCDC112
AXL	5.29058e-93	0.457248	0.373	0.128	1.77435e-88	DC	AXL
ARPC2	1.14228e-92	0.521063	0.978	0.82	3.83098e-88	DC	ARPC2
PPA2	3.86292e-92	0.257643	0.453	0.166	1.29555e-87	DC	PPA2
CYB561A3	5.5093e-92	0.538788	0.292	0.09	1.84771e-87	DC	CYB561A3
ATG101	9.37017e-92	0.416109	0.531	0.222	3.14257e-87	DC	ATG101
FCGR1A	1.38984e-91	0.342795	0.381	0.129	4.66125e-87	DC	FCGR1A
STK38L	3.80129e-91	0.278555	0.436	0.16	1.27488e-86	DC	STK38L
NANS	4.07658e-91	0.382734	0.654	0.299	1.3672e-86	DC	NANS
ALOX5AP3	3.04664e-90	0.735748	0.675	0.332	1.02178e-85	DC	ALOX5AP
MFSD12	4.9534e-90	0.251155	0.389	0.135	1.66127e-85	DC	MFSD12
ERCC1	1.82108e-89	0.317932	0.542	0.224	6.10753e-85	DC	ERCC1
FOXN2	2.33009e-89	0.263747	0.48	0.183	7.81467e-85	DC	FOXN2
GPR652	2.84795e-89	0.264821	0.56	0.222	9.55147e-85	DC	GPR65
TALDO11	1.00657e-88	0.457582	0.844	0.476	3.37582e-84	DC	TALDO1
ACTR21	1.03644e-88	0.486318	0.896	0.546	3.47602e-84	DC	ACTR2
BLOC1S61	2.7747e-88	0.288114	0.556	0.232	9.3058e-84	DC	BLOC1S6
EIF3L	3.37245e-88	0.488977	0.821	0.471	1.13105e-83	DC	EIF3L
KDM6B1	4.98049e-88	0.286514	0.491	0.193	1.67036e-83	DC	KDM6B
PRELID1	5.49867e-88	0.562175	0.89	0.562	1.84414e-83	DC	PRELID1
SNHG151	1.09268e-87	0.348984	0.61	0.266	3.66462e-83	DC	SNHG15
GALK1	1.23176e-87	0.252011	0.404	0.146	4.13109e-83	DC	GALK1
MTHFD2	3.1722e-87	0.33157	0.564	0.239	1.06389e-82	DC	MTHFD2
VPS35	1.20105e-86	0.381344	0.725	0.356	4.02807e-82	DC	VPS35
CD532	1.35069e-86	0.380238	0.866	0.425	4.52994e-82	DC	CD53
PILRA	2.5273e-86	0.296234	0.398	0.141	8.47605e-82	DC	PILRA
TRMT6	3.3264e-86	0.292233	0.35	0.118	1.11561e-81	DC	TRMT6
PARL	4.12111e-86	0.268949	0.487	0.192	1.38214e-81	DC	PARL
RILPL21	4.20437e-86	0.489639	0.782	0.424	1.41006e-81	DC	RILPL2
GNA13	4.35506e-86	0.257107	0.44	0.164	1.4606e-81	DC	GNA13
MKNK2	1.72521e-85	0.282573	0.519	0.21	5.786e-81	DC	MKNK2
LACTB1	1.88725e-85	0.328919	0.588	0.256	6.32947e-81	DC	LACTB
PIM3	2.03313e-85	0.507874	0.794	0.426	6.8187e-81	DC	PIM3
PFKFB3	2.06324e-85	0.275419	0.395	0.141	6.91971e-81	DC	PFKFB3
LAMTOR2	2.09188e-85	0.409787	0.708	0.346	7.01574e-81	DC	LAMTOR2
NPC2	5.30533e-85	0.514347	0.947	0.561	1.7793e-80	DC	NPC2
IFT20	3.25318e-84	0.295686	0.495	0.202	1.09105e-79	DC	IFT20
LILRB2	4.8266e-84	0.286068	0.3	0.094	1.61875e-79	DC	LILRB2
LAMTOR1	5.15331e-84	0.463435	0.847	0.469	1.72832e-79	DC	LAMTOR1
MGAT11	6.71291e-84	0.405102	0.662	0.315	2.25138e-79	DC	MGAT1
CFL1	1.93246e-83	0.482485	0.976	0.881	6.48107e-79	DC	CFL1
IDH3A	3.43321e-83	0.300421	0.308	0.1	1.15143e-78	DC	IDH3A
ETS21	6.79066e-83	0.58127	0.671	0.344	2.27745e-78	DC	ETS2
PEA15	8.2799e-83	0.409156	0.575	0.261	2.77691e-78	DC	PEA15
DNAJB11	1.18339e-82	0.269215	0.456	0.179	3.96884e-78	DC	DNAJB11
TSEN341	1.43491e-82	0.343614	0.56	0.247	4.81241e-78	DC	TSEN34
EEF1B21	1.59183e-82	0.48066	0.978	0.876	5.33869e-78	DC	EEF1B2
DYNC1LI11	2.94476e-82	0.328854	0.593	0.267	9.87613e-78	DC	DYNC1LI1
TCTN3	8.03559e-82	0.330064	0.285	0.09	2.69498e-77	DC	TCTN3
NUDT22	1.2967e-81	0.285777	0.444	0.174	4.34886e-77	DC	NUDT22
FCN1	1.64685e-81	0.411417	0.297	0.095	5.5232e-77	DC	FCN1
B4GALT1	1.87599e-81	0.413255	0.61	0.279	6.29169e-77	DC	B4GALT1
UBA521	3.19033e-81	0.388707	0.987	0.923	1.06997e-76	DC	UBA52
JMJD1C	5.25133e-81	0.475671	0.802	0.443	1.76119e-76	DC	JMJD1C
RPL231	5.27917e-81	0.526619	0.975	0.858	1.77053e-76	DC	RPL23
ELMSAN1	6.14167e-81	0.292531	0.458	0.183	2.05979e-76	DC	ELMSAN1
TAF101	1.71442e-80	0.42957	0.817	0.457	5.74982e-76	DC	TAF10
ATP6V1B2	2.43599e-80	0.285272	0.45	0.179	8.16982e-76	DC	ATP6V1B2
TMSB4X1	2.90397e-80	0.544441	0.994	0.974	9.73934e-76	DC	TMSB4X
ATP6AP1	2.96614e-80	0.338324	0.586	0.262	9.94783e-76	DC	ATP6AP1
PPP1R14B	3.4227e-80	1.02056	0.812	0.47	1.14791e-75	DC	PPP1R14B
EIF4EBP1	4.29684e-80	0.277136	0.537	0.227	1.44108e-75	DC	EIF4EBP1
RNH1	1.08628e-79	0.514089	0.866	0.526	3.64315e-75	DC	RNH1
RAB8A	1.00184e-78	0.313055	0.656	0.312	3.35996e-74	DC	RAB8A
CD302	2.23568e-78	0.280376	0.495	0.205	7.49802e-74	DC	CD302
GNAI2	3.70799e-78	0.494038	0.926	0.648	1.24359e-73	DC	GNAI2
GPATCH11	6.7541e-78	0.294908	0.399	0.153	2.26519e-73	DC	GPATCH11
MAP3K13	3.02852e-77	0.284734	0.458	0.186	1.01571e-72	DC	MAP3K13
TNFRSF1B	6.06869e-77	0.331464	0.602	0.274	2.03532e-72	DC	TNFRSF1B
CBX6	7.23707e-77	0.365741	0.519	0.225	2.42717e-72	DC	CBX6
IFNGR21	1.43419e-76	0.296878	0.567	0.25	4.81e-72	DC	IFNGR2
HMGN12	4.58256e-76	0.464683	0.909	0.595	1.5369e-71	DC	HMGN1
VMA21	1.51602e-75	0.253737	0.503	0.211	5.08442e-71	DC	VMA21
AKIRIN21	5.07881e-75	0.302559	0.581	0.266	1.70333e-70	DC	AKIRIN2
PDCL3	6.0467e-75	0.368721	0.553	0.249	2.02794e-70	DC	PDCL3
ENTPD1	1.43766e-74	0.277452	0.337	0.12	4.82161e-70	DC	ENTPD1
THBD1	1.84926e-74	0.465353	0.553	0.257	6.20205e-70	DC	THBD
MTPN	5.57107e-74	0.388968	0.866	0.493	1.86843e-69	DC	MTPN
RPS132	7.87878e-74	0.417874	0.993	0.948	2.64238e-69	DC	RPS13
FKBP52	1.0278e-73	0.29523	0.624	0.294	3.44703e-69	DC	FKBP5
CREM3	2.40999e-73	0.484516	0.707	0.379	8.08261e-69	DC	CREM
PFN11	3.87192e-73	0.451092	0.984	0.893	1.29856e-68	DC	PFN1
GRSF1	5.93929e-73	0.293856	0.438	0.181	1.99192e-68	DC	GRSF1
SEC61B1	1.02469e-72	0.796187	0.941	0.673	3.4366e-68	DC	SEC61B
TUBA1A1	1.38421e-72	0.785157	0.866	0.638	4.64237e-68	DC	TUBA1A
TPM3	3.02723e-72	0.490036	0.956	0.706	1.01527e-67	DC	TPM3
PLIN3	3.82992e-72	0.285872	0.537	0.241	1.28448e-67	DC	PLIN3
CARD161	5.3997e-72	0.357621	0.619	0.303	1.81095e-67	DC	CARD16
MOB1A1	1.30908e-71	0.338438	0.762	0.402	4.39041e-67	DC	MOB1A
CASP1	2.27428e-71	0.333912	0.525	0.238	7.62746e-67	DC	CASP1
JDP2	4.05242e-71	0.309359	0.409	0.166	1.3591e-66	DC	JDP2
RPS22	5.00233e-71	0.394775	0.998	0.959	1.67768e-66	DC	RPS2
CORO1C	7.03767e-71	0.319719	0.352	0.134	2.36029e-66	DC	CORO1C
PPIA	1.66326e-70	0.439876	0.971	0.843	5.57824e-66	DC	PPIA
SOX41	3.22678e-70	0.843302	0.473	0.217	1.0822e-65	DC	SOX4
G0S21	9.46042e-70	0.680175	0.28	0.097	3.17283e-65	DC	G0S2
FCHSD2	1.27695e-69	0.375164	0.378	0.151	4.28264e-65	DC	FCHSD2
NDUFB5	3.03347e-69	0.333195	0.735	0.385	1.01737e-64	DC	NDUFB5
GNG51	1.08312e-68	0.438818	0.934	0.65	3.63257e-64	DC	GNG5
OLR1	1.31716e-68	0.376866	0.299	0.106	4.41748e-64	DC	OLR1
SSR1	3.52079e-68	0.286967	0.602	0.289	1.1808e-63	DC	SSR1
YWHAH	4.94463e-68	0.604734	0.766	0.443	1.65833e-63	DC	YWHAH
MAPKAPK2	5.25317e-68	0.297742	0.372	0.146	1.76181e-63	DC	MAPKAPK2
GLRX	2.70055e-67	0.321273	0.713	0.364	9.05711e-63	DC	GLRX
CELF21	2.84967e-67	0.278236	0.638	0.305	9.55721e-63	DC	CELF2
CHD1	4.47552e-67	0.273073	0.7	0.36	1.501e-62	DC	CHD1
BAZ1A1	2.12112e-66	0.254043	0.639	0.308	7.11383e-62	DC	BAZ1A
ACTR31	2.9987e-66	0.434958	0.838	0.529	1.0057e-61	DC	ACTR3
OSTF1	4.47052e-66	0.304007	0.771	0.404	1.49932e-61	DC	OSTF1
SUB12	5.19375e-66	0.449717	0.938	0.724	1.74188e-61	DC	SUB1
GTF2B2	1.15446e-65	0.311015	0.729	0.39	3.87183e-61	DC	GTF2B
MARCKSL1	1.2866e-65	0.639895	0.544	0.248	4.31499e-61	DC	MARCKSL1
C1QBP	3.3884e-65	0.381231	0.741	0.414	1.1364e-60	DC	C1QBP
LAPTM51	4.36596e-65	0.397591	0.912	0.508	1.46426e-60	DC	LAPTM5
ZNF331	4.99788e-65	0.426952	0.691	0.368	1.67619e-60	DC	ZNF331
ATP5MC3	6.65672e-65	0.448653	0.897	0.613	2.23253e-60	DC	ATP5MC3
NECTIN2	6.71595e-65	0.292832	0.426	0.183	2.2524e-60	DC	NECTIN2
SELL	1.05702e-64	0.267379	0.344	0.13	3.54503e-60	DC	SELL
HIGD2A1	1.30281e-64	0.408892	0.883	0.582	4.36938e-60	DC	HIGD2A
OSTC	1.8091e-64	0.396456	0.799	0.452	6.06737e-60	DC	OSTC
PFDN2	1.88886e-64	0.346378	0.808	0.459	6.33485e-60	DC	PFDN2
CAP11	2.20707e-64	0.416555	0.856	0.556	7.40206e-60	DC	CAP1
H2AFV2	1.3898e-63	0.295446	0.84	0.481	4.6611e-59	DC	H2AFV
MTDH1	1.50058e-63	0.441244	0.919	0.624	5.03263e-59	DC	MTDH
ARPC41	1.55287e-63	0.354339	0.804	0.45	5.20803e-59	DC	ARPC4
RPS161	2.44161e-63	0.355868	0.987	0.931	8.18868e-59	DC	RPS16
ATP5MF	5.70776e-63	0.393821	0.809	0.486	1.91427e-58	DC	ATP5MF
SRGAP2	7.25763e-63	0.271439	0.309	0.116	2.43406e-58	DC	SRGAP2
PICALM	1.11777e-62	0.261308	0.479	0.215	3.74877e-58	DC	PICALM
PHB	1.7171e-62	0.39079	0.675	0.35	5.75881e-58	DC	PHB
TUBA1B	2.14564e-62	0.501132	0.954	0.763	7.19604e-58	DC	TUBA1B
CYCS1	2.17953e-62	0.548058	0.84	0.539	7.30969e-58	DC	CYCS
ARPC5	2.19327e-62	0.410249	0.931	0.671	7.35577e-58	DC	ARPC5
MCUR1	2.90972e-62	0.254887	0.454	0.203	9.75861e-58	DC	MCUR1
ARF5	6.98877e-62	0.311352	0.704	0.374	2.34389e-57	DC	ARF5
POMP1	8.65523e-62	0.408728	0.9	0.59	2.90279e-57	DC	POMP
ATP5F1A	5.80275e-61	0.379072	0.774	0.46	1.94613e-56	DC	ATP5F1A
ATP5PB	7.27751e-61	0.330469	0.766	0.436	2.44073e-56	DC	ATP5PB
EIF3M	1.58058e-60	0.329576	0.795	0.46	5.30094e-56	DC	EIF3M
SNX3	2.04221e-60	0.858265	0.889	0.592	6.84917e-56	DC	SNX3
SUMO3	2.3303e-60	0.279764	0.677	0.343	7.81535e-56	DC	SUMO3
NDUFV2	2.39186e-60	0.393403	0.851	0.547	8.02183e-56	DC	NDUFV2
RTN41	2.81618e-60	0.382362	0.866	0.525	9.4449e-56	DC	RTN4
ATF3	3.93518e-60	0.384507	0.722	0.389	1.31978e-55	DC	ATF3
MLEC1	4.79576e-60	0.299482	0.639	0.331	1.6084e-55	DC	MLEC
UBE2R21	1.4313e-59	0.266904	0.626	0.315	4.80028e-55	DC	UBE2R2
IER5	1.5739e-59	0.457473	0.565	0.278	5.27854e-55	DC	IER5
SLC25A6	1.05685e-58	0.50208	0.94	0.784	3.54447e-54	DC	SLC25A6
TOP11	3.27339e-58	0.347931	0.749	0.431	1.09783e-53	DC	TOP1
RPLP01	4.72947e-58	0.382703	0.99	0.92	1.58617e-53	DC	RPLP0
TMEM14C	1.25984e-57	0.387901	0.822	0.471	4.22525e-53	DC	TMEM14C
PHLDA21	3.93907e-57	0.350366	0.367	0.156	1.32108e-52	DC	PHLDA2
VSIR	8.22044e-57	0.25369	0.618	0.312	2.75697e-52	DC	VSIR
MAFF	2.7995e-56	0.328139	0.473	0.226	9.38897e-52	DC	MAFF
ATP5F1B	2.88683e-56	0.360188	0.825	0.514	9.68185e-52	DC	ATP5F1B
C1orf54	4.04483e-56	0.680108	0.404	0.188	1.35656e-51	DC	C1orf54
COX4I1	4.24018e-56	0.357937	0.972	0.856	1.42207e-51	DC	COX4I1
ATP5F1E	4.30775e-56	0.333294	0.973	0.901	1.44473e-51	DC	ATP5F1E
2023-03-02	6.51112e-56	0.276073	0.572	0.284	2.1837e-51	DC	2023-03-02
CCT8	3.63895e-55	0.277478	0.733	0.411	1.22043e-50	DC	CCT8
EIF3K1	6.04496e-55	0.394782	0.943	0.775	2.02736e-50	DC	EIF3K
APPL1	6.49952e-55	0.259442	0.648	0.339	2.17981e-50	DC	APPL1
VPS29	6.83848e-55	0.320516	0.794	0.467	2.29349e-50	DC	VPS29
TUFM	2.04664e-53	0.270889	0.77	0.435	6.86401e-49	DC	TUFM
PSMA4	2.90759e-53	0.259492	0.735	0.414	9.75147e-49	DC	PSMA4
UBC	4.52886e-53	0.394059	0.987	0.938	1.51889e-48	DC	UBC
UBE2L3	5.43552e-53	0.253919	0.773	0.435	1.82296e-48	DC	UBE2L3
RAB5C	4.732e-52	0.252573	0.778	0.427	1.58702e-47	DC	RAB5C
RAB7A	1.93579e-51	0.283165	0.757	0.434	6.49225e-47	DC	RAB7A
SH3BGRL	2.54495e-51	0.353013	0.91	0.605	8.53526e-47	DC	SH3BGRL
SLC20A1	3.07728e-51	0.291225	0.39	0.176	1.03206e-46	DC	SLC20A1
TMEM1231	3.40359e-51	0.275885	0.729	0.414	1.1415e-46	DC	TMEM123
CALR	5.59598e-51	0.531481	0.907	0.668	1.87678e-46	DC	CALR
ATP5F1C1	1.17373e-50	0.333404	0.85	0.528	3.93644e-46	DC	ATP5F1C
RAC1	2.67721e-50	0.390666	0.944	0.691	8.97881e-46	DC	RAC1
NAP1L11	3.13367e-50	0.383409	0.885	0.627	1.05097e-45	DC	NAP1L1
HSPH11	8.24242e-50	0.26949	0.503	0.252	2.76434e-45	DC	HSPH1
ERN1	9.11096e-50	0.286138	0.347	0.149	3.05563e-45	DC	ERN1
IER31	1.09359e-49	0.639009	0.653	0.407	3.6677e-45	DC	IER3
HADHA	8.76095e-49	0.275119	0.801	0.47	2.93825e-44	DC	HADHA
RPS231	1.78271e-48	0.322092	1	0.962	5.97886e-44	DC	RPS23
GMFG2	2.7763e-48	0.254643	0.874	0.535	9.31117e-44	DC	GMFG
ATP5MG	3.0933e-48	0.34277	0.948	0.79	1.03743e-43	DC	ATP5MG
HSPD1	6.11281e-48	0.339112	0.854	0.561	2.05011e-43	DC	HSPD1
PSME2	1.04035e-47	0.442843	0.85	0.577	3.48911e-43	DC	PSME2
RPL42	1.12945e-47	0.344664	0.955	0.794	3.78795e-43	DC	RPL4
JPT12	1.69984e-47	0.269565	0.674	0.374	5.70092e-43	DC	JPT1
MCL13	1.96149e-47	0.257647	0.909	0.621	6.57846e-43	DC	MCL1
NR4A22	2.60307e-47	0.345398	0.706	0.415	8.73017e-43	DC	NR4A2
USF2	2.64579e-47	0.251949	0.625	0.334	8.87345e-43	DC	USF2
RPL271	5.0433e-47	0.331232	0.966	0.875	1.69142e-42	DC	RPL27
BAG1	3.3941e-46	0.253448	0.65	0.361	1.13831e-41	DC	BAG1
LRRFIP1	4.40621e-46	0.35804	0.928	0.65	1.47776e-41	DC	LRRFIP1
ANKRD111	1.89406e-45	0.430716	0.642	0.373	6.35229e-41	DC	ANKRD11
RPL27A2	4.1041e-45	0.364387	0.971	0.871	1.37643e-40	DC	RPL27A
RACK1	5.95456e-45	0.290624	0.986	0.935	1.99704e-40	DC	RACK1
HIVEP1	2.69301e-44	0.263275	0.274	0.114	9.03182e-40	DC	HIVEP1
GABARAPL2	7.71921e-44	0.351953	0.878	0.585	2.58887e-39	DC	GABARAPL2
RPL262	2.74401e-43	0.285232	0.984	0.94	9.20286e-39	DC	RPL26
CLIC11	2.90046e-43	0.331357	0.966	0.825	9.72757e-39	DC	CLIC1
CCL3L1	2.09567e-42	0.560302	0.303	0.135	7.02846e-38	DC	CCL3L1
SELENOK1	3.93992e-42	0.717357	0.85	0.628	1.32137e-37	DC	SELENOK
PSMB3	6.20413e-42	0.301978	0.867	0.571	2.08074e-37	DC	PSMB3
ZFAND51	6.55945e-42	0.457909	0.701	0.431	2.19991e-37	DC	ZFAND5
SEC11A1	1.00459e-41	0.309234	0.86	0.569	3.36919e-37	DC	SEC11A
LIMS1	1.64576e-41	0.318201	0.692	0.416	5.51956e-37	DC	LIMS1
AKAP133	1.9976e-41	0.304262	0.796	0.509	6.69955e-37	DC	AKAP13
CEBPB1	5.59614e-41	0.428418	0.715	0.476	1.87683e-36	DC	CEBPB
SRSF9	6.19852e-41	0.267465	0.843	0.553	2.07886e-36	DC	SRSF9
RPL18A1	7.43487e-41	0.273075	0.987	0.951	2.49351e-36	DC	RPL18A
COPE	6.19676e-40	0.262176	0.837	0.547	2.07827e-35	DC	COPE
NACA1	6.67754e-40	0.299829	0.988	0.933	2.23951e-35	DC	NACA
ATP5MC21	2.17995e-39	0.333862	0.955	0.811	7.31113e-35	DC	ATP5MC2
COX7B	1.02219e-38	0.255634	0.867	0.579	3.42821e-34	DC	COX7B
ITM2C1	2.55457e-38	0.591004	0.403	0.205	8.56751e-34	DC	ITM2C
CPNE3	4.52669e-37	0.589027	0.571	0.334	1.51816e-32	DC	CPNE3
HINT11	7.04111e-37	0.337084	0.942	0.8	2.36145e-32	DC	HINT1
RPS81	7.83608e-36	0.260849	0.995	0.966	2.62806e-31	DC	RPS8
EIF3H	1.03536e-35	0.263504	0.885	0.638	3.47239e-31	DC	EIF3H
HSPA51	4.13016e-35	0.426383	0.874	0.625	1.38517e-30	DC	HSPA5
ZNF706	1.19467e-34	0.266679	0.807	0.521	4.0067e-30	DC	ZNF706
ERP29	2.06413e-33	0.432966	0.855	0.6	6.92268e-29	DC	ERP29
SLC25A3	2.96179e-33	0.32987	0.89	0.692	9.93326e-29	DC	SLC25A3
PDIA31	8.14609e-33	0.349714	0.91	0.675	2.73203e-28	DC	PDIA3
GNAS	1.11995e-32	0.258277	0.976	0.858	3.7561e-28	DC	GNAS
ANXA5	2.27283e-31	0.290692	0.844	0.614	7.62261e-27	DC	ANXA5
PARK7	7.3279e-30	0.294208	0.896	0.65	2.45763e-25	DC	PARK7
CD2AP	4.92174e-26	0.252784	0.291	0.154	1.65065e-21	DC	CD2AP
CD40	1.84983e-25	0.257661	0.322	0.177	6.20395e-21	DC	CD40
S100A10	2.7317e-24	0.299423	0.919	0.831	9.16159e-20	DC	S100A10
HSP90B11	5.72057e-19	0.321846	0.933	0.715	1.91857e-14	DC	HSP90B1
SPCS11	7.50542e-17	0.382712	0.875	0.648	2.51717e-12	DC	SPCS1
TCF4	2.36971e-16	0.395079	0.463	0.305	7.94753e-12	DC	TCF4
TXN2	8.28778e-15	0.657145	0.846	0.654	2.77955e-10	DC	TXN
SELENOS1	2.55022e-11	0.316058	0.635	0.457	8.55294e-07	DC	SELENOS
BIRC33	9.18743e-07	0.321078	0.448	0.312	0.0308128	DC	BIRC3
HSPA1A	7.31654e-05	0.379925	0.686	0.572	1	DC	HSPA1A
ACKR1	0	4.1581	0.57	0.01	0	Endothelial	ACKR1
RAMP2	0	3.58606	0.925	0.04	0	Endothelial	RAMP2
IFI27	0	3.57115	0.936	0.082	0	Endothelial	IFI27
VWF	0	3.16785	0.818	0.013	0	Endothelial	VWF
IGFBP4	0	2.88149	0.912	0.163	0	Endothelial	IGFBP4
GNG11	0	2.78956	0.802	0.141	0	Endothelial	GNG11
TM4SF1	0	2.76876	0.902	0.145	0	Endothelial	TM4SF1
CALCRL	0	2.74859	0.881	0.071	0	Endothelial	CALCRL
PECAM1	0	2.73407	0.92	0.106	0	Endothelial	PECAM1
ID1	0	2.72602	0.818	0.096	0	Endothelial	ID1
CLEC14A	0	2.69723	0.873	0.012	0	Endothelial	CLEC14A
PLVAP	0	2.68014	0.8	0.013	0	Endothelial	PLVAP
EDN1	0	2.6687	0.344	0.016	0	Endothelial	EDN1
RAMP3	0	2.60529	0.722	0.016	0	Endothelial	RAMP3
ECSCR	0	2.5919	0.875	0.01	0	Endothelial	ECSCR
SOX18	0	2.57028	0.778	0.011	0	Endothelial	SOX18
SLC9A3R2	0	2.54499	0.776	0.092	0	Endothelial	SLC9A3R2
NPDC1	0	2.50764	0.908	0.142	0	Endothelial	NPDC1
CLDN5	0	2.31578	0.548	0.006	0	Endothelial	CLDN5
HYAL2	0	2.30751	0.757	0.062	0	Endothelial	HYAL2
CLU	0	2.30193	0.816	0.27	0	Endothelial	CLU
PALMD	0	2.29171	0.826	0.021	0	Endothelial	PALMD
CAV1	0	2.27842	0.916	0.214	0	Endothelial	CAV1
EGFL7	0	2.27823	0.825	0.043	0	Endothelial	EGFL7
AQP1	0	2.23488	0.795	0.124	0	Endothelial	AQP1
STC1	0	2.20027	0.401	0.003	0	Endothelial	STC1
SPARCL1	0	2.15646	0.908	0.261	0	Endothelial	SPARCL1
HSPG2	0	2.1426	0.797	0.083	0	Endothelial	HSPG2
SPRY1	0	2.13608	0.654	0.113	0	Endothelial	SPRY1
PDLIM1	0	2.11679	0.849	0.2	0	Endothelial	PDLIM1
IFITM3	0	2.10151	0.981	0.479	0	Endothelial	IFITM3
RBP7	0	2.01194	0.611	0.055	0	Endothelial	RBP7
C2CD4B	0	1.98461	0.363	0.004	0	Endothelial	C2CD4B
CAVIN21	0	1.97335	0.692	0.041	0	Endothelial	CAVIN2
EMCN	0	1.96893	0.652	0.009	0	Endothelial	EMCN
ADGRL4	0	1.92739	0.723	0.008	0	Endothelial	ADGRL4
MTUS1	0	1.90663	0.745	0.091	0	Endothelial	MTUS1
[truncated: 3,371 more rows]
