# Supplementary material for: Integrating the characteristic genes of macrophage pseudotime analysis in single-cell RNA-seq to construct a prediction model of atherosclerosis
Source: Aging (Albany NY). 2023 Jul 8;15(13):6361–79. doi: 10.18632/aging.204856 (PMC10373969; doi:10.18632/aging.204856)
Supplement: Supplementary Table 3 [file aging-15-204856-s003.xlsx]

## Sheet: Sheet1
Supplementary Table 3. Marker genes of 3 cell clusters of macrophages.
	p_val	avg_log2FC	pct.1	pct.2	p_val_adj	cluster	gene
S100A8	0	3.28934	0.622	0.217	0	M1	S100A8
FCN1	0	2.49652	0.706	0.169	0	M1	FCN1
TIMP1	0	2.31373	0.933	0.758	0	M1	TIMP1
VCAN	0	2.29757	0.783	0.263	0	M1	VCAN
EREG	0	1.71189	0.472	0.107	0	M1	EREG
CD52	0	1.49944	0.7	0.267	0	M1	CD52
S100A10	0	1.36649	0.974	0.907	0	M1	S100A10
SH3BGRL3	0	1.29768	0.984	0.951	0	M1	SH3BGRL3
MARCO	0	1.29483	0.598	0.194	0	M1	MARCO
S100A6	0	1.28346	0.986	0.889	0	M1	S100A6
GAPDH	0	1.27067	0.988	0.974	0	M1	GAPDH
SLC11A1	0	1.24484	0.74	0.309	0	M1	SLC11A1
SMIM25	0	1.15516	0.648	0.221	0	M1	SMIM25
ENO1	0	1.12649	0.906	0.781	0	M1	ENO1
FLNA	0	1.01703	0.697	0.287	0	M1	FLNA
LSP1	0	0.961231	0.837	0.503	0	M1	LSP1
ANPEP	0	0.952478	0.556	0.165	0	M1	ANPEP
EMP3	0	0.94694	0.938	0.797	0	M1	EMP3
GLIPR2	0	0.924752	0.72	0.385	0	M1	GLIPR2
PKM	0	0.901232	0.883	0.735	0	M1	PKM
AQP9	0	0.826685	0.44	0.087	0	M1	AQP9
S100A11	0	0.721427	0.983	0.976	0	M1	S100A11
FBP1	1.95277e-301	1.62709	0.671	0.375	6.5492e-297	M1	FBP1
GSTO1	2.80981e-301	0.834172	0.895	0.777	9.42353e-297	M1	GSTO1
SERF2	1.382e-296	0.545535	0.988	0.975	4.63494e-292	M1	SERF2
TSPO	2.85505e-281	0.669685	0.939	0.886	9.57527e-277	M1	TSPO
CD36	4.64795e-272	1.38902	0.741	0.43	1.55883e-267	M1	CD36
PGAM1	6.50187e-264	0.80947	0.798	0.615	2.1806e-259	M1	PGAM1
TPI1	1.96057e-263	1.01483	0.924	0.876	6.57535e-259	M1	TPI1
BCL2A1	1.86381e-261	1.00641	0.822	0.592	6.25086e-257	M1	BCL2A1
OAZ1	6.43142e-247	0.399968	0.976	0.971	2.15697e-242	M1	OAZ1
IL1RN	1.54843e-243	1.43468	0.684	0.384	5.19313e-239	M1	IL1RN
FGR	5.7891e-241	0.753559	0.512	0.209	1.94155e-236	M1	FGR
VIM	2.32536e-236	0.904358	0.992	0.968	7.7988e-232	M1	VIM
FTH1	3.24639e-235	0.689969	1	1	1.08877e-230	M1	FTH1
LGALS1	1.21088e-234	0.862563	0.959	0.842	4.06105e-230	M1	LGALS1
S100A4	1.08908e-233	0.818384	0.962	0.902	3.65256e-229	M1	S100A4
PGK1	5.37302e-232	0.938567	0.898	0.843	1.802e-227	M1	PGK1
TREM1	9.58356e-232	0.841589	0.618	0.325	3.21413e-227	M1	TREM1
G0S2	3.37355e-228	2.17163	0.391	0.107	1.13142e-223	M1	G0S2
C15orf48	3.9596e-224	1.54866	0.62	0.349	1.32797e-219	M1	C15orf48
COTL1	1.16249e-214	0.839088	0.894	0.823	3.89877e-210	M1	COTL1
UPP1	8.30776e-214	0.712809	0.686	0.427	2.78626e-209	M1	UPP1
EFHD2	7.88629e-208	0.59805	0.901	0.79	2.6449e-203	M1	EFHD2
S100A12	2.02688e-206	1.70632	0.256	0.029	6.79774e-202	M1	S100A12
MIF	3.65087e-204	0.937186	0.749	0.575	1.22443e-199	M1	MIF
SPP1	3.94599e-202	2.1554	0.619	0.396	1.32341e-197	M1	SPP1
MGST1	1.46173e-200	0.651139	0.337	0.084	4.90236e-196	M1	MGST1
MCEMP1	1.69538e-196	0.698745	0.272	0.043	5.68595e-192	M1	MCEMP1
GNG5	2.95738e-195	0.52165	0.931	0.886	9.91847e-191	M1	GNG5
TYMP	6.24852e-195	0.540637	0.958	0.896	2.09563e-190	M1	TYMP
SLAMF9	1.99385e-191	0.808902	0.316	0.074	6.68697e-187	M1	SLAMF9
FN1	2.56483e-186	1.73319	0.489	0.228	8.60192e-182	M1	FN1
LDHA	1.53141e-184	0.815137	0.887	0.823	5.13603e-180	M1	LDHA
H2AFY	6.41594e-183	0.600328	0.88	0.803	2.15178e-178	M1	H2AFY
NEAT1	2.85135e-175	0.659154	0.991	0.94	9.56285e-171	M1	NEAT1
CLIC1	5.23538e-174	0.467957	0.955	0.942	1.75584e-169	M1	CLIC1
CSTB	1.13399e-173	1.64436	0.937	0.896	3.80319e-169	M1	CSTB
STXBP2	3.30358e-173	0.76185	0.642	0.433	1.10795e-168	M1	STXBP2
ACTB	6.50728e-170	0.485013	0.995	0.995	2.18241e-165	M1	ACTB
PLP2	3.10009e-167	0.670757	0.594	0.353	1.03971e-162	M1	PLP2
LYZ	4.63891e-167	1.14181	0.955	0.913	1.5558e-162	M1	LYZ
CFP	1.76531e-165	0.764165	0.301	0.081	5.92049e-161	M1	CFP
MYL6	4.533e-164	0.463385	0.981	0.97	1.52028e-159	M1	MYL6
S100A9	1.17757e-163	2.32261	0.77	0.605	3.94933e-159	M1	S100A9
CSTA	1.47621e-161	0.812089	0.596	0.38	4.9509e-157	M1	CSTA
APLP2	4.41235e-159	0.580594	0.872	0.763	1.47981e-154	M1	APLP2
CYP27A1	1.36044e-156	0.638896	0.403	0.163	4.56264e-152	M1	CYP27A1
PFN1	7.46776e-152	0.382	0.97	0.963	2.50454e-147	M1	PFN1
PPIF	1.02678e-151	0.804121	0.606	0.391	3.44363e-147	M1	PPIF
LILRA2	7.75833e-151	0.514065	0.367	0.142	2.60199e-146	M1	LILRA2
CD44	1.18528e-150	0.556542	0.873	0.734	3.97519e-146	M1	CD44
CD300E	3.12353e-149	0.547963	0.265	0.064	1.04757e-144	M1	CD300E
ERO1A	7.71389e-149	0.713246	0.505	0.283	2.58708e-144	M1	ERO1A
SLC25A37	4.35753e-147	0.829583	0.518	0.301	1.46143e-142	M1	SLC25A37
RPL8	3.07324e-139	0.349079	0.978	0.973	1.0307e-134	M1	RPL8
PLIN2	9.39116e-139	0.8501	0.851	0.73	3.14961e-134	M1	PLIN2
LCP1	1.50125e-134	0.500226	0.89	0.803	5.03489e-130	M1	LCP1
NOP10	7.21727e-133	0.475704	0.859	0.779	2.42053e-128	M1	NOP10
NCF2	3.9817e-130	0.567181	0.681	0.51	1.33538e-125	M1	NCF2
LIMS1	1.5095e-129	0.541177	0.795	0.675	5.06256e-125	M1	LIMS1
FABP5	9.34492e-129	1.70582	0.764	0.704	3.1341e-124	M1	FABP5
SEC61G	1.02583e-127	0.553255	0.787	0.693	3.44041e-123	M1	SEC61G
C4orf3	1.37988e-126	0.548741	0.839	0.755	4.62783e-122	M1	C4orf3
ELOB	6.76739e-126	0.385309	0.906	0.849	2.26965e-121	M1	ELOB
BTG1	2.06097e-125	0.661851	0.964	0.911	6.9121e-121	M1	BTG1
GPCPD1	1.66944e-123	0.57085	0.597	0.403	5.59898e-119	M1	GPCPD1
PFDN5	6.28142e-123	0.310948	0.968	0.949	2.10666e-118	M1	PFDN5
ITGAX	2.39839e-120	0.552894	0.627	0.424	8.04372e-116	M1	ITGAX
NFKBIA	9.1581e-120	0.910489	0.946	0.892	3.07144e-115	M1	NFKBIA
NRGN	9.71346e-120	0.368482	0.262	0.08	3.2577e-115	M1	NRGN
PHLDA1	3.48753e-117	0.872143	0.567	0.382	1.16965e-112	M1	PHLDA1
CD109	4.94965e-117	0.495779	0.323	0.132	1.66001e-112	M1	CD109
LTA4H	6.57771e-116	0.572063	0.523	0.336	2.20603e-111	M1	LTA4H
SIRPB1	6.30433e-115	0.357827	0.272	0.093	2.11435e-110	M1	SIRPB1
PLAUR	3.71092e-113	0.698536	0.908	0.826	1.24457e-108	M1	PLAUR
CXXC5	3.511e-110	0.438583	0.373	0.179	1.17752e-105	M1	CXXC5
ATP6V1F	1.61915e-109	0.478082	0.904	0.854	5.43032e-105	M1	ATP6V1F
PPDPF	8.05477e-109	0.475807	0.731	0.59	2.70141e-104	M1	PPDPF
RGCC	2.70605e-107	0.988592	0.695	0.565	9.07556e-103	M1	RGCC
IFI30	4.19415e-106	0.573311	0.785	0.641	1.40663e-101	M1	IFI30
RAC2	4.62516e-106	0.445731	0.614	0.431	1.55119e-101	M1	RAC2
CLEC5A	5.41975e-106	0.514262	0.298	0.117	1.81768e-101	M1	CLEC5A
ALDOA	2.87313e-104	0.374763	0.356	0.17	9.6359e-100	M1	ALDOA
MCUB	2.76154e-103	0.466237	0.567	0.399	9.26166e-99	M1	MCUB
RFLNB	7.53619e-103	0.483648	0.253	0.089	2.52749e-98	M1	RFLNB
MMP19	1.99713e-102	0.578299	0.393	0.201	6.69796e-98	M1	MMP19
FKBP1A	3.78758e-102	0.393891	0.789	0.703	1.27028e-97	M1	FKBP1A
PDXK	9.80992e-102	0.512244	0.691	0.579	3.29005e-97	M1	PDXK
CD55	1.02351e-100	0.947121	0.616	0.484	3.43266e-96	M1	CD55
PPP1R14B	1.56108e-99	0.614386	0.716	0.629	5.23556e-95	M1	PPP1R14B
ATP2B1-AS1	1.48459e-98	0.84465	0.545	0.375	4.97903e-94	M1	ATP2B1-AS1
TMEM167A	2.31364e-98	0.458344	0.669	0.526	7.75948e-94	M1	TMEM167A
VASP	1.27545e-97	0.442158	0.716	0.58	4.27759e-93	M1	VASP
CYSTM1	4.2434e-97	0.521533	0.571	0.423	1.42315e-92	M1	CYSTM1
FABP4	5.74575e-96	2.19721	0.305	0.136	1.92701e-91	M1	FABP4
BRI3	2.4673e-95	0.357016	0.947	0.921	8.27484e-91	M1	BRI3
AC020656.1	3.34802e-95	1.06581	0.585	0.43	1.12286e-90	M1	AC020656.1
ZNF385A	6.65654e-94	0.395698	0.472	0.292	2.23247e-89	M1	ZNF385A
MMP24OS	3.05771e-93	0.463463	0.632	0.485	1.02549e-88	M1	MMP24OS
AREG	9.18558e-93	1.6412	0.454	0.279	3.08066e-88	M1	AREG
BZW1	1.05498e-91	0.539515	0.81	0.738	3.53818e-87	M1	BZW1
TMA7	1.24108e-91	0.336545	0.908	0.86	4.16233e-87	M1	TMA7
ACADVL	5.32732e-91	0.477215	0.591	0.449	1.78668e-86	M1	ACADVL
CEBPB	2.62473e-90	0.435347	0.949	0.907	8.8028e-86	M1	CEBPB
LILRA5	1.47298e-89	0.451573	0.26	0.107	4.9401e-85	M1	LILRA5
CSF3R	5.55085e-88	0.693347	0.396	0.239	1.86165e-83	M1	CSF3R
TCIRG1	6.28949e-88	0.396548	0.554	0.397	2.10937e-83	M1	TCIRG1
SDC2	1.00439e-87	0.728477	0.404	0.251	3.36851e-83	M1	SDC2
ATP13A3	3.36161e-86	0.489487	0.511	0.345	1.12742e-81	M1	ATP13A3
CALM3	6.05471e-86	0.432932	0.735	0.626	2.03063e-81	M1	CALM3
ANXA5	4.28819e-85	0.368699	0.93	0.918	1.43817e-80	M1	ANXA5
YBX1	5.06616e-85	0.279932	0.964	0.964	1.69909e-80	M1	YBX1
MAP3K20	1.49054e-84	0.350121	0.257	0.104	4.99899e-80	M1	MAP3K20
TALDO1	2.20178e-84	0.426535	0.834	0.785	7.38433e-80	M1	TALDO1
BST1	1.08123e-82	0.38772	0.341	0.181	3.62621e-78	M1	BST1
ZEB2	1.4866e-82	0.445856	0.864	0.767	4.98575e-78	M1	ZEB2
AP1S2	4.48536e-82	0.56232	0.716	0.636	1.5043e-77	M1	AP1S2
LGALS3	1.43684e-81	0.734273	0.916	0.838	4.81887e-77	M1	LGALS3
TPM4	6.2389e-81	0.413007	0.846	0.784	2.0924e-76	M1	TPM4
COX8A	2.7288e-80	0.309932	0.885	0.836	9.15184e-76	M1	COX8A
SLC39A8	6.77608e-80	0.504381	0.301	0.149	2.27256e-75	M1	SLC39A8
AP2S1	4.83108e-78	0.308171	0.868	0.818	1.62025e-73	M1	AP2S1
ACTN1	9.68728e-77	0.357858	0.425	0.262	3.24892e-72	M1	ACTN1
ASGR1	2.25793e-76	0.420659	0.425	0.266	7.57265e-72	M1	ASGR1
DDX21	3.27676e-76	0.436128	0.815	0.747	1.09896e-71	M1	DDX21
TXN	6.60598e-76	0.373728	0.839	0.761	2.21551e-71	M1	TXN
RAB11FIP1	1.02222e-75	0.460206	0.648	0.506	3.42832e-71	M1	RAB11FIP1
EIF4E2	1.73123e-75	0.340285	0.564	0.42	5.80621e-71	M1	EIF4E2
LRRFIP1	3.12308e-75	0.39801	0.885	0.827	1.04742e-70	M1	LRRFIP1
FAM107B	4.98912e-75	0.401459	0.698	0.567	1.67325e-70	M1	FAM107B
CHCHD2	2.05162e-73	0.261873	0.912	0.888	6.88072e-69	M1	CHCHD2
OST4	2.51957e-73	0.301024	0.879	0.831	8.45012e-69	M1	OST4
ATP5MC3	4.50677e-73	0.315903	0.862	0.833	1.51148e-68	M1	ATP5MC3
ANXA1	4.92034e-73	0.421088	0.952	0.935	1.65018e-68	M1	ANXA1
H3F3A	8.00222e-73	0.304969	0.981	0.978	2.68379e-68	M1	H3F3A
ANXA2	8.54564e-73	0.384573	0.907	0.845	2.86604e-68	M1	ANXA2
SLC43A2	1.88875e-72	0.476102	0.501	0.354	6.33449e-68	M1	SLC43A2
CARD19	2.72127e-72	0.351288	0.471	0.316	9.12661e-68	M1	CARD19
CD48	3.81363e-72	0.552889	0.585	0.442	1.27901e-67	M1	CD48
CATSPER1	3.93664e-72	0.281139	0.25	0.11	1.32027e-67	M1	CATSPER1
ADAM8	4.39683e-72	0.315526	0.263	0.12	1.47461e-67	M1	ADAM8
GCHFR	5.35753e-72	0.501742	0.367	0.211	1.79681e-67	M1	GCHFR
CNIH4	6.37332e-72	0.381302	0.495	0.35	2.13748e-67	M1	CNIH4
EIF5A	6.80655e-72	0.358437	0.769	0.71	2.28278e-67	M1	EIF5A
PTGER2	1.42173e-71	0.356446	0.349	0.193	4.7682e-67	M1	PTGER2
FAM20C	8.66732e-71	0.359575	0.309	0.163	2.90685e-66	M1	FAM20C
STMP1	1.00064e-69	0.333307	0.678	0.569	3.35596e-65	M1	STMP1
RNF181	6.72822e-69	0.331793	0.749	0.663	2.25651e-64	M1	RNF181
PSAP	1.42397e-67	0.25546	0.981	0.955	4.77571e-63	M1	PSAP
PRELID1	3.22789e-67	0.406687	0.829	0.773	1.08257e-62	M1	PRELID1
LIMD2	1.5266e-66	0.453406	0.469	0.328	5.11991e-62	M1	LIMD2
PPP4C	2.12105e-66	0.348313	0.667	0.562	7.11359e-62	M1	PPP4C
GSTP1	2.16582e-66	0.31195	0.918	0.911	7.26372e-62	M1	GSTP1
RAB5IF	2.30106e-66	0.339629	0.544	0.413	7.71729e-62	M1	RAB5IF
P4HB	1.29647e-65	0.397239	0.733	0.657	4.34811e-61	M1	P4HB
SRSF9	2.25815e-65	0.297084	0.807	0.75	7.57337e-61	M1	SRSF9
HM13	2.2854e-65	0.37657	0.693	0.615	7.66477e-61	M1	HM13
TRMT6	3.00191e-65	0.346102	0.262	0.13	1.00678e-60	M1	TRMT6
CLEC12A	4.28655e-65	0.538402	0.307	0.175	1.43762e-60	M1	CLEC12A
USP3	1.41744e-64	0.347597	0.464	0.316	4.7538e-60	M1	USP3
NDUFS5	2.82185e-64	0.305736	0.829	0.777	9.46394e-60	M1	NDUFS5
DDT	3.04259e-64	0.336732	0.701	0.608	1.02042e-59	M1	DDT
PLIN3	3.14182e-64	0.341823	0.608	0.488	1.0537e-59	M1	PLIN3
PPARG	1.24701e-63	0.363078	0.31	0.173	4.18224e-59	M1	PPARG
GPI	2.53527e-63	0.36014	0.419	0.279	8.5028e-59	M1	GPI
ATP6V0D1	5.88975e-62	0.337906	0.722	0.647	1.9753e-57	M1	ATP6V0D1
HCST	8.31721e-62	0.299783	0.896	0.834	2.78943e-57	M1	HCST
IFI6	6.48385e-61	0.431655	0.593	0.46	2.17455e-56	M1	IFI6
LYST	3.04285e-60	0.372237	0.347	0.211	1.02051e-55	M1	LYST
MCRIP2	7.06809e-59	0.286264	0.345	0.21	2.37049e-54	M1	MCRIP2
YWHAZ	1.10278e-58	0.265896	0.872	0.809	3.69851e-54	M1	YWHAZ
CORO1A	1.42004e-58	0.44389	0.725	0.661	4.76253e-54	M1	CORO1A
TXNDC17	1.55612e-57	0.312844	0.681	0.592	5.21892e-53	M1	TXNDC17
ATP6V1G1	1.82226e-57	0.26799	0.893	0.866	6.11149e-53	M1	ATP6V1G1
MT1F	4.93009e-57	0.433282	0.266	0.141	1.65345e-52	M1	MT1F
RBP7	9.7414e-57	0.43426	0.269	0.146	3.26707e-52	M1	RBP7
TUBA4A	1.67912e-56	0.289578	0.303	0.165	5.63142e-52	M1	TUBA4A
CD82	3.16452e-56	0.341658	0.313	0.183	1.06132e-51	M1	CD82
TLN1	1.44627e-55	0.316401	0.828	0.77	4.85049e-51	M1	TLN1
AGTRAP	1.91286e-55	0.375824	0.503	0.384	6.41534e-51	M1	AGTRAP
CYTIP	3.17176e-55	0.369348	0.647	0.53	1.06374e-50	M1	CYTIP
CIB1	7.36408e-55	0.297164	0.778	0.711	2.46976e-50	M1	CIB1
UCHL3	8.11828e-55	0.264084	0.428	0.294	2.72271e-50	M1	UCHL3
SLC6A6	9.80896e-55	0.251426	0.286	0.158	3.28973e-50	M1	SLC6A6
CXCL8	1.12854e-54	0.861017	0.656	0.532	3.78489e-50	M1	CXCL8
PNP	1.61282e-54	0.297129	0.44	0.305	5.40907e-50	M1	PNP
SEC61B	2.16293e-54	0.296025	0.883	0.846	7.25403e-50	M1	SEC61B
AL133453.1	2.6297e-54	0.278207	0.271	0.148	8.81948e-50	M1	AL133453.1
NDUFB9	1.24346e-53	0.296269	0.661	0.576	4.1703e-49	M1	NDUFB9
RNF7	1.29872e-53	0.300068	0.758	0.686	4.35564e-49	M1	RNF7
OLR1	2.6268e-53	0.499807	0.58	0.457	8.80977e-49	M1	OLR1
EIF6	3.95332e-53	0.307748	0.596	0.493	1.32587e-48	M1	EIF6
AVPI1	5.28841e-53	0.276557	0.338	0.207	1.77363e-48	M1	AVPI1
PTPRE	1.07942e-52	0.357859	0.828	0.755	3.62016e-48	M1	PTPRE
ITGB1	4.32385e-52	0.40651	0.769	0.714	1.45013e-47	M1	ITGB1
ACTN4	5.10928e-52	0.289253	0.444	0.311	1.71355e-47	M1	ACTN4
TIMM8B	1.10628e-51	0.28673	0.544	0.429	3.71024e-47	M1	TIMM8B
VDAC1	1.15218e-51	0.310747	0.711	0.648	3.86417e-47	M1	VDAC1
PSMB3	4.26609e-51	0.255668	0.829	0.794	1.43076e-46	M1	PSMB3
MARCKSL1	3.30225e-50	0.375131	0.308	0.182	1.10751e-45	M1	MARCKSL1
EIF4EBP1	4.02506e-50	0.305557	0.616	0.531	1.34992e-45	M1	EIF4EBP1
P4HA1	5.24644e-50	0.521013	0.503	0.393	1.75955e-45	M1	P4HA1
ENY2	8.27574e-50	0.268701	0.813	0.765	2.77552e-45	M1	ENY2
FNDC3B	1.03651e-49	0.340425	0.369	0.245	3.47624e-45	M1	FNDC3B
LSM7	1.04103e-49	0.294567	0.682	0.608	3.49141e-45	M1	LSM7
ACTG1	4.64112e-48	0.275781	0.959	0.951	1.55654e-43	M1	ACTG1
RALA	2.00764e-47	0.394794	0.618	0.53	6.73324e-43	M1	RALA
WARS	4.58998e-47	0.374175	0.27	0.156	1.53939e-42	M1	WARS
PRKCB	1.53819e-46	0.255324	0.302	0.182	5.15878e-42	M1	PRKCB
EAF1	2.75516e-46	0.250191	0.275	0.159	9.24024e-42	M1	EAF1
ITGB2	6.63862e-46	0.317648	0.882	0.877	2.22646e-41	M1	ITGB2
ATP5MPL	1.13536e-45	0.291972	0.735	0.685	3.80776e-41	M1	ATP5MPL
RRP7A	1.94078e-45	0.291672	0.486	0.374	6.50899e-41	M1	RRP7A
CCT5	9.27319e-45	0.297802	0.64	0.567	3.11004e-40	M1	CCT5
MYD88	1.04153e-44	0.277678	0.382	0.265	3.49307e-40	M1	MYD88
BASP1	8.9548e-44	0.666182	0.628	0.567	3.00326e-39	M1	BASP1
POLR2L	1.0565e-43	0.255333	0.767	0.709	3.54329e-39	M1	POLR2L
CAPN2	1.05799e-43	0.283466	0.385	0.27	3.54829e-39	M1	CAPN2
TAGLN2	3.25189e-43	0.275378	0.877	0.855	1.09062e-38	M1	TAGLN2
HEBP2	4.18551e-43	0.310784	0.614	0.512	1.40374e-38	M1	HEBP2
C19orf38	4.87909e-43	0.332067	0.27	0.169	1.63635e-38	M1	C19orf38
SSR2	1.32452e-42	0.268158	0.8	0.756	4.44216e-38	M1	SSR2
RAB8B	1.46974e-42	0.288059	0.526	0.417	4.92922e-38	M1	RAB8B
BID	2.13926e-42	0.275948	0.595	0.496	7.17466e-38	M1	BID
OXSR1	5.08966e-42	0.265933	0.313	0.203	1.70697e-37	M1	OXSR1
GK	8.63024e-42	0.410488	0.678	0.582	2.89441e-37	M1	GK
SNRPE	1.15089e-41	0.250436	0.558	0.461	3.85986e-37	M1	SNRPE
ACSL4	1.72824e-41	0.279703	0.393	0.283	5.79617e-37	M1	ACSL4
HPCAL1	1.78426e-41	0.274124	0.412	0.305	5.98404e-37	M1	HPCAL1
TRIM25	1.79016e-41	0.311083	0.287	0.18	6.00384e-37	M1	TRIM25
ABRACL	2.04775e-41	0.255963	0.701	0.623	6.86774e-37	M1	ABRACL
POLE4	3.85866e-41	0.278751	0.573	0.476	1.29412e-36	M1	POLE4
PTP4A2	3.95226e-41	0.285044	0.705	0.637	1.32551e-36	M1	PTP4A2
RXRA	4.51217e-41	0.258538	0.318	0.204	1.51329e-36	M1	RXRA
LRPAP1	5.26393e-41	0.301194	0.744	0.684	1.76542e-36	M1	LRPAP1
CPPED1	5.54918e-41	0.281783	0.387	0.28	1.86109e-36	M1	CPPED1
ZNHIT1	2.6384e-40	0.253236	0.686	0.611	8.84866e-36	M1	ZNHIT1
ETFB	1.00246e-39	0.289031	0.616	0.535	3.36204e-35	M1	ETFB
MT1X	1.54812e-39	1.34253	0.386	0.286	5.19209e-35	M1	MT1X
MBD2	2.24471e-39	0.28743	0.598	0.516	7.52832e-35	M1	MBD2
IRAK1	2.25163e-39	0.265039	0.382	0.272	7.55153e-35	M1	IRAK1
PIM3	2.94482e-39	0.289173	0.689	0.605	9.87635e-35	M1	PIM3
ZYX	8.32536e-39	0.260908	0.62	0.551	2.79216e-34	M1	ZYX
CTSA	1.86664e-38	0.258562	0.668	0.584	6.26033e-34	M1	CTSA
IGF2R	3.47308e-38	0.252575	0.318	0.209	1.1648e-33	M1	IGF2R
MRPS6	4.58565e-38	0.326669	0.484	0.385	1.53793e-33	M1	MRPS6
CORO1C	4.58576e-38	0.259614	0.386	0.279	1.53797e-33	M1	CORO1C
ANKRD28	1.95822e-37	0.320697	0.42	0.303	6.56748e-33	M1	ANKRD28
SERPINA1	2.06416e-37	0.540031	0.703	0.691	6.92277e-33	M1	SERPINA1
CD68	6.22112e-37	0.329447	0.943	0.934	2.08644e-32	M1	CD68
FAM162A	9.40162e-37	0.519669	0.516	0.441	3.15312e-32	M1	FAM162A
FRAT2	1.29702e-36	0.258623	0.298	0.193	4.34995e-32	M1	FRAT2
CDKN2D	3.48824e-36	0.259261	0.279	0.177	1.16989e-31	M1	CDKN2D
CYTOR	6.462e-36	0.255586	0.345	0.239	2.16722e-31	M1	CYTOR
MAP2K3	1.69978e-35	0.261908	0.424	0.316	5.70074e-31	M1	MAP2K3
PLA2G7	1.94409e-35	0.351375	0.373	0.266	6.5201e-31	M1	PLA2G7
APBB1IP	2.02805e-35	0.28042	0.703	0.631	6.80168e-31	M1	APBB1IP
ATP2B1	4.74433e-35	0.389637	0.739	0.694	1.59115e-30	M1	ATP2B1
DMXL2	6.03232e-35	0.30054	0.394	0.295	2.02312e-30	M1	DMXL2
CLEC4E	1.50752e-34	0.406689	0.336	0.243	5.05594e-30	M1	CLEC4E
SLC2A3	6.50215e-34	0.535237	0.656	0.594	2.18069e-29	M1	SLC2A3
TUBA1C	1.66299e-33	0.320117	0.699	0.653	5.57734e-29	M1	TUBA1C
LSM6	3.82449e-33	0.263379	0.502	0.412	1.28266e-28	M1	LSM6
LST1	4.71822e-33	0.476623	0.805	0.794	1.5824e-28	M1	LST1
SLC16A3	1.80052e-32	0.258187	0.586	0.497	6.03859e-28	M1	SLC16A3
ZFYVE16	5.60896e-32	0.373515	0.551	0.476	1.88113e-27	M1	ZFYVE16
MXD1	6.08624e-32	0.399782	0.484	0.395	2.0412e-27	M1	MXD1
NFIL3	7.81684e-32	0.323798	0.569	0.487	2.62161e-27	M1	NFIL3
SEC62	2.66152e-31	0.301804	0.857	0.835	8.92622e-27	M1	SEC62
FOSL2	2.1e-30	0.278288	0.578	0.489	7.04298e-26	M1	FOSL2
CTSD	2.15217e-29	0.561964	0.923	0.914	7.21796e-25	M1	CTSD
TMED5	5.90755e-29	0.262141	0.548	0.473	1.98127e-24	M1	TMED5
SRGN	6.42554e-29	0.283828	0.983	0.98	2.155e-24	M1	SRGN
TDP2	7.05597e-29	0.25106	0.277	0.19	2.36643e-24	M1	TDP2
MPP1	8.46337e-29	0.258798	0.594	0.526	2.83844e-24	M1	MPP1
PPIB	1.26739e-28	0.280151	0.886	0.89	4.25058e-24	M1	PPIB
MYO1G	1.32665e-28	0.270974	0.309	0.223	4.44933e-24	M1	MYO1G
MT2A	6.64817e-28	1.10771	0.654	0.582	2.22966e-23	M1	MT2A
THBS1	2.35896e-27	0.943458	0.258	0.182	7.9115e-23	M1	THBS1
LY6E	3.12016e-27	0.272119	0.572	0.484	1.04644e-22	M1	LY6E
CD99	1.2504e-26	0.258993	0.825	0.815	4.19359e-22	M1	CD99
P2RX4	1.84172e-26	0.256425	0.367	0.286	6.17676e-22	M1	P2RX4
VKORC1	2.60567e-26	0.292247	0.602	0.568	8.7389e-22	M1	VKORC1
TKT	1.15945e-25	0.4837	0.74	0.751	3.88857e-21	M1	TKT
TNFRSF1B	9.79716e-25	0.30277	0.671	0.631	3.28577e-20	M1	TNFRSF1B
RILPL2	7.21605e-24	0.267835	0.689	0.634	2.42012e-19	M1	RILPL2
ACSL3	1.69434e-23	0.264957	0.476	0.406	5.68248e-19	M1	ACSL3
MX2	7.0503e-23	0.295293	0.443	0.367	2.36453e-18	M1	MX2
USP15	9.70934e-21	0.272262	0.637	0.585	3.25632e-16	M1	USP15
CXCL2	1.02919e-19	0.498982	0.583	0.52	3.45168e-15	M1	CXCL2
PHACTR1	8.01849e-19	0.300516	0.633	0.597	2.68924e-14	M1	PHACTR1
SERPINB1	1.62878e-18	0.335479	0.801	0.79	5.4626e-14	M1	SERPINB1
BCAP31	1.75077e-18	0.264489	0.708	0.701	5.87174e-14	M1	BCAP31
ERN1	1.69647e-16	0.255492	0.287	0.226	5.68963e-12	M1	ERN1
GPNMB	2.10142e-16	0.301723	0.545	0.508	7.04775e-12	M1	GPNMB
BNIP3	7.8128e-16	0.285166	0.284	0.232	2.62026e-11	M1	BNIP3
IL1B	1.78143e-15	0.745642	0.513	0.462	5.97456e-11	M1	IL1B
ABHD5	9.60282e-15	0.332087	0.391	0.333	3.22059e-10	M1	ABHD5
CXCL3	2.27568e-13	0.512005	0.509	0.461	7.63217e-09	M1	CXCL3
RAB13	6.13038e-12	0.255173	0.516	0.511	2.05601e-07	M1	RAB13
MGLL	8.96218e-11	0.30568	0.378	0.349	3.00574e-06	M1	MGLL
FPR1	1.83464e-09	0.347923	0.541	0.555	6.15301e-05	M1	FPR1
SAMSN1	6.63563e-08	0.497273	0.551	0.57	0.00222546	M1	SAMSN1
CTSL	8.54155e-08	0.651755	0.785	0.837	0.00286467	M1	CTSL
CTSS	9.90976e-08	0.39356	0.944	0.949	0.00332353	M1	CTSS
OSM	3.83032e-07	0.302428	0.294	0.262	0.0128461	M1	OSM
NAMPT	1.92601e-05	0.277507	0.898	0.894	0.645944	M1	NAMPT
APOC1	6.90178e-05	0.681206	0.488	0.499	1	M1	APOC1
JAML	0.000152208	0.298846	0.371	0.378	1	M1	JAML
CCL2	0.00324688	0.822341	0.469	0.561	1	M1	CCL2
SELENOP	0	2.45963	0.785	0.297	0	M2	SELENOP
FOLR2	0	1.84241	0.743	0.348	0	M2	FOLR2
C1QA	0	1.74905	0.869	0.474	0	M2	C1QA
C1QB	0	1.74689	0.866	0.436	0	M2	C1QB
SLC40A1	0	1.66707	0.602	0.194	0	M2	SLC40A1
LGMN	0	1.59495	0.811	0.456	0	M2	LGMN
C1QC	0	1.59335	0.869	0.464	0	M2	C1QC
MS4A4A	2.94956e-297	1.42995	0.836	0.563	9.89222e-293	M2	MS4A4A
PLTP	1.39595e-284	1.88521	0.833	0.507	4.68172e-280	M2	PLTP
IGF1	4.78775e-248	0.911344	0.434	0.111	1.60572e-243	M2	IGF1
DAB2	2.03207e-232	1.38963	0.821	0.575	6.81514e-228	M2	DAB2
LILRB5	4.54758e-222	0.870039	0.368	0.086	1.52517e-217	M2	LILRB5
CTSC	1.10476e-210	1.35016	0.847	0.717	3.70513e-206	M2	CTSC
CCL18	2.8967e-201	3.21687	0.324	0.073	9.71496e-197	M2	CCL18
MRC1	9.35176e-192	1.49985	0.714	0.405	3.13639e-187	M2	MRC1
MS4A7	1.97732e-183	0.953857	0.891	0.813	6.63154e-179	M2	MS4A7
CD209	7.1067e-183	0.605026	0.265	0.049	2.38344e-178	M2	CD209
CXCL12	4.28692e-175	0.72138	0.367	0.104	1.43775e-170	M2	CXCL12
MS4A6A	1.55257e-174	0.922552	0.871	0.697	5.207e-170	M2	MS4A6A
F13A1	2.65759e-173	1.94681	0.686	0.444	8.91302e-169	M2	F13A1
FCGRT	1.16679e-166	0.728416	0.899	0.925	3.91318e-162	M2	FCGRT
TMEM37	2.72024e-157	0.61434	0.452	0.172	9.12316e-153	M2	TMEM37
SLCO2B1	6.08269e-152	0.799253	0.57	0.278	2.04001e-147	M2	SLCO2B1
GPR34	1.08237e-149	0.832378	0.608	0.301	3.63006e-145	M2	GPR34
CTSZ	4.95754e-139	0.726055	0.925	0.92	1.66266e-134	M2	CTSZ
TSPAN4	1.74793e-136	0.766622	0.651	0.397	5.86219e-132	M2	TSPAN4
TMEM176B	3.62415e-135	0.858781	0.83	0.651	1.21547e-130	M2	TMEM176B
ME1	1.16007e-134	0.513286	0.344	0.113	3.89064e-130	M2	ME1
WWP1	2.28713e-134	0.731343	0.4	0.156	7.67056e-130	M2	WWP1
TMEM176A	1.77736e-130	0.857234	0.734	0.509	5.96092e-126	M2	TMEM176A
GAS6	7.06673e-128	0.791231	0.569	0.315	2.37004e-123	M2	GAS6
PMP22	6.40534e-126	0.994371	0.619	0.364	2.14822e-121	M2	PMP22
CD59	2.6849e-125	0.69953	0.557	0.295	9.00462e-121	M2	CD59
FUCA1	2.77327e-124	0.707017	0.549	0.307	9.30099e-120	M2	FUCA1
ARL4C	9.9615e-124	0.972221	0.709	0.486	3.34089e-119	M2	ARL4C
C2	1.15989e-120	0.716742	0.384	0.155	3.89003e-116	M2	C2
PDK4	7.30446e-117	1.68125	0.426	0.191	2.44977e-112	M2	PDK4
ITM2B	9.43419e-117	0.588365	0.954	0.963	3.16404e-112	M2	ITM2B
CD163	9.10822e-116	0.90808	0.797	0.678	3.05471e-111	M2	CD163
NPC2	4.16326e-115	0.424582	0.954	0.967	1.39627e-110	M2	NPC2
SNX6	2.01561e-113	0.707212	0.814	0.718	6.75996e-109	M2	SNX6
STAB1	5.52924e-112	0.99079	0.554	0.313	1.8544e-107	M2	STAB1
SDC3	8.3232e-108	0.548077	0.387	0.165	2.79143e-103	M2	SDC3
CD74	5.86735e-107	0.616523	0.981	0.96	1.96779e-102	M2	CD74
RNASE1	6.35377e-106	1.27753	0.739	0.493	2.13093e-101	M2	RNASE1
MAF	6.67811e-106	0.937884	0.598	0.369	2.2397e-101	M2	MAF
CREG1	6.75818e-105	0.699972	0.77	0.643	2.26656e-100	M2	CREG1
CCL8	1.79219e-103	1.2844	0.298	0.104	6.01066e-99	M2	CCL8
PDGFC	3.14934e-102	0.430032	0.257	0.081	1.05622e-97	M2	PDGFC
EPHX1	3.9273e-102	0.488809	0.335	0.132	1.31714e-97	M2	EPHX1
CFD	9.08078e-98	1.00691	0.827	0.786	3.04551e-93	M2	CFD
ADAMDEC1	2.17441e-97	0.730355	0.315	0.122	7.29253e-93	M2	ADAMDEC1
CPM	1.74836e-95	0.689722	0.581	0.355	5.86367e-91	M2	CPM
APOE	3.80203e-95	1.3764	0.699	0.51	1.27512e-90	M2	APOE
ITSN1	2.96893e-93	0.631635	0.387	0.178	9.95719e-89	M2	ITSN1
KCNMA1	2.16997e-89	0.605445	0.453	0.234	7.27763e-85	M2	KCNMA1
IQGAP2	6.02029e-89	0.67513	0.707	0.547	2.01908e-84	M2	IQGAP2
SERPING1	7.18011e-89	0.654103	0.484	0.263	2.40807e-84	M2	SERPING1
CR1	7.90255e-89	0.443178	0.306	0.121	2.65036e-84	M2	CR1
HLA-DQA1	1.3038e-86	0.731608	0.82	0.64	4.37269e-82	M2	HLA-DQA1
ENPP2	2.26341e-85	0.546336	0.331	0.144	7.59102e-81	M2	ENPP2
NRP1	1.27565e-81	0.713432	0.569	0.357	4.27828e-77	M2	NRP1
A2M	2.90805e-78	0.622997	0.485	0.276	9.75302e-74	M2	A2M
SIGLEC1	1.54038e-75	0.43799	0.293	0.121	5.16612e-71	M2	SIGLEC1
HLA-DMA	1.97126e-74	0.567113	0.858	0.78	6.61121e-70	M2	HLA-DMA
PLD3	2.63815e-74	0.593671	0.75	0.612	8.84784e-70	M2	PLD3
CCL4	1.2547e-72	0.990704	0.719	0.555	4.20801e-68	M2	CCL4
RGL1	7.37367e-72	0.486811	0.382	0.195	2.47298e-67	M2	RGL1
CST3	6.17355e-71	0.500812	0.979	0.988	2.07049e-66	M2	CST3
AP2A2	1.64303e-70	0.516505	0.411	0.226	5.51039e-66	M2	AP2A2
GYPC	3.0834e-69	0.693053	0.651	0.489	1.03411e-64	M2	GYPC
ALDH1A1	5.04368e-69	0.398768	0.266	0.108	1.69155e-64	M2	ALDH1A1
TFRC	1.95247e-68	0.921907	0.582	0.407	6.5482e-64	M2	TFRC
AKR1B1	2.01807e-68	0.584617	0.577	0.4	6.7682e-64	M2	AKR1B1
SPATS2L	1.70406e-67	0.561523	0.442	0.261	5.71508e-63	M2	SPATS2L
MARCKS	2.26672e-67	0.466156	0.878	0.848	7.60213e-63	M2	MARCKS
FTL	3.06034e-67	0.435092	0.997	1	1.02638e-62	M2	FTL
FCHO2	5.02268e-67	0.515339	0.55	0.364	1.68451e-62	M2	FCHO2
HSPA1B	5.7553e-64	0.884895	0.649	0.476	1.93021e-59	M2	HSPA1B
HLA-DPA1	1.70733e-63	0.489767	0.947	0.881	5.72604e-59	M2	HLA-DPA1
HSPA1A	2.72347e-61	0.821056	0.805	0.703	9.13399e-57	M2	HSPA1A
HLA-DPB1	4.66354e-61	0.480479	0.925	0.853	1.56406e-56	M2	HLA-DPB1
BLVRB	2.68139e-60	0.529998	0.858	0.846	8.99285e-56	M2	BLVRB
PEBP1	5.97128e-59	0.508321	0.719	0.59	2.00265e-54	M2	PEBP1
OTOA	1.44264e-58	0.395704	0.281	0.132	4.83832e-54	M2	OTOA
FAM213A	2.30272e-58	0.286416	0.262	0.117	7.72286e-54	M2	FAM213A
CCL3	6.13177e-57	0.761998	0.809	0.714	2.05647e-52	M2	CCL3
CCL4L2	1.62987e-56	1.02737	0.594	0.435	5.46625e-52	M2	CCL4L2
STMN1	2.1105e-55	0.501648	0.545	0.369	7.07819e-51	M2	STMN1
ATP1B1	4.9934e-55	0.547035	0.545	0.375	1.67469e-50	M2	ATP1B1
SLC7A8	6.67017e-55	0.314017	0.269	0.125	2.23704e-50	M2	SLC7A8
HSP90AA1	8.44004e-55	0.638285	0.933	0.952	2.83062e-50	M2	HSP90AA1
HLA-DMB	1.49509e-54	0.50923	0.75	0.624	5.01423e-50	M2	HLA-DMB
FILIP1L	6.93154e-54	0.619838	0.48	0.295	2.3247e-49	M2	FILIP1L
HLA-DRB1	1.73226e-53	0.455922	0.958	0.962	5.80967e-49	M2	HLA-DRB1
HLA-DQB1	1.81855e-53	0.484486	0.846	0.761	6.09906e-49	M2	HLA-DQB1
HLA-DRB5	4.13477e-53	0.468095	0.923	0.903	1.38672e-48	M2	HLA-DRB5
NRP2	5.72763e-52	0.471801	0.604	0.432	1.92093e-47	M2	NRP2
HLA-DRA	1.93233e-51	0.439957	0.965	0.943	6.48065e-47	M2	HLA-DRA
MFSD1	4.9737e-51	0.516967	0.74	0.671	1.66808e-46	M2	MFSD1
CD81	2.32043e-50	0.495634	0.852	0.823	7.78225e-46	M2	CD81
HSPB1	1.4494e-49	0.55248	0.737	0.621	4.861e-45	M2	HSPB1
LTC4S	5.22979e-49	0.551333	0.456	0.289	1.75397e-44	M2	LTC4S
FRMD4B	2.17836e-48	0.564908	0.625	0.48	7.30578e-44	M2	FRMD4B
FRMD4A	4.28766e-48	0.295678	0.268	0.133	1.43799e-43	M2	FRMD4A
GATM	7.67507e-48	0.380317	0.367	0.212	2.57407e-43	M2	GATM
AXL	1.1289e-47	0.359163	0.336	0.183	3.78612e-43	M2	AXL
AP1B1	1.87338e-47	0.381455	0.423	0.266	6.28293e-43	M2	AP1B1
EMB	6.53802e-47	0.597395	0.478	0.324	2.19272e-42	M2	EMB
SPRED1	4.08384e-46	0.490489	0.4	0.246	1.36964e-41	M2	SPRED1
TUBA1B	4.53511e-46	0.438967	0.91	0.896	1.52098e-41	M2	TUBA1B
VSIG4	4.79399e-46	0.531309	0.673	0.532	1.60781e-41	M2	VSIG4
UGCG	7.93689e-46	0.536048	0.483	0.336	2.66187e-41	M2	UGCG
IDH1	2.9883e-45	0.356188	0.396	0.246	1.00222e-40	M2	IDH1
TMSB4X	1.13743e-44	0.307486	0.991	0.994	3.81471e-40	M2	TMSB4X
PRKACB	1.98005e-44	0.305752	0.3	0.162	6.64071e-40	M2	PRKACB
SASH1	3.47291e-43	0.322304	0.262	0.134	1.16474e-38	M2	SASH1
MYO5A	8.11855e-43	0.395845	0.368	0.223	2.7228e-38	M2	MYO5A
MAN1A1	1.95617e-42	0.584873	0.39	0.252	6.56062e-38	M2	MAN1A1
RASSF4	2.82878e-41	0.473904	0.652	0.521	9.48717e-37	M2	RASSF4
EGR1	5.25675e-41	0.738052	0.317	0.184	1.76301e-36	M2	EGR1
FCGR2A	2.21148e-40	0.478372	0.804	0.77	7.41688e-36	M2	FCGR2A
MERTK	1.07941e-39	0.317917	0.371	0.225	3.62013e-35	M2	MERTK
GRN	1.98716e-39	0.317833	0.87	0.915	6.66453e-35	M2	GRN
DNAJB1	3.79671e-39	0.640914	0.648	0.531	1.27334e-34	M2	DNAJB1
RB1	3.94273e-39	0.50336	0.589	0.463	1.32231e-34	M2	RB1
DST	4.48975e-39	0.324877	0.286	0.159	1.50577e-34	M2	DST
MTSS1	2.81724e-38	0.488109	0.542	0.408	9.44846e-34	M2	MTSS1
CSF1R	4.22159e-38	0.588759	0.683	0.596	1.41584e-33	M2	CSF1R
GOLGA4	6.52108e-38	0.589155	0.569	0.453	2.18704e-33	M2	GOLGA4
IFITM3	7.88078e-38	0.348362	0.845	0.782	2.64306e-33	M2	IFITM3
ADAP2	1.98204e-37	0.45247	0.715	0.605	6.64736e-33	M2	ADAP2
TPT1	5.17386e-37	0.398662	0.991	0.993	1.73521e-32	M2	TPT1
CD14	9.99585e-37	0.371925	0.928	0.937	3.35241e-32	M2	CD14
CD72	2.53245e-36	0.330127	0.353	0.218	8.49332e-32	M2	CD72
RCAN1	9.99007e-36	0.594345	0.271	0.155	3.35047e-31	M2	RCAN1
ITPR2	1.08733e-35	0.44229	0.5	0.365	3.64668e-31	M2	ITPR2
SLC1A3	1.50836e-35	0.408841	0.409	0.274	5.05872e-31	M2	SLC1A3
HSPH1	1.81743e-35	0.678221	0.526	0.403	6.09529e-31	M2	HSPH1
SERPINF1	4.02978e-35	0.398857	0.342	0.21	1.35151e-30	M2	SERPINF1
SLAMF8	8.32364e-35	0.321682	0.445	0.302	2.79158e-30	M2	SLAMF8
NUPR1	9.66812e-35	0.543344	0.256	0.141	3.24249e-30	M2	NUPR1
SLC9A9	1.10324e-34	0.29701	0.283	0.163	3.70004e-30	M2	SLC9A9
HLA-DOA	1.82609e-34	0.293823	0.32	0.191	6.12435e-30	M2	HLA-DOA
CEBPD	3.63072e-34	0.33414	0.954	0.958	1.21767e-29	M2	CEBPD
OSBPL1A	4.01752e-34	0.302177	0.331	0.202	1.34739e-29	M2	OSBPL1A
GPR155	4.18803e-34	0.310545	0.276	0.156	1.40458e-29	M2	GPR155
LY96	9.07421e-34	0.433395	0.71	0.681	3.04331e-29	M2	LY96
SMPDL3A	3.89741e-33	0.348075	0.361	0.231	1.30711e-28	M2	SMPDL3A
FPR3	1.15166e-32	0.338073	0.475	0.336	3.86242e-28	M2	FPR3
TCF4	1.86798e-32	0.342384	0.371	0.243	6.26482e-28	M2	TCF4
PTMS	1.98343e-32	0.327915	0.613	0.472	6.65204e-28	M2	PTMS
APOC11	8.54426e-32	0.48657	0.604	0.467	2.86558e-27	M2	APOC1
LPAR6	5.41196e-31	0.406195	0.501	0.364	1.81506e-26	M2	LPAR6
HEXA	6.46718e-31	0.347259	0.603	0.501	2.16896e-26	M2	HEXA
NCF4	1.02981e-30	0.411988	0.686	0.608	3.45378e-26	M2	NCF4
OLFML2B	9.41167e-30	0.261795	0.409	0.278	3.15648e-25	M2	OLFML2B
ACP5	4.24978e-29	0.513171	0.54	0.443	1.42529e-24	M2	ACP5
CLTA	8.29583e-29	0.36299	0.816	0.833	2.78225e-24	M2	CLTA
GPR137B	2.03382e-28	0.355933	0.44	0.316	6.82103e-24	M2	GPR137B
TIMP2	3.78359e-28	0.338364	0.797	0.815	1.26894e-23	M2	TIMP2
LIPA	4.54807e-28	0.407603	0.622	0.523	1.52533e-23	M2	LIPA
RGS10	4.7097e-28	0.397047	0.793	0.767	1.57954e-23	M2	RGS10
EGR2	8.92699e-28	0.416775	0.333	0.223	2.99394e-23	M2	EGR2
UBB	2.70973e-27	0.285073	0.877	0.915	9.08788e-23	M2	UBB
ARHGAP18	2.75376e-27	0.379835	0.773	0.72	9.23557e-23	M2	ARHGAP18
RNASE6	6.69199e-27	0.380522	0.669	0.589	2.24436e-22	M2	RNASE6
ABHD12	7.59619e-27	0.343814	0.419	0.308	2.54761e-22	M2	ABHD12
SNX2	1.48524e-26	0.391567	0.736	0.69	4.98121e-22	M2	SNX2
TNFSF12	1.79078e-26	0.357511	0.62	0.516	6.0059e-22	M2	TNFSF12
MGST2	5.08357e-26	0.36694	0.566	0.48	1.70493e-21	M2	MGST2
SNX9	9.35541e-26	0.324321	0.445	0.332	3.13762e-21	M2	SNX9
ARRDC3	1.00607e-25	0.448971	0.42	0.308	3.37417e-21	M2	ARRDC3
PRNP	1.32335e-25	0.412018	0.54	0.443	4.43826e-21	M2	PRNP
EPB41L2	1.42871e-25	0.308888	0.366	0.252	4.79159e-21	M2	EPB41L2
CH25H	1.82986e-25	0.708159	0.316	0.208	6.13698e-21	M2	CH25H
BMP2K	3.02055e-25	0.393263	0.532	0.423	1.01303e-20	M2	BMP2K
IGSF6	5.24582e-25	0.533455	0.773	0.749	1.75934e-20	M2	IGSF6
CD84	9.05638e-25	0.311794	0.614	0.516	3.03733e-20	M2	CD84
TNFAIP2	1.22249e-24	0.407891	0.513	0.402	4.09999e-20	M2	TNFAIP2
PRDX1	2.4886e-24	0.290671	0.852	0.868	8.34628e-20	M2	PRDX1
IGSF21	3.84841e-24	0.290944	0.285	0.177	1.29068e-19	M2	IGSF21
PEPD	9.07379e-24	0.432214	0.592	0.524	3.04317e-19	M2	PEPD
AKR1A1	2.26925e-23	0.352651	0.723	0.69	7.61061e-19	M2	AKR1A1
C1orf54	4.20836e-23	0.314108	0.443	0.331	1.4114e-18	M2	C1orf54
GOLIM4	5.3949e-23	0.304032	0.458	0.342	1.80934e-18	M2	GOLIM4
DNASE2	7.6698e-23	0.339284	0.46	0.366	2.5723e-18	M2	DNASE2
KLF6	1.56419e-22	0.401292	0.879	0.875	5.24597e-18	M2	KLF6
ZFHX3	1.91412e-22	0.294506	0.415	0.302	6.41958e-18	M2	ZFHX3
RGS1	3.05703e-22	0.360363	0.624	0.514	1.02527e-17	M2	RGS1
CCL3L1	1.33421e-21	0.495676	0.559	0.468	4.47467e-17	M2	CCL3L1
SGMS1	1.70538e-21	0.274526	0.3	0.201	5.7195e-17	M2	SGMS1
CPEB4	2.18541e-21	0.450981	0.448	0.36	7.32944e-17	M2	CPEB4
KCTD12	3.32198e-21	0.413934	0.545	0.463	1.11413e-16	M2	KCTD12
UCP2	3.89986e-21	0.376194	0.692	0.647	1.30794e-16	M2	UCP2
NCOA4	5.07739e-21	0.334699	0.589	0.504	1.70285e-16	M2	NCOA4
CD302	6.7659e-21	0.317659	0.581	0.47	2.26915e-16	M2	CD302
PLAU	8.2704e-21	0.308417	0.342	0.239	2.77373e-16	M2	PLAU
CD4	3.32331e-20	0.297151	0.542	0.438	1.11457e-15	M2	CD4
ATOX1	3.45659e-20	0.358165	0.705	0.675	1.15927e-15	M2	ATOX1
CYFIP1	7.56051e-20	0.277035	0.538	0.448	2.53564e-15	M2	CYFIP1
NTAN1	1.32918e-19	0.285235	0.532	0.431	4.4578e-15	M2	NTAN1
LAMP2	1.57504e-19	0.313952	0.653	0.601	5.28237e-15	M2	LAMP2
APMAP	2.17575e-19	0.259451	0.4	0.3	7.29704e-15	M2	APMAP
VEGFB	2.19233e-19	0.293681	0.635	0.538	7.35263e-15	M2	VEGFB
DSC2	5.10335e-19	0.265418	0.415	0.316	1.71156e-14	M2	DSC2
CPVL	5.91708e-19	0.296439	0.773	0.719	1.98447e-14	M2	CPVL
MGAT4A	1.07823e-18	0.329754	0.55	0.46	3.61617e-14	M2	MGAT4A
LMNA	1.21901e-18	0.38741	0.714	0.626	4.08832e-14	M2	LMNA
SNX29	1.35268e-18	0.259696	0.408	0.308	4.53663e-14	M2	SNX29
NR4A2	2.70534e-18	0.44749	0.775	0.753	9.07317e-14	M2	NR4A2
CLTC	2.7372e-18	0.364347	0.569	0.5	9.18003e-14	M2	CLTC
HNMT	2.79602e-18	0.372767	0.679	0.638	9.37728e-14	M2	HNMT
ASAH1	6.04441e-18	0.293177	0.82	0.87	2.02718e-13	M2	ASAH1
EPS15	1.0902e-17	0.312829	0.362	0.272	3.65632e-13	M2	EPS15
DRAM2	1.42702e-17	0.310536	0.598	0.535	4.78595e-13	M2	DRAM2
HMOX1	1.92203e-17	0.469787	0.783	0.765	6.44611e-13	M2	HMOX1
C3AR1	2.0123e-17	0.25755	0.71	0.65	6.74884e-13	M2	C3AR1
P2RY13	2.07414e-17	0.29769	0.413	0.315	6.95624e-13	M2	P2RY13
EPB41L3	6.49624e-17	0.275616	0.555	0.473	2.17871e-12	M2	EPB41L3
BTG2	9.80811e-17	0.448887	0.719	0.671	3.28944e-12	M2	BTG2
STOM	2.16228e-16	0.310035	0.428	0.345	7.25186e-12	M2	STOM
HERPUD1	3.35108e-16	0.261096	0.824	0.797	1.12388e-11	M2	HERPUD1
GNPDA1	1.42242e-15	0.279264	0.487	0.403	4.77052e-11	M2	GNPDA1
MPEG1	1.4457e-15	0.278803	0.507	0.421	4.8486e-11	M2	MPEG1
NPL	2.47487e-15	0.287547	0.584	0.507	8.3002e-11	M2	NPL
LAIR1	3.0395e-15	0.284214	0.668	0.624	1.01939e-10	M2	LAIR1
NAIP	6.12966e-15	0.257868	0.446	0.36	2.05577e-10	M2	NAIP
STX7	8.67007e-15	0.30116	0.56	0.488	2.90777e-10	M2	STX7
DNPH1	9.73037e-15	0.254189	0.567	0.488	3.26337e-10	M2	DNPH1
TLR4	1.1499e-14	0.255835	0.375	0.292	3.85654e-10	M2	TLR4
GPNMB1	1.59405e-14	0.357979	0.582	0.515	5.34613e-10	M2	GPNMB
HSPA8	2.35932e-14	0.255006	0.854	0.867	7.91269e-10	M2	HSPA8
ZFP36L1	3.5935e-14	0.361555	0.874	0.892	1.20519e-09	M2	ZFP36L1
IL18	6.04921e-14	0.277678	0.557	0.476	2.02878e-09	M2	IL18
EVA1B	6.11864e-14	0.252259	0.376	0.293	2.05207e-09	M2	EVA1B
JUN	6.56827e-14	0.422948	0.813	0.791	2.20287e-09	M2	JUN
ATF3	1.06425e-13	0.322348	0.8	0.821	3.56928e-09	M2	ATF3
GLUL	3.52871e-13	0.277726	0.891	0.919	1.18346e-08	M2	GLUL
PNRC1	6.49229e-13	0.250107	0.915	0.942	2.17738e-08	M2	PNRC1
FEZ2	1.30512e-12	0.273959	0.53	0.466	4.37712e-08	M2	FEZ2
SOD1	1.87184e-12	0.282391	0.687	0.653	6.27778e-08	M2	SOD1
LAP3	5.3834e-12	0.277652	0.742	0.718	1.80548e-07	M2	LAP3
AHR	1.13589e-11	0.287316	0.384	0.31	3.80954e-07	M2	AHR
VOPP1	1.56815e-11	0.269222	0.344	0.277	5.25925e-07	M2	VOPP1
TACC1	5.4219e-11	0.315911	0.594	0.54	1.8184e-06	M2	TACC1
IL6ST	5.49457e-11	0.263881	0.308	0.241	1.84277e-06	M2	IL6ST
RASGEF1B	8.90322e-11	0.313423	0.693	0.676	2.98596e-06	M2	RASGEF1B
BLVRA	1.7795e-10	0.279844	0.578	0.527	5.9681e-06	M2	BLVRA
ELL2	2.58262e-10	0.313292	0.474	0.407	8.66159e-06	M2	ELL2
NR4A3	3.50775e-10	0.445814	0.483	0.427	1.17643e-05	M2	NR4A3
HSPE1	5.04746e-10	0.302527	0.73	0.723	1.69282e-05	M2	HSPE1
KLF9	1.93894e-09	0.37106	0.3	0.247	6.50283e-05	M2	KLF9
FGL2	3.41069e-09	0.388198	0.671	0.618	0.000114388	M2	FGL2
IRF8	4.38593e-09	0.259281	0.491	0.435	0.000147095	M2	IRF8
ISCU	5.97021e-09	0.264507	0.639	0.607	0.000200229	M2	ISCU
CBR1	6.58884e-09	0.262248	0.453	0.392	0.000220977	M2	CBR1
RBPJ	2.57348e-08	0.474998	0.681	0.665	0.000863095	M2	RBPJ
RAP2B	3.04681e-08	0.27145	0.585	0.55	0.00102184	M2	RAP2B
FOSB	3.88431e-08	0.473274	0.733	0.749	0.00130272	M2	FOSB
AMD1	1.21985e-07	0.26291	0.606	0.579	0.00409112	M2	AMD1
RAB32	1.78799e-07	0.313578	0.667	0.675	0.00599657	M2	RAB32
ZFAND5	9.14217e-07	0.383996	0.72	0.722	0.030661	M2	ZFAND5
DDX24	1.37886e-06	0.253818	0.715	0.717	0.0462443	M2	DDX24
INSIG1	3.76399e-06	0.274687	0.632	0.611	0.126237	M2	INSIG1
RHOB	9.99914e-06	0.32897	0.619	0.599	0.335351	M2	RHOB
KLF4	1.81906e-05	0.333064	0.701	0.719	0.610075	M2	KLF4
IER5	1.93191e-05	0.303954	0.524	0.492	0.647925	M2	IER5
HNRNPU	3.10953e-05	0.36702	0.815	0.861	1	M2	HNRNPU
HSPD1	3.28599e-05	0.29329	0.717	0.717	1	M2	HSPD1
NR4A1	0.00014325	0.363857	0.6	0.584	1	M2	NR4A1
FCGR2B	0.000211006	0.251068	0.443	0.412	1	M2	FCGR2B
TRA2B	0.00233632	0.374236	0.565	0.554	1	M2	TRA2B
TSC22D3	0.00275063	0.314648	0.618	0.611	1	M2	TSC22D3
KLF2	0.0048198	0.348959	0.633	0.625	1	M2	KLF2
ANKRD12	0.00483596	0.259084	0.625	0.624	1	M2	ANKRD12
HLA-DPA11	0	1.54161	0.983	0.86	0	M2/M1	HLA-DPA1
HLA-DQA11	0	1.53309	0.932	0.577	0	M2/M1	HLA-DQA1
HLA-DPB11	0	1.36595	0.976	0.825	0	M2/M1	HLA-DPB1
HLA-DRA1	0	1.33277	0.987	0.932	0	M2/M1	HLA-DRA
C1QC1	0	1.2535	0.882	0.412	0	M2/M1	C1QC
HLA-DRB11	0	1.24047	0.993	0.949	0	M2/M1	HLA-DRB1
HLA-DRB51	0	1.22333	0.977	0.88	0	M2/M1	HLA-DRB5
C1QB1	0	1.1961	0.857	0.39	0	M2/M1	C1QB
CD741	0	1.1807	0.995	0.953	0	M2/M1	CD74
HLA-DQB11	0	1.17861	0.951	0.711	0	M2/M1	HLA-DQB1
C1QA1	0	1.07997	0.886	0.422	0	M2/M1	C1QA
HLA-DMA1	0	0.930249	0.952	0.735	0	M2/M1	HLA-DMA
ITM2B1	0	0.866297	0.996	0.948	0	M2/M1	ITM2B
IGSF211	3.03714e-299	0.677726	0.444	0.104	1.0186e-294	M2/M1	IGSF21
GPR341	1.06895e-294	0.853294	0.654	0.247	3.58504e-290	M2/M1	GPR34
FCGR1A	6.75033e-288	1.06549	0.849	0.525	2.26393e-283	M2/M1	FCGR1A
CD811	5.33688e-281	0.800799	0.973	0.774	1.78988e-276	M2/M1	CD81
FILIP1L1	7.65228e-269	1.00468	0.596	0.23	2.56642e-264	M2/M1	FILIP1L
CD69	2.56451e-254	1.11201	0.467	0.151	8.60086e-250	M2/M1	CD69
BHLHE41	3.70785e-248	0.762908	0.443	0.131	1.24354e-243	M2/M1	BHLHE41
LTC4S1	6.76238e-241	0.62612	0.581	0.222	2.26797e-236	M2/M1	LTC4S
CCL41	5.28682e-236	1.63381	0.8	0.505	1.77309e-231	M2/M1	CCL4
HLA-DMB1	6.05695e-226	0.704527	0.881	0.56	2.03138e-221	M2/M1	HLA-DMB
EMP2	9.66013e-222	0.533154	0.405	0.114	3.23981e-217	M2/M1	EMP2
RGS11	1.70761e-215	0.949495	0.763	0.448	5.72698e-211	M2/M1	RGS1
FCGR2A1	2.64063e-215	0.792237	0.92	0.723	8.85615e-211	M2/M1	FCGR2A
CCL4L21	3.12125e-213	1.69971	0.694	0.379	1.04681e-208	M2/M1	CCL4L2
FCGR3A	2.16362e-207	0.934357	0.924	0.738	7.25636e-203	M2/M1	FCGR3A
IL32	6.37256e-203	1.06609	0.268	0.052	2.13723e-198	M2/M1	IL32
VMO1	6.42408e-195	0.982748	0.617	0.305	2.15451e-190	M2/M1	VMO1
TSPAN33	2.41222e-192	0.449838	0.42	0.141	8.09009e-188	M2/M1	TSPAN33
GAS61	4.06485e-192	0.465966	0.615	0.268	1.36327e-187	M2/M1	GAS6
CX3CR1	5.19645e-192	0.65055	0.36	0.104	1.74278e-187	M2/M1	CX3CR1
SELENOP1	2.02207e-191	0.508214	0.675	0.281	6.78162e-187	M2/M1	SELENOP
C3AR11	3.17852e-188	0.733088	0.842	0.593	1.06601e-183	M2/M1	C3AR1
HERPUD11	4.48904e-186	0.879519	0.928	0.754	1.50553e-181	M2/M1	HERPUD1
FCGR1B	1.03934e-185	0.66397	0.575	0.269	3.48573e-181	M2/M1	FCGR1B
LPAR61	2.76966e-182	0.563315	0.623	0.303	9.28887e-178	M2/M1	LPAR6
HLA-DOA1	2.19131e-176	0.420691	0.414	0.141	7.34923e-172	M2/M1	HLA-DOA
YWHAH	6.23158e-176	0.689074	0.851	0.624	2.08995e-171	M2/M1	YWHAH
FOLR21	2.04151e-172	0.602907	0.676	0.328	6.84683e-168	M2/M1	FOLR2
HSPA81	2.13555e-169	0.583443	0.962	0.828	7.1622e-165	M2/M1	HSPA8
AXL1	1.55035e-164	0.441889	0.401	0.141	5.19955e-160	M2/M1	AXL
AKR1B11	8.80438e-164	0.48149	0.661	0.348	2.95281e-159	M2/M1	AKR1B1
C3	1.48123e-162	0.629528	0.306	0.087	4.96773e-158	M2/M1	C3
RB11	1.69439e-161	0.514272	0.703	0.405	5.68265e-157	M2/M1	RB1
USP53	2.27048e-161	0.392889	0.313	0.088	7.61472e-157	M2/M1	USP53
HSPA1A1	1.5886e-159	0.842816	0.889	0.66	5.32785e-155	M2/M1	HSPA1A
RASSF41	9.00856e-159	0.556394	0.75	0.469	3.02129e-154	M2/M1	RASSF4
EBI3	1.1965e-158	0.432989	0.264	0.064	4.01283e-154	M2/M1	EBI3
PLA2G16	9.12594e-157	0.367363	0.389	0.137	3.06066e-152	M2/M1	PLA2G16
TMEM176B1	5.10915e-155	0.619967	0.869	0.615	1.71351e-150	M2/M1	TMEM176B
SELENOM	4.33226e-153	0.532282	0.378	0.138	1.45295e-148	M2/M1	SELENOM
CTSC1	6.98163e-152	0.437638	0.911	0.678	2.3415e-147	M2/M1	CTSC
RGS101	5.43502e-151	0.503048	0.908	0.72	1.8228e-146	M2/M1	RGS10
TNFSF121	5.44774e-148	0.459523	0.745	0.457	1.82706e-143	M2/M1	TNFSF12
SERPING11	1.24552e-145	0.489944	0.504	0.23	4.17723e-141	M2/M1	SERPING1
PLTP1	1.74289e-145	0.471441	0.781	0.489	5.84531e-141	M2/M1	PLTP
MS4A6A1	6.02953e-145	0.568094	0.919	0.658	2.02218e-140	M2/M1	MS4A6A
TMEM176A1	3.70338e-144	0.516281	0.761	0.473	1.24204e-139	M2/M1	TMEM176A
BIN1	2.89116e-143	0.43352	0.369	0.138	9.69636e-139	M2/M1	BIN1
PTGER4	6.91132e-140	0.563426	0.672	0.402	2.31792e-135	M2/M1	PTGER4
HSPA1B1	4.70882e-139	0.63042	0.727	0.427	1.57924e-134	M2/M1	HSPA1B
SERPINF11	1.91598e-138	0.399722	0.415	0.167	6.42581e-134	M2/M1	SERPINF1
SARAF	7.8161e-138	0.466883	0.933	0.779	2.62136e-133	M2/M1	SARAF
CCL31	1.77181e-135	1.10643	0.853	0.687	5.94229e-131	M2/M1	CCL3
PLAU1	3.18758e-135	0.594625	0.436	0.191	1.06905e-130	M2/M1	PLAU
ITGA4	4.18587e-132	0.488996	0.596	0.332	1.40386e-127	M2/M1	ITGA4
DNAJB11	8.83603e-132	0.607906	0.746	0.48	2.96343e-127	M2/M1	DNAJB1
VSIG41	6.12175e-131	0.612387	0.743	0.489	2.05311e-126	M2/M1	VSIG4
HSP90AB1	1.62178e-129	0.469851	0.983	0.917	5.43913e-125	M2/M1	HSP90AB1
UGCG1	3.5959e-128	0.450894	0.556	0.291	1.20599e-123	M2/M1	UGCG
PNRC11	2.73796e-127	0.444445	0.982	0.92	9.18256e-123	M2/M1	PNRC1
CH25H1	3.67329e-127	0.972603	0.399	0.164	1.23195e-122	M2/M1	CH25H
PEBP11	2.49166e-126	0.426697	0.803	0.543	8.35653e-122	M2/M1	PEBP1
HSP90AA11	2.99064e-126	0.481527	0.989	0.933	1.003e-121	M2/M1	HSP90AA1
CCL3L11	4.21972e-125	1.13618	0.659	0.42	1.41521e-120	M2/M1	CCL3L1
HLA-DQA2	9.14026e-125	1.20603	0.373	0.155	3.06546e-120	M2/M1	HLA-DQA2
TNF	4.10734e-124	0.583142	0.318	0.115	1.37752e-119	M2/M1	TNF
TUBA1B1	1.71155e-123	0.520632	0.969	0.872	5.74019e-119	M2/M1	TUBA1B
FAM129A	3.47673e-122	0.411494	0.56	0.303	1.16603e-117	M2/M1	FAM129A
CCL5	4.22782e-122	1.29572	0.279	0.096	1.41793e-117	M2/M1	CCL5
IFITM2	8.05303e-122	0.35125	0.908	0.694	2.70083e-117	M2/M1	IFITM2
TPT11	3.90023e-120	0.415937	0.998	0.991	1.30806e-115	M2/M1	TPT1
DHRS7	5.85071e-117	0.456386	0.798	0.584	1.96221e-112	M2/M1	DHRS7
CST31	7.56403e-117	0.418527	0.995	0.983	2.53682e-112	M2/M1	CST3
CCDC85B	6.16982e-115	0.421283	0.724	0.486	2.06923e-110	M2/M1	CCDC85B
SAP30	2.48911e-114	0.561269	0.626	0.379	8.34798e-110	M2/M1	SAP30
CXCR4	1.8177e-112	0.676204	0.831	0.65	6.09622e-108	M2/M1	CXCR4
BTG21	2.42772e-112	0.485767	0.845	0.618	8.1421e-108	M2/M1	BTG2
RHOB1	1.89044e-111	0.563521	0.77	0.54	6.34016e-107	M2/M1	RHOB
SOCS1	2.33601e-111	0.327502	0.258	0.083	7.83451e-107	M2/M1	SOCS1
TUBA1A	3.04497e-111	0.667148	0.906	0.755	1.02122e-106	M2/M1	TUBA1A
ADAM28	6.18495e-111	0.307553	0.415	0.185	2.07431e-106	M2/M1	ADAM28
CDKN1C	2.59766e-110	0.356805	0.394	0.169	8.71205e-106	M2/M1	CDKN1C
UBC	4.38516e-110	0.383197	0.99	0.96	1.4707e-105	M2/M1	UBC
SNRPN	4.70443e-110	0.297817	0.418	0.194	1.57777e-105	M2/M1	SNRPN
P2RY131	5.38104e-109	0.490504	0.515	0.265	1.80469e-104	M2/M1	P2RY13
TSC22D31	1.12994e-107	0.602582	0.768	0.554	3.7896e-103	M2/M1	TSC22D3
SPINT2	1.23093e-107	0.409085	0.719	0.475	4.1283e-103	M2/M1	SPINT2
CCND2	1.46174e-106	0.299529	0.333	0.134	4.90237e-102	M2/M1	CCND2
OFD1	1.52066e-106	0.30265	0.306	0.116	5.1e-102	M2/M1	OFD1
PTMS1	3.36331e-106	0.416026	0.681	0.43	1.12799e-101	M2/M1	PTMS
A2M1	2.08e-105	0.440677	0.485	0.251	6.97589e-101	M2/M1	A2M
IFNGR1	2.30292e-105	0.504592	0.893	0.727	7.72355e-101	M2/M1	IFNGR1
C12orf57	4.49038e-105	0.430126	0.547	0.316	1.50598e-100	M2/M1	C12orf57
IFITM31	6.28113e-105	0.489364	0.912	0.749	2.10657e-100	M2/M1	IFITM3
ZFP36L2	2.48935e-103	0.587429	0.873	0.694	8.34877e-99	M2/M1	ZFP36L2
LDHB	2.81808e-102	0.382719	0.686	0.434	9.45128e-98	M2/M1	LDHB
ISCU1	4.97704e-102	0.364373	0.774	0.552	1.6692e-97	M2/M1	ISCU
MT-CYB	8.72096e-102	0.300213	0.994	0.968	2.92483e-97	M2/M1	MT-CYB
KLF21	5.40287e-101	0.644039	0.772	0.572	1.81202e-96	M2/M1	KLF2
RARRES3	4.56304e-100	0.373206	0.429	0.212	1.53035e-95	M2/M1	RARRES3
EPB41L21	3.2921e-99	0.32544	0.432	0.214	1.1041e-94	M2/M1	EPB41L2
GOLIM41	4.93408e-99	0.428629	0.525	0.303	1.65479e-94	M2/M1	GOLIM4
SGK1	2.18382e-98	0.558843	0.926	0.799	7.3241e-94	M2/M1	SGK1
GSN	2.77262e-98	0.368979	0.794	0.578	9.29882e-94	M2/M1	GSN
RPS19	5.38316e-98	0.323065	0.994	0.967	1.8054e-93	M2/M1	RPS19
FRMD4B1	2.70265e-97	0.315457	0.684	0.44	9.06413e-93	M2/M1	FRMD4B
GIMAP7	2.79296e-97	0.48393	0.404	0.195	9.36701e-93	M2/M1	GIMAP7
PIK3R1	6.26214e-97	0.401947	0.648	0.423	2.1002e-92	M2/M1	PIK3R1
OTUD1	4.3305e-96	0.675393	0.682	0.482	1.45236e-91	M2/M1	OTUD1
PPT1	4.78968e-95	0.386528	0.812	0.594	1.60636e-90	M2/M1	PPT1
ETV5	5.01592e-94	0.311694	0.409	0.202	1.68224e-89	M2/M1	ETV5
TAGAP	8.3919e-94	0.416239	0.595	0.363	2.81448e-89	M2/M1	TAGAP
TM6SF1	9.40783e-94	0.311196	0.42	0.212	3.1552e-89	M2/M1	TM6SF1
MS4A71	3.08061e-93	0.437427	0.918	0.793	1.03317e-88	M2/M1	MS4A7
TNFSF10	4.93688e-93	0.474068	0.584	0.338	1.65573e-88	M2/M1	TNFSF10
MRC11	1.19346e-92	0.305188	0.645	0.395	4.00262e-88	M2/M1	MRC1
MEF2A	3.47171e-92	0.316053	0.636	0.402	1.16434e-87	M2/M1	MEF2A
UBB1	4.9673e-92	0.330513	0.963	0.887	1.66593e-87	M2/M1	UBB
HLA-E	7.24292e-92	0.350307	0.984	0.927	2.42913e-87	M2/M1	HLA-E
LINC01094	7.82139e-92	0.310038	0.428	0.214	2.62314e-87	M2/M1	LINC01094
EEF1A1	4.59736e-91	0.286545	0.999	0.994	1.54186e-86	M2/M1	EEF1A1
HSPB11	2.06726e-90	0.471461	0.791	0.587	6.93317e-86	M2/M1	HSPB1
C1orf541	8.7044e-90	0.371418	0.507	0.293	2.91928e-85	M2/M1	C1orf54
IL181	1.10504e-89	0.391204	0.656	0.43	3.70608e-85	M2/M1	IL18
CLEC2B	2.92996e-89	0.411433	0.84	0.658	9.8265e-85	M2/M1	CLEC2B
RPL3	6.39803e-89	0.35251	0.989	0.939	2.14577e-84	M2/M1	RPL3
HTRA1	1.31218e-88	0.568212	0.347	0.164	4.40078e-84	M2/M1	HTRA1
TMEM109	2.49138e-88	0.314507	0.489	0.275	8.35558e-84	M2/M1	TMEM109
ALOX5AP	9.38255e-87	0.480897	0.661	0.437	3.14672e-82	M2/M1	ALOX5AP
SRGAP1	1.30062e-85	0.258263	0.361	0.171	4.362e-81	M2/M1	SRGAP1
IER51	1.99239e-85	0.40132	0.669	0.434	6.68207e-81	M2/M1	IER5
SLCO2B11	1.15504e-83	0.271507	0.494	0.273	3.87379e-79	M2/M1	SLCO2B1
CCDC50	2.76117e-83	0.257576	0.419	0.219	9.26042e-79	M2/M1	CCDC50
MARCKS1	2.95176e-83	0.39749	0.947	0.818	9.89961e-79	M2/M1	MARCKS
KCNMA11	3.43775e-83	0.270309	0.428	0.218	1.15295e-78	M2/M1	KCNMA1
CD83	2.68885e-82	0.479802	0.917	0.833	9.01788e-78	M2/M1	CD83
TCF41	2.97097e-82	0.287018	0.41	0.213	9.96405e-78	M2/M1	TCF4
RPS27A	3.88521e-82	0.263704	0.996	0.978	1.30302e-77	M2/M1	RPS27A
BCL2	4.36158e-82	0.256588	0.342	0.16	1.46279e-77	M2/M1	BCL2
TMEM173	6.94142e-82	0.29011	0.503	0.286	2.32801e-77	M2/M1	TMEM173
HSPH11	1.06413e-81	0.339204	0.59	0.365	3.56889e-77	M2/M1	HSPH1
SNX61	1.52587e-81	0.351503	0.863	0.689	5.11746e-77	M2/M1	SNX6
MGAT4A1	3.72958e-80	0.312791	0.639	0.415	1.25083e-75	M2/M1	MGAT4A
RPS27	8.34213e-80	0.300665	0.99	0.96	2.79778e-75	M2/M1	RPS27
STMN11	1.11934e-79	0.294406	0.566	0.34	3.75405e-75	M2/M1	STMN1
GLS	3.01254e-79	0.285081	0.619	0.402	1.01035e-74	M2/M1	GLS
GIMAP4	1.2135e-78	0.327244	0.632	0.4	4.06985e-74	M2/M1	GIMAP4
LGALS3BP	2.10368e-78	0.297685	0.306	0.138	7.05532e-74	M2/M1	LGALS3BP
CXCL121	2.54892e-78	0.260414	0.271	0.109	8.54857e-74	M2/M1	CXCL12
KLF61	3.00562e-78	0.508964	0.956	0.845	1.00803e-73	M2/M1	KLF6
AES	2.54676e-77	0.297541	0.634	0.434	8.54134e-73	M2/M1	AES
PIK3IP1	5.06736e-77	0.261133	0.281	0.12	1.69949e-72	M2/M1	PIK3IP1
ARL2	5.4689e-77	0.280741	0.529	0.322	1.83416e-72	M2/M1	ARL2
ARL4C1	1.36544e-76	0.393114	0.692	0.466	4.57942e-72	M2/M1	ARL4C
MSR1	1.72842e-76	0.422612	0.844	0.64	5.79678e-72	M2/M1	MSR1
MPC2	3.48296e-76	0.326957	0.617	0.416	1.16812e-71	M2/M1	MPC2
EIF4A2	7.24309e-76	0.300421	0.627	0.419	2.42919e-71	M2/M1	EIF4A2
NFKBIZ	9.38094e-76	0.342873	0.508	0.298	3.14618e-71	M2/M1	NFKBIZ
LPCAT2	9.89774e-76	0.353468	0.581	0.383	3.3195e-71	M2/M1	LPCAT2
TMEM14C	1.75458e-75	0.337158	0.822	0.635	5.88451e-71	M2/M1	TMEM14C
DNAJA1	4.6311e-75	0.329338	0.901	0.772	1.55318e-70	M2/M1	DNAJA1
STOM1	7.37795e-74	0.253985	0.513	0.304	2.47442e-69	M2/M1	STOM
ID3	1.67254e-73	0.538011	0.396	0.217	5.60936e-69	M2/M1	ID3
JUNB	1.75864e-73	0.380663	0.979	0.926	5.89812e-69	M2/M1	JUNB
GBP4	1.27488e-72	0.250782	0.254	0.104	4.27569e-68	M2/M1	GBP4
NUCKS1	8.28597e-72	0.298572	0.831	0.652	2.77895e-67	M2/M1	NUCKS1
ID2	1.6651e-71	0.422354	0.613	0.416	5.58441e-67	M2/M1	ID2
PTPRC	3.39182e-71	0.282455	0.968	0.854	1.13755e-66	M2/M1	PTPRC
TMSB4X1	3.58577e-71	0.283299	0.999	0.992	1.2026e-66	M2/M1	TMSB4X
PMAIP1	1.65415e-70	0.42052	0.397	0.217	5.54768e-66	M2/M1	PMAIP1
HGF	1.84814e-70	0.274269	0.283	0.128	6.19828e-66	M2/M1	HGF
CXCL16	3.06523e-70	0.362575	0.84	0.679	1.02802e-65	M2/M1	CXCL16
MEF2C	3.23313e-70	0.301357	0.743	0.544	1.08433e-65	M2/M1	MEF2C
TOMM7	5.26018e-70	0.287693	0.926	0.799	1.76416e-65	M2/M1	TOMM7
DDX5	5.38232e-70	0.35014	0.964	0.896	1.80512e-65	M2/M1	DDX5
ENPP21	6.99656e-70	0.284583	0.298	0.135	2.34651e-65	M2/M1	ENPP2
EGR11	6.20555e-69	0.333116	0.333	0.162	2.08122e-64	M2/M1	EGR1
RPL13A	1.15857e-68	0.290779	0.989	0.938	3.8856e-64	M2/M1	RPL13A
RPSA	1.45735e-68	0.30161	0.971	0.884	4.88766e-64	M2/M1	RPSA
IER2	1.03671e-67	0.408489	0.872	0.732	3.47692e-63	M2/M1	IER2
FGL21	1.85149e-66	0.352185	0.813	0.558	6.20953e-62	M2/M1	FGL2
EEF1B2	1.02046e-65	0.291573	0.975	0.894	3.42241e-61	M2/M1	EEF1B2
CD721	1.51119e-65	0.256226	0.369	0.196	5.06822e-61	M2/M1	CD72
SLC1A31	1.51536e-65	0.303118	0.431	0.25	5.08222e-61	M2/M1	SLC1A3
LITAF	2.13859e-65	0.364443	0.91	0.803	7.1724e-61	M2/M1	LITAF
FYB1	7.23988e-65	0.298355	0.894	0.73	2.42811e-60	M2/M1	FYB1
DDIT3	7.90664e-65	0.25735	0.415	0.238	2.65173e-60	M2/M1	DDIT3
RHOC	1.77261e-64	0.302512	0.684	0.48	5.94499e-60	M2/M1	RHOC
ARID5A	1.91269e-64	0.258964	0.558	0.362	6.41476e-60	M2/M1	ARID5A
LAT2	4.24907e-64	0.264898	0.522	0.327	1.42505e-59	M2/M1	LAT2
ARL6IP5	6.49402e-64	0.28876	0.923	0.798	2.17796e-59	M2/M1	ARL6IP5
SMAP2	6.65005e-64	0.280224	0.819	0.632	2.23029e-59	M2/M1	SMAP2
CKLF	1.04753e-62	0.362511	0.807	0.65	3.5132e-58	M2/M1	CKLF
SLAMF81	1.79974e-62	0.29219	0.457	0.28	6.03598e-58	M2/M1	SLAMF8
2023-03-02	3.14102e-62	0.260221	0.682	0.492	1.05344e-57	M2/M1	2023-03-02
GRASP	5.55425e-62	0.344205	0.444	0.264	1.86279e-57	M2/M1	GRASP
IER5L	6.61715e-62	0.38123	0.433	0.262	2.21926e-57	M2/M1	IER5L
CIRBP	2.05723e-61	0.277789	0.836	0.677	6.89954e-57	M2/M1	CIRBP
DUSP1	4.10805e-61	0.307257	0.98	0.911	1.37776e-56	M2/M1	DUSP1
LMO2	9.81833e-61	0.286972	0.619	0.435	3.29287e-56	M2/M1	LMO2
DPYSL2	7.27035e-60	0.254489	0.64	0.45	2.43833e-55	M2/M1	DPYSL2
CD40	1.01213e-59	0.353934	0.361	0.207	3.39448e-55	M2/M1	CD40
NCF41	1.4589e-59	0.272846	0.753	0.574	4.89287e-55	M2/M1	NCF4
MFSD11	1.61148e-59	0.266696	0.803	0.639	5.40458e-55	M2/M1	MFSD1
CEBPD1	1.63212e-58	0.404575	0.982	0.948	5.47379e-54	M2/M1	CEBPD
NOP53	3.47016e-57	0.263081	0.721	0.541	1.16382e-52	M2/M1	NOP53
SCAMP2	6.74548e-56	0.267921	0.735	0.568	2.2623e-51	M2/M1	SCAMP2
ZFP36	8.32484e-56	0.265447	0.969	0.885	2.79198e-51	M2/M1	ZFP36
OGFRL1	1.72121e-55	0.292633	0.613	0.438	5.77259e-51	M2/M1	OGFRL1
ATP1B11	1.76571e-55	0.252442	0.543	0.356	5.92183e-51	M2/M1	ATP1B1
CD141	5.65745e-54	0.356284	0.974	0.921	1.8974e-49	M2/M1	CD14
LY86	8.42874e-54	0.294224	0.756	0.574	2.82683e-49	M2/M1	LY86
HSPE11	5.12643e-52	0.281913	0.838	0.682	1.7193e-47	M2/M1	HSPE1
FOS	1.03422e-50	0.407756	0.983	0.938	3.46855e-46	M2/M1	FOS
EIF5	3.39952e-50	0.259808	0.791	0.65	1.14013e-45	M2/M1	EIF5
RPS20	7.16885e-50	0.265868	0.962	0.905	2.40429e-45	M2/M1	RPS20
NUB1	2.66141e-49	0.250236	0.472	0.309	8.92585e-45	M2/M1	NUB1
MYL12A	3.71621e-47	0.26421	0.963	0.887	1.24634e-42	M2/M1	MYL12A
DUSP5	4.45012e-47	0.295663	0.333	0.192	1.49248e-42	M2/M1	DUSP5
FAM49B	2.45348e-46	0.251698	0.838	0.715	8.22847e-42	M2/M1	FAM49B
APOBEC3G	1.1767e-45	0.253968	0.306	0.177	3.94642e-41	M2/M1	APOBEC3G
KLF41	2.34426e-45	0.335066	0.812	0.679	7.86219e-41	M2/M1	KLF4
TREM2	5.8752e-42	0.253851	0.458	0.296	1.97042e-37	M2/M1	TREM2
BST2	1.42584e-41	0.259968	0.879	0.766	4.78199e-37	M2/M1	BST2
CREM	2.49777e-40	0.257723	0.711	0.55	8.37701e-36	M2/M1	CREM
GPR183	5.59456e-39	0.477512	0.819	0.745	1.8763e-34	M2/M1	GPR183
CXorf21	1.6533e-37	0.355971	0.413	0.282	5.54482e-33	M2/M1	CXorf21
H3F3B	3.76126e-37	0.258079	0.999	0.982	1.26145e-32	M2/M1	H3F3B
SRSF7	1.48105e-35	0.257525	0.771	0.649	4.96714e-31	M2/M1	SRSF7
TAGLN	6.6556e-33	1.53976	0.25	0.15	2.23215e-28	M2/M1	TAGLN
MAFF	8.44963e-33	0.270996	0.455	0.325	2.83384e-28	M2/M1	MAFF
MGP	4.85939e-31	1.88683	0.514	0.4	1.62974e-26	M2/M1	MGP
GYPC1	9.27456e-29	0.251794	0.611	0.485	3.1105e-24	M2/M1	GYPC
TXNIP	6.44304e-28	0.355457	0.824	0.738	2.16087e-23	M2/M1	TXNIP
EIF4A3	1.62904e-26	0.297053	0.68	0.561	5.46348e-22	M2/M1	EIF4A3
IGLC2	2.25391e-22	0.542611	0.315	0.215	7.55916e-18	M2/M1	IGLC2
DUSP2	2.97843e-20	0.256742	0.578	0.471	9.98906e-16	M2/M1	DUSP2
IGFBP7	1.0783e-16	1.43653	0.438	0.364	3.6164e-12	M2/M1	IGFBP7
TPM1	1.23384e-12	0.345334	0.264	0.2	4.13804e-08	M2/M1	TPM1
DSTN	1.98381e-08	0.322014	0.641	0.562	0.00066533	M2/M1	DSTN
