# Supplementary material for: Integrating the characteristic genes of macrophage pseudotime analysis in single-cell RNA-seq to construct a prediction model of atherosclerosis
Source: Aging (Albany NY). 2023 Jul 8;15(13):6361–79. doi: 10.18632/aging.204856 (PMC10373969; doi:10.18632/aging.204856)
Supplement: Supplementary Table 4 [file aging-15-204856-s004.xlsx]

## Sheet: Sheet1
Supplementary Table 4. The 1086 AS-characteristic genes.
STRN3
PGRMC1
FUCA2
SAV1
ZNF639
F10
ARSB
PRKX
HCFC2
TRIM25
RCC2
EIF4A1
CKLF
MCM5
RHOG
LRRC8C
PITPNB
DAGLB
FAM13B
PAK1
RSF1
STK39
HDGFL3
AKIRIN2
MTA3
HLA-A
PARVA
SATB2
GPAM
SBDS
NECAP2
FBXL7
MAP3K14
TPM3
HLA-G
RAB33B
RWDD2A
BEST1
HM13
FGD3
MCU
MOCS2
BCAP29
MBIP
ZNF420
ARHGAP10
COL4A3
IFNGR2
PTBP3
C17orf75
STBD1
DIPK2A
SENP6
NSF
GALNT2
ZFP36L1
GAB1
APLF
NCSTN
VAMP4
SERINC5
RUNX1
CREBRF
MAP6
RNASEK
TBC1D9
NKIRAS1
HEATR3
UBA2
C1QTNF2
ARHGAP9
GASK1B
ARMCX1
RCSD1
PLCG2
SLFN11
CDC42SE2
SLC38A7
CAMSAP2
NDRG3
ARPC3
PSMB10
TMEM74
RECK
SYT11
ARHGEF12
DAG1
PBXIP1
RNF135
TTLL11
HLA-E
PRELID2
TMEM43
DNMT1
PCYOX1
EZR
OSBPL11
WIPF1
KATNAL1
NHSL1
DOK3
C12orf29
TCEAL6
ENOX2
CTTN
TCEAL5
ZBTB10
S100A11
CYBC1
OGFRL1
CDK5RAP2
HVCN1
SPAG16
PEG3
MYO1B
TAP2
PCK2
PIK3CD
BPNT2
RNPEP
ZFYVE26
POGLUT3
METAP1
SPIN4
NKD1
GSR
HLA-C
TNFAIP8L2
MAGED2
FAM184A
ACTA2
PARP4
ZNF217
TCEAL4
C5orf24
JRKL
GAB3
SEC14L1
EFTUD2
PPP1CB
FGFR1
PTAFR
TFDP2
ARHGDIB
AMER1
GLB1
WASF3
AP1G2
HPD
STAC3
FAM126A
EPM2A
GGA2
EDEM2
TMEM140
GPD2
TPST2
NAP1L5
TBC1D30
BCKDHB
ST7
CEP85
MKNK1
JARID2
MOB3A
RNF130
MYO9A
SLC3A2
PPP1R3B
ZHX3
ZNF441
RCL1
GBGT1
SEPTIN6
ZNF827
RUNX2
CHKA
IFNGR1
SERAC1
ATG7
BID
TRPV4
EOGT
FRMD6
MID2
HEXA
PPFIBP1
SYNE1
TRDMT1
PDXK
PALM2AKAP2
SLC7A5
DSE
UST
TPM3P9
TCEAL1
ATL3
SOBP
TAPBP
NAGK
LAT2
GNG12
TMEM106C
ELOVL4
PFKM
GNS
TMEM106A
NEU1
TET3
CHST11
ROCK2
TTC33
GLMP
PPP1CA
GPR132
HLA-B
SESTD1
KIF13A
LACTB
M6PR
TRAF3
LARGE1
SH2B3
MTMR14
KCTD10
PTK2
CTSA
IL10RB
DZIP1
HABP4
DKK3
IPMK
ZFAND1
MFGE8
SLC43A2
REEP4
PDK3
SUN1
MAP7D3
LANCL1
ZDHHC15
LST1
SSX2IP
NLN
SMARCD3
CALCOCO1
MARCKS
BMERB1
BLVRB
PKIG
DNAJC18
NEXMIF
BCAM
PTK2B
RIPK3
EMP2
HLA-F
PI4K2A
FGF2
IFNAR2
MIB1
GRB2
DIXDC1
PRCP
REL
PEG10
SLC9A7
GRAMD2B
PHOSPHO2
DDAH1
LGR4
CALML4
TAF9B
NOD2
ATP6V0C
SLC25A19
PARP12
MAF
DTX3L
NPR2
IL17RA
LGALSL
ADPGK
SDCBP
TACC3
SH3BP2
AEBP2
PYGL
STX11
PACC1
IVNS1ABP
SGCA
ABHD3
OSTF1
FEZ1
GNPTAB
RBFOX2
SLC2A9
PREPL
CCDC8
MAP3K1
TAGLN
JAK3
SLC8B1
RASSF5
DCUN1D4
SIPA1L2
TJP1
STK38L
PRDM5
ATP2B1
BAZ1A
PPP1R12A
TRIM14
BRMS1L
CREG1
DACT1
AKT3
TAP1
SCMH1
PAPSS2
ASAP1
APOOL
HHEX
RBM24
TLE1
NRROS
ATP6V1B2
LAP3
APOL6
WNK3
HDX
MYD88
CHST15
FZD7
IRF5
KCNS3
FGD6
LURAP1L
SLC39A11
PSD4
PYGO1
ATP8B1
SLC41A2
RHBDF2
SECTM1
ATP6V0B
SSH2
TMEM37
PSIP1
CARMIL1
ADRA1B
NRP1
P2RX4
NAGA
HOMER1
DMTN
MYL9
NXPH3
TRIB1
PALLD
CSK
EZH2
ARPC1B
TNFSF15
PRKCD
CEP70
PXDC1
FKBP15
CLN6
ARRDC4
CHD7
AKTIP
OTUD7B
MECOM
BHLHE40
MAP3K20
ABCC3
TMEM25
MAPKAPK3
GMIP
ASB2
NUP210
SMARCA1
BEND5
PID1
SLMAP
DDR2
HEPH
SLC20A2
KLHL42
SEMA4A
SHTN1
OCA2
FZD6
GARNL3
SASH3
WARS1
SGPL1
ITGB1BP2
RNF115
KANSL1L
CASP10
TLN2
FRMD7
PXYLP1
KPNA2
VGLL3
PARD3
SIGLEC7
ST3GAL5
NRP2
KCNMB1
PLEKHB2
NIBAN1
TYMP
CTNNAL1
LMNB1
FAM149A
SLC36A1
ATP6V0D1
SLAIN1
IL4I1
TCIRG1
TWSG1
FAM78A
TES
MBNL3
LRRC1
ADCY9
NPC1
LRRC8D
TMSB10
ATP6V1A
ACER3
CAV1
GAS7
PDZD2
GALC
TSTD1
CSF1
PAM
ATOH8
SH3D19
TSPAN12
CYRIA
FTL
PM20D2
MACROH2A1
CNKSR3
NECTIN3
LPP
RRAD
GRIA3
CACNB2
CSRP1
NEDD4L
TRPV2
SNX25
TPP1
PAWR
KCNK17
CD300C
AKAP1
PLA2G15
SLC20A1
PRKD1
AMPH
PTGER4
EXT1
DLG3
MTMR11
CTPS1
NCKAP1
HSPA2
COBLL1
ERBB2
SLC43A3
CAMK2G
RAP2B
GLUL
ETNK2
FGD2
ME2
AOC3
MFNG
PART1
SLC29A3
SNCAIP
DOP1B
KBTBD3
LIMK1
TSPAN14
ARHGEF3
RYR3
LPAR1
TBL1X
SIRPA
PRDM16
ATP11A
TOM1L1
JPH2
FGFR2
MTURN
SGCB
LOC646903
GSAP
CPE
VCL
ZFYVE9
CALD1
ADCY7
DSTN
PTGS1
BARD1
CLMN
IDH1
TMEM237
SDK1
KCNMA1
EGFR
TACC2
MFSD1
ZNF507
SPEG
RNF125
RGL1
CSF2RB
IRF1
KLHL13
MPDU1
ZEB1
BMP2K
GRK5
PBX1
DOCK4
ATP9A
MYOC
HSPB6
INPP5A
ARHGAP4
OSR1
RENBP
PPIF
HCP5
ZNF267
CDKL5
NAALADL2
SOAT1
ARSJ
RFTN2
DAB2
NEDD4
C14orf132
OPN3
MPDZ
GPR137B
ZDBF2
CC2D2A
CYTH1
CMTM7
SACS
GUSB
FGF1
PIK3R5
LMCD1
SAMHD1
SCHIP1
MMD
PHGDH
SLC24A3
FXYD1
FERMT2
SV2A
PMEPA1
PPP2R3A
ELMO1
RAB9B
MRGPRF
YAP1
ACSS3
RASL12
RNF144B
ADGRA3
PCDHB14
MSRB3
TCEA3
FLI1
MKX
GTF2A1L
CSTB
PPP2R2B
FCGRT
OXCT1
PLS3
GPR63
GKAP1
MYLK
CAV2
RUBCNL
SP140
LRP6
RBMS3
TRIM36
EPB41L5
CD33
SMOC2
OTULINL
SNORD116-23
WDFY4
FAXC
LRRC25
TNFAIP2
PTPRJ
TNFAIP3
PRKCH
GREB1L
BTC
RPS6KA1
CDCP1
SFMBT2
MYO5A
PYGM
CNDP2
TBX18
GZMB
PLD3
PLCB2
DRAM1
CASP1
TMEM176B
TBC1D2
CYRIB
CDO1
ROR1
LILRB2
GPAT3
ARHGAP18
TMEM30B
CRIM1
ADAMTS1
AADAT
SLC25A4
CSF2RA
ARMH4
ITIH5
SMAP2
CORO1A
NFIA
PTPRE
ARHGEF9
GNA15
STYXL2
SLC7A8
PILRA
NLRP3
SPI1
CTSB
INPP5D
FILIP1L
PDCD1LG2
AMIGO2
PDLIM3
RNASET2
GLA
LGMN
GAREM1
GALNT6
CCDC3
LIMCH1
TREM2
SLC31A2
TPM2
STXBP2
BAG2
PKD2
BVES
TAGAP
ENAH
GNAI1
PPP1R14A
FMOD
CEMIP2
IL6R
LPXN
PTPN21
LOC100996333
SLC6A6
FUCA1
IRAG1
PDE1A
FMNL1
CD37
CHSY3
ALDH1B1
CRYBG1
IRAG2
AIF1
SPARCL1
MAP1B
MAN2B1
DOK2
CRYAB
LGR6
PARVG
CKMT2
LGALS9
ACP2
TNFSF8
ADAM8
GPRC5A
LINC01106
PTPN3
RBPMS
PLEKHO2
ACKR4
PLAU
GJA1
VAV1
CFL2
ANO1
TMOD1
FBLN5
AMPD3
TIAM1
ARHGAP30
DNAJB4
SMAD9
HCLS1
BMPR1A
AKAP5
LDB3
CD83
PIK3CG
ITGA8
TLR6
OSBPL3
UBASH3B
ARHGAP25
GRK3
GRN
SYNM
MPP1
IKZF1
VIPR2
MAFB
DUSP26
CNIH3
SELPLG
RASSF4
CALHM5
LHFPL2
SGCE
NCF4
MTSS1
TRPC1
NTRK3
DENND2D
RGS5
ITGAL
SVIL
THEMIS2
ID4
PPP1R9A
ZNF483
ADGRE2
PCDHB16
NAP1L3
SMTN
ANXA3
MANSC1
TNFRSF1B
TBXAS1
MNDA
CYBB
RNF180
FYB1
LONRF2
BAMBI
NCEH1
MYO1F
MYLIP
OGN
CMIP
CTSC
ACSL5
PGM5
P2RX7
LYN
SYNC
HCST
LILRB1
TCN2
TTYH3
ARRB1
DMXL2
SH3BGR
LINC01123
TNFRSF21
RAB23
SLC7A7
ATP1A2
RBM47
MYH11
CPED1
SCARA3
KANK1
ECM2
REEP1
DEPTOR
MARK1
GALNT17
DHRS9
ADAP2
OAS1
RASGEF1B
FOLR2
SGCD
CXCL16
LCP2
MMP19
MAPK13
DAPP1
LAYN
PDE5A
HK3
PTPN6
ZNF385D
NOX4
ICAM1
ANKS1B
RAVER2
C1QB
GIMAP1-GIMAP5
EPB41L3
RGCC
NEO1
RERG
PFN2
MYOZ2
CCN3
LILRB3
CAB39L
ARAP2
SLC15A3
EMILIN2
GPRIN3
ACTN2
PRKCB
B3GNT5
SCIMP
FAM20A
HMCN1
ALOX5
GIMAP2
RAC2
SLC39A8
SNORD116-6
GIMAP4
ARRB2
HCK
MCAM
SAMSN1
TYROBP
CTSL
NABP1
VSIG4
KCNAB2
LAPTM5
CTSH
CYTH4
ITGB7
C1QC
ZNF385A
SLC37A2
CD300LB
MTUS2
ARHGEF26
MARCHF1
CSF1R
FERMT3
PLXNC1
HSPB8
LIPA
CA2
UCP2
STAC
TC2N
FGR
KCNA5
HSPA4L
SLCO2B1
C1QA
STK10
SHROOM3
PCDH7
CD53
BTK
MYH10
CATSPERB
IRF8
SYDE2
ADAMTSL3
SYK
TSPAN2
HACD1
NALCN
LGALS9C
KLHL6
FILIP1
APBB1IP
ADA2
C1orf162
PARM1
MAOB
AKAP6
PRKG1
PPP1R3C
DOCK8
DOCK2
ANO5
MEIS1
KCNAB1
GEM
CAP2
TMEM47
MPEG1
HSPB7
SKAP2
CTSS
HLF
GPLD1
PTPN22
SLAMF6
C5AR1
SLC2A5
ZNF711
MAP2
STAB1
LAIR1
BIN2
PAK3
LRCH2
PLAUR
SCUBE3
PLCE1
SLA
NT5DC3
LDOC1
MPP6
CD163L1
DMD
CD14
CD300A
SYNPO2
LCP1
SUSD5
LMOD1
DDX60L
IL10RA
SORBS1
METTL24
PLEKHH2
SGK1
ASPN
PGD
HAVCR2
CD4
MPP7
PDZRN4
SLAMF8
MCTP1
RASGRP3
CD68
NCKAP1L
CD86
ADCY5
HEY2
PGR
LY86
CD48
MRC1
IL2RG
GULP1
FCER1G
CPVL
NEXN
NLRC4
NAP1L2
NRK
SERPINF1
TASL
PIK3AP1
PLBD1
AOAH
NCF2
CD84
TCEAL2
PRDM1
GMFG
ZNF204P
MYEF2
SLC2A12
DCSTAMP
VAV3
PDZRN3
GREM1
NEGR1
SEL1L3
HK2
CNN1
SLC22A3
ITGB2
ITGAM
TFEC
MYOM1
MPPED2
PRUNE2
C2
TTLL7
IFI30
NPNT
NLGN1
SBSPON
TLCD4
SLAMF7
PCDH20
LILRB4
PLD5
NPL
FIBIN
IL31RA
THRB
FREM1
C1QTNF7
PLEK
CD163
PLN
CD180
ANGPTL1
NPR1
SNX10
UNC13C
ACADL
GRIA1
CCR1
PLCB4
KMO
TDO2
MRAP2
KYNU
CYTIP
ITGAX
LGI1
ACTC1
SEMA3D
ANPEP
LRRN1
NPR3
PDE8B
RYR2
LINC00670
SLC28A3
PLIN2
PCDH11X
RPS6KA6
CNTN3
NPY1R
CD52
IL1RN
FHL5
HMOX1
HAND2-AS1
PLA2G7
ATRNL1
MYOCD
CASQ2
MME
DPP4
CNTN4
FABP5
TM4SF19
CNTN1
TPH1
MMP9
CD36
