# Supplementary material for: Integrating the characteristic genes of macrophage pseudotime analysis in single-cell RNA-seq to construct a prediction model of atherosclerosis
Source: Aging (Albany NY). 2023 Jul 8;15(13):6361–79. doi: 10.18632/aging.204856 (PMC10373969; doi:10.18632/aging.204856)
Supplement: Supplementary Table 5 [file aging-15-204856-s005.xlsx]

## Sheet: Sheet1
Supplementary Table 5. The 223 DEGs in the macrophage trajectory analysis.
IGKC
IGLC3
HLA−DMB
MS4A6A
HLA−DMA
HLA−DRA
HLA−DPB1
HLA−DRB1
HLA−DPA1
HLA−DQB1
CD74
HLA−DRB5
HLA−DQA2
TMEM176A
HLA−DQA1
TMEM176B
ITM2B
CD81
C1QA
RGS1
C1QC
C1QB
CCL4
ARL4C
CTSC
CCL4L2
DAB2
LGMN
FILIP1L
FOLR2
PMP22
MS4A4A
PLTP
SLC40A1
CCL18
SELENOP
A2M
MS4A7
KCNMA1
LYVE1
CCL13
EGR1
PDK4
CXCL12
IGF1
LILRB5
FCGR2A
TFRC
CFD
F13A1
DNAJB1
CCL8
STAB1
GAS6
MAF
C2
SLCO2B1
CCL3
MRC1
GPR34
SERPING1
MT−ND3
MT−CYB
HSPA1A
CCL3L1
HSPA1B
HSP90AA1
CH25H
HSPH1
CCL2
MT2A
CD36
MMP7
FABP4
MT1X
SLAMF9
MT1H
MT1G
CCL7
AREG
LYZ
G0S2
S100A8
FCN1
IL1B
S100A9
S100A12
CD52
SMIM25
TIMP1
LSP1
FBP1
S100A6
PKM
BCL2A1
EREG
VCAN
MARCO
MIF
PGK1
LDHA
PHLDA1
ENO1
FABP5
TPI1
PGAM1
SPP1
GLIPR2
IL1RN
CSTB
LGALS1
VIM
RGCC
FN1
C15orf48
S100A11
SH3BGRL3
S100A10
GAPDH
FGL2
CXCL10
CST3
IFITM3
CXCL9
LTC4S
HERPUD1
LPAR6
FCGR1A
RASSF4
IGFBP7
TPM2
MYL9
ACTA2
SPARCL1
CALD1
PTGDS
TAGLN
CLU
MGP
IGSF21
EMP2
FCGR3A
VSIG4
VMO1
CLDN1
C3AR1
AKR1B1
SERPINF1
PLAU
BHLHE41
FCGBP
CTSD
RNASE1
LGALS3
CTSL
APOC1
FTL
SPINK1
CYP27A1
ERO1A
SDC2
GCHFR
GSTO1
FTH1
PLIN2
MMP19
SLC11A1
FLNA
MGST1
AQP9
ANPEP
EMP3
JUN
MT−ND1
MT−ND2
EMP1
TTN
SCN9A
ABCA6
NEAT1
FOSB
HNRNPU
NRP1
CD209
AC020916.1
DUSP6
P2RY14
MAMDC2
IGLC2
CD163
CSF1R
TSC22D3
KLF6
RPL10
RPL7A
RPL8
ADIRF
DSTN
LMOD1
MYH10
MFAP4
TM4SF1
RAMP2
FHL1
CCL19
ITLN1
FRZB
COL14A1
RGS5
SOD3
IGFBP5
OGN
CTGF
BGN
MAP1B
AEBP1
NNMT
CYR61
MYH11
PPP1R14A
IGFBP2
CAV1
C11orf96
